# Supplementary material for: HFIP-promoted phosphorylation of indol-3-yl methanols to access (indol-3-yl)methyl phosphonates
Source: Royal Society of Chemistry journal article supplement (doi:10.1039/d5ob00129c), 2025-01-01
Supplement: d5ob00129c1.pdf [file d5ob00129c1.pdf]

## Supporting Information

### HFIP-promoted phosphorylation of indol-3-yl methanols to access (indol-3-yl)methyl phosphonates

Min Wang, Zhiyu Zhang, Yuting Yang, Yage Xue, Zhengyi Qin, Yaxuan Duan, Huilin Li,\*  
and Xuegong She

State Key Laboratory of Applied Organic Chemistry, College of Chemistry and Chemical  
Engineering, Lanzhou University, 222 South Tianshui Road, Lanzhou 730000, P. R. China.

\* [lihuilin@lzu.edu.cn](mailto:lihuilin@lzu.edu.cn)

### Table of Contents

|                                       |     |
|---------------------------------------|-----|
| 1. General information .....          | S2  |
| 2. Substrate preparation .....        | S3  |
| 3. Scope and generality studies ..... | S10 |
| 4. Mechanism study .....              | S22 |
| 5. References .....                   | S25 |
| 6. NMR spectra copies .....           | S25 |

## 1. General information

All reactions were carried out under air, in oven dried glassware with magnetic stirring, unless otherwise noted. All commercially available compounds were purchased from Energy<sup>®</sup> Scientific Ltd or Shanghai Macklin Biochemical Co., Ltd and used without further purification. Dry CH<sub>2</sub>Cl<sub>2</sub> was distilled from CaH<sub>2</sub>. Anhydrous THF was distilled from sodium sand. Flash column chromatography was performed on silica gel (particle size 200-300 mesh, purchased from Qingdao Puke Co., China) and eluted with petroleum ether /ethyl acetate. <sup>1</sup>H, <sup>13</sup>C and <sup>31</sup>P NMR spectra were collected on a Bruker AV 400 MHz NMR spectrometer using residue solvent peaks as an internal standard (<sup>1</sup>H NMR: CDCl<sub>3</sub> at 7.26 ppm, DMSO-*d*<sub>6</sub> at 2.50 ppm, <sup>13</sup>C NMR: CDCl<sub>3</sub> at 77.0 ppm, DMSO-*d*<sub>6</sub> at 39.5 ppm). NMR data are reported as follows: chemical shift (δ ppm), multiplicity (s = singlet, d = doublet, t = triplet, q = quartet, m = multiplet), dd (doublet of doublets), dt (doublet of triplets). Melting point was measured on the melting point meter without calibration prior use. LC-MS data were collected on Agilent 1260-6125B (Column: Unisil 5-120 C18 Ultra, Dimensions: 4.6 × 150 nm, 5 μm, Eluent: water and acetonitrile with 0.1% TFA, ESI). High-resolution mass spectra (HRMS) were recorded on Thermo Scientific Orbitrap Exploris 120 mass spectrometer using electrospray ionization (ESI) technique and a TOF analyzer.

## 2. Substrate preparation

All the alcohol substrates used in this work are shown below. **1a** and **2a-2f** were purchased. **1b**<sup>1</sup>, **1c**<sup>2</sup>, **1h**<sup>3</sup>, **1l**<sup>4</sup>, **1o**<sup>5</sup>, **1q**<sup>6</sup>, **1r**<sup>7</sup>, **1t**<sup>8</sup> are known in literature, their NMR spectra are in full accordance with those reported in literature. **1d-g**, **1i-k**, **1m-n**, **1p**, **1s**, **1u** were new compounds.

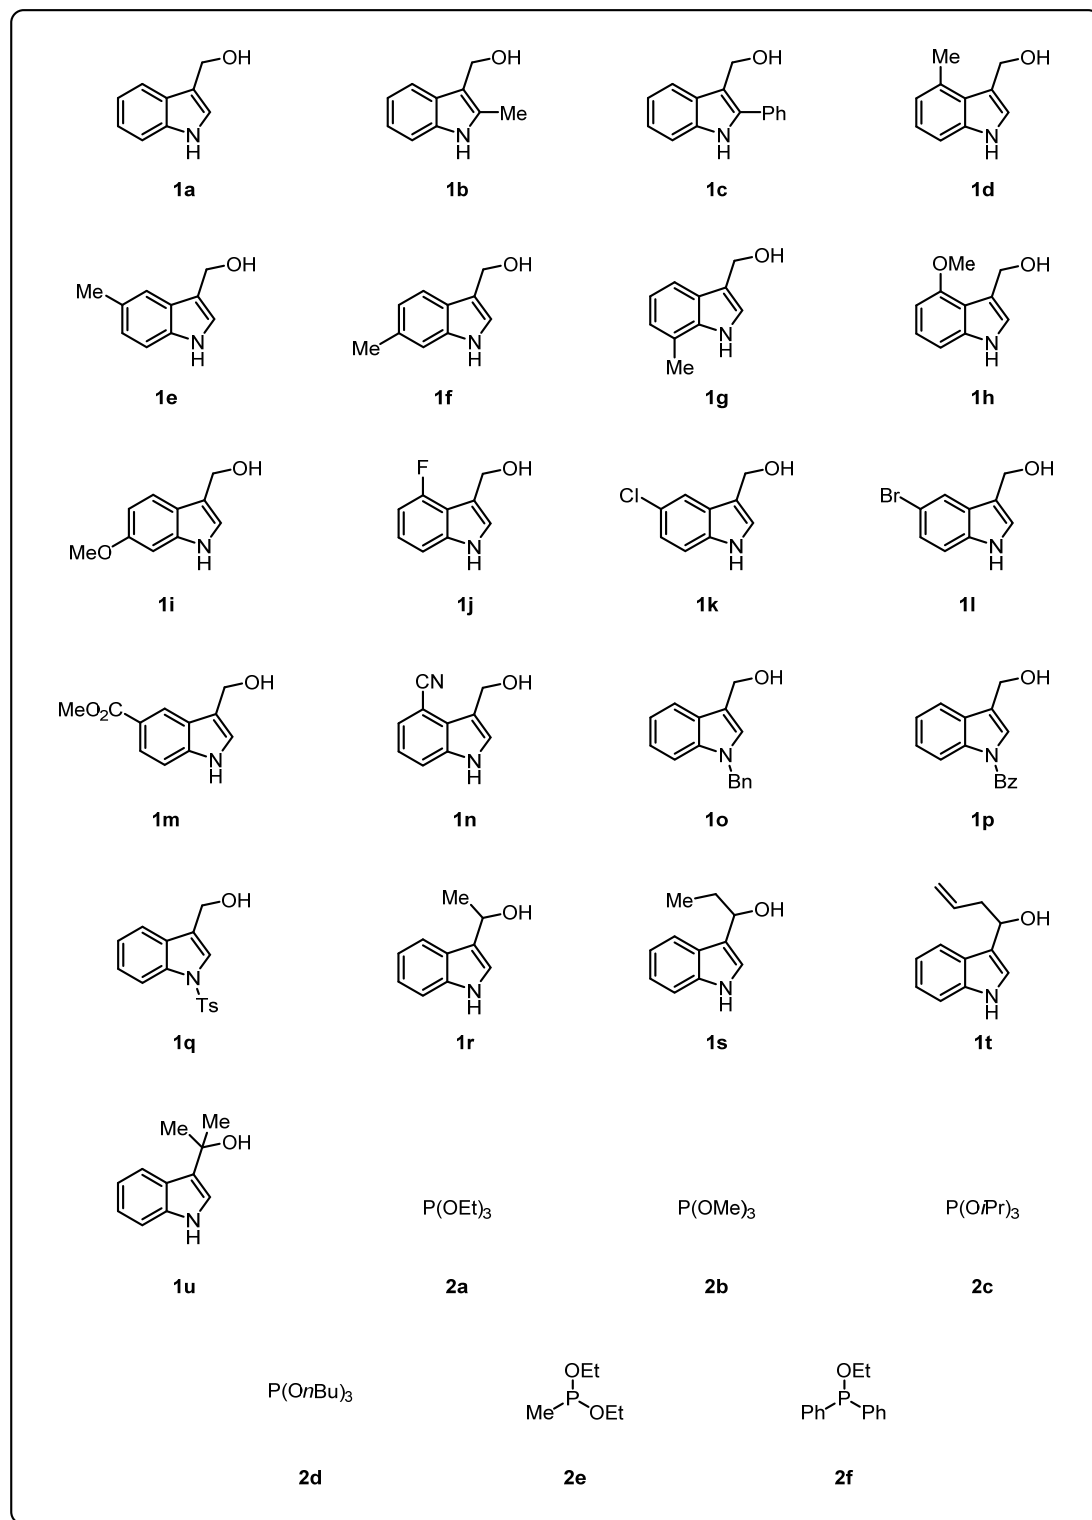

Figure S1: Substrates used in the study.

### General Procedure (GP) 1 and 2 for the synthesis of 1b-1n

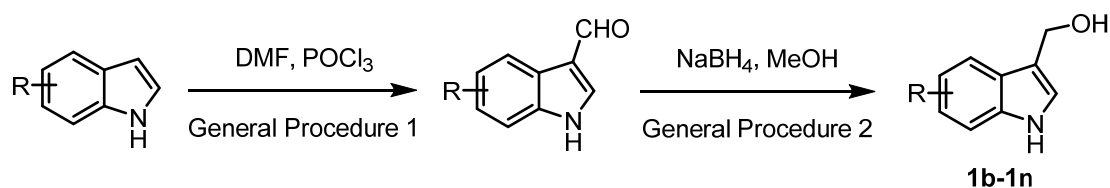

#### GP 1<sup>9</sup>:

In a round-bottomed flask, to a solution DMF (8.8 equiv.) in DCM was added dropwise POCl<sub>3</sub> (1.3 equiv.) at 0 °C. After stirring for 30 min, indole substrate was added dropwise to the reaction mixture at 0 °C. After stirring for 1 h at 35 °C, H<sub>2</sub>O (0.03 equiv.) and 30% NaOH (0.08 equiv.) was added sequentially dropwise to the reaction mixture at 0 °C, and then heated to reflux at 130 °C for 30 min. The crude product was filtered and washed with water, then was purified by silica gel column chromatography to give 3-formyl indole.

#### GP 2<sup>10</sup>:

To a solution of the above-mentioned 3-formyl indole (1 equiv.) in MeOH (0.3 M) was added NaBH<sub>4</sub> (1.1 equiv.) at 0 °C for 30 min. The mixture was quenched by NH<sub>4</sub>Cl and extracted with EtOAc. After concentration in vacuo and the combined organic layer and dried over Na<sub>2</sub>SO<sub>4</sub> and removed under reduced pressure then was purified by silica gel column chromatography to give **1b-1n**.

### General procedure (GP) 3 for the synthesis of 1r-1t

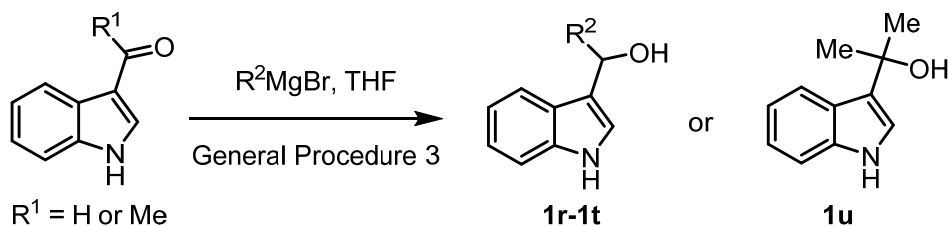

#### GP 3<sup>11</sup>:

Under an argon atmosphere, to a solution of 1H-indole-3-carbaldehyde in dry THF (0.3 M) was added dropwise a solution of R<sup>2</sup>MgBr (3 equiv.) at 0 °C. After stirring for 1 h, the mixture was quenched by H<sub>2</sub>O and extracted with EtOAc, and the organic layer was dried over Na<sub>2</sub>SO<sub>4</sub> and removed under reduced pressure then was purified by silica gel column chromatography to give **1r-1u**.

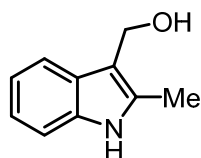

**(2-Methyl-1H-indol-3-yl)methanol (1b)** was prepared according to the GP 1 and 2 as yellow solid in 74% yield (476.6 mg) from 2-methyl-1H-indole substrate (424.0 mg, 4.0 mmol). Melting Point: 112–114 °C.

<sup>1</sup>H NMR (400 MHz, DMSO-*d*<sub>6</sub>) δ 10.82 (s, 1H), 7.18 (dd, *J* = 13.3, 5.2 Hz, 2H), 6.93 (dd, *J* = 14.0, 6.1 Hz, 1H), 6.73 (d, *J* = 7.1 Hz, 1H), 4.69 (s, 2H), 2.65 (s, 3H).

The <sup>1</sup>H NMR spectrum is identical to ref. 1.



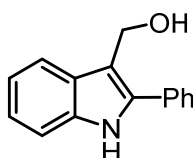

**(2-Phenyl-1H-indol-3-yl)methanol (1c)** was prepared according to the GP 1 and 2 as white solid in 34% yield (591.4 mg) from 2-phenyl-1H-indole substrate (1.5 g, 7.8 mmol).

Melting Point: 223–225 °C.

**<sup>1</sup>H NMR** (400 MHz, DMSO-*d*<sub>6</sub>) δ 11.25 (s, 1H), 7.74 – 7.69 (m, 2H), 7.59 (d, *J* = 7.8 Hz, 1H), 7.41 (t, *J* = 7.7 Hz, 2H), 7.30 (t, *J* = 7.3 Hz, 2H), 7.06 – 6.99 (m, 1H), 6.98 – 6.89 (m, 1H), 4.89 (s, 1H), 4.61 (s, 2H).

The **<sup>1</sup>H NMR** spectrum is identical to ref. 2.

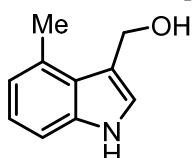

**(4-Methyl-1H-indol-3-yl)methanol (1d)** was prepared according to the GP 1 and 2 as brown solid in 60% yield (966.0 mg) from 4-methyl-1H-indole substrate (1.34 g, 10.0 mmol). Melting Point: 96–99 °C.

**<sup>1</sup>H NMR** (400 MHz, DMSO-*d*<sub>6</sub>) δ 10.81 (s, 1H), 7.19 (d, *J* = 2.4 Hz, 1H), 7.15 (d, *J* = 8.1 Hz, 1H), 6.96 – 6.89 (m, 1H), 6.72 (d, *J* = 7.1 Hz, 1H), 4.68 (s, 3H) (hydroxyl group is included), 2.64 (s, 3H).

**<sup>13</sup>C NMR** (101 MHz, DMSO-*d*<sub>6</sub>) δ 136.9, 130.0, 125.5, 124.1, 121.1, 120.0, 116.5, 109.1, 56.4, 19.6.

**HRMS** (ESI–TOF) *m/z*: calcd. for C<sub>10</sub>H<sub>11</sub>NO [M+H]<sup>+</sup>: 162.0913, found: 162.0915.

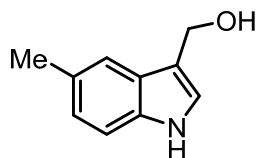

**(5-Methyl-1H-indol-3-yl)methanol (1e)** was prepared according to the GP 1 and 2 as yellow solid in 34% yield (547.4 mg) from 5-methyl-1H-indole substrate (1.34 g, 10.0 mmol).

Melting Point: 97–100 °C.

**<sup>1</sup>H NMR** (400 MHz, DMSO-*d*<sub>6</sub>) δ 10.71 (s, 1H), 7.38 (d, *J* = 0.6 Hz, 1H), 7.23 (d, *J* = 8.2 Hz, 1H), 7.17 (d, *J* = 2.3 Hz, 1H), 6.90 (dd, *J* = 8.3, 1.5 Hz, 1H), 4.68 (s, 1H), 4.62 (s, 2H), 2.38 (s, 3H).

**<sup>13</sup>C NMR** (101 MHz, DMSO-*d*<sub>6</sub>) δ 134.8, 126.9, 126.7, 123.3, 122.6, 118.5, 115.4, 111.0, 55.5, 21.3.

**HRMS** (ESI–TOF) *m/z*: calcd. for C<sub>10</sub>H<sub>11</sub>NO [M+H]<sup>+</sup>: 162.0913, found: 162.0915.

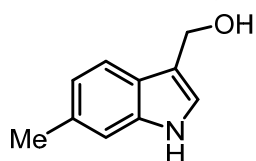

**(6-Methyl-1H-indol-3-yl)methanol (1f)** was prepared according to the GP 1 and 2 as yellow solid in 55% yield (673.0 mg) from 6-methyl-1H-indole substrate (1.0 g, 7.6 mmol).

Melting Point: 85–88 °C.

**<sup>1</sup>H NMR** (400 MHz, DMSO-*d*<sub>6</sub>) δ 10.69 (s, 1H), 7.49 (d, *J* = 8.0 Hz, 1H), 7.15 (s, 2H), 6.83 (dd, *J* = 8.0, 0.9 Hz, 1H), 4.75 – 4.69 (m, 1H), 4.63 (d, *J* = 5.4 Hz, 2H), 2.39 (s, 3H).

**<sup>13</sup>C NMR** (101 MHz, DMSO-*d*<sub>6</sub>) δ 136.9, 129.9, 124.6, 122.6, 120.1, 118.6, 115.8, 111.2, 55.6, 21.4.

**HRMS** (ESI–TOF) *m/z*: calcd. for C<sub>10</sub>H<sub>11</sub>NO [M+Na]<sup>+</sup>: 184.0733, found: 184.0739.

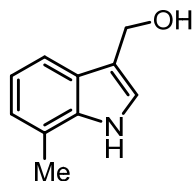

**(7-Methyl-1H-indol-3-yl)methanol (1g)** was prepared according to the GP 1 and 2 as green solid in 97% yield (1.2 g) from 7-methyl-1H-indole substrate (1.0 g, 7.6 mmol).

Melting Point: 100–102 °C.

**<sup>1</sup>H NMR** (400 MHz, DMSO-*d*<sub>6</sub>) δ 10.84 (s, 1H), 7.46 (d, *J* = 7.3 Hz, 1H), 7.24 (d, *J* = 2.3 Hz, 1H), 6.96 – 6.84 (m, 2H), 4.78 – 4.72 (m, 1H), 4.67 (d, *J* = 5.4 Hz, 2H), 2.74 (s, 3H).

**<sup>13</sup>C NMR** (101 MHz, DMSO-*d*<sub>6</sub>) δ 136.0, 126.4, 123.0, 121.5, 120.4, 118.6, 116.6, 116.4, 55.6, 16.8.

**HRMS** (ESI–TOF) *m/z*: calcd. for C<sub>10</sub>H<sub>11</sub>NO [M+Na]<sup>+</sup>: 184.0733, found: 184.0740.

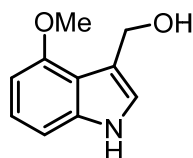

**(4-Methoxy-1H-indol-3-yl)methanol (1h)** was prepared according to the GP 1 and 2 as green liquid in 50% yield (778.8 mg) from 4-methoxy-1H-indole substrate (1.3 g, 8.8 mmol).

**<sup>1</sup>H NMR** (400 MHz, DMSO-*d*<sub>6</sub>) δ 10.84 (s, 1H), 7.12 – 7.06 (m, 1H), 7.01 – 6.91 (m, 2H), 6.44 (dt, *J* = 9.5, 4.7 Hz, 1H), 4.76 (d, *J* = 5.6 Hz, 2H), 4.46 (t, *J* = 5.6 Hz, 1H), 3.83 (s, 3H).

The **<sup>1</sup>H NMR** spectrum is identical to ref. 3.

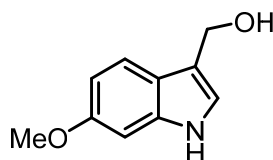

**(6-Methoxy-1H-indol-3-yl)methanol (1i)** was prepared according to the GP 1 and 2 as yellow solid in 48% yield (645.7 mg) from 6-methoxy-1H-indole substrate (1.1 g, 7.6 mmol).

Melting Point: 140–142 °C.

**<sup>1</sup>H NMR** (400 MHz, DMSO-*d*<sub>6</sub>) δ 10.67 (s, 1H), 7.49 (d, *J* = 8.6 Hz, 1H), 7.11 (d, *J* = 2.1 Hz, 1H), 6.88 (d, *J* = 2.2 Hz, 1H), 6.67 (dd, *J* = 8.6, 2.3 Hz, 1H), 4.75 (s, 1H), 4.63 (s, 2H), 3.76 (s, 3H).

**<sup>13</sup>C NMR** (101 MHz, DMSO-*d*<sub>6</sub>) δ 155.6, 137.2, 121.9, 121.1, 119.5, 116.0, 108.6, 94.4, 55.6, 55.1.

**HRMS** (ESI–TOF) *m/z*: calcd. for C<sub>10</sub>H<sub>11</sub>NO<sub>2</sub> [M+Na]<sup>+</sup>: 200.0682, found: 200.0690.

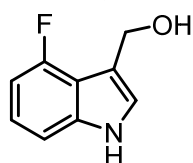

**(4-Fluoro-1H-indol-3-yl)methanol (1j)** was prepared according to the GP 1 and 2 as green solid in 60% yield (732.6 mg) from 4-fluoro-1H-indole substrate (1.0 g, 7.4 mmol).

Melting Point: 94–97 °C.

<sup>1</sup>H NMR (400 MHz, DMSO-*d*<sub>6</sub>) δ 11.18 (s, 1H), 7.26 (d, *J* = 1.1 Hz, 1H), 7.18 (d, *J* = 8.1 Hz, 1H), 7.03 (td, *J* = 7.9, 5.3 Hz, 1H), 6.72 (dd, *J* = 11.1, 7.8 Hz, 1H), 4.79 (s, 1H), 4.70 (s, 2H).

<sup>13</sup>C NMR (101 MHz, DMSO-*d*<sub>6</sub>) δ 156.4 (d, *J*<sub>C-F</sub> = 224.4 Hz), 139.3 (d, *J*<sub>C-F</sub> = 12.4 Hz), 123.9, 121.5 (d, *J*<sub>C-F</sub> = 7.6 Hz), 114.8 (d, *J*<sub>C-F</sub> = 21.2 Hz), 114.5, 107.9 (d, *J*<sub>C-F</sub> = 3.3 Hz), 103.5 (d, *J*<sub>C-F</sub> = 19.2 Hz), 56.0.

<sup>19</sup>F NMR (376 MHz, DMSO-*d*<sub>6</sub>) δ -124.0.

HRMS (ESI-TOF) *m/z*: calcd. for C<sub>9</sub>H<sub>8</sub>FNO [M+Na]<sup>+</sup>: 188.0482, found: 188.0487.

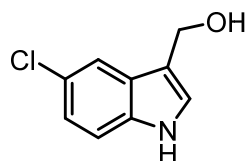

**(5-Chloro-1H-indol-3-yl)methanol (1k)** was prepared according to the GP 1 and 2 as green solid in 74% yield (1.0 g) from 5-chloro-1H-indole substrate (1.1 g, 7.5 mmol).

Melting Point: 102–103 °C.

<sup>1</sup>H NMR (400 MHz, DMSO-*d*<sub>6</sub>) δ 11.07 (s, 1H), 7.64 (d, *J* = 1.9 Hz, 1H), 7.37 (d, *J* = 8.6 Hz, 1H), 7.32 (d, *J* = 2.2 Hz, 1H), 7.08 (dd, *J* = 8.6, 2.0 Hz, 1H), 4.83 (s, 1H), 4.62 (s, 2H).

<sup>13</sup>C NMR (101 MHz, DMSO-*d*<sub>6</sub>) δ 134.9, 127.8, 125.1, 123.1, 120.9, 118.3, 115.9, 112.9, 55.2.

HRMS (ESI-TOF) *m/z*: calcd. for C<sub>9</sub>H<sub>8</sub>ClNO [M+H]<sup>+</sup>: 182.0367, found: 182.0370.

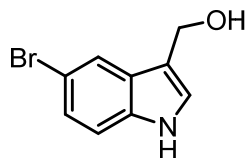

**(5-Bromo-1H-indol-3-yl)methanol (1l)** was prepared according to the GP 1 and 2 as brown solid in 65% yield (263.3 mg) from 5-bromo-1H-indole substrate (352.8 mg, 1.8 mmol).

Melting Point: 124–125 °C.

<sup>1</sup>H NMR (400 MHz, DMSO-*d*<sub>6</sub>) δ 11.08 (s, 1H), 7.79 (s, 1H), 7.40 – 7.25 (m, 2H), 7.19 (d, *J* = 8.0 Hz, 1H), 4.84 (s, 1H), 4.62 (s, 2H).

The <sup>1</sup>H NMR spectrum is identical to ref. 4.

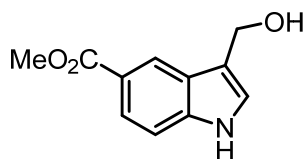

**Methyl 3-(hydroxymethyl)-1H-indole-5-carboxylate (1m)** was prepared according to the GP 1 and 2 as white solid in 25% yield (143.5 mg) from methyl 1H-indole-5-carboxylate substrate (500.0 mg, 2.8 mmol).

Melting Point: 160–161 °C.

<sup>1</sup>H NMR (400 MHz, DMSO-*d*<sub>6</sub>) δ 11.29 (s, 1H), 8.36 (s, 1H), 7.74 (d, *J* = 8.5 Hz, 1H), 7.44 (d, *J* = 8.6 Hz, 1H), 7.37 (s, 1H), 4.92 (s, 1H), 4.68 (s, 2H), 3.85 (s, 3H).

<sup>13</sup>C NMR (101 MHz, DMSO-*d*<sub>6</sub>) δ 167.4, 139.1, 126.3, 125.1, 122.1, 121.8, 119.9, 117.5, 111.3, 55.3, 51.6.

HRMS (ESI-TOF) *m/z*: calcd for C<sub>11</sub>H<sub>11</sub>NO<sub>3</sub> [M+H]<sup>+</sup>: 206.0812, found: 206.0817

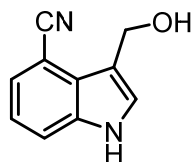

**3-(Hydroxymethyl)-1H-indole-4-carbonitrile (1n)** was prepared according to the GP 1 and 2 as green solid in 22% yield (181.6 mg) from 1H-indole-4-carbonitrile substrate (680.0 mg, 4.8 mmol).

Melting Point: 150–151 °C.

$^1\text{H NMR}$  (400 MHz, DMSO- $d_6$ )  $\delta$  11.55 (s, 1H), 7.72 (d,  $J$  = 8.2 Hz, 1H), 7.55 (s, 1H), 7.48 (d,  $J$  = 7.3 Hz, 1H), 7.21 (t,  $J$  = 7.8 Hz, 1H), 4.85 (s, 2H).

$^{13}\text{C NMR}$  (101 MHz, DMSO- $d_6$ )  $\delta$  136.6, 127.5, 125.5, 125.3, 120.9, 119.3, 116.9, 115.6, 100.6, 54.7.

**HRMS** (ESI-TOF)  $m/z$ : calcd for  $\text{C}_{10}\text{H}_8\text{N}_2\text{O}$   $[\text{M}+\text{H}]^+$ : 173.0709, found: 173.0710.

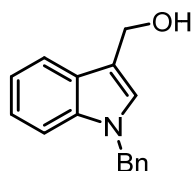

**(1-Benzyl-1H-indol-3-yl)methanol (1o)** was prepared according to the GP 1 and 2 as brown solid in 38% yield (432.3 mg) from 1-benzyl-1H-indole substrate (1.0 g, 4.8 mmol).

Melting Point: 92–94 °C.

$^1\text{H NMR}$  (400 MHz,  $\text{CDCl}_3$ )  $\delta$  7.80 – 7.70 (m, 1H), 7.36 – 7.27 (m, 3H), 7.25 – 7.05 (m, 6H), 5.28 (d,  $J$  = 16.2 Hz, 2H), 4.90 (d,  $J$  = 10.7 Hz, 2H).

The  $^1\text{H NMR}$  spectrum is identical to ref. 5.

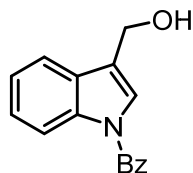

**(3-(Hydroxymethyl)-1H-indol-1-yl)(phenyl)methanone (1p)** was prepared according to the GP 2 as yellow oil in 81% yield (1.4 g) from 1-benzoyl-1H-indole-3-carbaldehyde<sup>12</sup> substrate (1.0 g, 7.0 mmol).

$^1\text{H NMR}$  (400 MHz,  $\text{CDCl}_3$ )  $\delta$  8.26 (d,  $J$  = 7.9 Hz, 1H), 7.62 – 7.45 (m, 4H), 7.38 (t,  $J$  = 6.8 Hz, 2H), 7.25 (dt,  $J$  = 14.0, 6.8 Hz, 2H), 7.14 (d,  $J$  = 7.1 Hz, 1H), 4.68 (s, 2H), 2.11 (s, 1H).

$^{13}\text{C NMR}$  (101 MHz,  $\text{CDCl}_3$ )  $\delta$  168.6, 136.5, 134.3, 131.9, 129.4, 129.0, 128.5, 125.3, 125.0, 123.9, 121.8, 119.2, 116.5, 57.0.

**HRMS** (ESI-TOF)  $m/z$ : calcd for  $\text{C}_{16}\text{H}_{13}\text{NO}_2$   $[\text{M}+\text{Na}]^+$ : 274.0838, found: 274.0846.

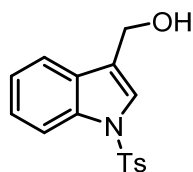

**(1-Tosyl-1H-indol-3-yl)methanol (1q)** was prepared according to the GP 2 as pink solid in 44%

yield (927.1 mg) from 1-tosyl-1H-indole-3-carbaldehyde<sup>13</sup> substrate (1.0 g, 7.0 mmol).

Melting Point: 112–114 °C.

<sup>1</sup>H NMR (400 MHz, CDCl<sub>3</sub>) δ 7.98 (d, *J* = 8.4 Hz, 1H), 7.74 – 7.69 (m, 2H), 7.55 – 7.46 (m, 2H), 7.32 (dd, *J* = 11.4, 4.1 Hz, 1H), 7.18 (dd, *J* = 9.5, 5.2 Hz, 1H), 7.07 (d, *J* = 2.1 Hz, 2H), 4.68 (s, 2H), 2.19 (s, 3H).

The <sup>1</sup>H NMR spectrum is identical to ref. 6.

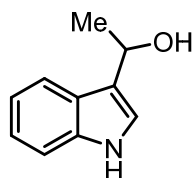

**1-(1H-indol-3-yl)ethan-1-ol (1r)** was prepared according to the GP 3 as green liquid in 65% yield (366.3 mg) from 1H-indole-3-carbaldehyde substrate (507.0 mg, 3.5 mmol) with MeMgBr.

<sup>1</sup>H NMR (400 MHz, CDCl<sub>3</sub>) δ 8.07 (s, 1H), 7.68 (d, *J* = 7.8 Hz, 1H), 7.24 (d, *J* = 8.1 Hz, 1H), 7.13 (dd, *J* = 13.0, 5.2 Hz, 1H), 7.05 (t, *J* = 7.4 Hz, 1H), 6.99 (s, 1H), 5.15 (q, *J* = 6.4 Hz, 1H), 1.88 (s, 1H), 1.58 (d, *J* = 6.5 Hz, 3H).

The <sup>1</sup>H NMR spectrum is identical to ref. 7.

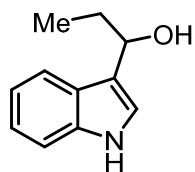

**1-(1H-Indol-3-yl)propan-1-ol (1s)** was prepared according to the GP 3 as green oil in 94% yield (329.0 mg) from 1H-indole-3-carbaldehyde substrate (300.0 mg, 2.0 mmol) with EtMgBr.

<sup>1</sup>H NMR (400 MHz, CDCl<sub>3</sub>) δ 8.08 (s, 1H), 7.67 (d, *J* = 7.8 Hz, 1H), 7.24 (d, *J* = 8.1 Hz, 1H), 7.11 (t, *J* = 7.5 Hz, 1H), 7.04 (t, *J* = 7.4 Hz, 1H), 6.97 (s, 1H), 4.83 (t, *J* = 6.7 Hz, 1H), 1.94 – 1.89 (m, 2H), 0.88 (t, *J* = 7.4 Hz, 3H).

<sup>13</sup>C NMR (101 MHz, CDCl<sub>3</sub>) δ 136.5, 125.7, 122.2, 121.4, 119.6, 119.5, 119.4, 111.3, 69.9, 30.4, 10.5.

**HRMS** (ESI-TOF) *m/z*: calcd for C<sub>11</sub>H<sub>13</sub>NO [M+Na]<sup>+</sup>: 198.0889, found: 198.0892.

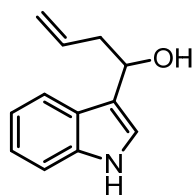

**1-(1H-indol-3-yl)but-3-en-1-ol (1t)** was prepared according to the GP 3 as brown liquid in 37% yield (138.4 mg) from 1H-indole-3-carbaldehyde substrate (300.0 mg, 2.0 mmol) with allylMgBr.

<sup>1</sup>H NMR (400 MHz, CDCl<sub>3</sub>) δ 8.04 (s, 1H), 7.68 (d, *J* = 7.6 Hz, 1H), 7.29 (d, *J* = 8.1 Hz, 1H), 7.19 – 7.10 (m, 1H), 7.10 – 7.03 (m, 2H), 5.90 – 5.75 (m, 1H), 5.12 – 4.99 (m, 2H), 2.67 (dd, *J* = 9.0, 4.3 Hz, 2H), 1.92 (s, 1H).

The <sup>1</sup>H NMR spectrum is identical to ref. 8.

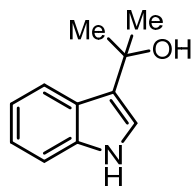

**2-(1H-Indol-3-yl)propan-2-ol (1u)** was prepared according to the GP 3 as gray oil in 83% yield (290.5 mg) from 1-(1H-indol-3-yl)ethan-1-one substrate (318.0 mg, 2.0 mmol) with MeMgBr.

<sup>1</sup>H NMR (400 MHz, CDCl<sub>3</sub>) δ 8.11 (s, 1H), 7.93 (d, *J* = 7.9 Hz, 1H), 7.36 (d, *J* = 8.1 Hz, 1H), 7.19 (dt, *J* = 15.0, 7.2 Hz, 2H), 7.06 (d, *J* = 2.3 Hz, 1H), 2.03 (s, 1H), 1.76 (s, 6H).

<sup>13</sup>C NMR (101 MHz, CDCl<sub>3</sub>) δ 136.9, 125.1, 124.5, 121.9, 121.0, 119.8, 119.4, 111.3, 70.4, 30.9.

HRMS (ESI-TOF) *m/z*: calcd for C<sub>11</sub>H<sub>13</sub>NO [M+Na]<sup>+</sup>: 198.0889, found: 198.0893.

### 3. Scope and generality studies

#### 3.1 Optimization of the reaction conditions<sup>a</sup>

Table S1:

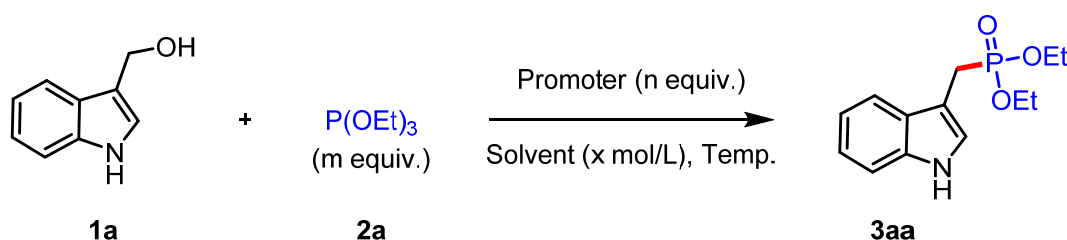

| Entry                             | Promoter | n   | Solvent          | x   | m   | Temp. (°C)   | Yield(%) <sup>b</sup> |
|-----------------------------------|----------|-----|------------------|-----|-----|--------------|-----------------------|
| Screening solvent                 |          |     |                  |     |     |              |                       |
| 1                                 | HFIP     | 2.5 | DMF              | 0.2 | 2.0 | 100          | N.R.                  |
| 2                                 | HFIP     | 2.5 | THF              | 0.2 | 2.0 | 100          | 62                    |
| 3                                 | HFIP     | 2.5 | EtOAc            | 0.2 | 2.0 | 100          | 77                    |
| 4                                 | HFIP     | 2.5 | <i>o</i> -xylene | 0.2 | 2.0 | 100          | 74                    |
| 5                                 | HFIP     | 2.5 | DME              | 0.2 | 2.0 | 100          | N.R.                  |
| 6                                 | HFIP     | 2.5 | <i>o</i> -DCB    | 0.2 | 2.0 | 100          | 75                    |
| 7                                 | HFIP     | 2.5 | DMSO             | 0.2 | 2.0 | 100          | 49                    |
| 8                                 | HFIP     | 2.5 | toluene          | 0.2 | 2.0 | 100          | 85                    |
| Screening concentration (x mol/L) |          |     |                  |     |     |              |                       |
| 9                                 | HFIP     | 2.5 | toluene          | 0.1 | 2.0 | 100          | 80                    |
| 10                                | HFIP     | 2.5 | toluene          | 0.3 | 2.0 | 100          | 88                    |
| 11                                | HFIP     | 2.5 | toluene          | 0.4 | 2.0 | 100          | 91                    |
| 12                                | HFIP     | 2.5 | toluene          | 0.5 | 2.0 | 100          | 89                    |
| Screening temperature             |          |     |                  |     |     |              |                       |
| 13                                | HFIP     | 2.5 | toluene          | 0.4 | 2.0 | 130 (reflux) | 73                    |
| 14                                | HFIP     | 2.5 | toluene          | 0.4 | 2.0 | 90           | 66                    |
| Screening other acid promoters    |          |     |                  |     |     |              |                       |
| 15                                | TFA      | 2.5 | toluene          | 0.4 | 2.0 | 100          | Trace                 |
| 16                                | AcOH     | 2.5 | toluene          | 0.4 | 2.0 | 100          | 22                    |

|                                       |                     |     |         |     |     |     |       |
|---------------------------------------|---------------------|-----|---------|-----|-----|-----|-------|
| 17                                    | PhCO <sub>2</sub> H | 2.5 | toluene | 0.4 | 2.0 | 100 | 40    |
| 18                                    | MsOH                | 2.5 | toluene | 0.4 | 2.0 | 100 | Trace |
| 19                                    | TfOH                | 2.5 | toluene | 0.4 | 2.0 | 100 | Trace |
| 20                                    | TsOH                | 2.5 | toluene | 0.4 | 2.0 | 100 | Trace |
| 21                                    | CSA                 | 2.5 | toluene | 0.4 | 2.0 | 100 | Trace |
| 22                                    | HCl                 | 2.5 | toluene | 0.4 | 2.0 | 100 | N.R.  |
| 23                                    | HI                  | 2.5 | toluene | 0.4 | 2.0 | 100 | Trace |
| Screening HFIP equivalence (n)        |                     |     |         |     |     |     |       |
| 24                                    | HFIP                | 1.0 | toluene | 0.4 | 2.0 | 100 | 78    |
| 25                                    | HFIP                | 2.5 | toluene | 0.4 | 2.0 | 100 | 89    |
| 26                                    | HFIP                | 3.0 | toluene | 0.4 | 2.0 | 100 | 69    |
| Screening <b>2a</b> stoichiometry (m) |                     |     |         |     |     |     |       |
| 27                                    | HFIP                | 2.5 | toluene | 0.4 | 1.0 | 100 | 50    |
| 28                                    | HFIP                | 2.5 | toluene | 0.4 | 1.5 | 100 | 66    |
| 29                                    | HFIP                | 2.5 | toluene | 0.4 | 2.5 | 100 | 88    |
| 30                                    | HFIP                | 2.5 | toluene | 0.4 | 3.0 | 100 | 85    |

<sup>a</sup>Reaction conditions: **1a** (0.2 mmol) and **2a** (m equiv.) were dissolved in solvent, promoter (n equiv.) was added, and the mixture was heated and monitored by TLC until full consumption of **1a**. <sup>b</sup>Isolated yield. N.R. = no reaction.

### 3.2 Scope study

Standard conditions of the HFIP-promoted phosphorylation reaction using **3aa** as an example from substrates **1a** and **2a**

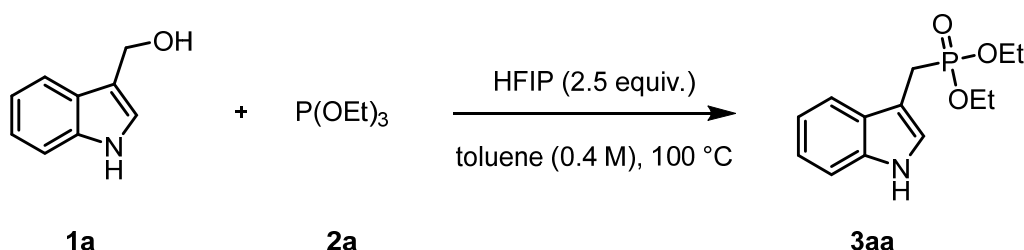

To a solution of HFIP (84 mg, 2.5 equiv.) in toluene (0.5 mL, 0.4 M) was added **1a** (29.4 mg, 0.2 mmol) and **2a** (69.6 mg, 2 equiv.). Then the mixture was stirred at 100 °C about 20 h, and monitored by TLC. The crude mixture was purified by column chromatography on silica gel (PE/EtOAc = 1:1-1:5) to get product **3aa**.

All the phosphonate products are prepared according to the above-mentioned standard conditions. The reactions were monitored by thin-layer chromatography (TLC) to reach the full consumption of indole substrates.

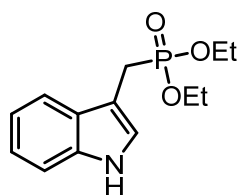

**Diethyl ((1H-indol-3-yl)methyl)phosphonate (3aa)** was prepared according to the standard conditions as brown solid in 91% yield (51.1 mg) from substrate **1a** (29.4 mg, 0.2 mmol) for 17 h.

Melting Point: 54–56 °C.

**<sup>1</sup>H NMR** (400 MHz, CDCl<sub>3</sub>) δ 9.36 (s, 1H), 7.62 (d, *J* = 7.7 Hz, 1H), 7.32 (d, *J* = 7.9 Hz, 1H), 7.19 – 7.08 (m, 2H), 7.00 (s, 1H), 4.12 – 3.91 (m, 4H), 3.31 (d, *J* = 20.0 Hz, 2H), 1.23 (t, *J* = 7.1 Hz, 6H).

**<sup>13</sup>C NMR** (101 MHz, CDCl<sub>3</sub>) δ 136.1, 127.3 (d, *J*<sub>C-P</sub> = 5.8 Hz), 124.1 (d, *J*<sub>C-P</sub> = 7.6 Hz), 121.6, 119.1, 118.6, 111.4, 104.0, 62.1 (d, *J*<sub>C-P</sub> = 6.9 Hz), 23.0 (d, *J*<sub>C-P</sub> = 143.6 Hz), 16.3 (d, *J*<sub>C-P</sub> = 6.0 Hz).

**<sup>31</sup>P NMR** (162 MHz, CDCl<sub>3</sub>) δ 28.1.

The NMR spectra of **3aa** are identical to ref. 14

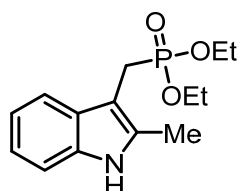

**Diethyl ((2-methyl-1H-indol-3-yl)methyl)phosphonate (3ba)** was prepared according to the standard conditions as yellow solid in 82% yield (46.0 mg) from substrate **1b** (32.3 mg, 0.2 mmol) for 15 h.

Melting Point: 115–116 °C.

**<sup>1</sup>H NMR** (400 MHz, CDCl<sub>3</sub>) δ 8.62 (d, *J* = 21.9 Hz, 1H), 7.56 – 7.50 (m, 1H), 7.24 – 7.18 (m, 1H), 7.11 – 7.02 (m, 2H), 4.10 – 3.86 (m, 4H), 3.23 (d, *J* = 19.5 Hz, 2H), 2.27 (t, *J* = 3.7 Hz, 3H), 1.21 (t, *J* = 7.1 Hz, 6H).

**<sup>13</sup>C NMR** (101 MHz, CDCl<sub>3</sub>) δ 135.2, 133.3, 128.4, 120.8, 118.6 (d, *J*<sub>C-P</sub> = 99.6 Hz), 118.1, 110.3, 100.0, 61.9 (d, *J*<sub>C-P</sub> = 6.9 Hz), 22.7 (d, *J*<sub>C-P</sub> = 144.8 Hz), 16.4 (d, *J*<sub>C-P</sub> = 6.0 Hz), 11.6.

**<sup>31</sup>P NMR** (162 MHz, CDCl<sub>3</sub>) δ 27.7.

**HRMS** (ESI–TOF) *m/z*: calcd for C<sub>14</sub>H<sub>20</sub>NO<sub>3</sub>P [M+H]<sup>+</sup>: 282.1254, found: 282.1260.

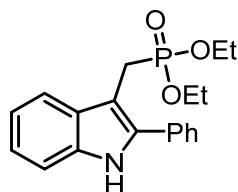

**Diethyl ((2-phenyl-1H-indol-3-yl)methyl)phosphonate (3ca)** was prepared according to the standard conditions as green solid in 77% yield (52.5 mg) from substrate **1c** (44.6 mg, 0.2 mmol) for 22 h.

Melting Point: 126–127 °C.

**<sup>1</sup>H NMR** (400 MHz, CDCl<sub>3</sub>) δ 8.73 (d, *J* = 29.2 Hz, 1H), 7.77 (d, *J* = 7.6 Hz, 3H), 7.43 (t, *J* = 6.8 Hz, 2H), 7.35 (t, *J* = 7.4 Hz, 2H), 7.16 (dt, *J* = 18.9, 7.1 Hz, 2H), 4.09 – 3.82 (m, 4H), 3.41 (d, *J* = 20.3 Hz, 2H), 1.19 (t, *J* = 7.0 Hz, 6H).

**<sup>13</sup>C NMR** (101 MHz, CDCl<sub>3</sub>) δ 136.3, 135.8, 132.5, 128.8, 128.3, 127.8, 122.3, 120.0, 119.6, 110.8, 102.4, 99.9, 62.0 (d, *J*<sub>C-P</sub> = 6.8 Hz), 23.6 (d, *J*<sub>C-P</sub> = 145.4 Hz), 16.3 (d, *J*<sub>C-P</sub> = 6.1 Hz).

**<sup>31</sup>P NMR** (162 MHz, CDCl<sub>3</sub>) δ 27.5.

**HRMS** (ESI–TOF) *m/z*: calcd for C<sub>19</sub>H<sub>22</sub>NO<sub>3</sub>P [M+H]<sup>+</sup>: 344.1410, found: 344.1419.



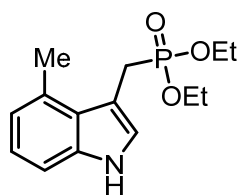

**Diethyl ((4-methyl-1H-indol-3-yl)methyl)phosphonate (3da)** was prepared according to the standard conditions as brown solid in 80% yield (44.9 mg) from substrate **1d** (32.3 mg, 0.2 mmol) for 24 h.

Melting Point: 148–150 °C.

**<sup>1</sup>H NMR** (400 MHz, CDCl<sub>3</sub>) δ 9.38 (s, 1H), 7.19 (d, *J* = 8.1 Hz, 1H), 7.10 (s, 1H), 7.02 (t, *J* = 7.6 Hz, 1H), 6.81 (d, *J* = 7.0 Hz, 1H), 4.10 – 3.91 (m, 4H), 3.53 (d, *J* = 20.4 Hz, 2H), 2.75 (s, 3H), 1.21 (t, *J* = 7.1 Hz, 6H).

**<sup>13</sup>C NMR** (101 MHz, CDCl<sub>3</sub>) δ 136.4, 130.2, 125.6 (d, *J*<sub>C-P</sub> = 6.0 Hz), 124.5 (d, *J*<sub>C-P</sub> = 7.2 Hz), 121.7, 121.1, 109.6, 104.2, 62.1 (d, *J*<sub>C-P</sub> = 7.0 Hz), 24.7 (d, *J*<sub>C-P</sub> = 142.4 Hz), 20.2, 16.3 (d, *J*<sub>C-P</sub> = 5.9 Hz).

**<sup>31</sup>P NMR** (162 MHz, CDCl<sub>3</sub>) δ 27.9.

**HRMS** (ESI–TOF) *m/z*: calcd for C<sub>14</sub>H<sub>20</sub>NO<sub>3</sub>P [M+H]<sup>+</sup>: 282.1254, found: 282.1260.

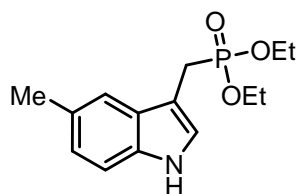

**Diethyl ((5-methyl-1H-indol-3-yl)methyl)phosphonate (3ea)** was prepared according to the standard conditions as brown oil in 76% yield (42.7 mg) from substrate **1e** (32.3 mg, 0.2 mmol) for 14 h.

**<sup>1</sup>H NMR** (400 MHz, CDCl<sub>3</sub>) δ 8.97 (s, 1H), 7.40 (s, 1H), 7.22 (d, *J* = 8.3 Hz, 1H), 7.00 (dd, *J* = 9.5, 5.6 Hz, 2H), 4.12 – 3.93 (m, 4H), 3.28 (d, *J* = 20.0 Hz, 2H), 2.45 (s, 3H), 1.23 (t, *J* = 7.1 Hz, 6H).

The **<sup>1</sup>H NMR** spectrum is identical to ref. 15.

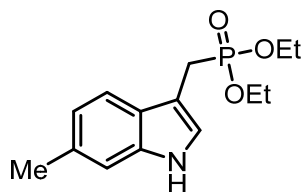

**Diethyl ((6-methyl-1H-indol-3-yl)methyl)phosphonate (3fa)** was prepared according to the standard conditions as yellow oil in 80% yield (44.8 mg) from substrate **1f** (32.3 mg, 0.2 mmol) for 29 h.

**<sup>1</sup>H NMR** (400 MHz, CDCl<sub>3</sub>) δ 8.82 (s, 1H), 7.49 (d, *J* = 8.1 Hz, 1H), 7.12 (s, 1H), 7.00 (s, 1H), 6.94 (d, *J* = 8.1 Hz, 1H), 4.10 – 3.93 (m, 4H), 3.28 (d, *J* = 20.1 Hz, 2H), 2.43 (s, 3H), 1.23 (t, *J* = 7.0 Hz, 6H).

**<sup>13</sup>C NMR** (101 MHz, CDCl<sub>3</sub>) δ 136.5, 131.5, 125.3, 123.2 (d, *J*<sub>C-P</sub> = 7.5 Hz), 121.1, 118.3, 111.2, 104.1, 62.0 (d, *J*<sub>C-P</sub> = 6.8 Hz), 23.1 (d, *J*<sub>C-P</sub> = 143.4 Hz), 21.6, 16.4 (d, *J*<sub>C-P</sub> = 6.0 Hz).

**<sup>31</sup>P NMR** (162 MHz, CDCl<sub>3</sub>) δ 27.9.

**HRMS** (ESI–TOF) *m/z*: calcd for C<sub>14</sub>H<sub>20</sub>NO<sub>3</sub>P [M+H]<sup>+</sup>: 282.1254, found: 282.1261.

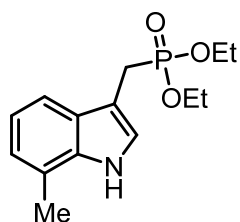

**Diethyl ((7-methyl-1H-indol-3-yl)methyl)phosphonate (3ga)** was prepared according to the standard conditions as yellow solid in 81% yield (45.8 mg) from substrate **1g** (32.3 mg, 0.2 mmol) for 29 h.

Melting Point: 111–113 °C.

**<sup>1</sup>H NMR** (400 MHz, CDCl<sub>3</sub>) δ 9.28 (s, 1H), 7.47 (d, *J* = 7.8 Hz, 1H), 7.10 – 7.02 (m, 2H), 6.97 (d, *J* = 7.0 Hz, 1H), 4.11 – 3.93 (m, 4H), 3.31 (d, *J* = 20.1 Hz, 2H), 2.48 (s, 3H), 1.24 (t, *J* = 7.1 Hz, 6H).

**<sup>13</sup>C NMR** (101 MHz, CDCl<sub>3</sub>) δ 135.7, 126.9 (d, *J*<sub>C-P</sub> = 6.1 Hz), 123.9 (d, *J*<sub>C-P</sub> = 7.5 Hz), 122.2, 120.7, 119.4, 116.2, 104.4 (d, *J*<sub>C-P</sub> = 9.3 Hz), 62.0 (d, *J*<sub>C-P</sub> = 6.9 Hz), 23.0 (d, *J*<sub>C-P</sub> = 144.4 Hz), 16.5, 16.3 (d, *J*<sub>C-P</sub> = 5.9 Hz).

**<sup>31</sup>P NMR** (162 MHz, CDCl<sub>3</sub>) δ 28.0.

**HRMS** (ESI–TOF) *m/z*: calcd for C<sub>14</sub>H<sub>20</sub>NO<sub>3</sub>P [M+H]<sup>+</sup>: 282.1254, found: 282.1260.

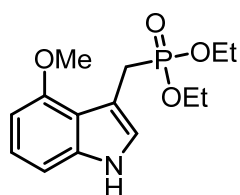

**Diethyl ((4-methoxy-1H-indol-3-yl)methyl)phosphonate (3ha)** was prepared according to the standard conditions as brown solid in 99% yield (60.4 mg) from substrate **1h** (35.4 mg, 0.2 mmol) for 28 h.

Melting Point: 131–132 °C.

**<sup>1</sup>H NMR** (400 MHz, CDCl<sub>3</sub>) δ 8.96 (s, 1H), 7.07 (s, 1H), 7.03 (d, *J* = 7.9 Hz, 1H), 6.95 (d, *J* = 7.8 Hz, 1H), 6.46 (d, *J* = 7.7 Hz, 1H), 4.10 – 3.97 (m, 4H), 3.90 (s, 3H), 3.66 (d, *J* = 20.4 Hz, 2H), 1.21 (t, *J* = 7.1 Hz, 6H).

**<sup>13</sup>C NMR** (101 MHz, CDCl<sub>3</sub>) δ 154.5, 137.4, 122.6 (d, *J*<sub>C-P</sub> = 6.5 Hz), 122.3, 117.1 (d, *J*<sub>C-P</sub> = 7.1 Hz), 104.8, 104.1, 99.1, 61.7 (d, *J*<sub>C-P</sub> = 6.7 Hz), 54.8, 23.5 (d, *J*<sub>C-P</sub> = 140.4 Hz), 16.2 (d, *J*<sub>C-P</sub> = 6.1 Hz).

**<sup>31</sup>P NMR** (162 MHz, CDCl<sub>3</sub>) δ 29.0.

**HRMS** (ESI–TOF) *m/z*: calcd for C<sub>14</sub>H<sub>20</sub>NO<sub>4</sub>P [M+H]<sup>+</sup>: 298.1203, found: 298.1211.

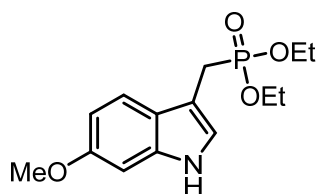

**Diethyl ((6-methoxy-1H-indol-3-yl)methyl)phosphonate (3ia)** was prepared according to the standard conditions as black solid in 99% yield (61.2 mg) from substrate **1i** (35.4 mg, 0.2 mmol) for 28 h.

Melting Point: 120–122 °C.

**<sup>1</sup>H NMR** (400 MHz, CDCl<sub>3</sub>) δ 8.96 (s, 1H), 7.47 (d, *J* = 8.6 Hz, 1H), 6.91 (s, 1H), 6.83 – 6.74 (m, 2H), 4.09 – 3.93 (m, 4H), 3.79 (s, 3H), 3.26 (d, *J* = 20.1 Hz, 2H), 1.23 (t, *J* = 7.1 Hz, 6H).  
**<sup>13</sup>C NMR** (101 MHz, CDCl<sub>3</sub>) δ 156.3, 136.8, 122.7 (d, *J*<sub>C-P</sub> = 8.2 Hz), 121.8 (d, *J*<sub>C-P</sub> = 5.6 Hz), 119.3, 109.4, 104.0, 94.6, 62.1 (d, *J*<sub>C-P</sub> = 6.8 Hz), 55.5, 23.1 (d, *J*<sub>C-P</sub> = 144.4 Hz), 16.4 (d, *J*<sub>C-P</sub> = 5.9 Hz).

**<sup>31</sup>P NMR** (162 MHz, CDCl<sub>3</sub>) δ 28.1.

**HRMS** (ESI-TOF) *m/z*: calcd for C<sub>14</sub>H<sub>20</sub>NO<sub>4</sub>P [M+H]<sup>+</sup>: 298.1203, found: 298.1209.

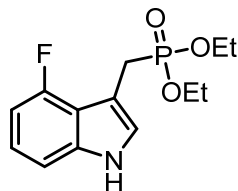

**Diethyl ((4-fluoro-1H-indol-3-yl)methyl)phosphonate (3ja)** was prepared according to the standard conditions as brown oil in 98% yield (55.9 mg) from substrate **1j** (33 mg, 0.2 mmol) for 26 h.

**<sup>1</sup>H NMR** (400 MHz, CDCl<sub>3</sub>) δ 9.66 (s, 1H), 7.10 (d, *J* = 8.1 Hz, 1H), 7.01 (q, *J* = 8.2 Hz, 2H), 6.70 (dd, *J* = 11.2, 7.9 Hz, 1H), 4.11 – 3.97 (m, 4H), 3.47 (d, *J* = 20.3 Hz, 2H), 1.23 (t, *J* = 7.0 Hz, 6H).

**<sup>13</sup>C NMR** (101 MHz, CDCl<sub>3</sub>) δ 158.2, 155.8, 138.8 (d, *J*<sub>C-F</sub> = 11.1 Hz), 124.4 (d, *J*<sub>C-F</sub> = 7.1 Hz), 122.0 (d, *J*<sub>C-F</sub> = 7.9 Hz), 107.7 (d, *J*<sub>C-F</sub> = 3.5 Hz), 104.2 (d, *J*<sub>C-F</sub> = 19.4 Hz), 102.1 (d, *J*<sub>C-P</sub> = 9.8 Hz), 62.1 (d, *J*<sub>C-P</sub> = 6.9 Hz), 23.5 (d, *J*<sub>C-P</sub> = 140.4 Hz), 16.3 (d, *J*<sub>C-P</sub> = 6.0 Hz).

**<sup>31</sup>P NMR** (162 MHz, CDCl<sub>3</sub>) δ 28.0.

**<sup>19</sup>F NMR** (376 MHz, CDCl<sub>3</sub>) δ -125.7.

**HRMS** (ESI-TOF) *m/z*: calcd for C<sub>13</sub>H<sub>17</sub>FNO<sub>3</sub>P [M+H]<sup>+</sup>: 286.1003, found: 286.1007.

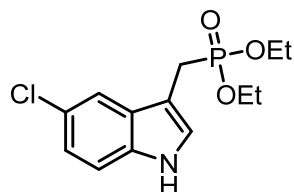

**Diethyl ((5-chloro-1H-indol-3-yl)methyl)phosphonate (3ka)** was prepared according to the standard conditions as yellow solid in 99% yield (63.2 mg) from substrate **1k** (36.2 mg, 0.2 mmol) for 26 h.

Melting Point: 71–73 °C.

**<sup>1</sup>H NMR** (400 MHz, CDCl<sub>3</sub>) δ 9.61 (s, 1H), 7.57 (s, 1H), 7.19 (d, *J* = 8.6 Hz, 1H), 7.06 (d, *J* = 8.6 Hz, 1H), 6.89 (s, 1H), 4.13 – 3.94 (m, 4H), 3.23 (d, *J* = 19.9 Hz, 2H), 1.26 (t, *J* = 7.0 Hz, 6H).

The **<sup>1</sup>H NMR** spectrum is identical to ref. 15.

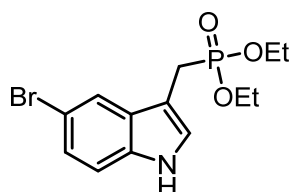

**Diethyl ((5-bromo-1H-indol-3-yl)methyl)phosphonate (3la)** was prepared according to the standard conditions as yellow oil in 74% yield (51.1 mg) from substrate **1l** (45.0 mg, 0.2 mmol)

for 20 h.

**<sup>1</sup>H NMR** (400 MHz, CDCl<sub>3</sub>) δ 9.38 (s, 1H), 7.74 (s, 1H), 7.19 (dt, *J* = 15.3, 5.1 Hz, 2H), 6.92 (s, 1H), 4.12 – 3.96 (m, 4H), 3.23 (d, *J* = 20.0 Hz, 2H), 1.27 – 1.24 (t, 8H) (grease peak is included).

**<sup>13</sup>C NMR** (101 MHz, CDCl<sub>3</sub>) δ 134.8, 129.0, 125.3, 124.6, 121.4, 112.9, 112.5, 103.9, 62.2 (d, *J*<sub>C-P</sub> = 7.0 Hz), 23.1 (d, *J*<sub>C-P</sub> = 145.4 Hz), 16.4 (d, *J*<sub>C-P</sub> = 6.1 Hz).

**<sup>31</sup>P NMR** (162 MHz, CDCl<sub>3</sub>) δ 27.6.

**HRMS** (ESI–TOF) *m/z*: calcd for C<sub>13</sub>H<sub>17</sub>BrNO<sub>3</sub>P [M+Na]<sup>+</sup>: 368.0022, found: 368.0031.

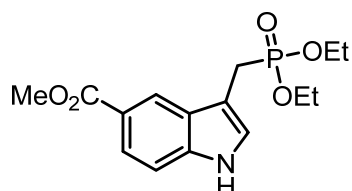

**Methyl 3-((diethoxyphosphoryl)methyl)-1H-indole-5-carboxylate (3ma)** was prepared according to the standard conditions as yellow solid in 99% yield (64.7 mg) from substrate **1m** (41.0 mg, 0.2 mmol) for 24 h.

Melting Point: 102–104 °C.

**<sup>1</sup>H NMR** (400 MHz, CDCl<sub>3</sub>) δ 9.99 (s, 1H), 8.32 (s, 1H), 7.74 (dd, *J* = 8.6, 1.4 Hz, 1H), 7.21 (s, 1H), 6.88 (d, *J* = 2.5 Hz, 1H), 4.03 – 3.90 (m, 4H), 3.84 (s, 3H), 3.23 (d, *J* = 20.1 Hz, 2H), 1.17 (t, *J* = 7.1 Hz, 6H).

**<sup>13</sup>C NMR** (101 MHz, CDCl<sub>3</sub>) δ 168.2, 138.7, 126.9, 125.5, 123.1, 121.9, 121.3, 111.1, 105.7, 62.2 (d, *J*<sub>C-P</sub> = 6.7 Hz), 51.8, 23.0 (d, *J*<sub>C-P</sub> = 144.4 Hz), 16.3 (d, *J*<sub>C-P</sub> = 6.0 Hz).

**<sup>31</sup>P NMR** (162 MHz, CDCl<sub>3</sub>) δ 27.7.

**HRMS** (ESI–TOF) *m/z*: calcd for C<sub>15</sub>H<sub>20</sub>NO<sub>5</sub>P [M+Na]<sup>+</sup>: 348.0971, found: 348.0978.

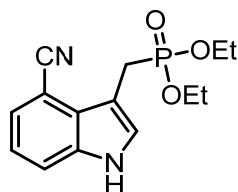

**Diethyl ((4-cyano-1H-indol-3-yl)methyl)phosphonate (3na)** was prepared according to the standard conditions as green solid in 64% yield (37.3 mg) from substrate **1n** (34.4 mg, 0.2 mmol) for 26 h.

Melting Point: 159–161 °C.

**<sup>1</sup>H NMR** (400 MHz, CDCl<sub>3</sub>) δ 10.40 (s, 1H), 7.51 (d, *J* = 8.2 Hz, 1H), 7.40 (d, *J* = 7.3 Hz, 1H), 7.14 (s, 1H), 7.09 (t, *J* = 7.8 Hz, 1H), 4.18 – 4.04 (m, 4H), 3.63 (d, *J* = 20.0 Hz, 2H), 1.26 (t, 8H) (grease peak is included).

**<sup>13</sup>C NMR** (101 MHz, CDCl<sub>3</sub>) δ 136.3, 127.7 (d, *J*<sub>C-P</sub> = 6.4 Hz), 126.3, 126.2, 121.0, 119.4, 116.7, 103.8, 101.3, 62.5 (d, *J*<sub>C-P</sub> = 7.0 Hz), 21.9 (d, *J*<sub>C-P</sub> = 142.4 Hz), 16.3 (d, *J*<sub>C-P</sub> = 6.0 Hz).

**<sup>31</sup>P NMR** (162 MHz, CDCl<sub>3</sub>) δ 27.5.

**HRMS** (ESI–TOF) *m/z*: calcd for C<sub>14</sub>H<sub>17</sub>N<sub>2</sub>O<sub>3</sub>P [M+H]<sup>+</sup>: 293.1050, found: 293.1054.

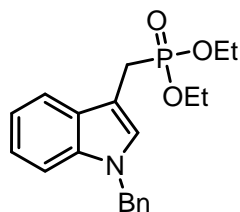

**Diethyl ((1-benzyl-1H-indol-3-yl)methyl)phosphonate (30a)** was prepared according to the standard conditions as brown solid in 68% yield (48.6 mg) from substrate **1o** (47.4 mg, 0.2 mmol) for 22 h.

Melting Point: 66–68 °C.

<sup>1</sup>H NMR (400 MHz, CDCl<sub>3</sub>) δ 7.56 (d, *J* = 7.6 Hz, 1H), 7.09 (ddd, *J* = 22.5, 20.6, 6.2 Hz, 9H), 5.20 (s, 2H), 4.00 – 3.82 (m, 4H), 3.22 (d, *J* = 20.3 Hz, 2H), 1.12 (t, *J* = 7.0 Hz, 6H).

The <sup>1</sup>H NMR spectrum is identical to ref. 15.

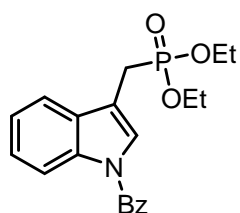

**Diethyl ((1-benzoyl-1H-indol-3-yl)methyl)phosphonate (3pa)** was prepared according to the standard conditions as yellow oil in 52% yield (38.4 mg) from substrate **1p** (50.4 mg, 0.2 mmol) for 17 h.

<sup>1</sup>H NMR (400 MHz, CDCl<sub>3</sub>) δ 8.40 (d, *J* = 8.1 Hz, 1H), 7.73 (d, *J* = 7.2 Hz, 2H), 7.61 (dd, *J* = 13.2, 7.4 Hz, 2H), 7.52 (t, *J* = 7.5 Hz, 2H), 7.43 – 7.32 (m, 3H), 4.09 – 3.96 (m, 4H), 3.20 (d, *J* = 21.1 Hz, 2H), 1.22 (t, *J* = 7.1 Hz, 6H).

<sup>13</sup>C NMR (101 MHz, CDCl<sub>3</sub>) δ 168.4, 136.0, 134.5, 131.9, 130.6, 129.1, 128.6, 126.3 (d, *J*<sub>C-P</sub> = 9.0 Hz), 125.3, 123.8, 119.1, 116.4, 111.9 (d, *J*<sub>C-P</sub> = 9.9 Hz), 62.2 (d, *J*<sub>C-P</sub> = 6.8 Hz), 22.9 (d, *J*<sub>C-P</sub> = 144.4 Hz), 16.3 (d, *J*<sub>C-P</sub> = 5.9 Hz).

<sup>31</sup>P NMR (162 MHz, CDCl<sub>3</sub>) δ 26.0.

HRMS (ESI-TOF) *m/z*: calcd for C<sub>20</sub>H<sub>22</sub>NO<sub>4</sub>P [M+H]<sup>+</sup>: 372.1359, found: 372.1364.

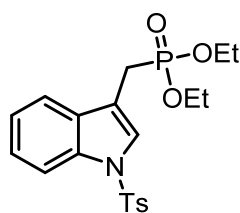

**Diethyl ((1-tosyl-1H-indol-3-yl)methyl)phosphonate (3qa)** was prepared according to the standard conditions as yellow oil in 58% yield (48.8 mg) from substrate **1q** (60.2 mg, 0.2 mmol) for 17 h.

<sup>1</sup>H NMR (400 MHz, CDCl<sub>3</sub>) δ 7.91 (d, *J* = 8.2 Hz, 1H), 7.67 (d, *J* = 8.2 Hz, 2H), 7.51 – 7.45 (m, 2H), 7.24 (t, *J* = 7.6 Hz, 1H), 7.21 – 7.14 (m, 1H), 7.11 (d, *J* = 8.1 Hz, 2H), 3.99 – 3.80 (m, 4H), 3.12 (d, *J* = 20.9 Hz, 2H), 2.24 (s, 3H), 1.10 (t, *J* = 7.0 Hz, 6H).

The <sup>1</sup>H NMR spectrum is identical to ref. 16.

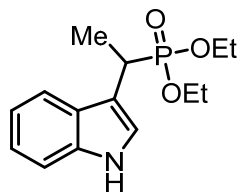

**Diethyl (1-(1H-indol-3-yl)ethyl)phosphonate (3ra)** was prepared according to the standard conditions as brown oil in 77% yield (43.1 mg) from substrate **1r** (32.2 mg, 0.2 mmol) for 17 h.

**<sup>1</sup>H NMR** (400 MHz, CDCl<sub>3</sub>) δ 9.33 – 8.94 (m, 1H), 7.66 (d, *J* = 7.8 Hz, 1H), 7.35 (d, *J* = 8.0 Hz, 1H), 7.19 – 7.08 (m, 2H), 7.05 (s, 1H), 4.18 – 4.05 (m, 2H), 3.93 – 3.84 (m, 1H), 3.71 – 3.61 (m, 1H), 3.58 – 3.47 (m, 1H), 1.63 (dd, *J* = 18.2, 7.4 Hz, 3H), 1.32 (t, *J* = 7.1 Hz, 3H), 1.04 (t, *J* = 7.1 Hz, 3H).

**<sup>13</sup>C NMR** (101 MHz, CDCl<sub>3</sub>) δ 136.0, 126.9, 126.8, 123.2, 121.8, 119.1, 119.0, 111.4, 62.5 (d, *J*<sub>C-P</sub> = 7.0 Hz), 61.8 (d, *J*<sub>C-P</sub> = 7.5 Hz), 29.1 (d, *J*<sub>C-P</sub> = 143.4 Hz), 16.5 (d, *J*<sub>C-P</sub> = 5.9 Hz), 16.3 (d, *J*<sub>C-P</sub> = 5.6 Hz), 15.8 (d, *J*<sub>C-P</sub> = 3.8 Hz).

**<sup>31</sup>P NMR** (162 MHz, CDCl<sub>3</sub>) δ 31.3.

**HRMS** (ESI-TOF) *m/z*: calcd for C<sub>14</sub>H<sub>20</sub>NO<sub>3</sub>P [M+H]<sup>+</sup>: 282.1254, found: 282.1261.

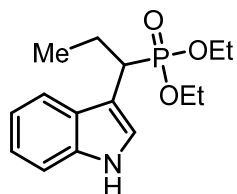

**Diethyl (1-(1H-indol-3-yl)propyl)phosphonate (3sa)** was prepared according to the standard conditions as green oil in 78% yield (46.1 mg) from substrate **1s** (35.0 mg, 0.2 mmol) for 22 h.

**<sup>1</sup>H NMR** (400 MHz, CDCl<sub>3</sub>) δ 9.14 (s, 1H), 7.64 (d, *J* = 7.8 Hz, 1H), 7.35 (d, *J* = 8.0 Hz, 1H), 7.16 (t, *J* = 7.4 Hz, 1H), 7.14 – 7.07 (m, 2H), 4.18 – 4.04 (m, 2H), 3.91 – 3.80 (m, 1H), 3.66 – 3.55 (m, 1H), 3.32 – 3.23 (m, 1H), 2.26 – 2.17 (m, 1H), 2.05 – 1.94 (m, 1H), 1.31 (t, *J* = 7.1 Hz, 3H), 0.99 (t, *J* = 7.1 Hz, 3H), 0.90 (t, *J* = 7.3 Hz, 3H).

**<sup>13</sup>C NMR** (101 MHz, CDCl<sub>3</sub>) δ 136.1, 127.7 (d, *J*<sub>C-P</sub> = 6.2 Hz), 123.5 (d, *J*<sub>C-P</sub> = 7.1 Hz), 121.7, 119.1, 118.9, 111.3, 109.5, 62.4 (d, *J*<sub>C-P</sub> = 7.1 Hz), 61.6 (d, *J*<sub>C-P</sub> = 7.5 Hz), 36.6 (d, *J*<sub>C-P</sub> = 141.4 Hz), 23.5, 16.4 (d, *J*<sub>C-P</sub> = 6.0 Hz), 16.2 (d, *J*<sub>C-P</sub> = 5.7 Hz), 12.6 (d, *J*<sub>C-P</sub> = 15.2 Hz).

**<sup>31</sup>P NMR** (162 MHz, CDCl<sub>3</sub>) δ 30.3.

**HRMS** (ESI-TOF) *m/z*: calcd for C<sub>15</sub>H<sub>22</sub>NO<sub>3</sub>P [M+H]<sup>+</sup>: 296.1410, found: 296.1415.

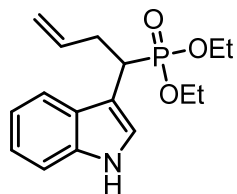

**Diethyl (1-(1H-indol-3-yl)but-3-en-1-yl)phosphonate (3ta)** was prepared according to the standard conditions as brown solid in 99% yield (64.5 mg) from substrate **1t** (37.4 mg, 0.2 mmol) for 36 h.

Melting Point: 78–80 °C.

**<sup>1</sup>H NMR** (400 MHz, CDCl<sub>3</sub>) δ 9.15 (s, 1H), 7.63 (d, *J* = 7.8 Hz, 1H), 7.35 (d, *J* = 8.0 Hz, 1H), 7.19 – 7.07 (m, 3H), 5.71 (m, 1H), 5.00 (dd, *J* = 17.0, 1.3 Hz, 1H), 4.87 (d, *J* = 10.1 Hz, 1H),

4.20 – 4.03 (m, 2H), 3.88 – 3.78 (m, 1H), 3.65 – 3.55 (m, 1H), 3.51 – 3.42 (m, 1H), 2.95 – 2.83 (m, 1H), 2.77 (dt,  $J = 10.5, 8.4$  Hz, 1H), 1.32 (t,  $J = 7.1$  Hz, 3H), 0.99 (t,  $J = 7.0$  Hz, 3H).

$^{13}\text{C}$  NMR (101 MHz,  $\text{CDCl}_3$ )  $\delta$  136.0 (d,  $J_{\text{C-P}} = 6.8$  Hz), 135.8, 127.4 (d,  $J_{\text{C-P}} = 5.8$  Hz), 123.8 (d,  $J_{\text{C-P}} = 6.9$  Hz), 121.8, 119.2, 118.9, 116.4, 111.4, 109.2, 62.6 (d,  $J_{\text{C-P}} = 7.1$  Hz), 61.8 (d,  $J_{\text{C-P}} = 7.4$  Hz), 35.6, 34.3 (d,  $J_{\text{C-P}} = 22.2$  Hz), 16.4 (d,  $J_{\text{C-P}} = 5.9$  Hz), 16.2 (d,  $J_{\text{C-P}} = 5.6$  Hz).

$^{31}\text{P}$  NMR (162 MHz,  $\text{CDCl}_3$ )  $\delta$  29.4.

HRMS (ESI-TOF)  $m/z$ : calcd for  $\text{C}_{16}\text{H}_{22}\text{NO}_3\text{P}$   $[\text{M}+\text{H}]^+$ : 308.1410, found: 308.1416.

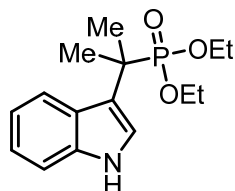

**Diethyl (2-(1H-indol-3-yl)propan-2-yl)phosphonate (3ua)** was prepared according to the standard conditions as white solid in 77% yield (45.7 mg) from substrate **1u** (35.0 mg, 0.2 mmol) for 22 h.

Melting Point: 135–137 °C.

$^1\text{H}$  NMR (400 MHz,  $\text{CDCl}_3$ )  $\delta$  9.44 (s, 1H), 7.99 (d,  $J = 7.9$  Hz, 1H), 7.31 (d,  $J = 7.9$  Hz, 1H), 7.10 (dt,  $J = 14.6, 7.0$  Hz, 2H), 6.80 (s, 1H), 4.03 – 3.83 (m, 4H), 1.73 (d,  $J = 16.5$  Hz, 6H), 1.23 (t,  $J = 7.0$  Hz, 6H).

$^{13}\text{C}$  NMR (101 MHz,  $\text{CDCl}_3$ )  $\delta$  136.9, 126.1, 123.6 (d,  $J_{\text{C-P}} = 8.2$  Hz), 122.2, 121.2, 118.7, 115.8, 111.5, 62.2 (d,  $J_{\text{C-P}} = 7.7$  Hz), 36.2 (d,  $J_{\text{C-P}} = 142.4$  Hz), 24.2 (d,  $J_{\text{C-P}} = 3.2$  Hz), 16.4 (d,  $J_{\text{C-P}} = 5.6$  Hz).

$^{31}\text{P}$  NMR (162 MHz,  $\text{CDCl}_3$ )  $\delta$  33.4.

HRMS (ESI-TOF)  $m/z$ : calcd for  $\text{C}_{15}\text{H}_{22}\text{NO}_3\text{P}$   $[\text{M}+\text{H}]^+$ : 296.1410, found: 296.1415.

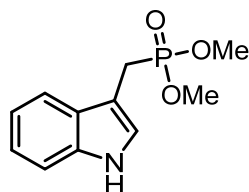

**Dimethyl ((1H-indol-3-yl)methyl)phosphonate (3ab)** was prepared according to the standard conditions as yellow solid in 86% yield (41.0 mg) from substrate **1a** (29.4 mg, 0.2 mmol) for 11 h.

Melting Point: 100–102 °C.

$^1\text{H}$  NMR (400 MHz,  $\text{CDCl}_3$ )  $\delta$  9.32 (s, 1H), 7.61 (d,  $J = 7.5$  Hz, 1H), 7.32 (d,  $J = 7.5$  Hz, 1H), 7.22 – 7.08 (m, 2H), 7.05 – 6.98 (m, 1H), 3.66 (d,  $J = 10.7$  Hz, 6H), 3.33 (d,  $J = 20.1$  Hz, 2H).

The  $^1\text{H}$  NMR spectrum is identical to ref. 17.

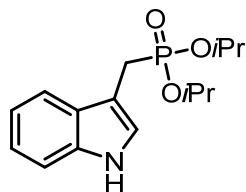

**Diisopropyl ((1H-indol-3-yl)methyl)phosphonate (3ac)** was prepared according to the standard conditions as yellow solid in 49% yield (28.9 mg) from substrate **1a** (29.4 mg, 0.2 mmol) for 11 h.

Melting Point: 107–109 °C.

<sup>1</sup>H NMR (400 MHz, CDCl<sub>3</sub>) δ 8.81 (s, 1H), 7.63 (d, *J* = 7.8 Hz, 1H), 7.35 (d, *J* = 8.0 Hz, 1H), 7.22 – 7.07 (m, 3H), 4.80 – 4.48 (m, 2H), 3.26 (d, *J* = 20.2 Hz, 2H), 1.29 (d, *J* = 6.2 Hz, 6H), 1.11 (d, *J* = 6.2 Hz, 6H).

The <sup>1</sup>H NMR spectrum is identical to ref. 17.

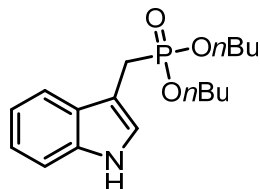

**Dibutyl ((1H-indol-3-yl)methyl)phosphonate (3ad)** was prepared according to the standard conditions as brown solid in 50% yield (32.0 mg) from substrate **1a** (29.4 mg, 0.2 mmol) for 18 h.

Melting Point: 70–72 °C.

<sup>1</sup>H NMR (400 MHz, CDCl<sub>3</sub>) δ 9.11 (s, 1H), 7.61 (d, *J* = 7.7 Hz, 1H), 7.34 (d, *J* = 7.9 Hz, 1H), 7.20 – 7.06 (m, 2H), 7.03 (s, 1H), 4.04 – 3.86 (m, 4H), 3.31 (d, *J* = 20.1 Hz, 2H), 1.60 – 1.49 (m, 4H), 1.31 (td, *J* = 14.9, 7.4 Hz, 4H), 0.86 (t, *J* = 7.4 Hz, 6H).

The <sup>1</sup>H NMR spectrum is identical to ref. 17.

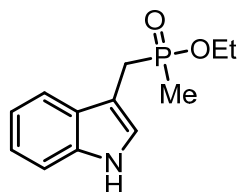

**Ethyl ((1H-indol-3-yl)methyl)(methyl)phosphinate (3ae)** was prepared according to the standard conditions as yellow liquid in 86% yield (40.8 mg) from substrate **1a** (29.4 mg, 0.2 mmol) for 13 h.

<sup>1</sup>H NMR (400 MHz, CDCl<sub>3</sub>) δ 8.95 (s, 1H), 7.57 (d, *J* = 7.8 Hz, 1H), 7.36 (d, *J* = 8.0 Hz, 1H), 7.15 (ddd, *J* = 14.0, 12.9, 7.1 Hz, 3H), 4.16 – 3.98 (m, 2H), 3.29 (dq, *J* = 15.6, 17.2 Hz, 2H), 1.38 (d, *J* = 13.6 Hz, 3H), 1.30 (t, *J* = 7.0 Hz, 3H).

<sup>13</sup>C NMR (101 MHz, CDCl<sub>3</sub>) δ 136.1, 127.2, 123.8 (d, *J*<sub>C-P</sub> = 6.7 Hz), 122.0, 119.5, 118.4, 111.4, 104.9, 60.4 (d, *J*<sub>C-P</sub> = 6.7 Hz), 26.9 (d, *J*<sub>C-P</sub> = 93.6 Hz), 16.7 (d, *J*<sub>C-P</sub> = 6.0 Hz), 13.3 (d, *J*<sub>C-P</sub> = 93.2 Hz).

<sup>31</sup>P NMR (162 MHz, CDCl<sub>3</sub>) δ 53.25.

**HRMS** (ESI–TOF) *m/z*: calcd for C<sub>12</sub>H<sub>16</sub>NO<sub>2</sub>P [M+H]<sup>+</sup>: 238.0991, found: 238.0996.

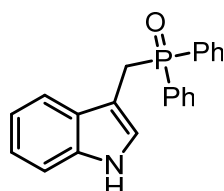

**((1H-indol-3-yl)methyl)diphenylphosphine oxide (3af)** was prepared according to the standard conditions as white solid in 75% yield (49.8 mg) from substrate **1a** (29.4 mg, 0.2 mmol) for 13 h.

Melting Point: 194–195 °C.



<sup>1</sup>H NMR (400 MHz, DMSO-*d*<sub>6</sub>) δ 10.86 (s, 1H), 7.95 – 7.79 (m, 4H), 7.67 (t, *J* = 14.3 Hz, 1H), 7.54 – 7.39 (m, 6H), 7.27 (d, *J* = 8.0 Hz, 1H), 7.03 (dd, *J* = 16.3, 9.0 Hz, 2H), 6.92 (t, *J* = 7.4 Hz, 1H), 3.96 (d, *J* = 12.8 Hz, 2H).

<sup>13</sup>C NMR (101 MHz, DMSO-*d*<sub>6</sub>) δ 135.6, 134.7, 133.7, 131.4, 130.8, 130.7, 128.5, 128.4, 128.0, 124.4 (d, *J*<sub>C-P</sub> = 6.4 Hz), 120.9, 119.2, 118.3, 111.2, 104.1, 104.0, 26.1 (d, *J*<sub>C-P</sub> = 70.7 Hz).

<sup>31</sup>P NMR (162 MHz, DMSO-*d*<sub>6</sub>) δ 27.50.

HRMS (ESI-TOF) *m/z*: calcd for C<sub>21</sub>H<sub>18</sub>NOP [M+H]<sup>+</sup>: 332.1199, found: 332.1207.

### 3.3 Generality and utilization studies

#### Gram-scale reaction:

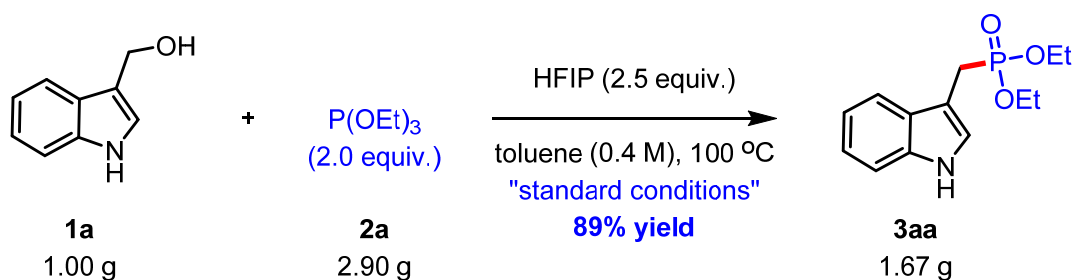

The reaction of **1a** (1.00 g) and **2a** (2.90 g) was conducted under standard conditions, and finally, **3aa** (1.67 g) was obtained in 89% yield.

#### Product derivatizations:

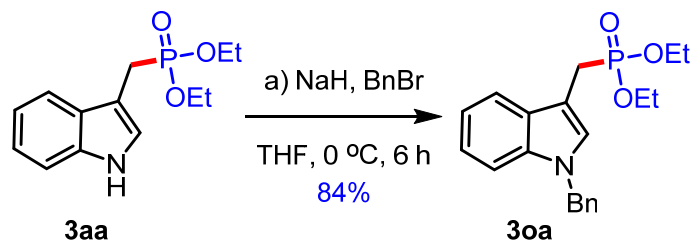

In a 10 ml round-bottomed flask, to a solution of **3aa** (53.4 mg) in dry THF (1 ml) was added NaH (12 mg, 1.5 equiv.) at 0 °C. After stirring at room temperature for 30 min. BnBr (51.3 mg, 1.5 equiv.) was added at 0 °C. After stirring at room temperature overnight, the mixture was quenched by saturated NH<sub>4</sub>Cl solution and extracted with EtOAc. The organic layer was dried over Na<sub>2</sub>SO<sub>4</sub>, removed under reduced pressure and purified by silica gel column chromatography (petroleum ester/ethyl acetate = 1:1) to give the desired product **3oa** (60.0 mg, 84%). The spectra were in accordance with the above-mentioned data.

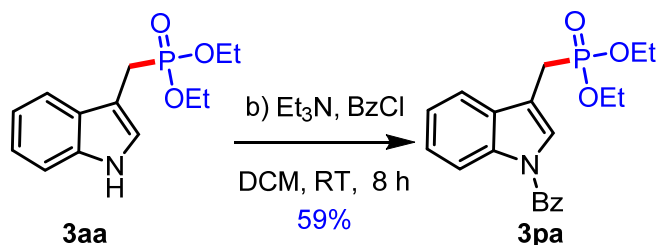

In a 10 ml round-bottomed flask, to a solution of **3aa** (53.4 mg) in DCM (2 ml) was added Et<sub>3</sub>N (40.4 mg, 2 equiv.) and BzCl (33.6 mg, 1.2 equiv.) under an argon atmosphere. After stirring at room temperature overnight, the mixture was quenched by saturated NH<sub>4</sub>Cl solution and extracted with

EtOAc. The organic layer was dried over Na<sub>2</sub>SO<sub>4</sub>, removed under reduced pressure and purified by silica gel column chromatography (petroleum ester/ethyl acetate = 1:1) to give the desired product **3pa** (43.8 mg, 59%). The spectra were in accordance with the above-mentioned data.

#### 4. Mechanism study

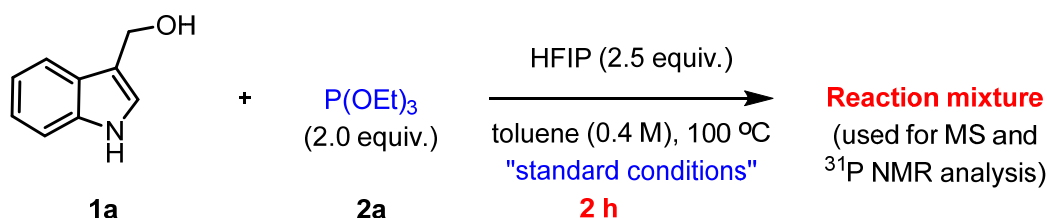

The standard reaction of **1a** and **2a** were reacted for 2 h and cooled to room temperature to stop the reaction. The starting materials were not fully consumed. The reaction mixture was used for Mass Spectroscopic analysis. The active intermediates (**4** and **6**) and by-product (**7**) in the proposed mechanism were detected in the Mass Spectrum.

The <sup>31</sup>P NMR spectrum of **2a** showed 138.8 ppm peak, and that of **3aa** showed 27.8 ppm peak. The reaction mixture was evaporated and used for <sup>31</sup>P NMR analysis. The <sup>31</sup>P NMR spectrum of this mixture only showed the **3aa** and intermediate **6** peaks. Therefore, intermediate **6** was observed to be 7.4 ppm. Notably, the <sup>31</sup>P NMR spectrum of the reaction mixture did not show the **2a** peak as compound **2a** was removed out from the mixture when evaporated on oil pump.

The key signal peaks in the Mass spectrum and <sup>31</sup>P NMR spectra are given below.

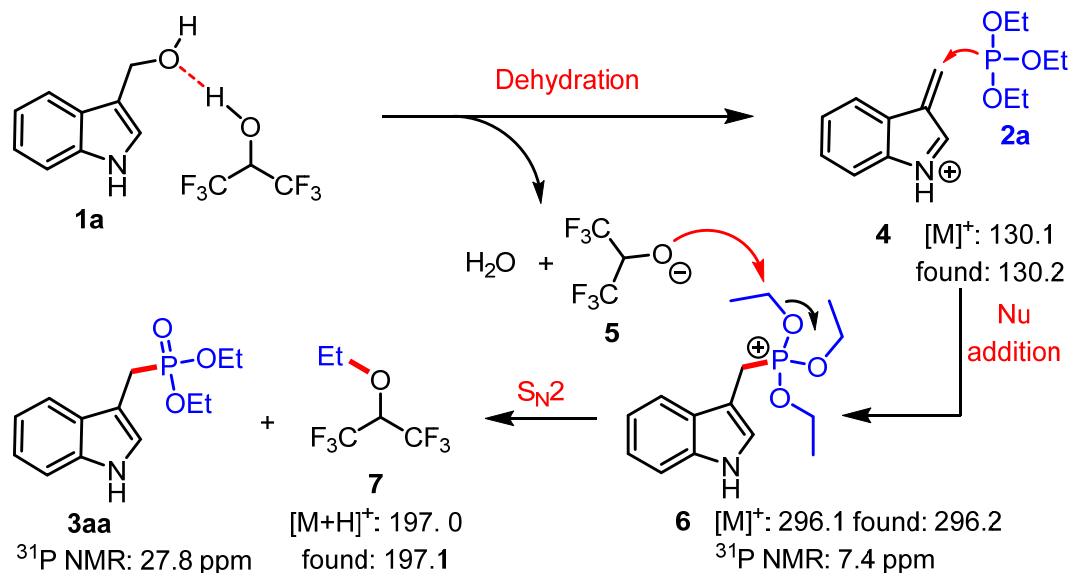

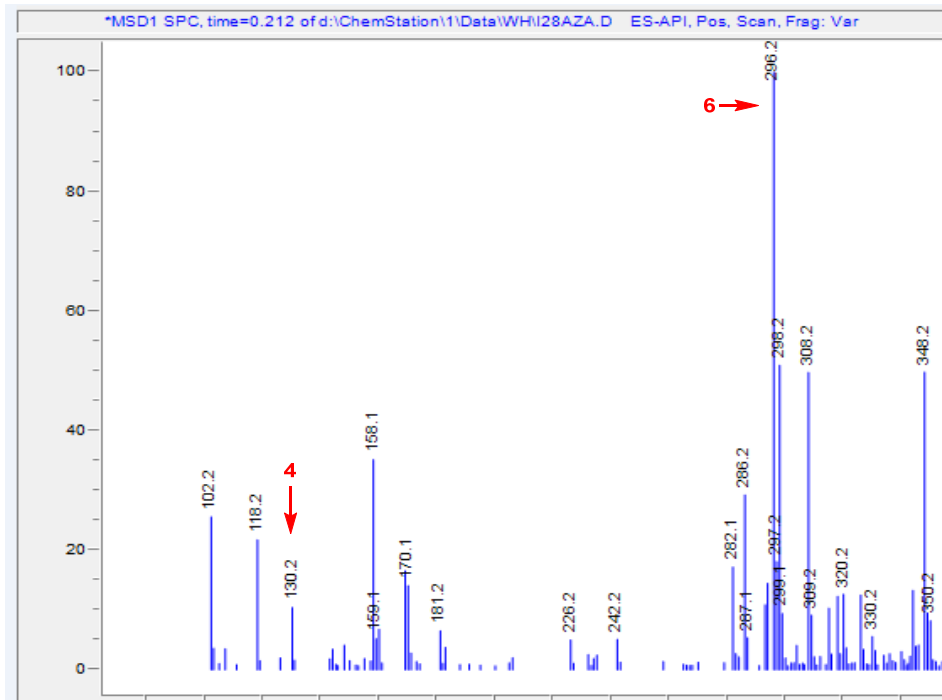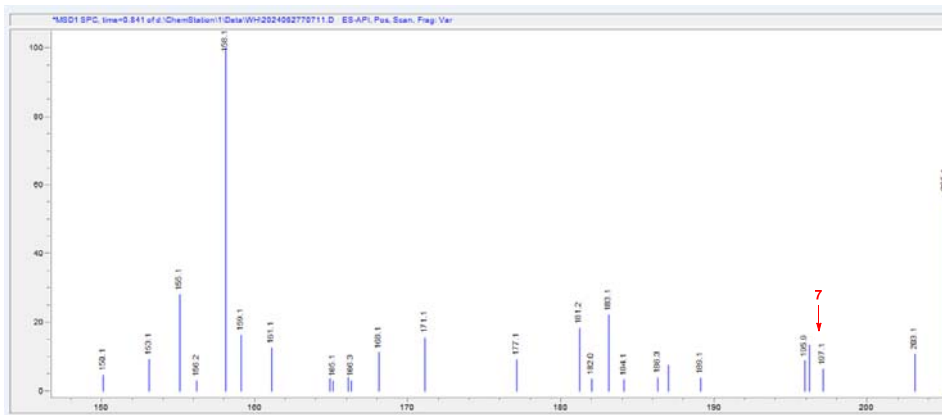

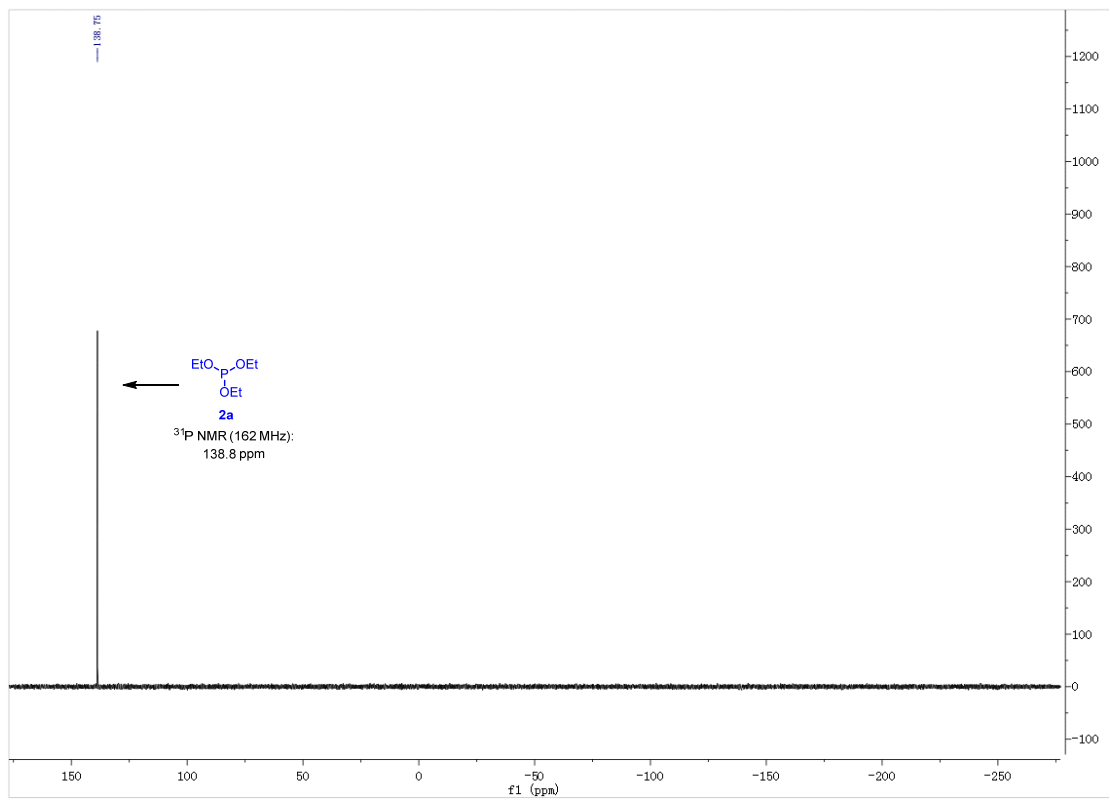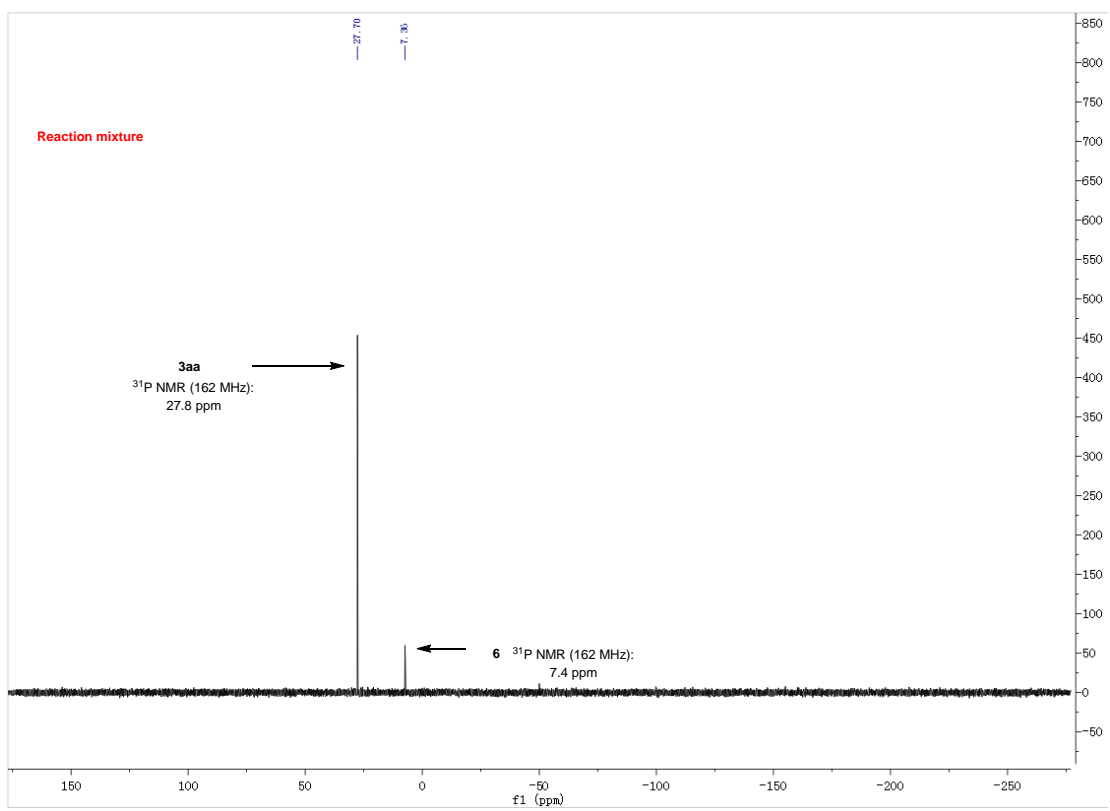

## 5. References

1. a) D. Lei, CN102389420 A **2012**; b) L. Jong, W.-R. Chao, US20040043965 A1 **2004**.
2. S. Prabhu, Z. Akbar, F. Harris, K. Karakoula, R. Lea, F. Rowther, T. Warr and T. Snape, *Bioorgan. Med. Chem.*, 2013, **21**, 1918–1924.
3. R. Kronbak, F. Duus and O. Vang, *J. Agric. Food Chem.*, 2012, **58**, 8453–8459.
4. P. Choudhary, A. Bahuguna, A. Kumar, S. S. Dhankhar, C. M. Nagaraja and V. Krishnan, *Green Chem.*, 2020, **22**, 5084.
5. R. Fan, H. Wen, Z. Chen, Y. Xia and W. Fang, *Org. Lett.*, 2024, **26**, 22-28.
6. A. Arcadi, G. Berden, A. Ciogli, D. Corinti, M. E. Crestoni, M. D. Angelis, G. Fabrizi, A. Goggiamani, A. Lazzetti, F. Marrone, V. Marsicano, J. Oomens and A. Serraiocco, *Eur. J. Org. Chem.*, 2022, e202201166.
7. W. Wang, R. Tachibana, Z. Zou, D. Chen, X. Zhang, K. Lau, F. Pojer, T. R. Ward and X. Hu, *Angew. Chem. Int. Ed.*, 2023, **62**, e202311896.
8. D. Goswami, A. Chattopadhyay, A. S haema and S. Chattopadhyay, *J. Org. Chem.*, 2012, **77**, 11064–11070.
9. M.-A. Zhang, N. Mulholland, A. Seville, G. Hough, N. Smith, H.-Q. Dong, W.-H. Zhang and Y.-C. Gu, *Tetrahedron*, 2021, **79**, 131835.
10. X. Chen, H. Fan, S. Zhang, C. Yu and W. Wang, *Chem. Eur. J.*, 2016, **22**, 716–723.
11. L. Ge, M. Zurro and S. R. Harutyunyan, *Chem. Eur. J.*, 2020, **26**, 16277–16280.
12. J. Kaur, A. Bhardwaj, Z. Huang and E. E. Knaus, *Bioorg. Med. Chem. Lett.*, 2012, **22**, 2154–2159.
13. B. T. Jones, J. García-Cárceles, L. Caiger, I. R. Hazelden, R. J. Lewis, T. Langer and J. F. Bower, *J. Am. Chem. Soc.*, 2021, **143**, 15593–15598.
14. X. Ma, Q. Xu, H. Li, C. Su, L. Yu, X. Zhang, H. Cao and L.-B. Han, *Green Chem.*, 2018, **20**, 3408–3413.
15. J. P. Haelters, B. Corbel and G. Sturtz, *Phosphorus Sulfur*, 1988, **37**, 41–63.
16. I. P. Beletskaya and I. D. Titanyuk, *J. Org. Chem.*, 2022, **87**, 2748–2757.
17. S. Guo, Z. Zhang, J. Xu, S. Li, Z. Fu and H. Cai, *ChemistrySelect*, 2019, **4**, 14111–14113.

## 6. NMR spectra copies

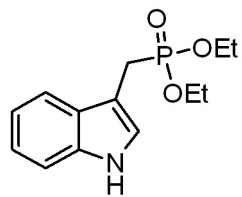

3aa

<sup>1</sup>H NMR  
400 MHz, CDCl<sub>3</sub>

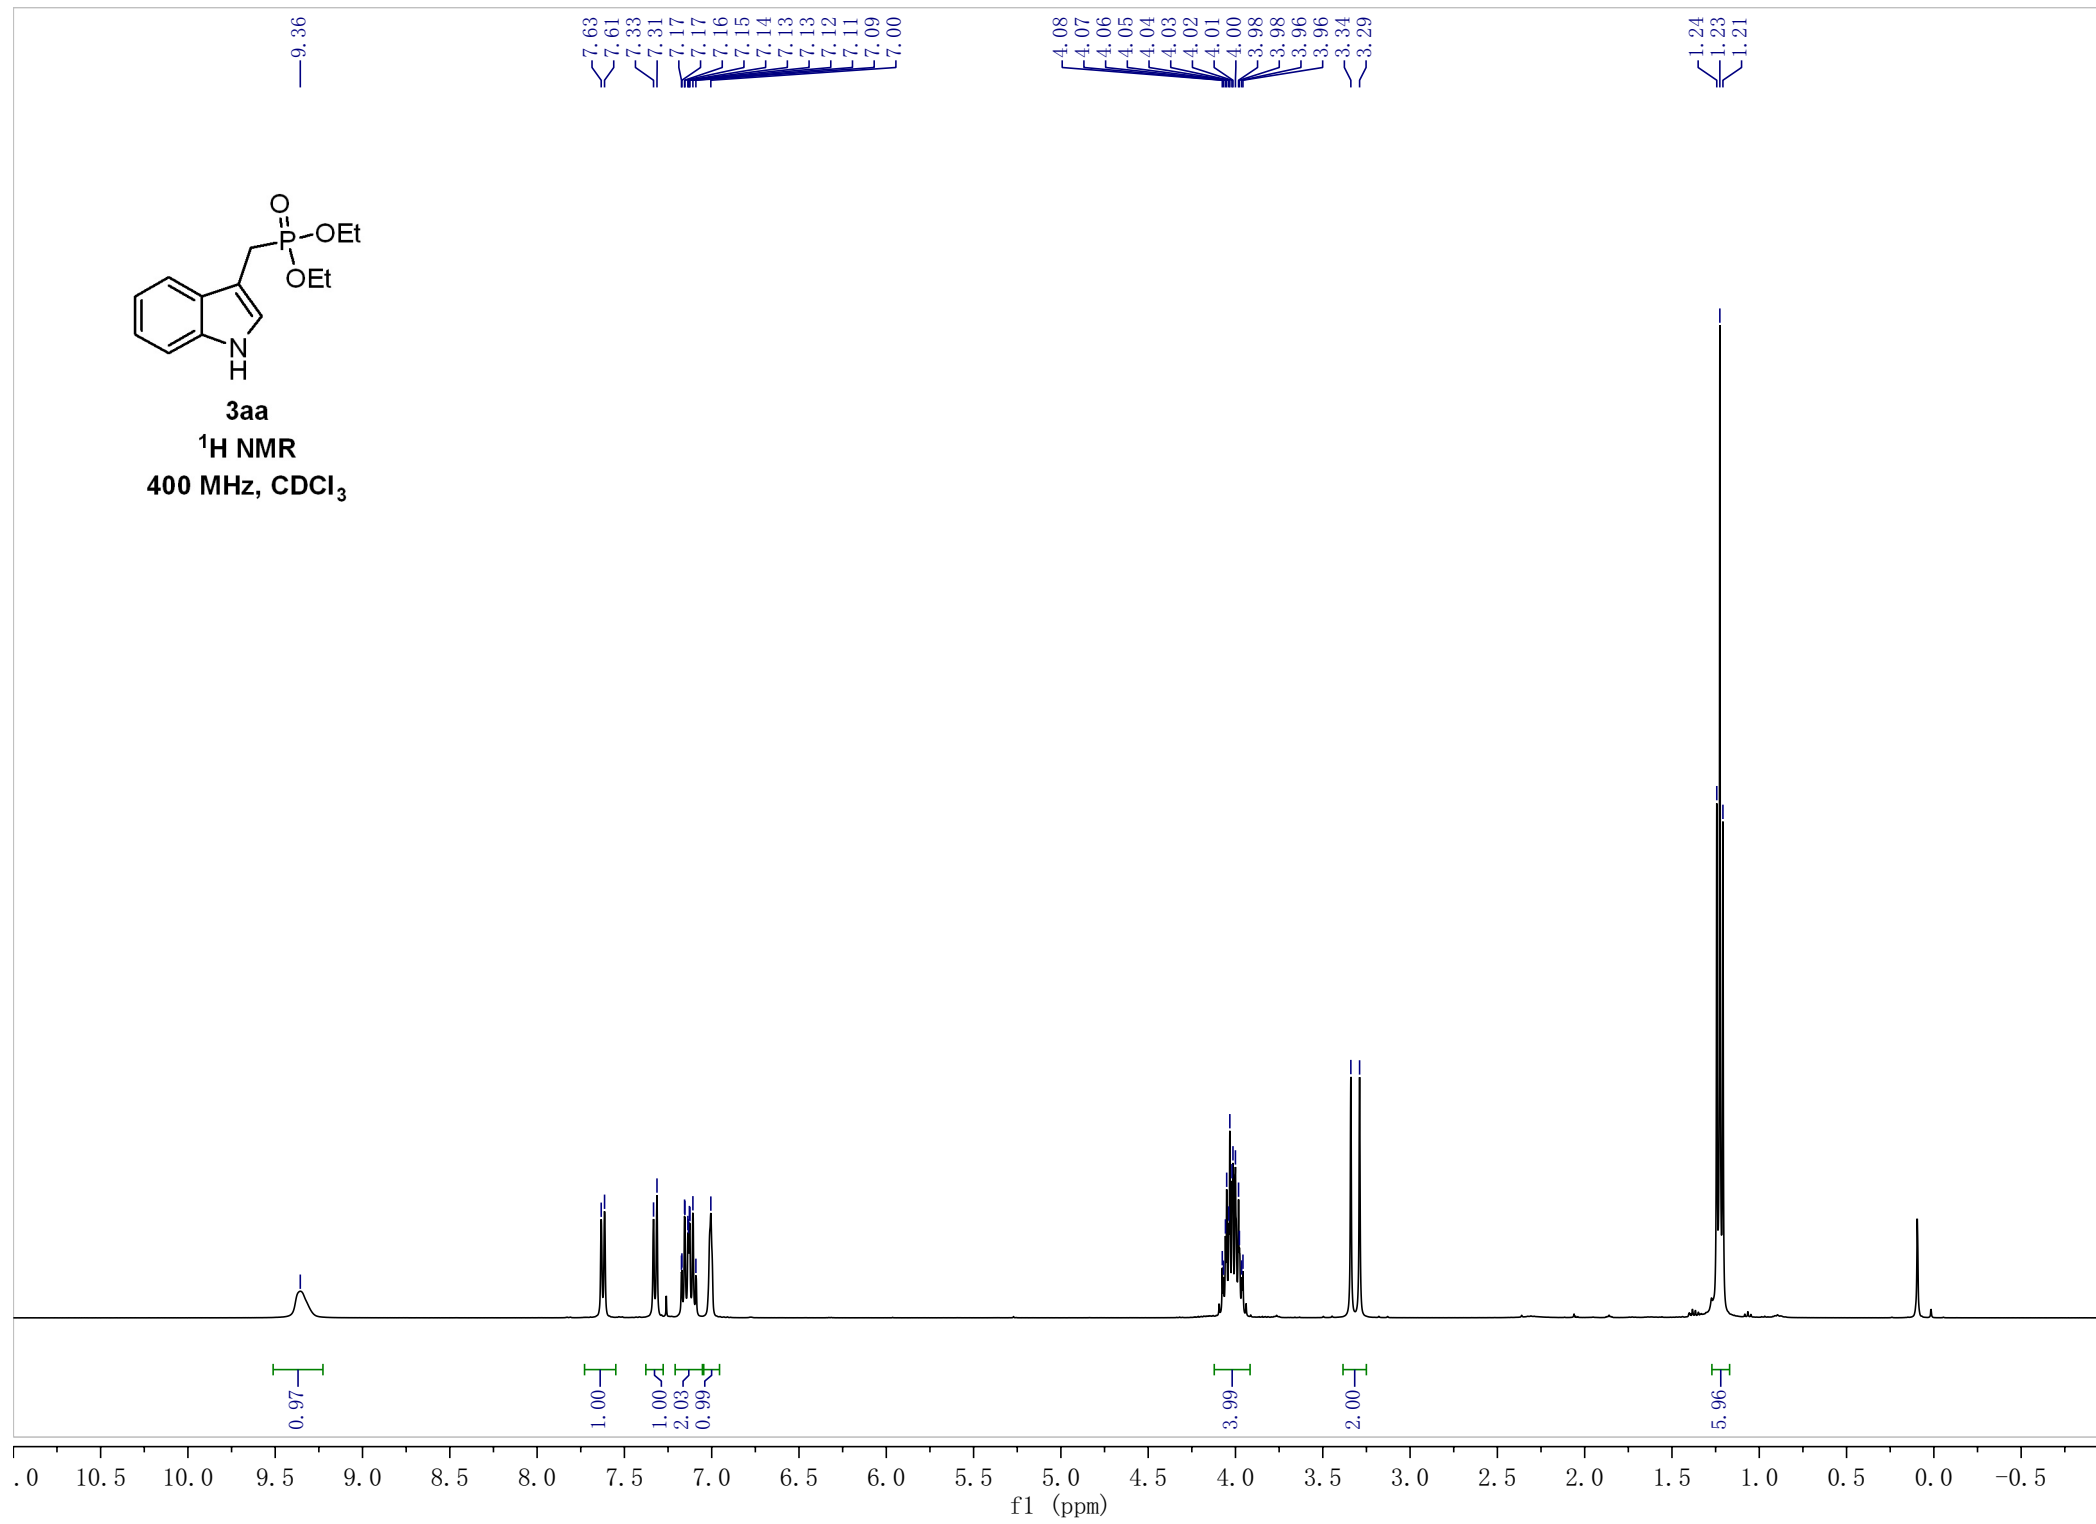



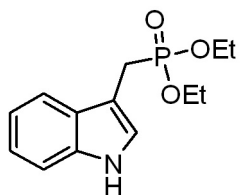

**3aa**

<sup>13</sup>C NMR  
101 MHz, CDCl<sub>3</sub>

136.07  
127.32  
127.27  
124.09  
124.01  
121.63  
119.10  
118.56  
111.37  
103.96  
77.32  
77.00  
76.68  
62.09  
62.02  
23.68  
22.25  
16.33  
16.27

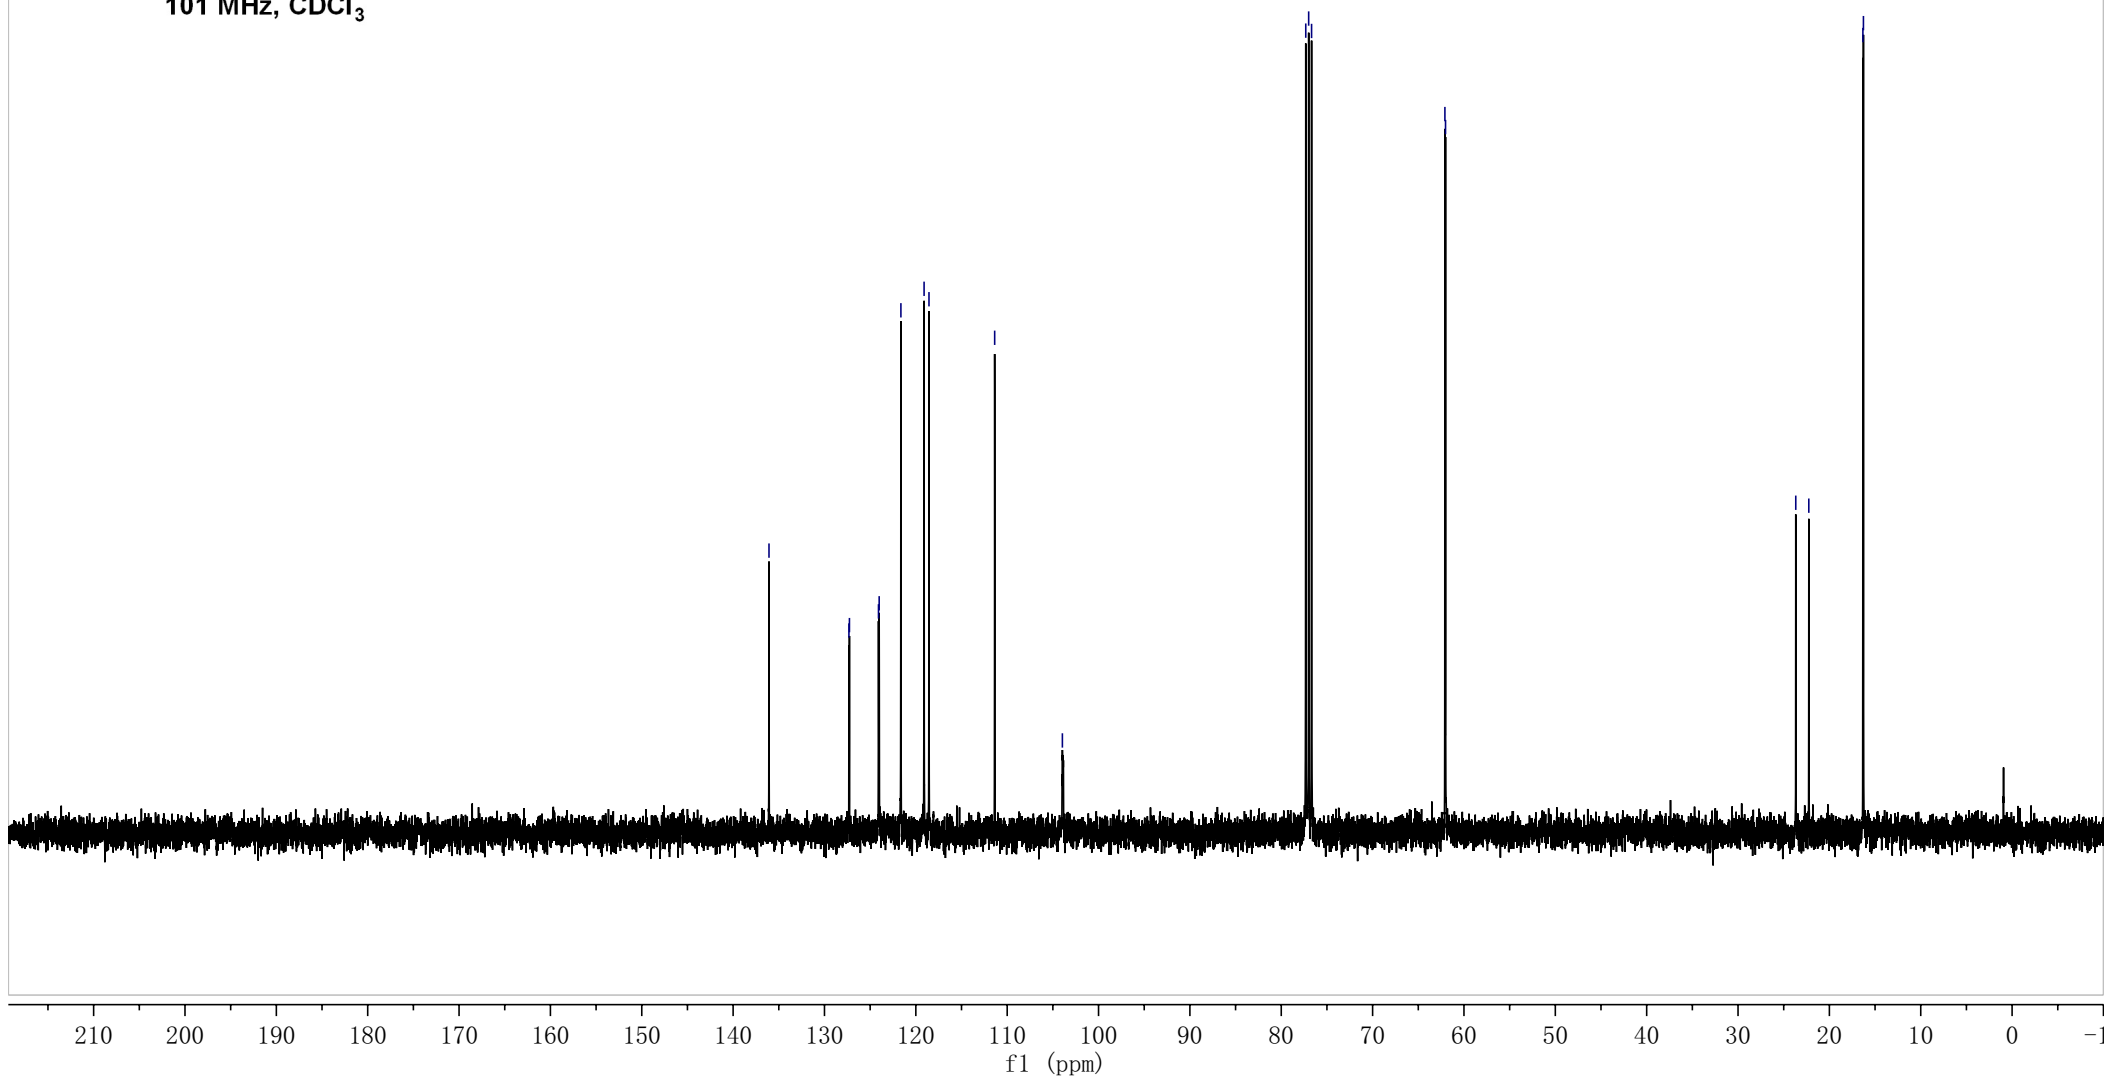



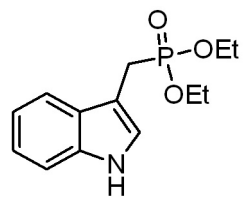

**3aa**

**$^{31}\text{P}$  NMR**  
**162 MHz,  $\text{CDCl}_3$**

—28.10

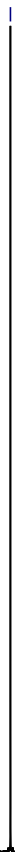

130 110 90 80 70 60 50 40 30 20 10 0 -10 -30 -50 -70 -90 -110 -130 -150 -170 -190 -210 -230

f1 (ppm)

S29

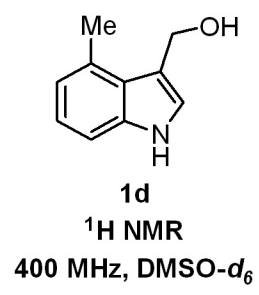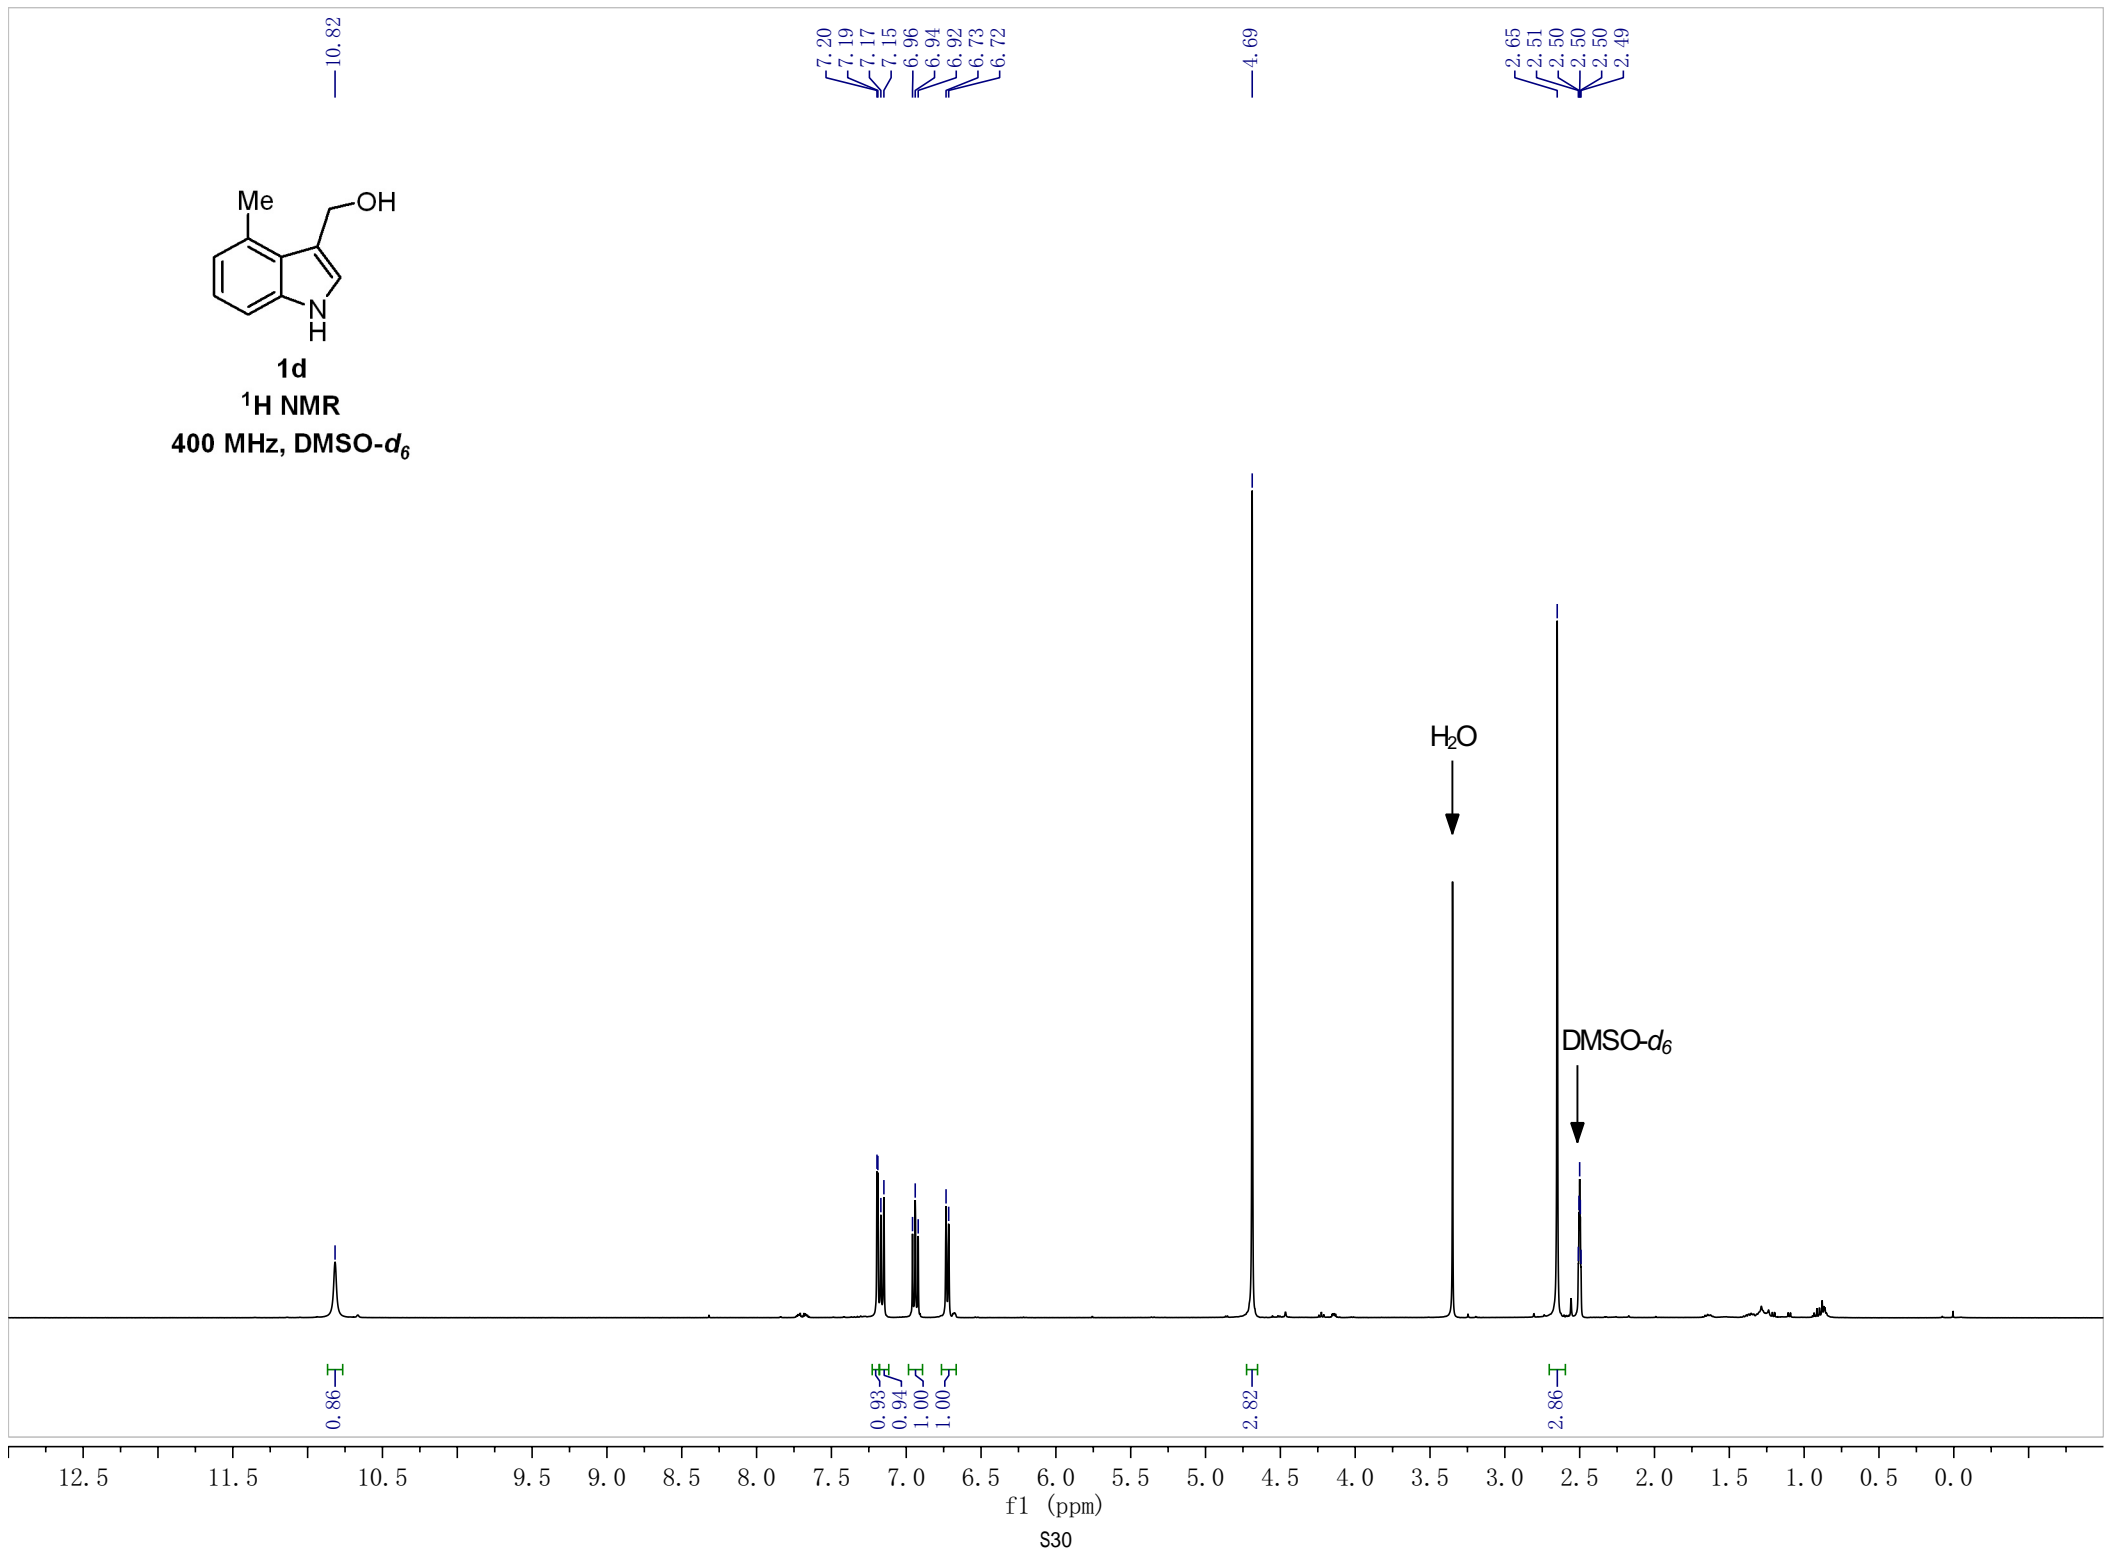

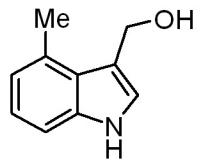

1d

<sup>13</sup>C NMR  
101 MHz, DMSO-d<sub>6</sub>

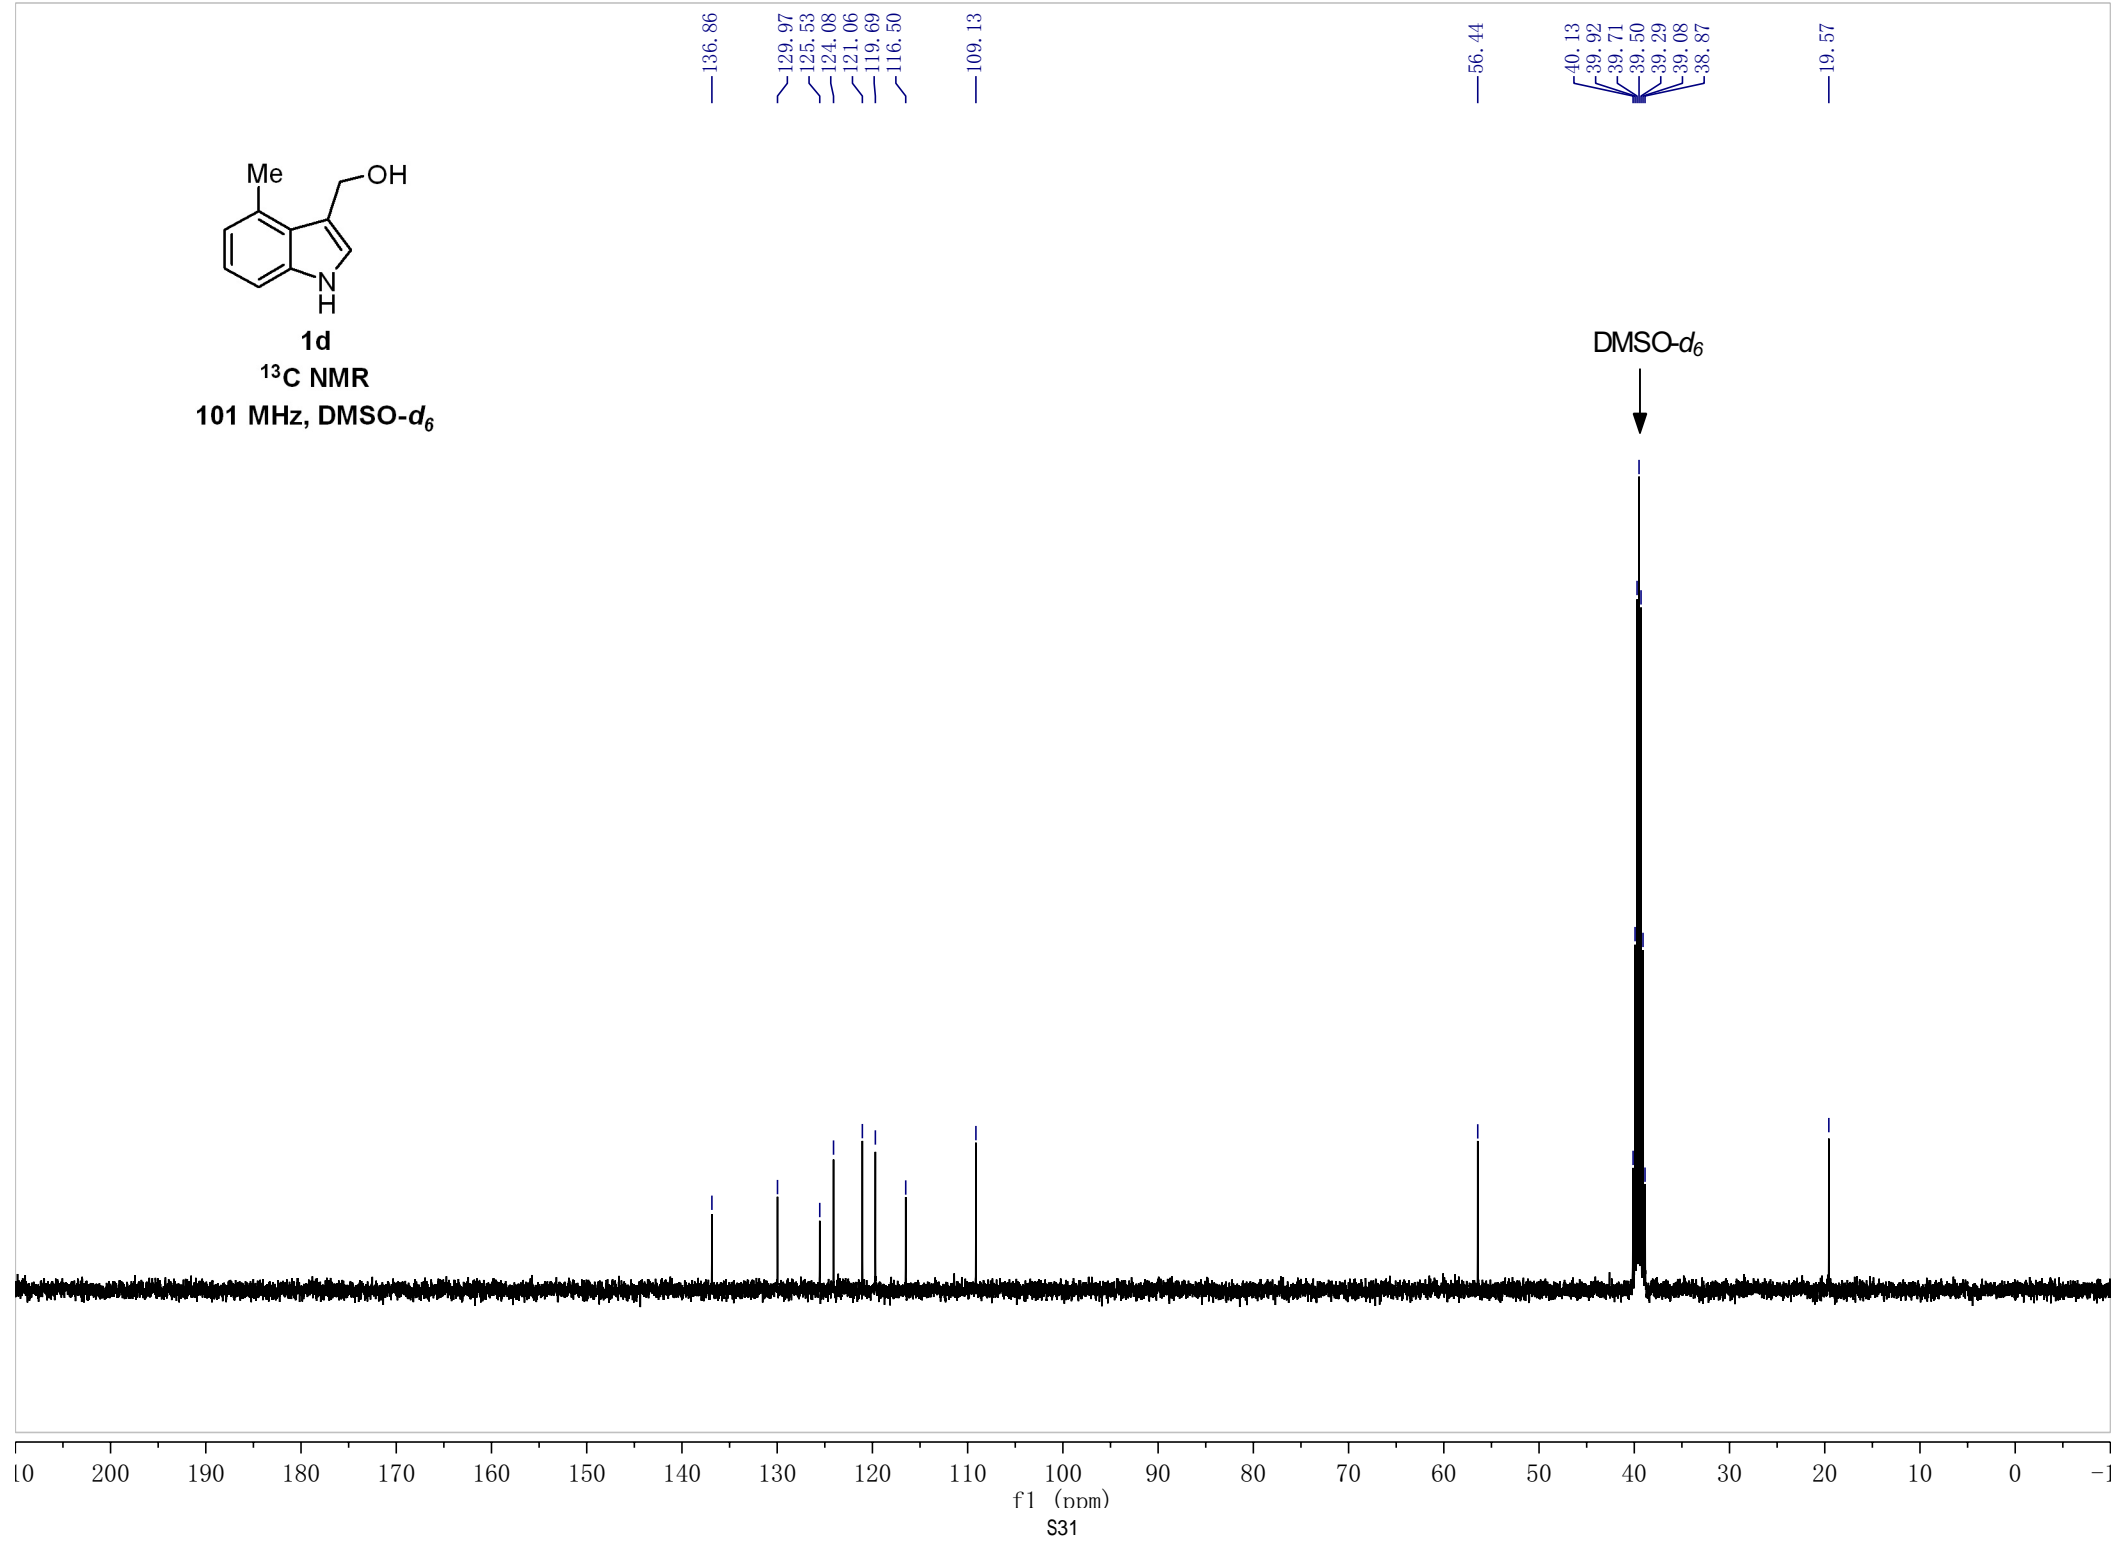

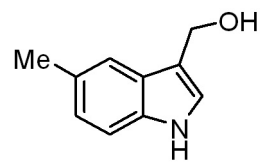

1e

<sup>1</sup>H NMR

400 MHz, DMSO-d<sub>6</sub>

10.71

7.39  
7.38  
7.24  
7.22  
7.18  
7.17  
6.92  
6.91  
6.90  
6.89

4.68  
4.62

2.51  
2.50  
2.50  
2.50  
2.49  
2.38

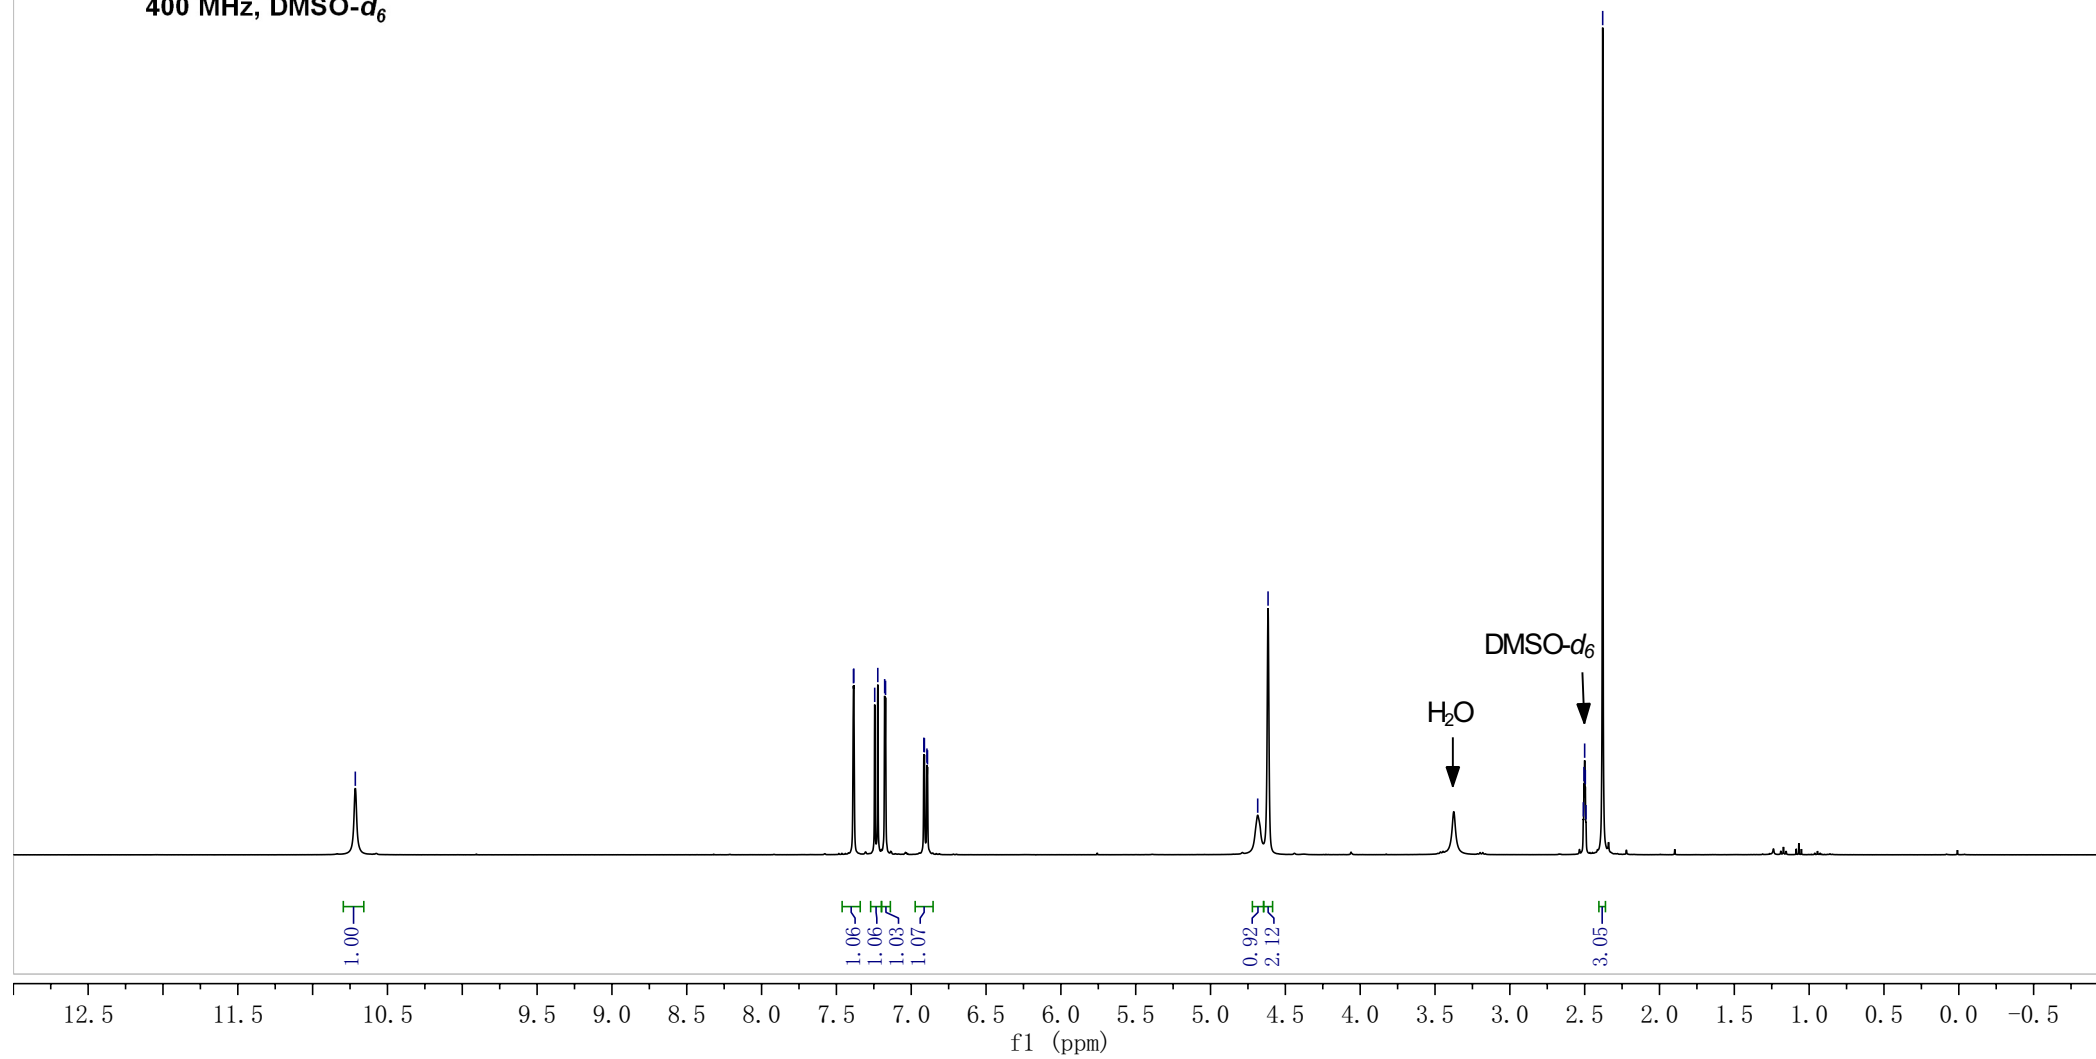

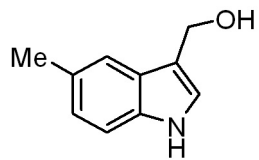

**1e**  
**<sup>13</sup>C NMR**  
**101 MHz, DMSO-*d*<sub>6</sub>**

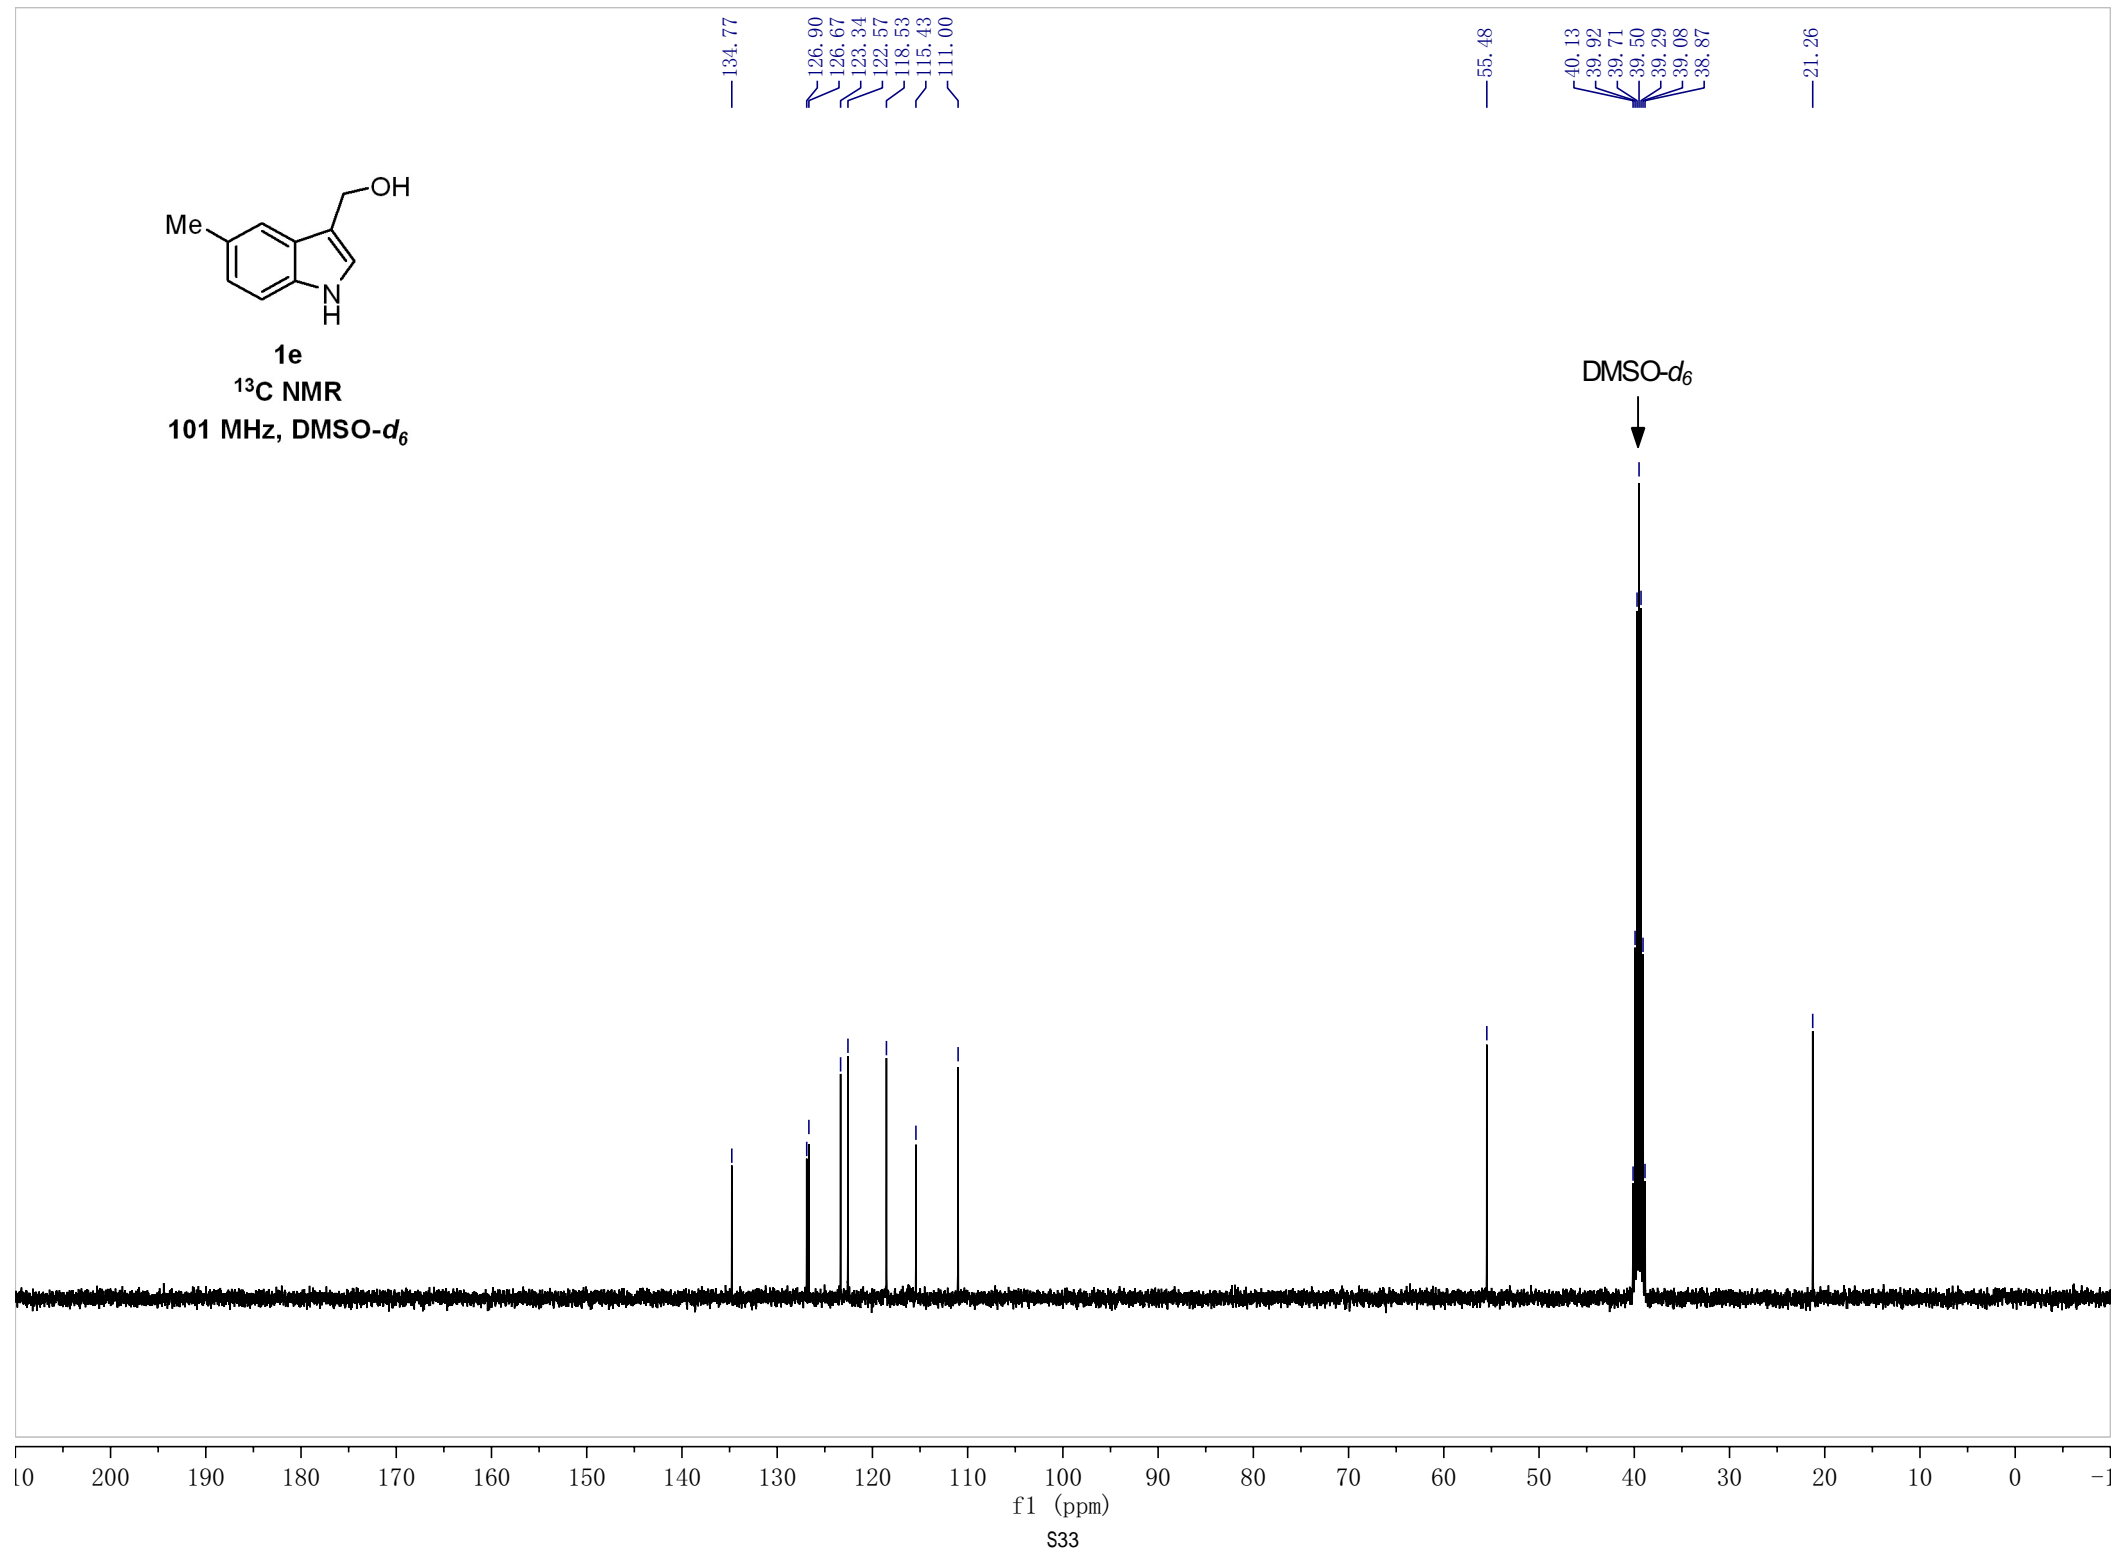

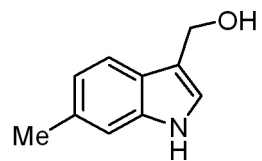

1f

<sup>1</sup>H NMR  
400 MHz, DMSO-d<sub>6</sub>

10.69

7.50  
7.48  
7.15  
6.84  
6.84  
6.82  
6.82

4.73  
4.72  
4.64  
4.62

2.50  
2.50  
2.50  
2.39

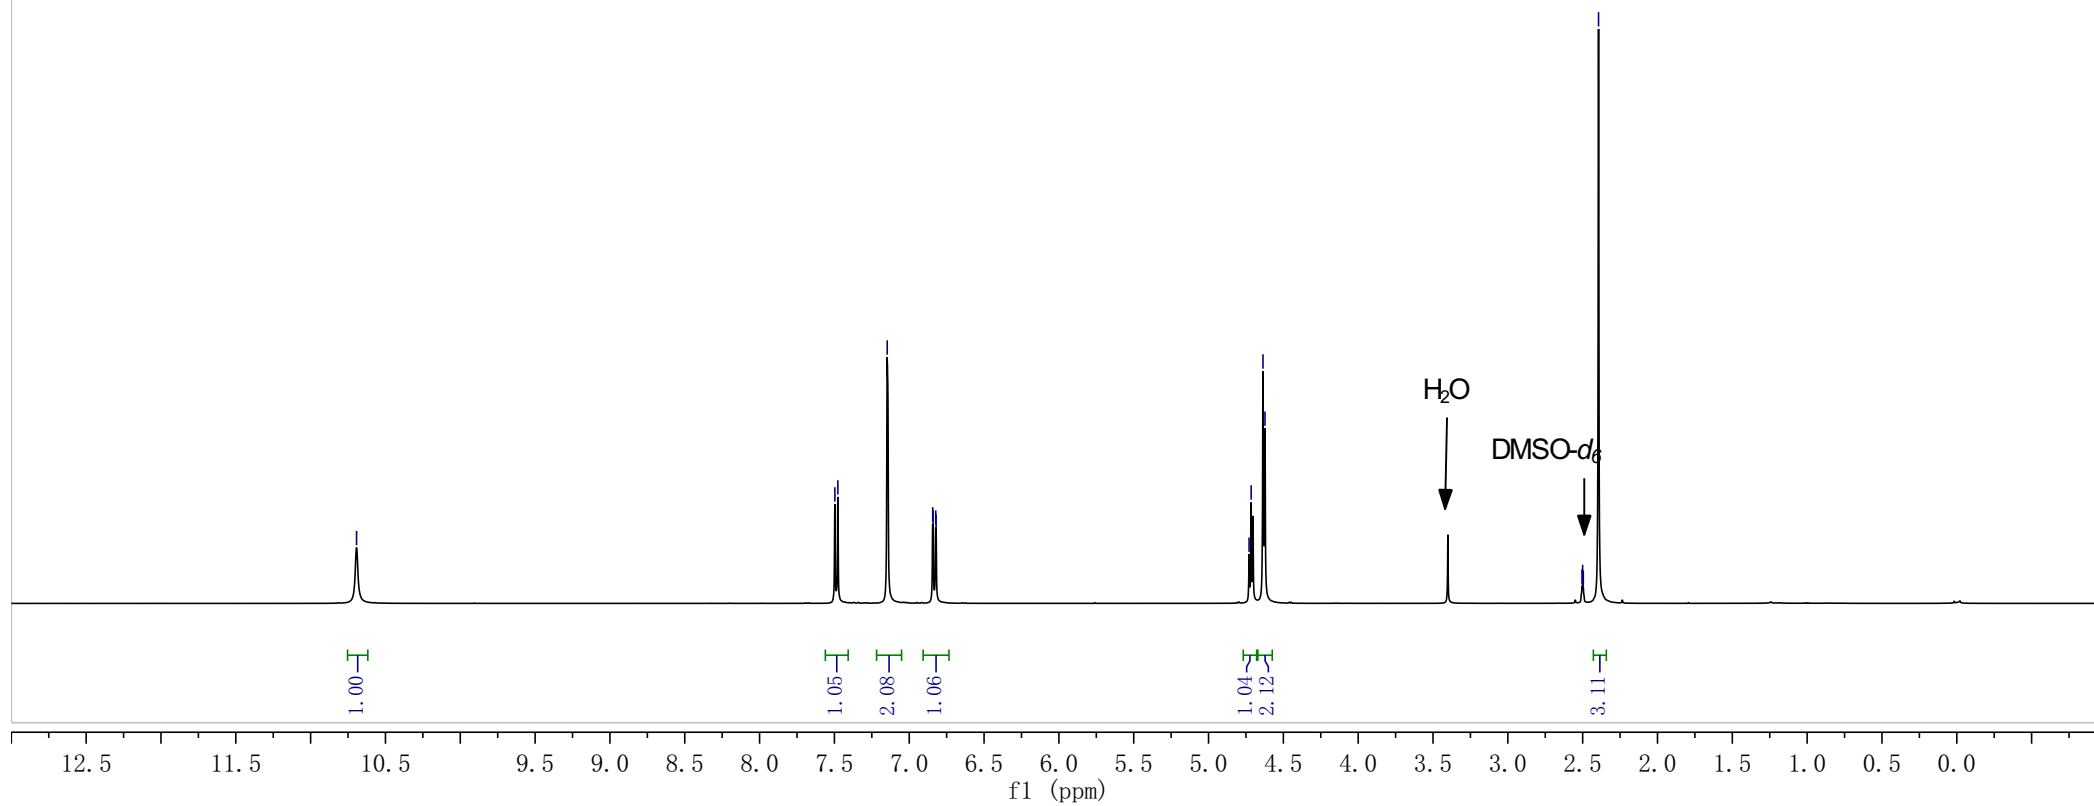

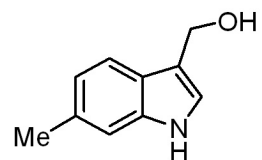

**1f**

<sup>13</sup>C NMR  
101 MHz, DMSO-*d*<sub>6</sub>

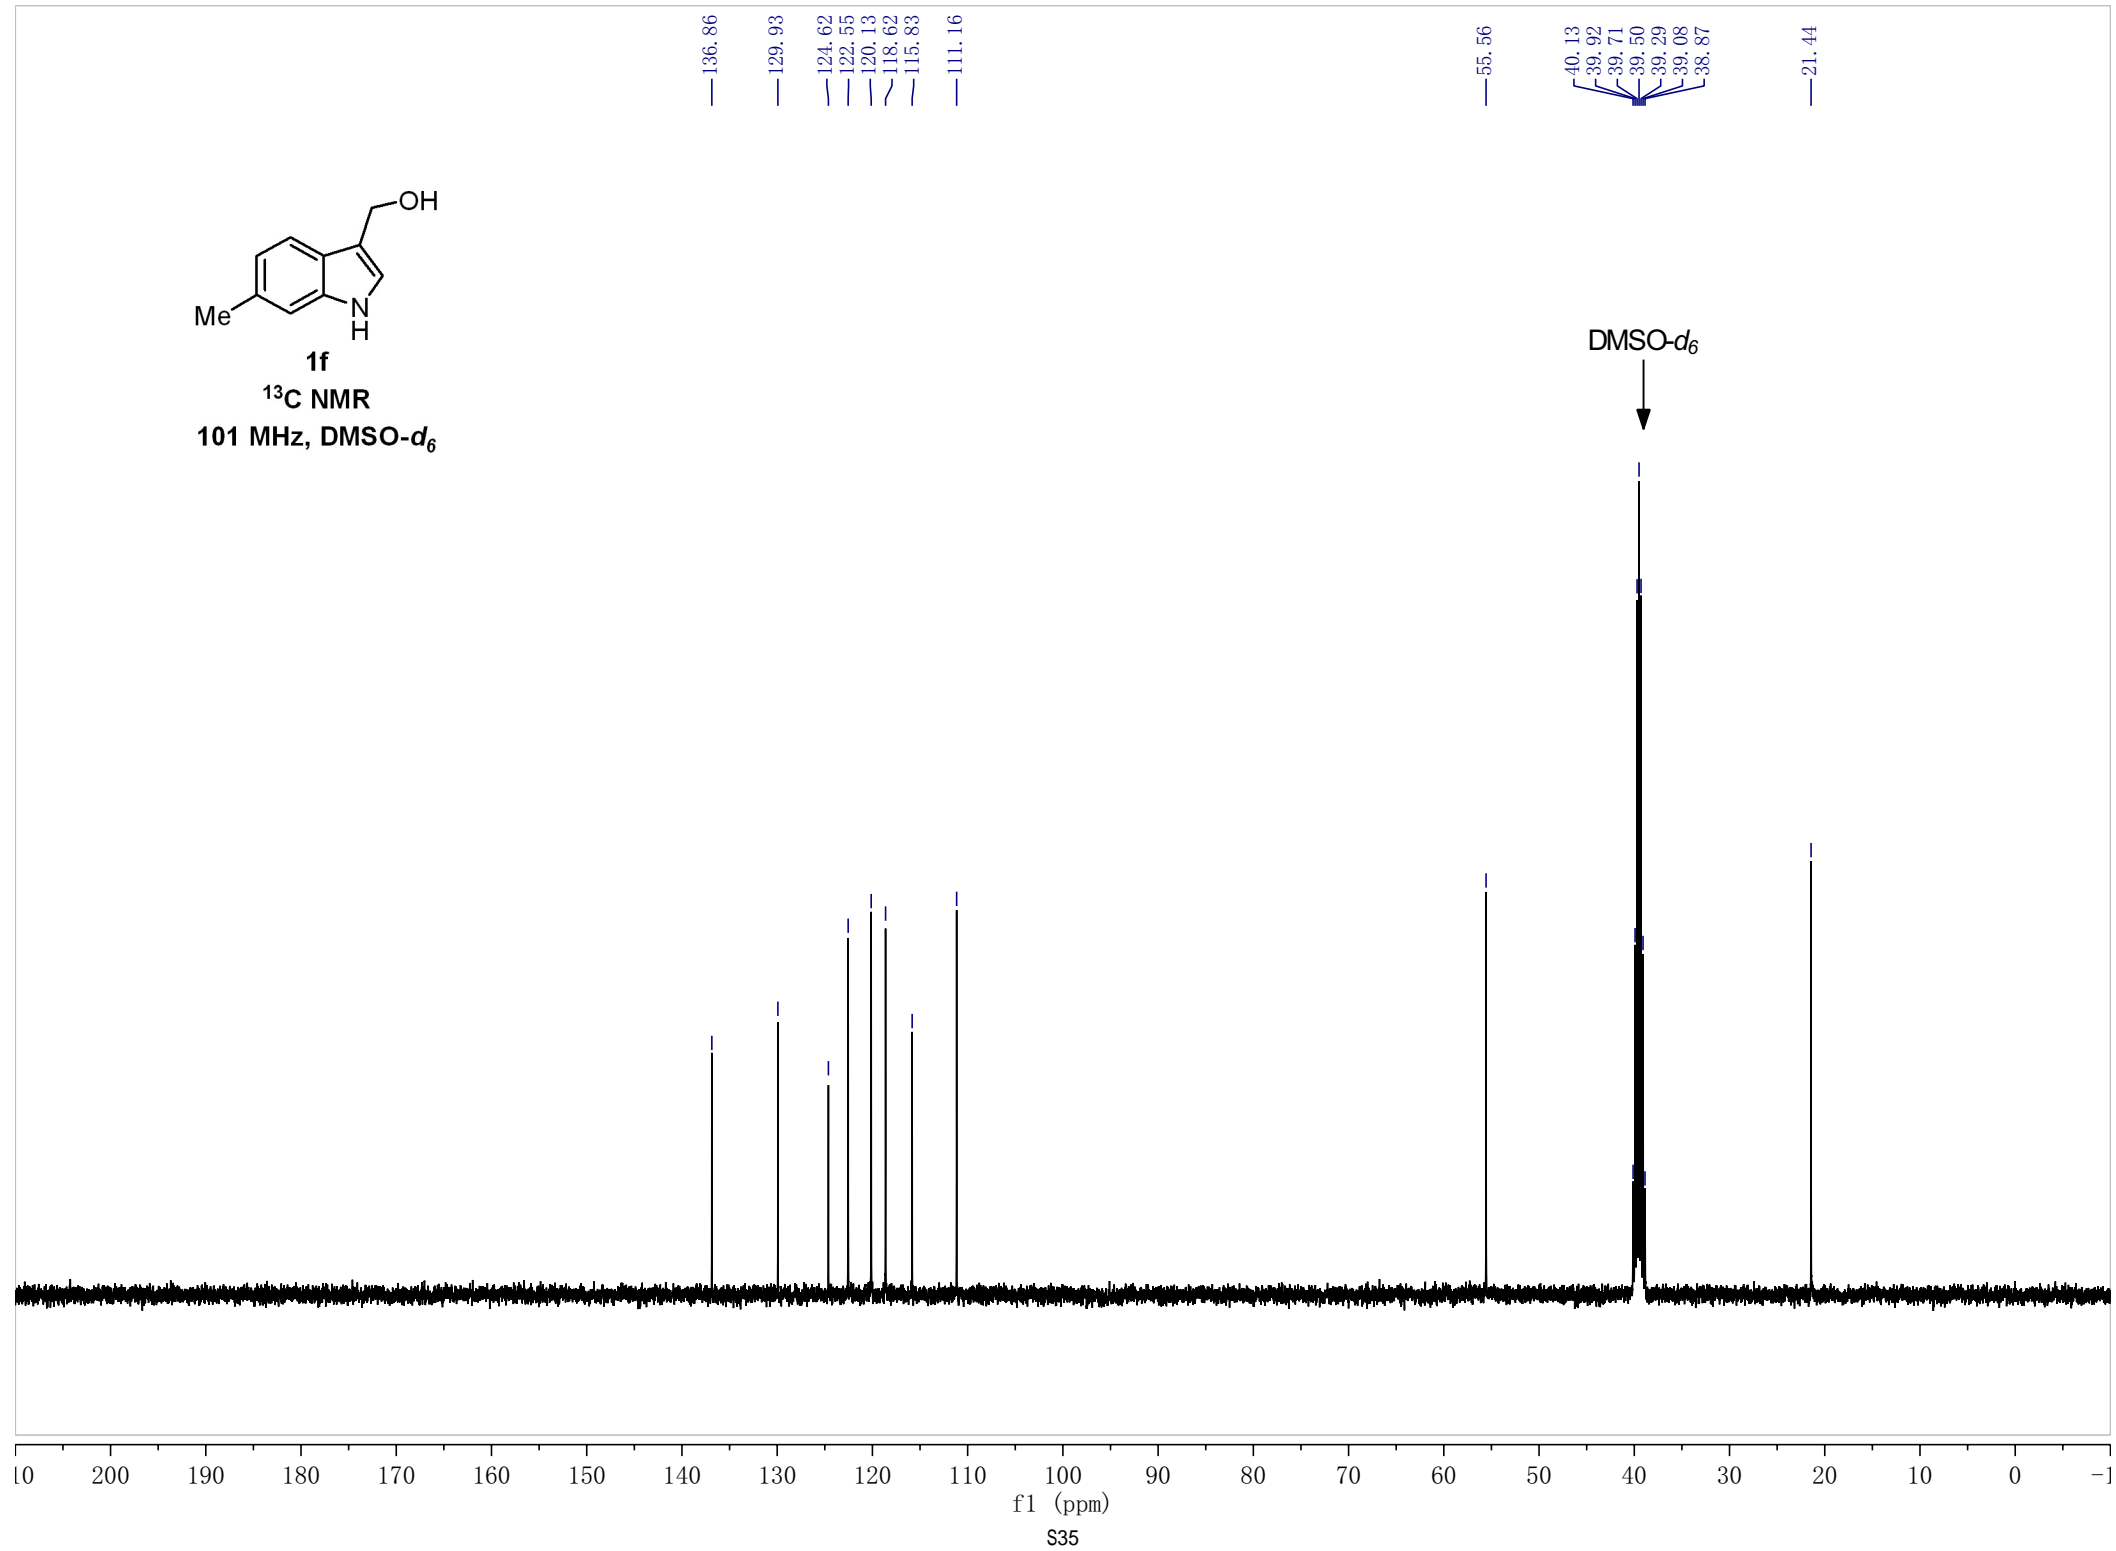

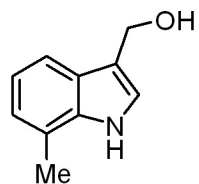

**1g**

<sup>1</sup>H NMR

400 MHz, DMSO-d<sub>6</sub>

10.84

7.46  
7.45  
7.25  
7.24  
6.94  
6.93  
6.91  
6.90  
6.88

4.76  
4.75  
4.74  
4.68  
4.67

2.50  
2.50  
2.50  
2.47

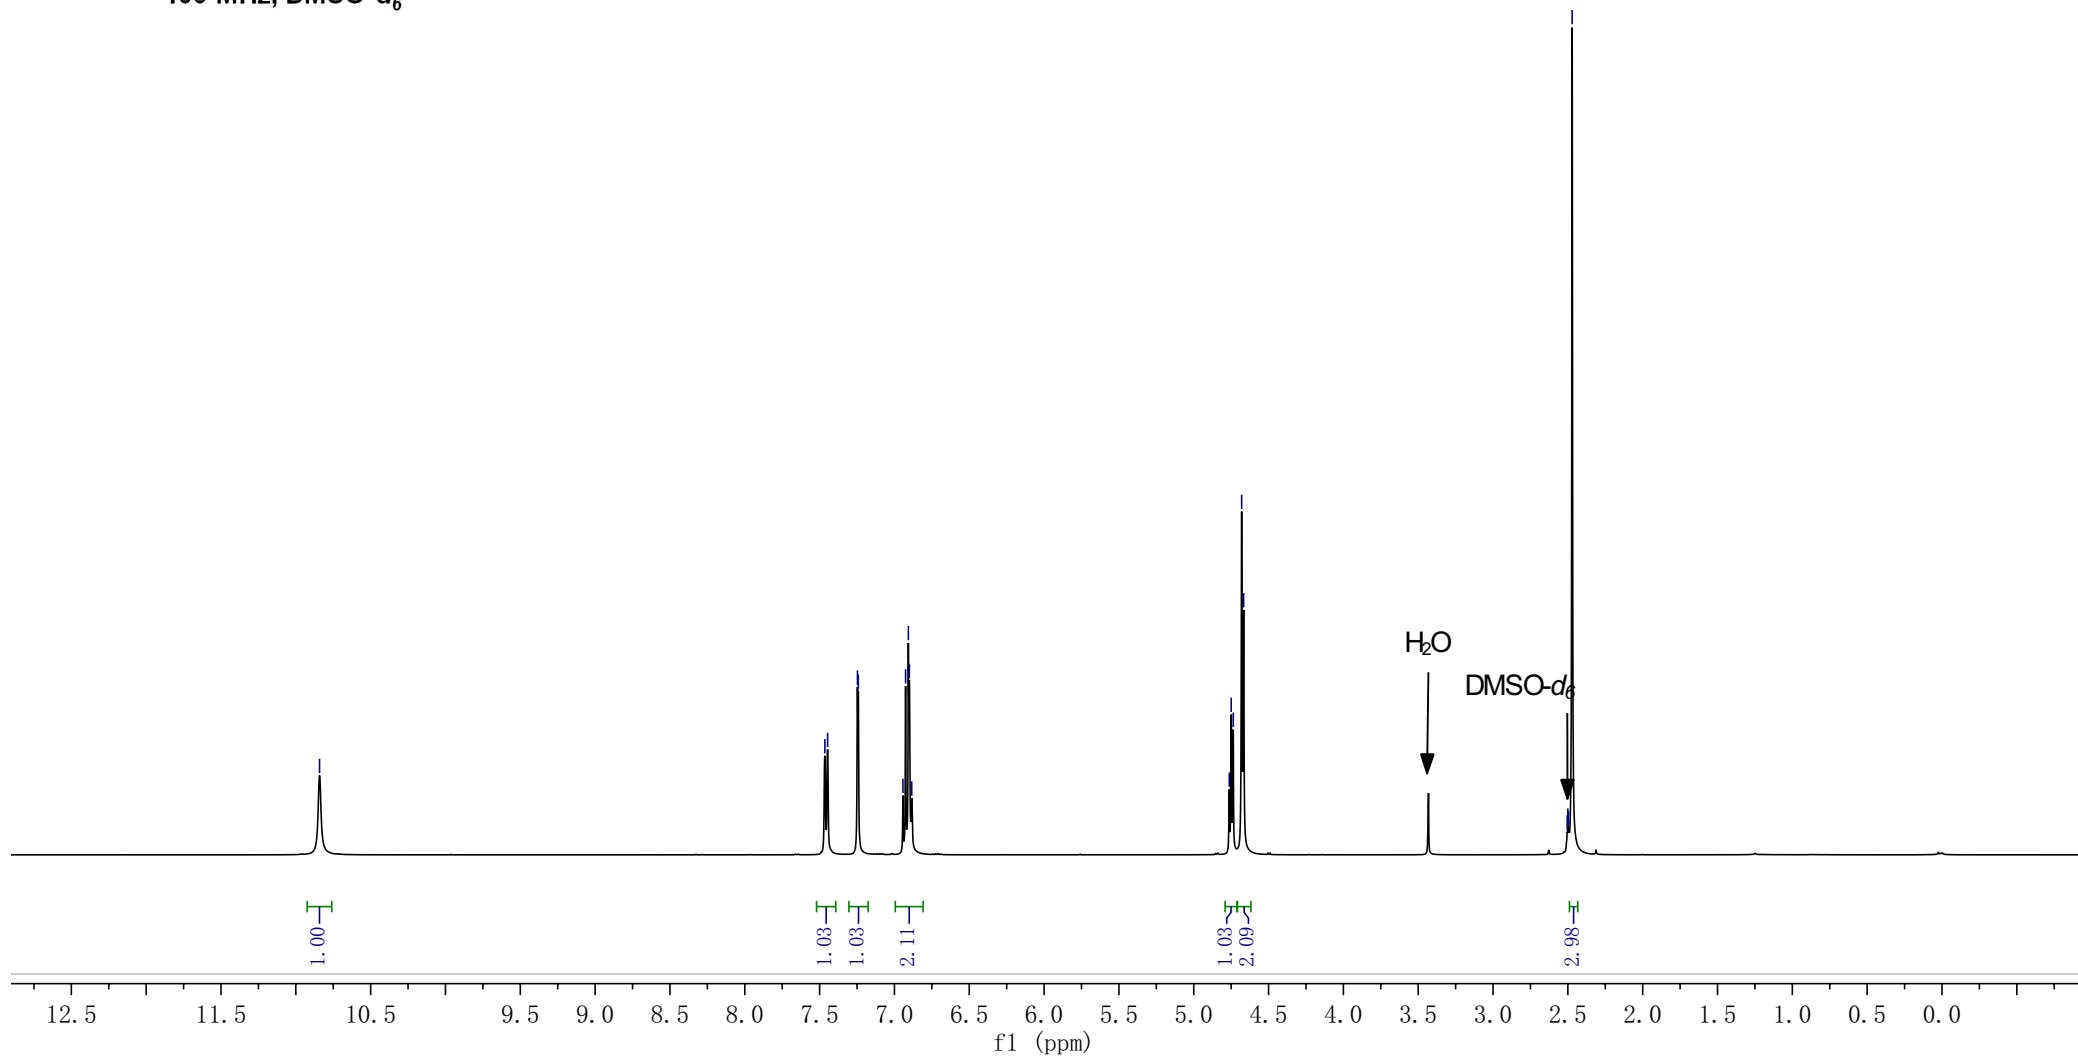



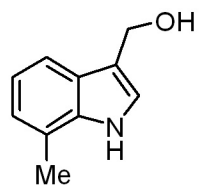

**1g**

<sup>13</sup>C NMR

101 MHz, DMSO-*d*<sub>6</sub>

135.97  
126.35  
123.01  
121.54  
120.39  
118.61  
116.55  
116.43

55.62

40.12  
39.92  
39.71  
39.50  
39.29  
39.08  
38.88

16.84

DMSO-*d*<sub>6</sub>

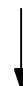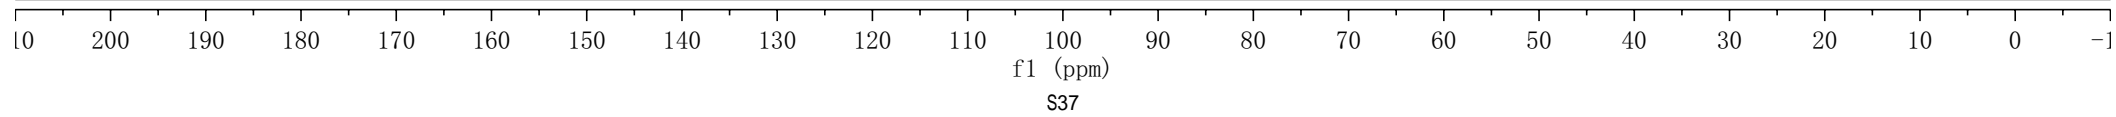

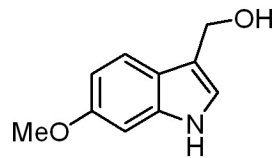

**1i**

**<sup>1</sup>H NMR**

**400 MHz, DMSO-*d*<sub>6</sub>**

—10.67

7.50  
7.48  
7.11  
7.10  
6.88  
6.87  
6.69  
6.68  
6.66  
6.66

—3.76

2.50  
2.50  
2.50

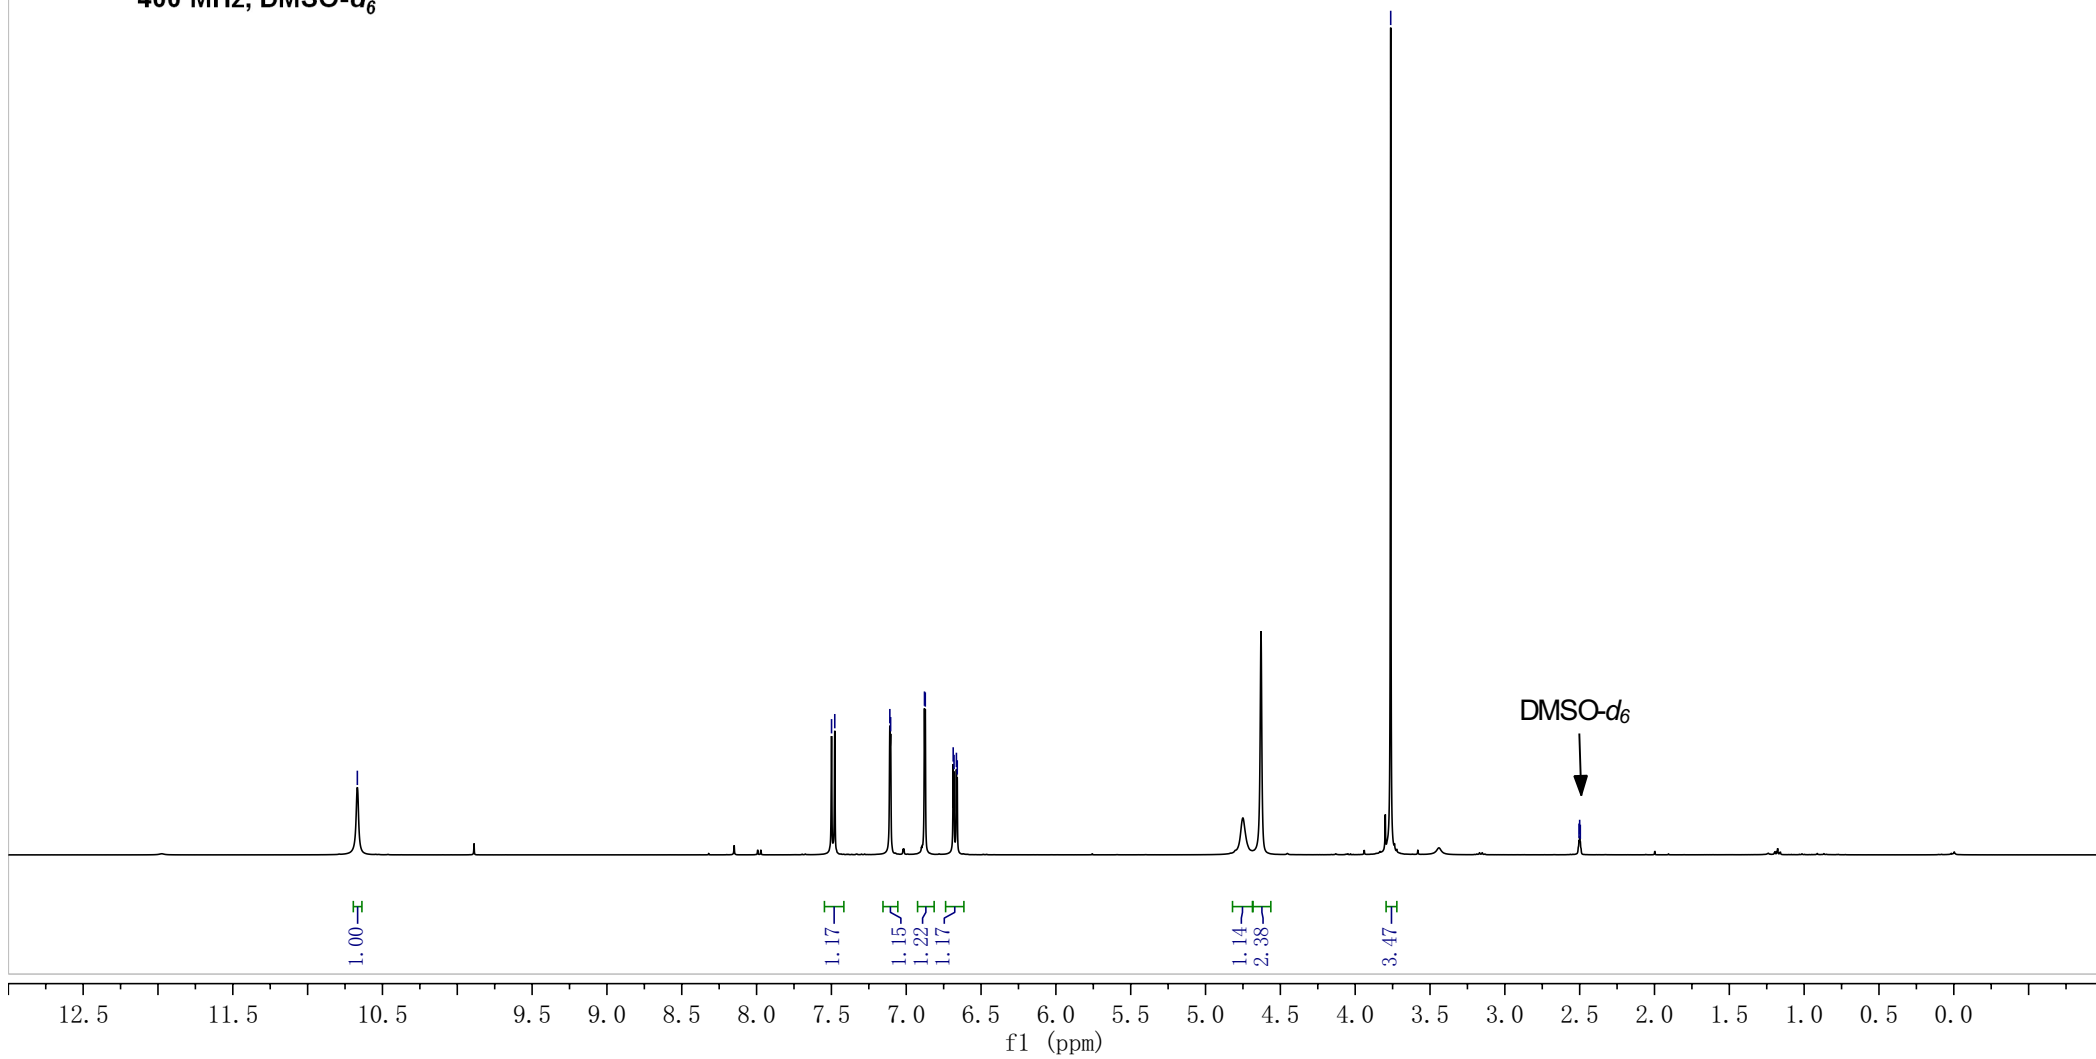

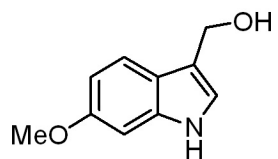

**1i**

**<sup>13</sup>C NMR**

**101 MHz, DMSO-*d*<sub>6</sub>**

155.55

137.16

121.88

121.08

119.53

116.00

108.61

94.43

55.63

55.12

40.13

39.92

39.71

39.50

39.29

39.08

38.87

DMSO-*d*<sub>6</sub>

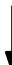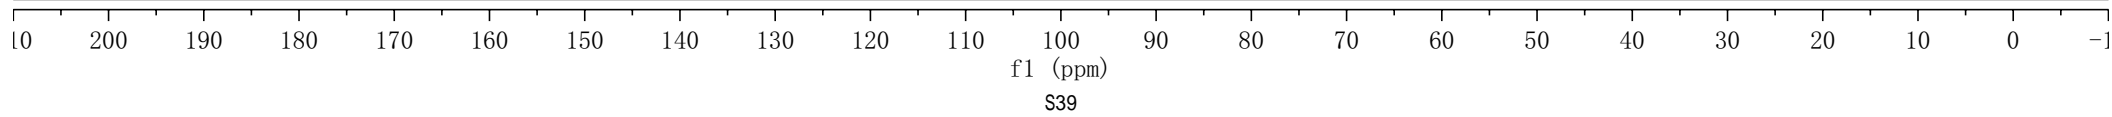

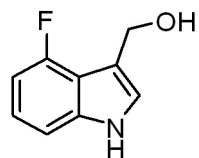

1j

<sup>1</sup>H NMR  
400 MHz, DMSO-d<sub>6</sub>

7.26  
7.20  
7.17  
7.05  
7.04  
7.03  
7.02  
7.01  
7.00  
6.74  
6.72  
6.71  
6.69

4.79  
4.70

2.50

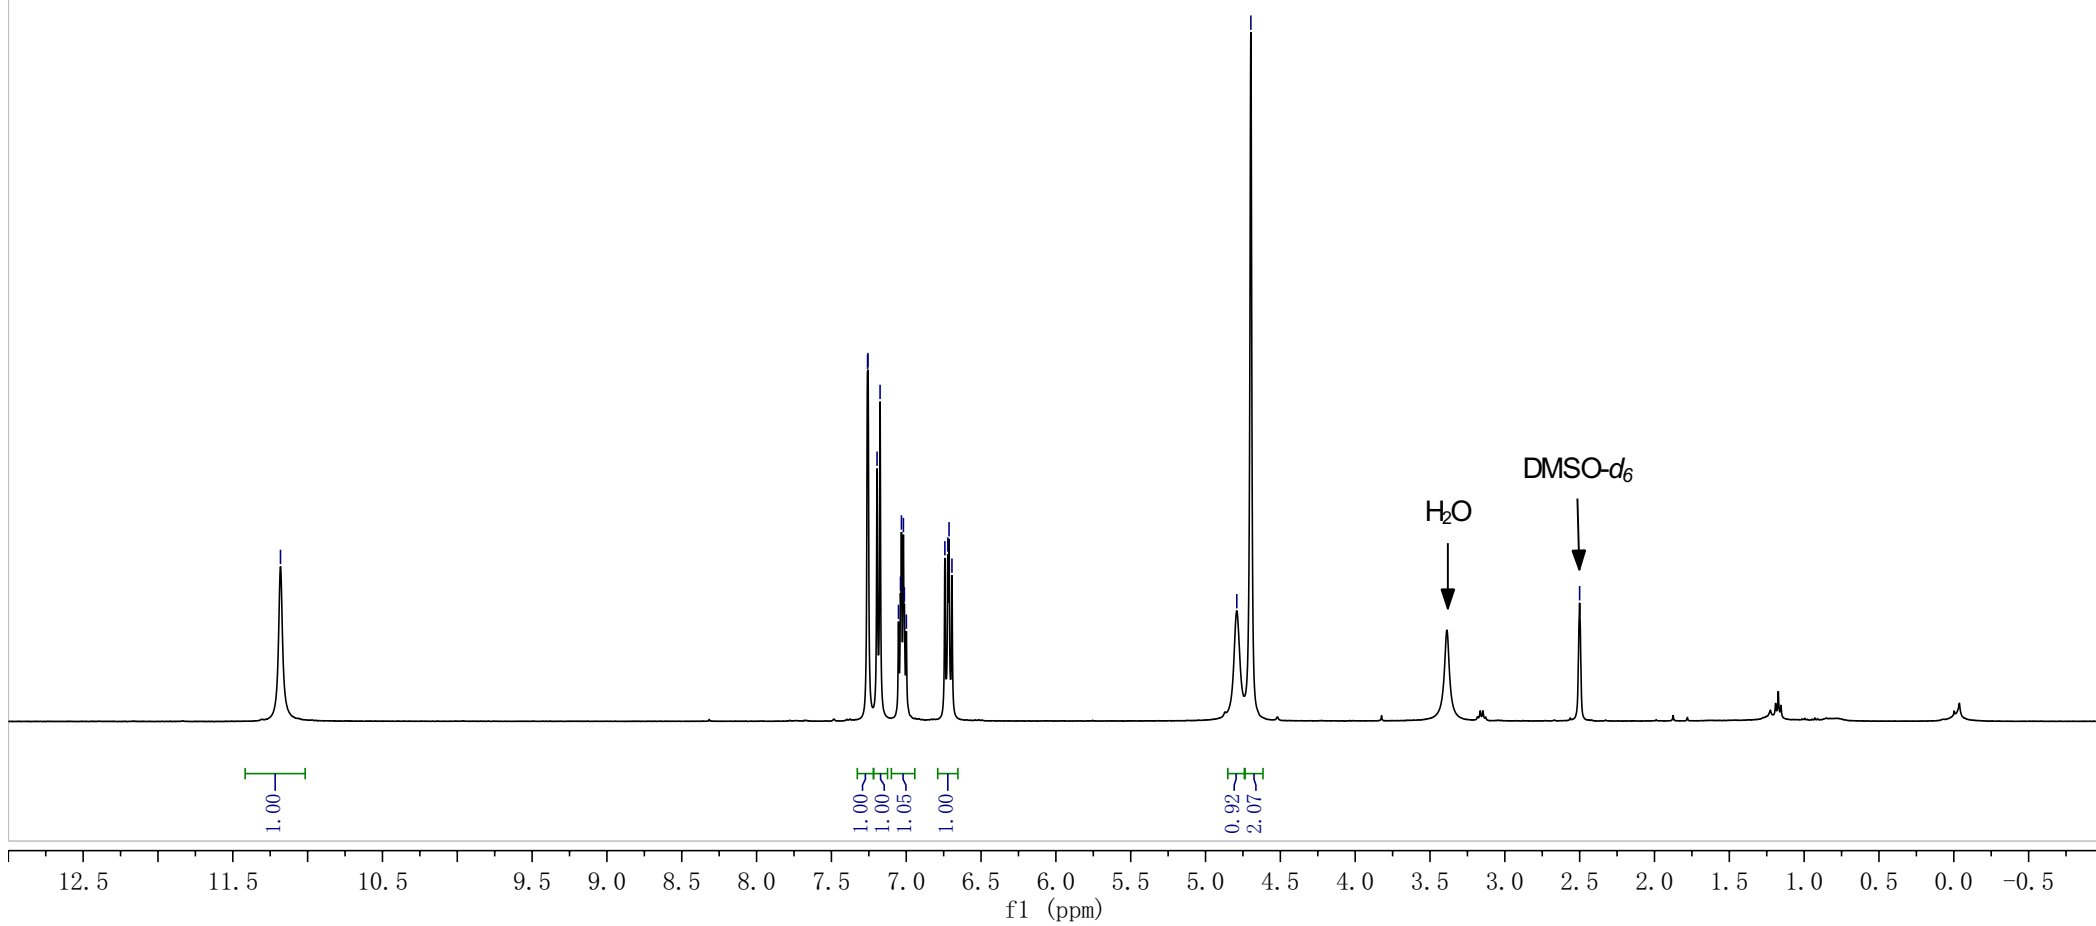

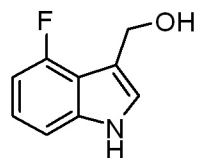

**1j**

**<sup>13</sup>C NMR**  
**101 MHz, DMSO-*d*<sub>6</sub>**

157.63  
155.21

139.39  
139.27

123.94  
121.56  
121.49

114.87  
114.66  
114.47

107.96  
107.92  
103.56  
103.37

56.04

40.13  
39.92  
39.71  
39.50  
39.29  
39.08  
38.88

DMSO-*d*<sub>6</sub>

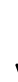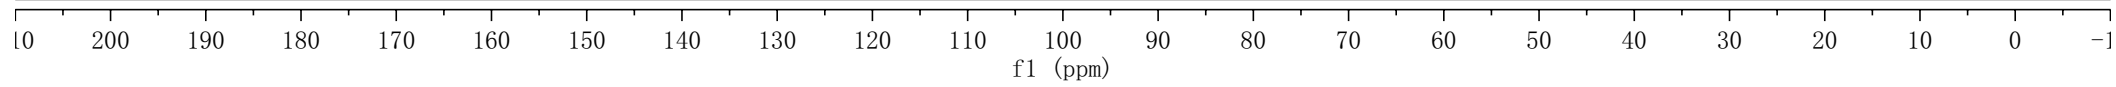

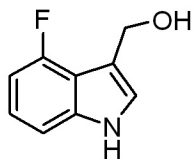

1j

<sup>19</sup>F NMR

376 MHz, DMSO-d<sub>6</sub>

-124.01

10 0 -10 -20 -30 -40 -50 -60 -70 -80 -90 -100 -110 -120 -130 -140 -150 -160 -170 -180 -190 -200 -210

f1 (ppm)

S42

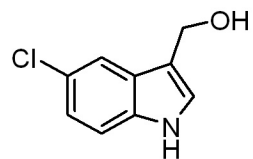

**1k**  
**<sup>1</sup>H NMR**  
**400 MHz, DMSO-*d*<sub>6</sub>**

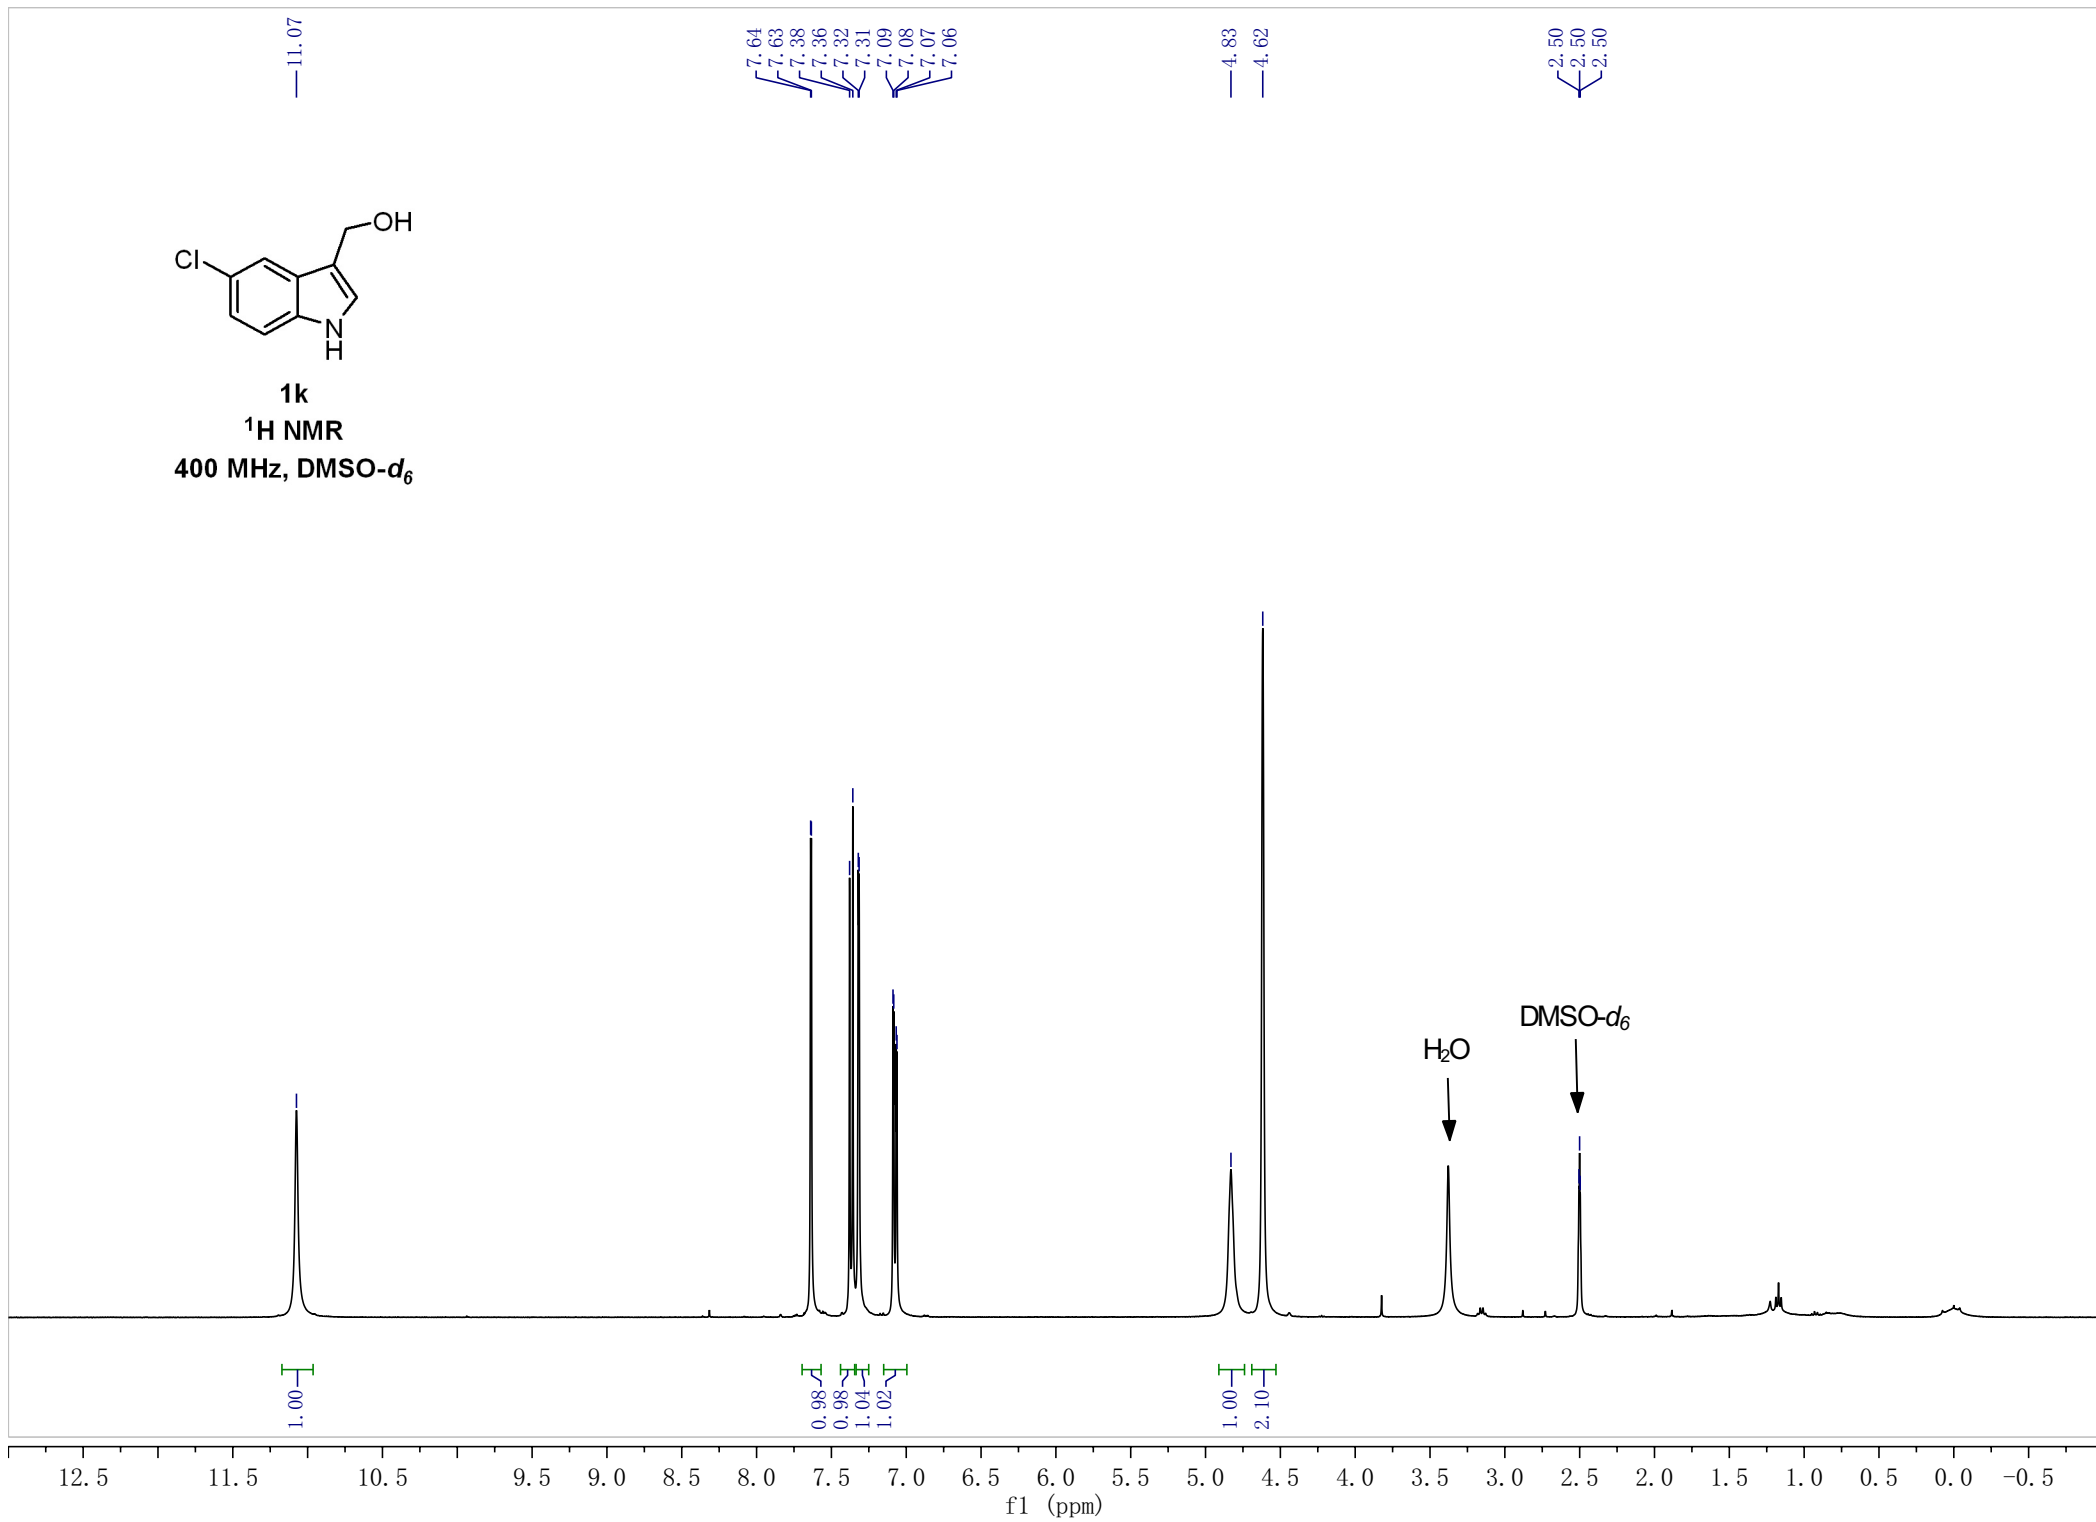

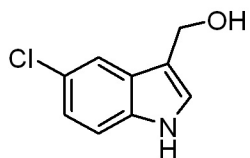

**1k**

**<sup>13</sup>C NMR**

**101 MHz, DMSO-*d*<sub>6</sub>**

134.86

127.81

125.06

123.06

120.91

118.25

115.93

112.86

55.21

40.13

39.92

39.71

39.50

39.29

39.08

38.87

DMSO-*d*<sub>6</sub>





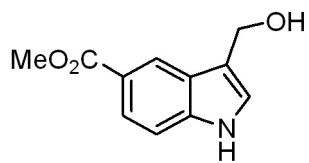

**1m**

**<sup>1</sup>H NMR**

**400 MHz, DMSO-*d*<sub>6</sub>**

— 11.29

— 8.36

— 7.75

— 7.72

— 7.45

— 7.43

— 7.37

— 4.92

— 4.68

— 3.85

— 2.50

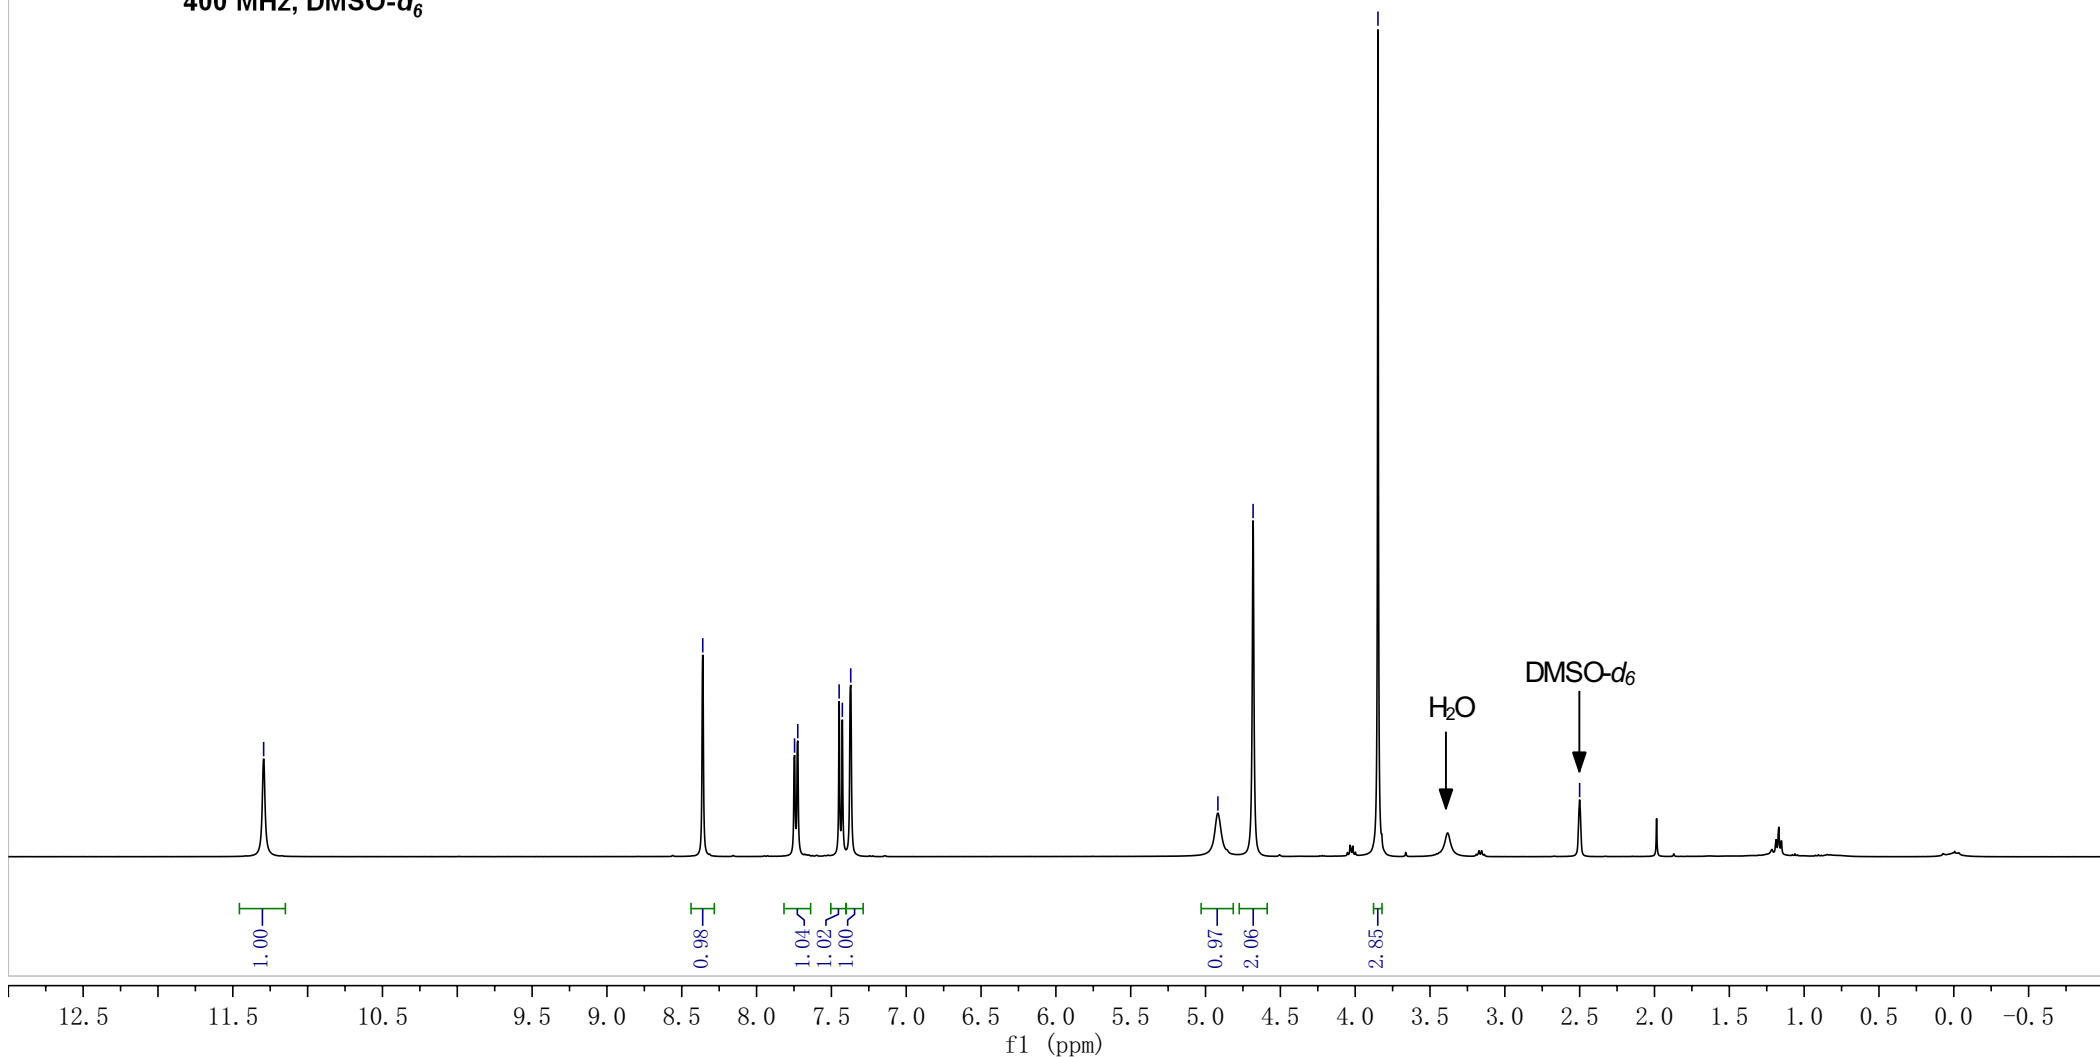

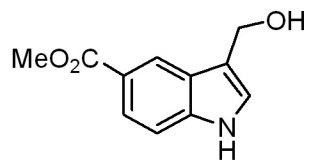

**1m**

**<sup>13</sup>C NMR**

**101 MHz, DMSO-*d*<sub>6</sub>**

167.37

139.09

126.29

125.05

122.11

121.82

119.91

117.51

111.32

55.25

51.61

40.13

39.92

39.71

39.50

39.29

39.08

38.88

DMSO-*d*<sub>6</sub>



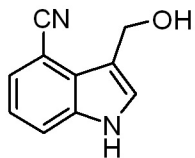

**1n**

**<sup>1</sup>H NMR**

**400 MHz, DMSO-*d*<sub>6</sub>**

11.55

7.73  
7.71  
7.55  
7.49  
7.48  
7.23  
7.22  
7.20

4.85

2.50  
2.50

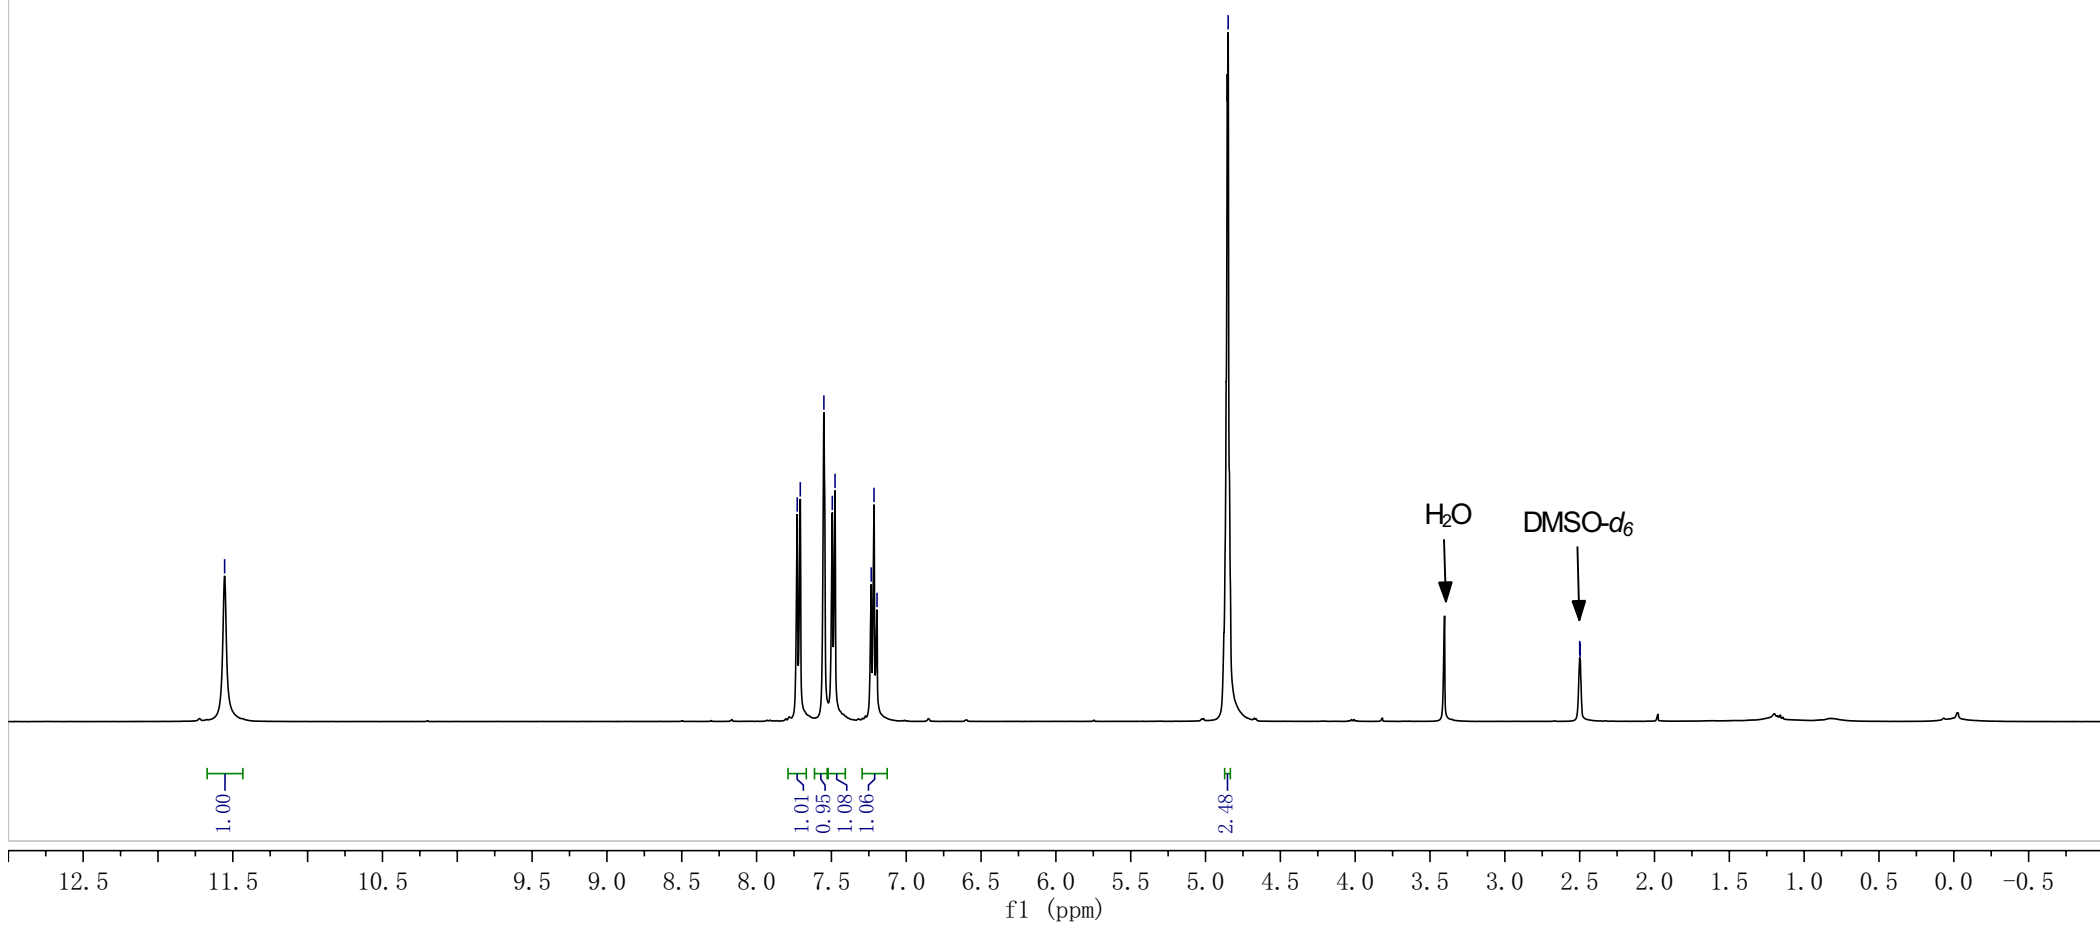

1.00

1.01  
0.95  
1.08  
1.06

2.48

H<sub>2</sub>O

DMSO-*d*<sub>6</sub>

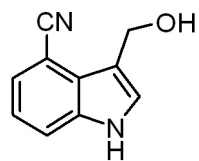

**1n**

<sup>13</sup>C NMR

101 MHz, DMSO-d<sub>6</sub>

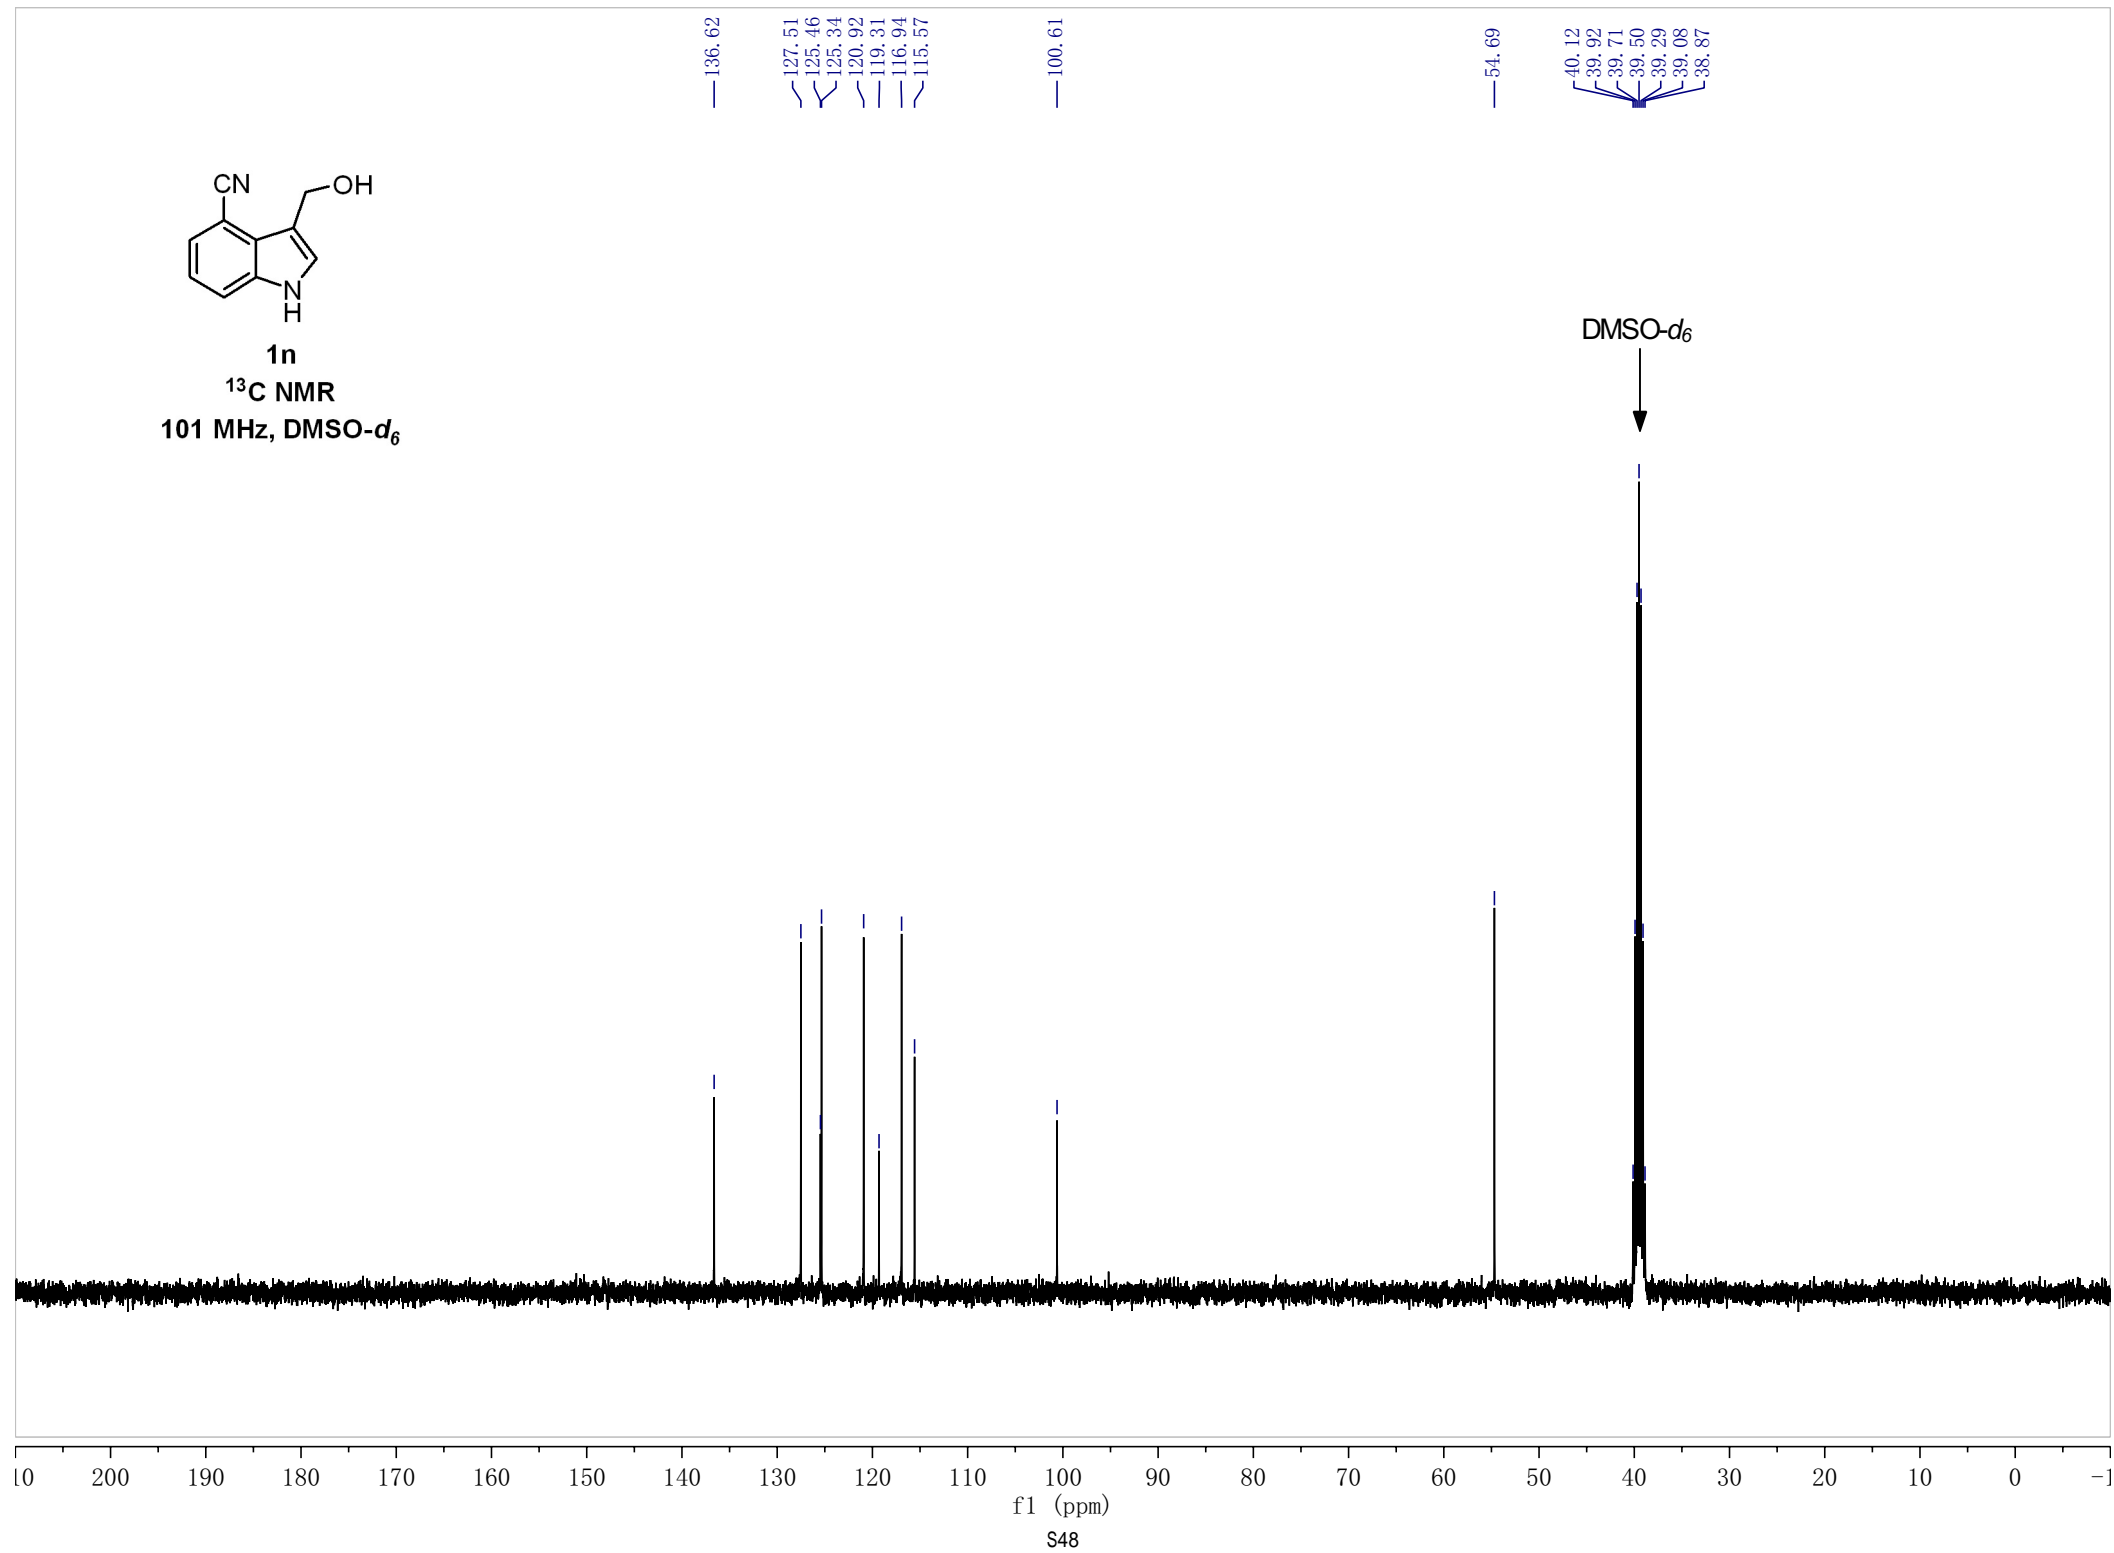

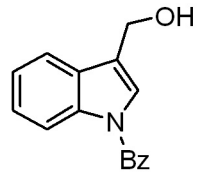

1p

<sup>1</sup>H NMR

400 MHz, CDCl<sub>3</sub>

8.27  
8.25  
7.58  
7.56  
7.55  
7.53  
7.50  
7.48  
7.46  
7.40  
7.38  
7.37  
7.30  
7.28  
7.26  
7.23  
7.21  
7.20  
7.15  
7.14

4.68

2.11

0.94

3.78

1.87

2.03

1.33

2.00

1.09

12.5 11.5 10.5 9.5 9.0 8.5 8.0 7.5 7.0 6.5 6.0 5.5 5.0 4.5 4.0 3.5 3.0 2.5 2.0 1.5 1.0 0.5 0.0 -0.5

f1 (ppm)

S49

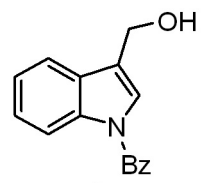

1p

<sup>13</sup>C NMR  
101 MHz, CDCl<sub>3</sub>

168.63

136.52  
134.31  
131.85  
129.41  
128.97  
128.54  
125.29  
124.97  
123.94  
121.83  
119.23  
116.51

77.32  
77.00  
76.68

56.98

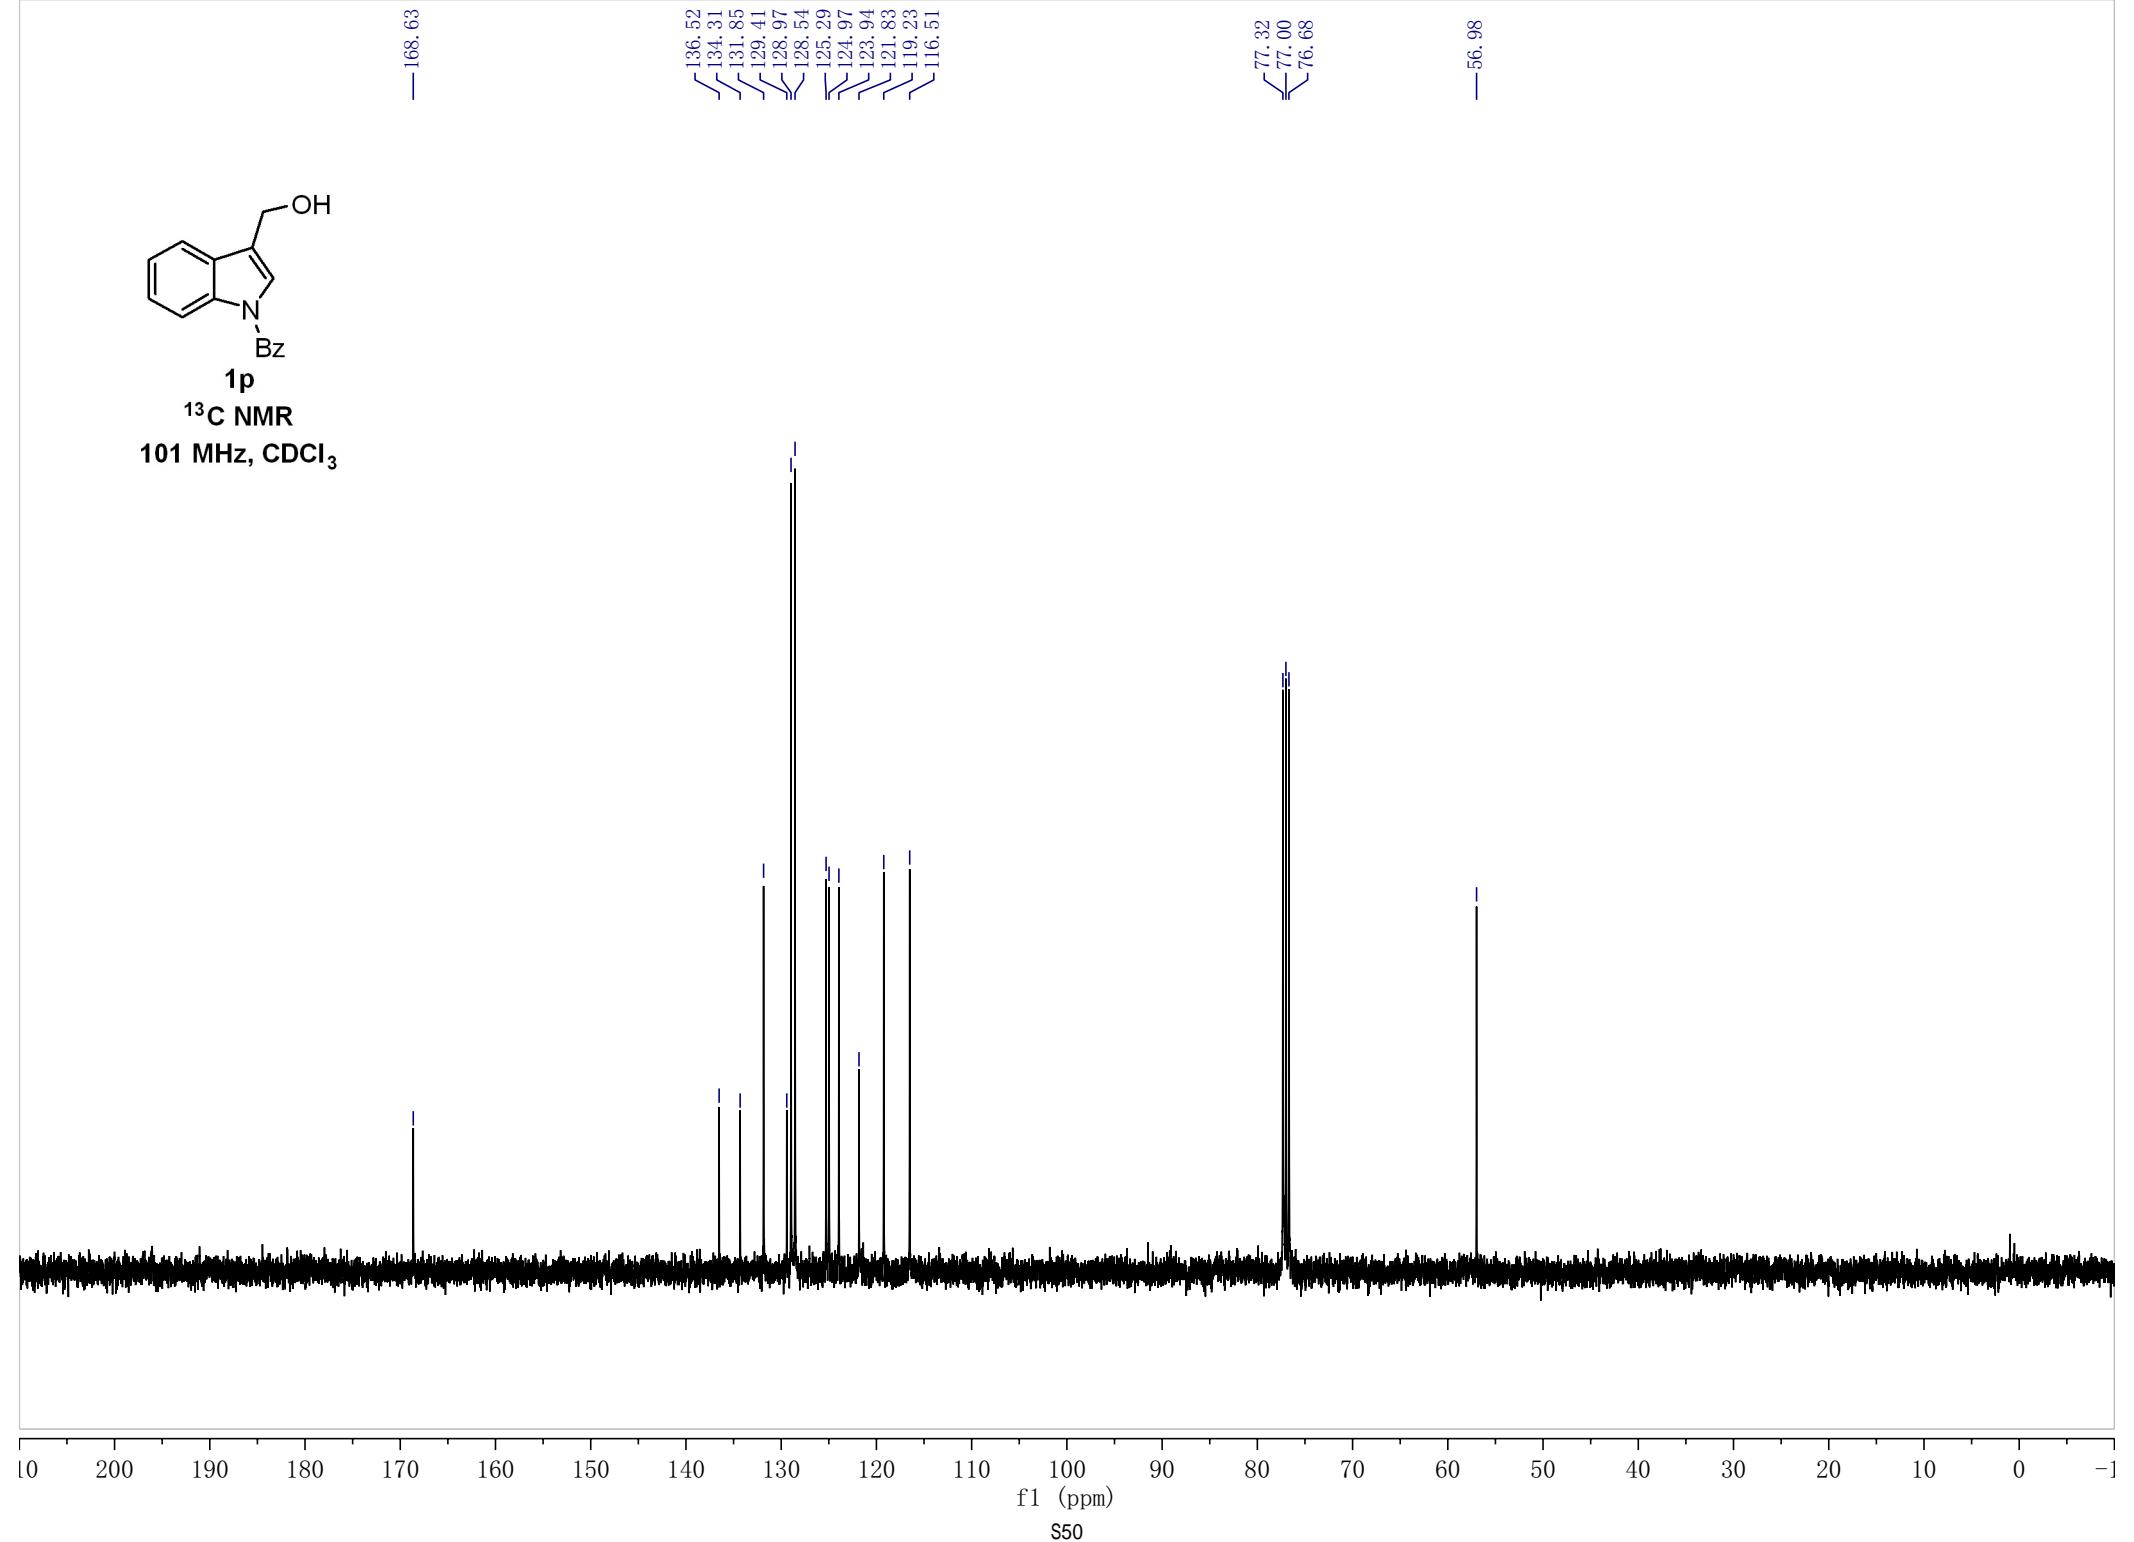

f1 (ppm)  
S50

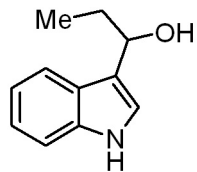

1s

<sup>1</sup>H NMR  
400 MHz, CDCl<sub>3</sub>

8.08  
7.68  
7.66  
7.25  
7.23  
7.13  
7.11  
7.09  
7.06  
7.04  
7.02  
6.97

4.85  
4.83  
4.82

0.90  
0.88  
0.87

0.00

1.16  
1.22  
1.02  
1.35  
1.45  
0.93

1.08

2.15

2.97

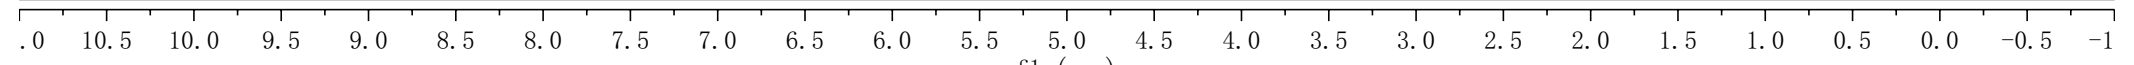

f1 (ppm)

S51

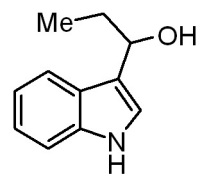

**1s**

**<sup>13</sup>C NMR**  
**101 MHz, CDCl<sub>3</sub>**

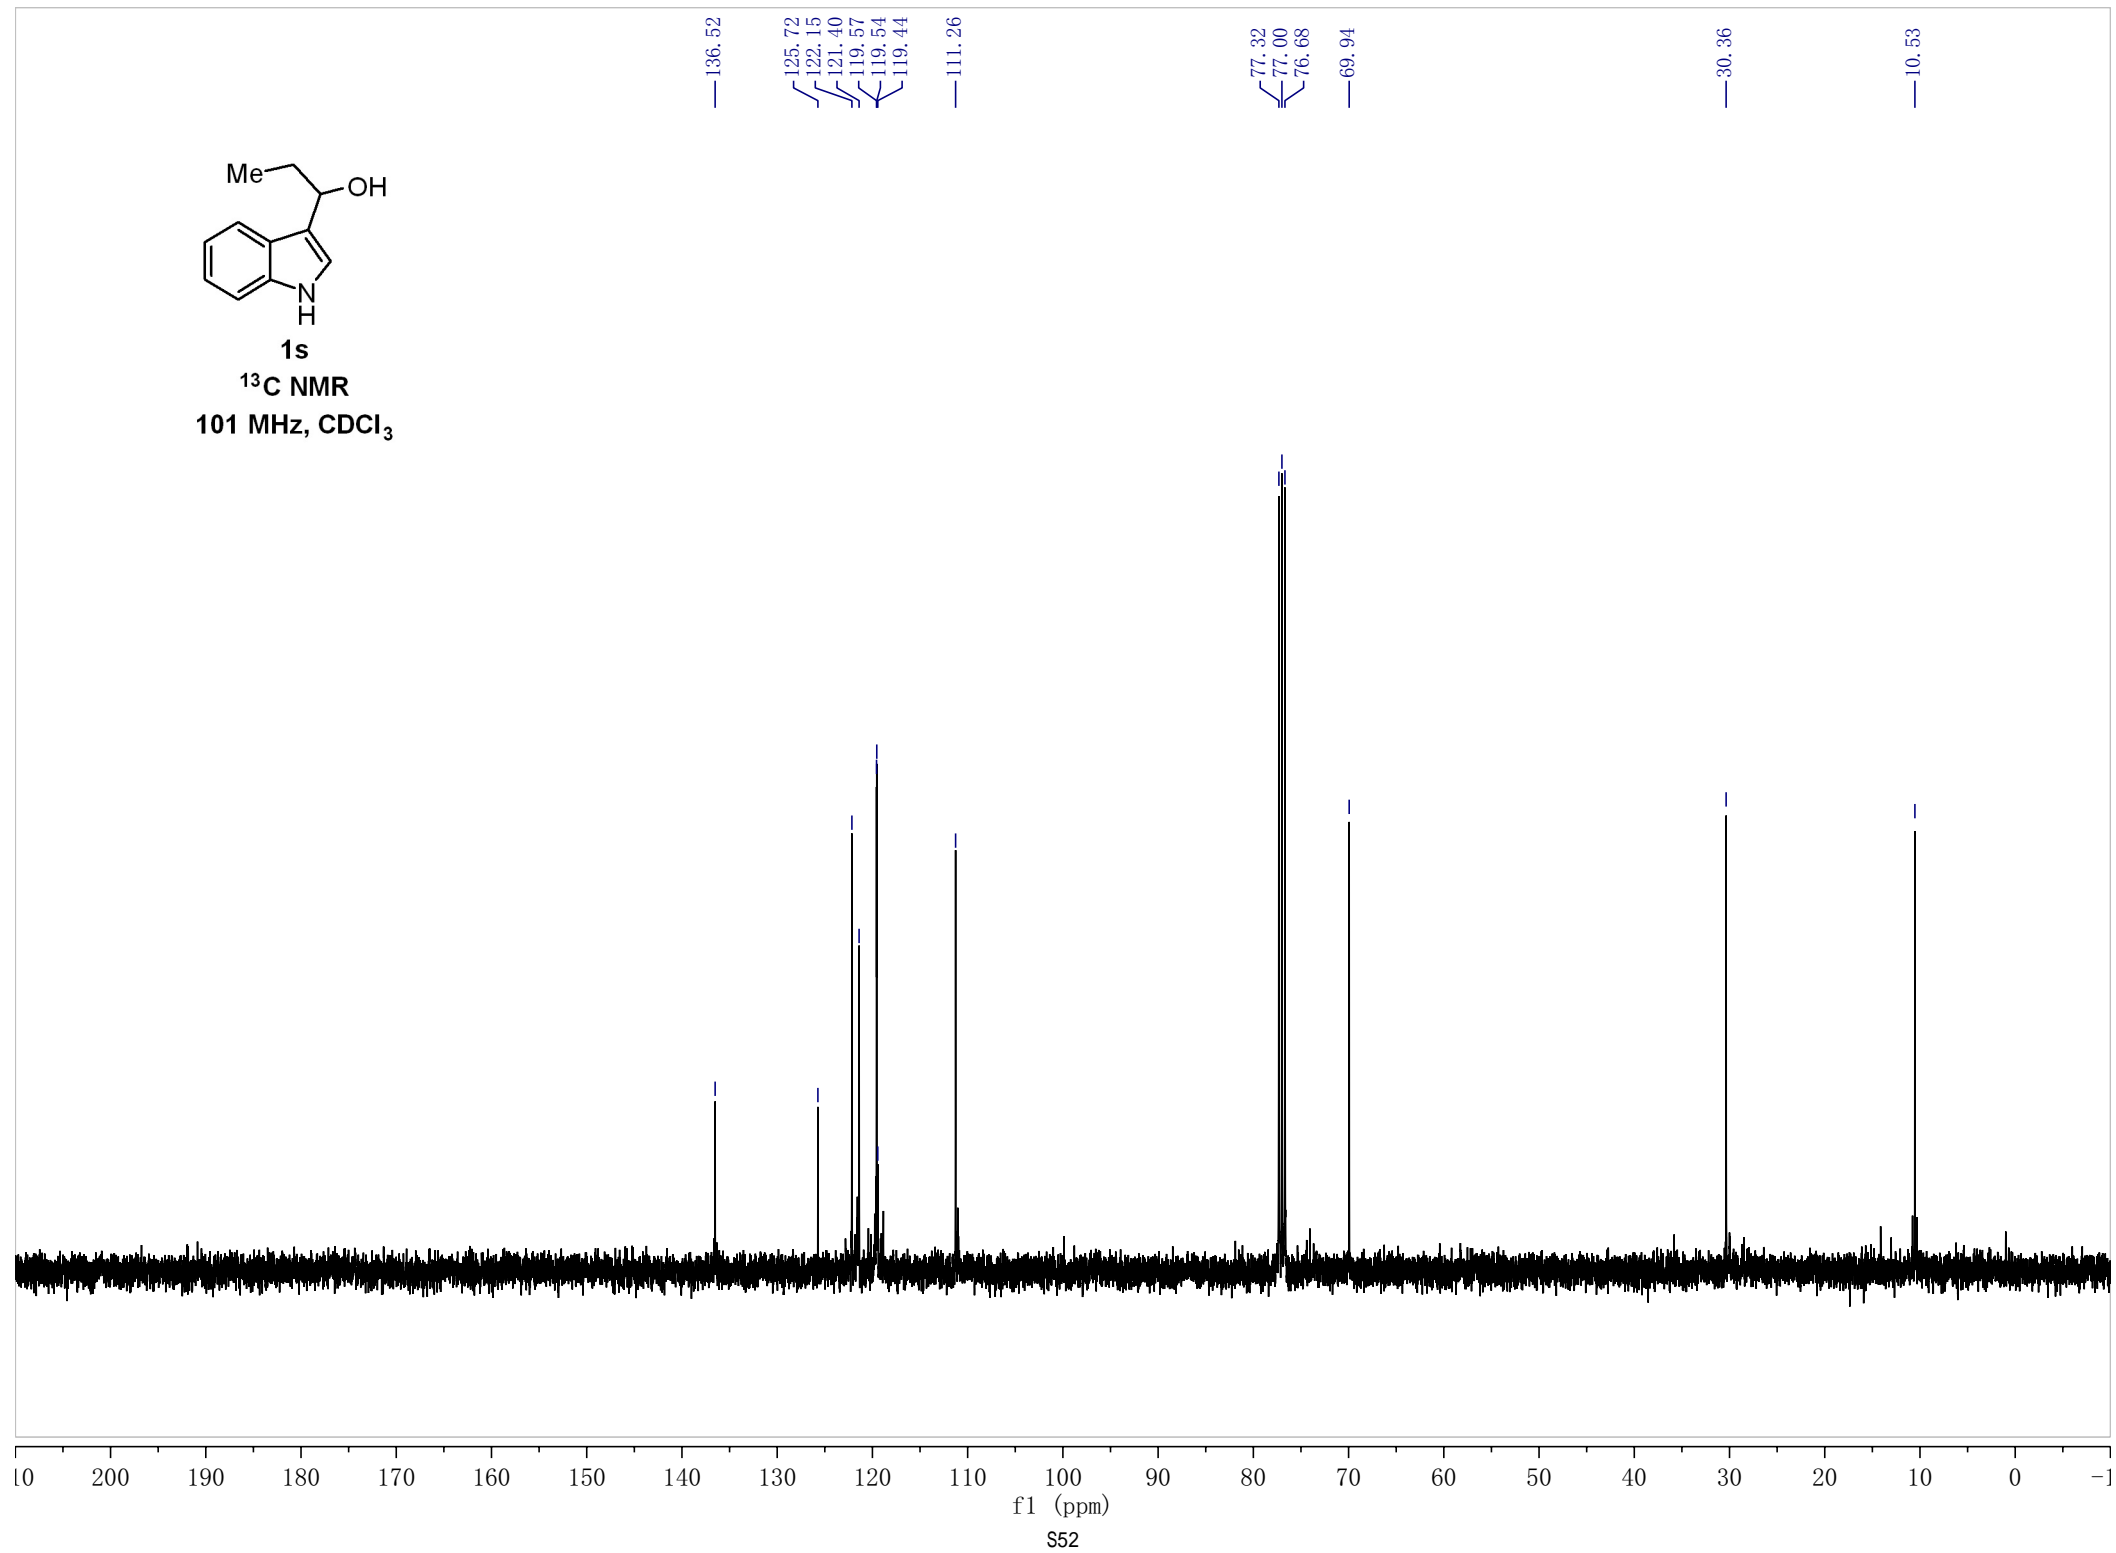



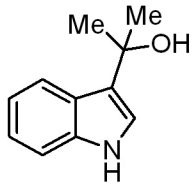

1u

<sup>1</sup>H NMR  
400 MHz, CDCl<sub>3</sub>

8.01  
7.83  
7.81  
7.27  
7.25  
7.16  
7.13  
7.12  
7.10  
7.07  
7.05  
7.03  
6.96  
6.95

1.92  
1.65

1.00  
1.24  
1.13  
2.56  
1.22

1.18  
6.04

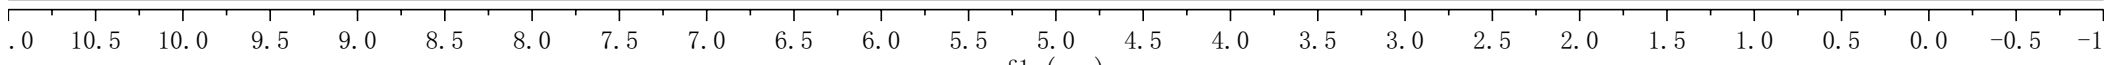

f1 (ppm)

S53

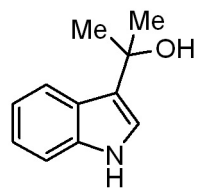

1u

<sup>13</sup>C NMR  
101 MHz, CDCl<sub>3</sub>

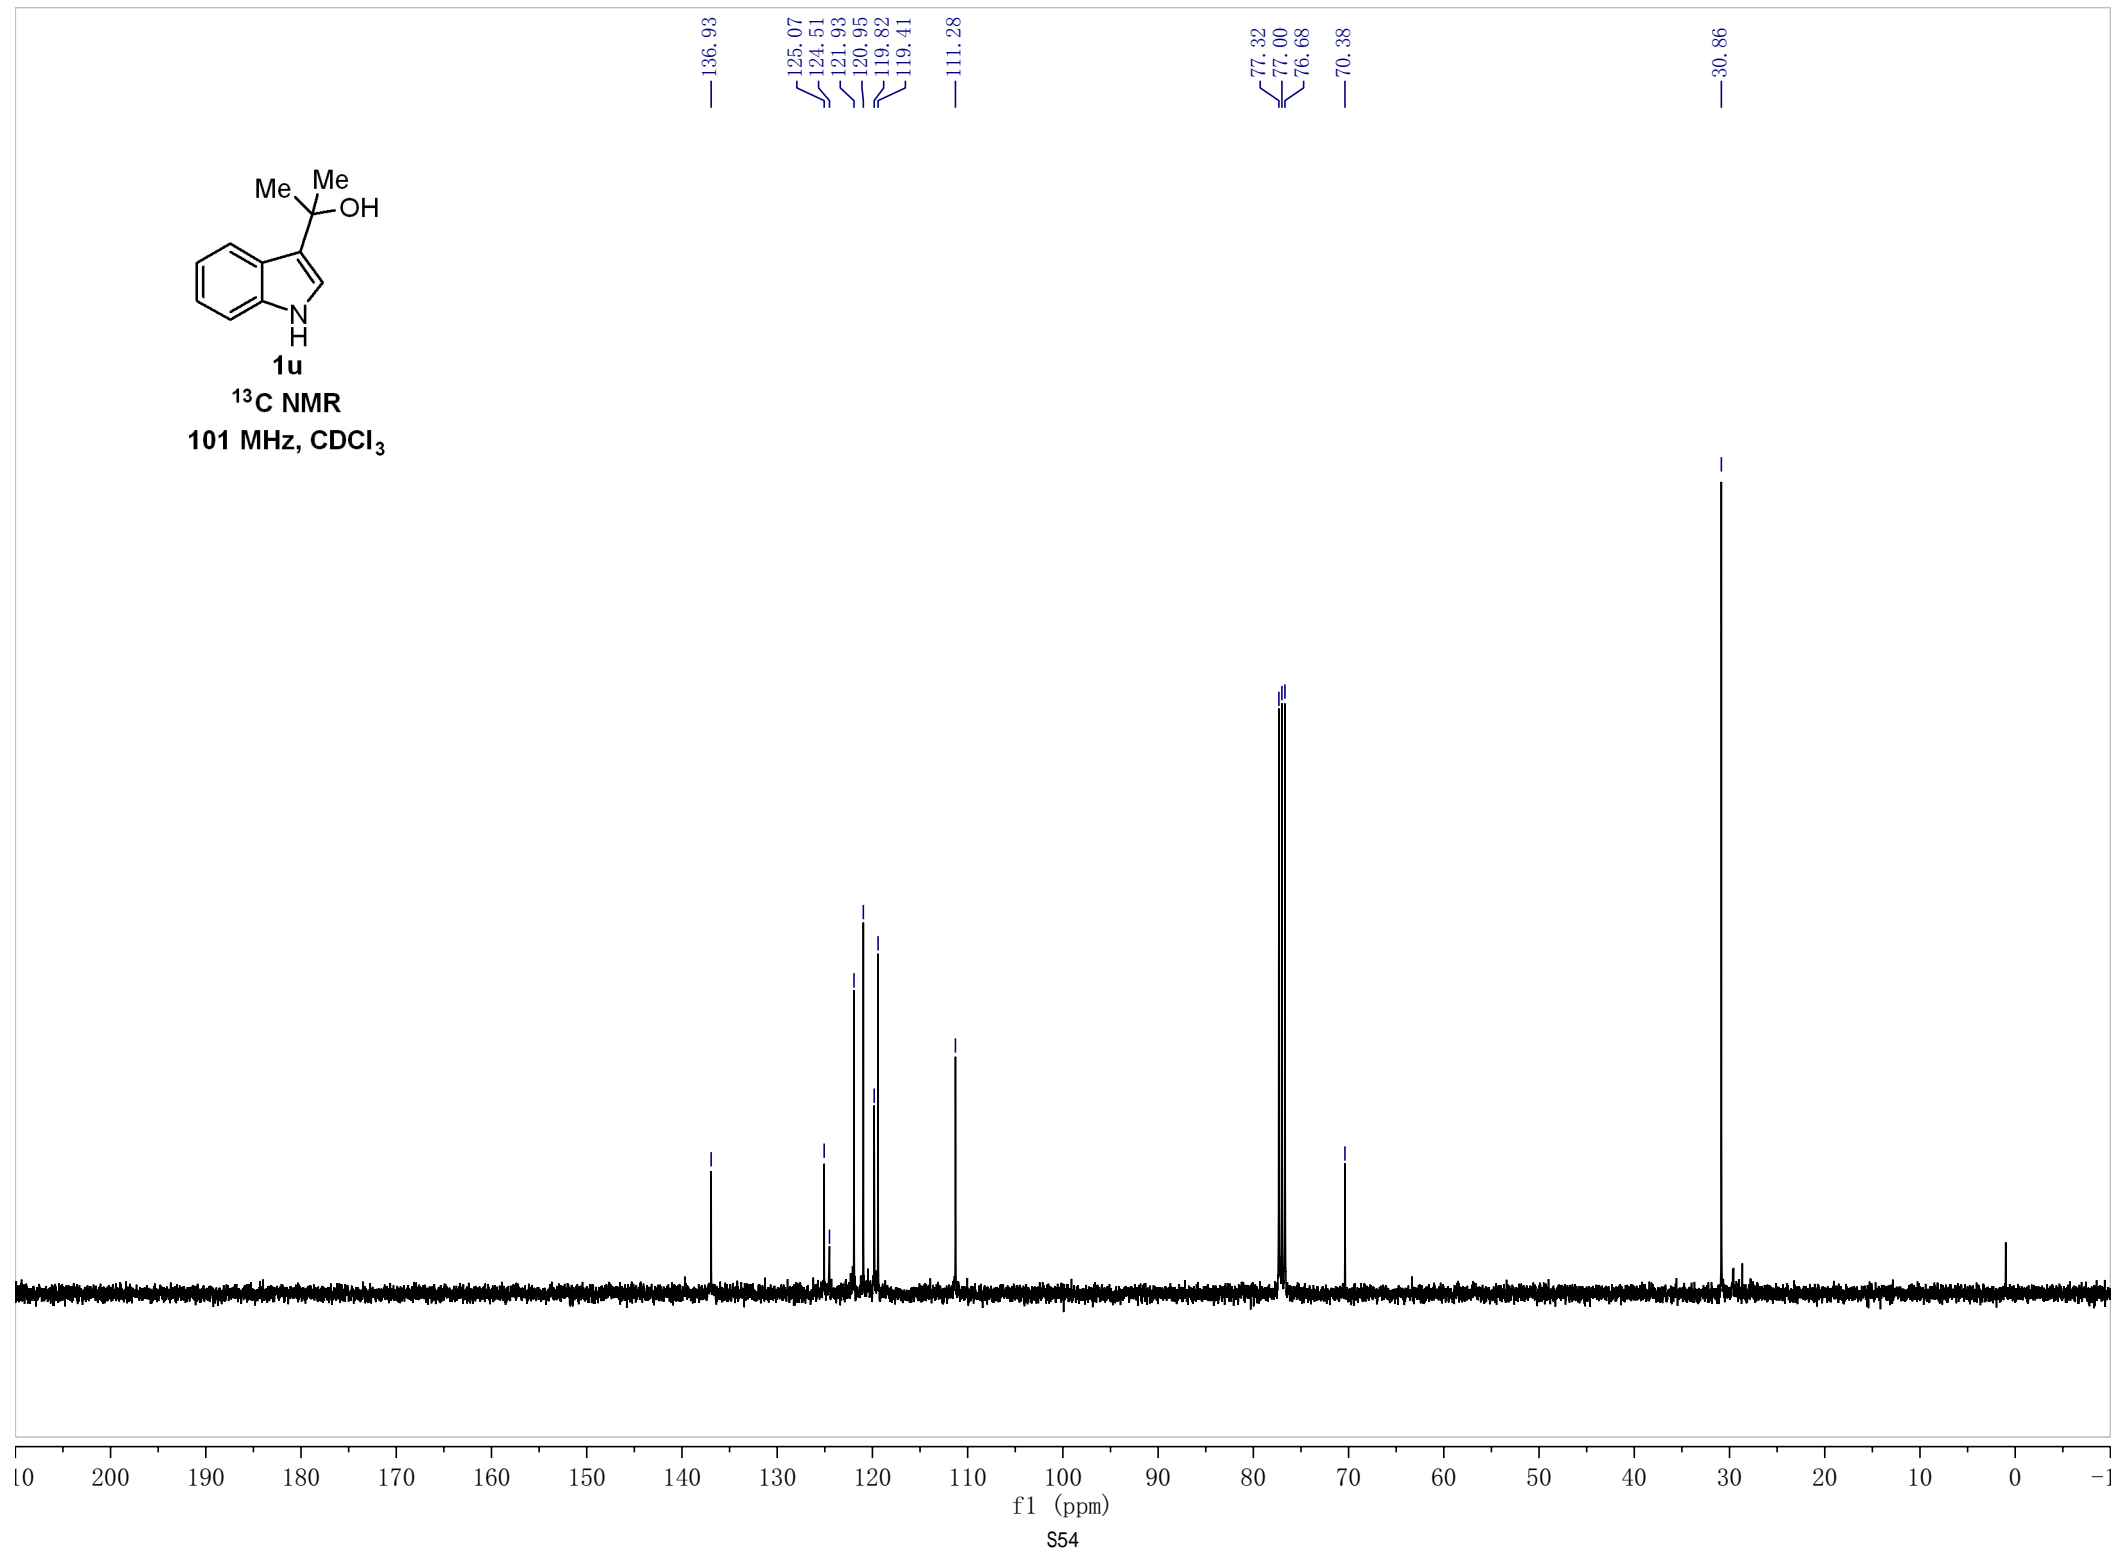

f1 (ppm)

S54



3aa

<sup>1</sup>H NMR  
400 MHz, CDCl<sub>3</sub>





**3aa**

<sup>13</sup>C NMR  
101 MHz, CDCl<sub>3</sub>

136.07  
127.32  
127.27  
124.09  
124.01  
121.63  
119.10  
118.56  
111.37  
103.96  
77.32  
77.00  
76.68  
62.09  
62.02  
23.68  
22.25  
16.33  
16.27



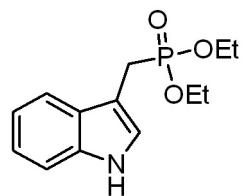

**3aa**

**$^{31}\text{P}$  NMR**  
**162 MHz,  $\text{CDCl}_3$**

—28.10

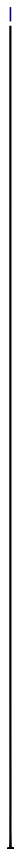

130 110 90 80 70 60 50 40 30 20 10 0 -10 -30 -50 -70 -90 -110 -130 -150 -170 -190 -210 -230

f1 (ppm)

S57

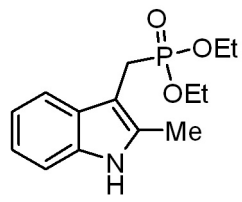

3ba

<sup>1</sup>H NMR  
400 MHz, CDCl<sub>3</sub>

8.65  
8.59  
7.54  
7.53  
7.53  
7.52  
7.51  
7.26  
7.22  
7.21  
7.21  
7.20  
7.20  
7.10  
7.08  
7.07  
7.06

4.05  
4.03  
4.02  
4.01  
4.00  
3.99  
3.99  
3.98  
3.97  
3.96  
3.95  
3.94  
3.93  
3.92  
3.90  
3.26  
3.21

2.28  
2.27  
2.26

1.23  
1.21  
1.19

1.00

1.03

1.03

2.12

4.15

2.11

3.15

6.32

.0 10.5 10.0 9.5 9.0 8.5 8.0 7.5 7.0 6.5 6.0 5.5 5.0 4.5 4.0 3.5 3.0 2.5 2.0 1.5 1.0 0.5 0.0 -0.5 -1

f1 (ppm)

S58

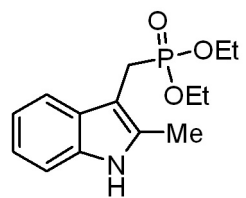

**3ba**

<sup>13</sup>C NMR  
101 MHz, CDCl<sub>3</sub>

135.20  
133.30  
128.40

120.82  
119.07  
118.08

110.34

99.92

77.32  
77.00  
76.68

61.93  
61.86

23.39  
21.95

16.39  
16.33  
11.62

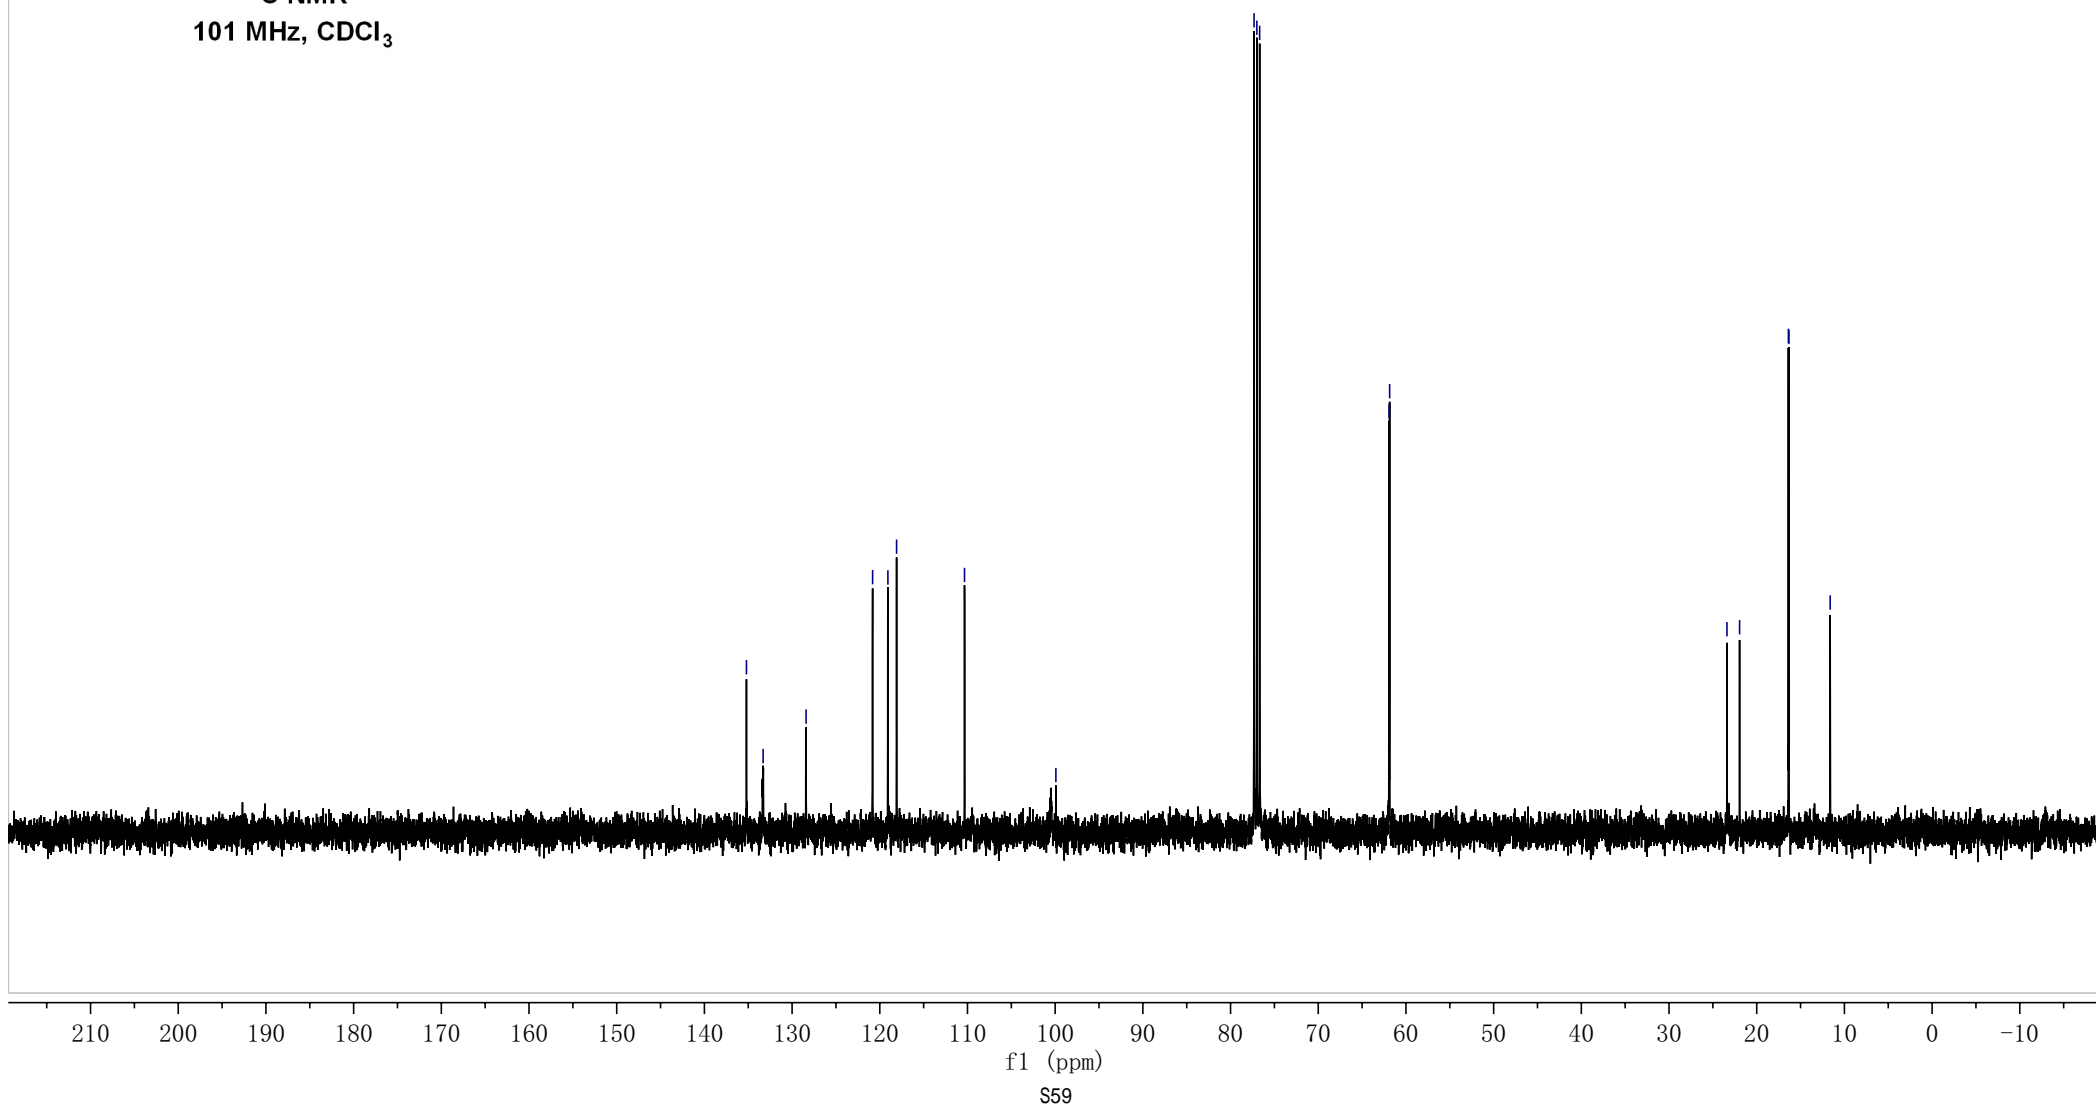

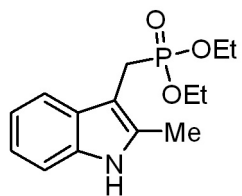

**3ba**

**<sup>31</sup>P NMR**  
**162 MHz, CDCl<sub>3</sub>**

—27.70

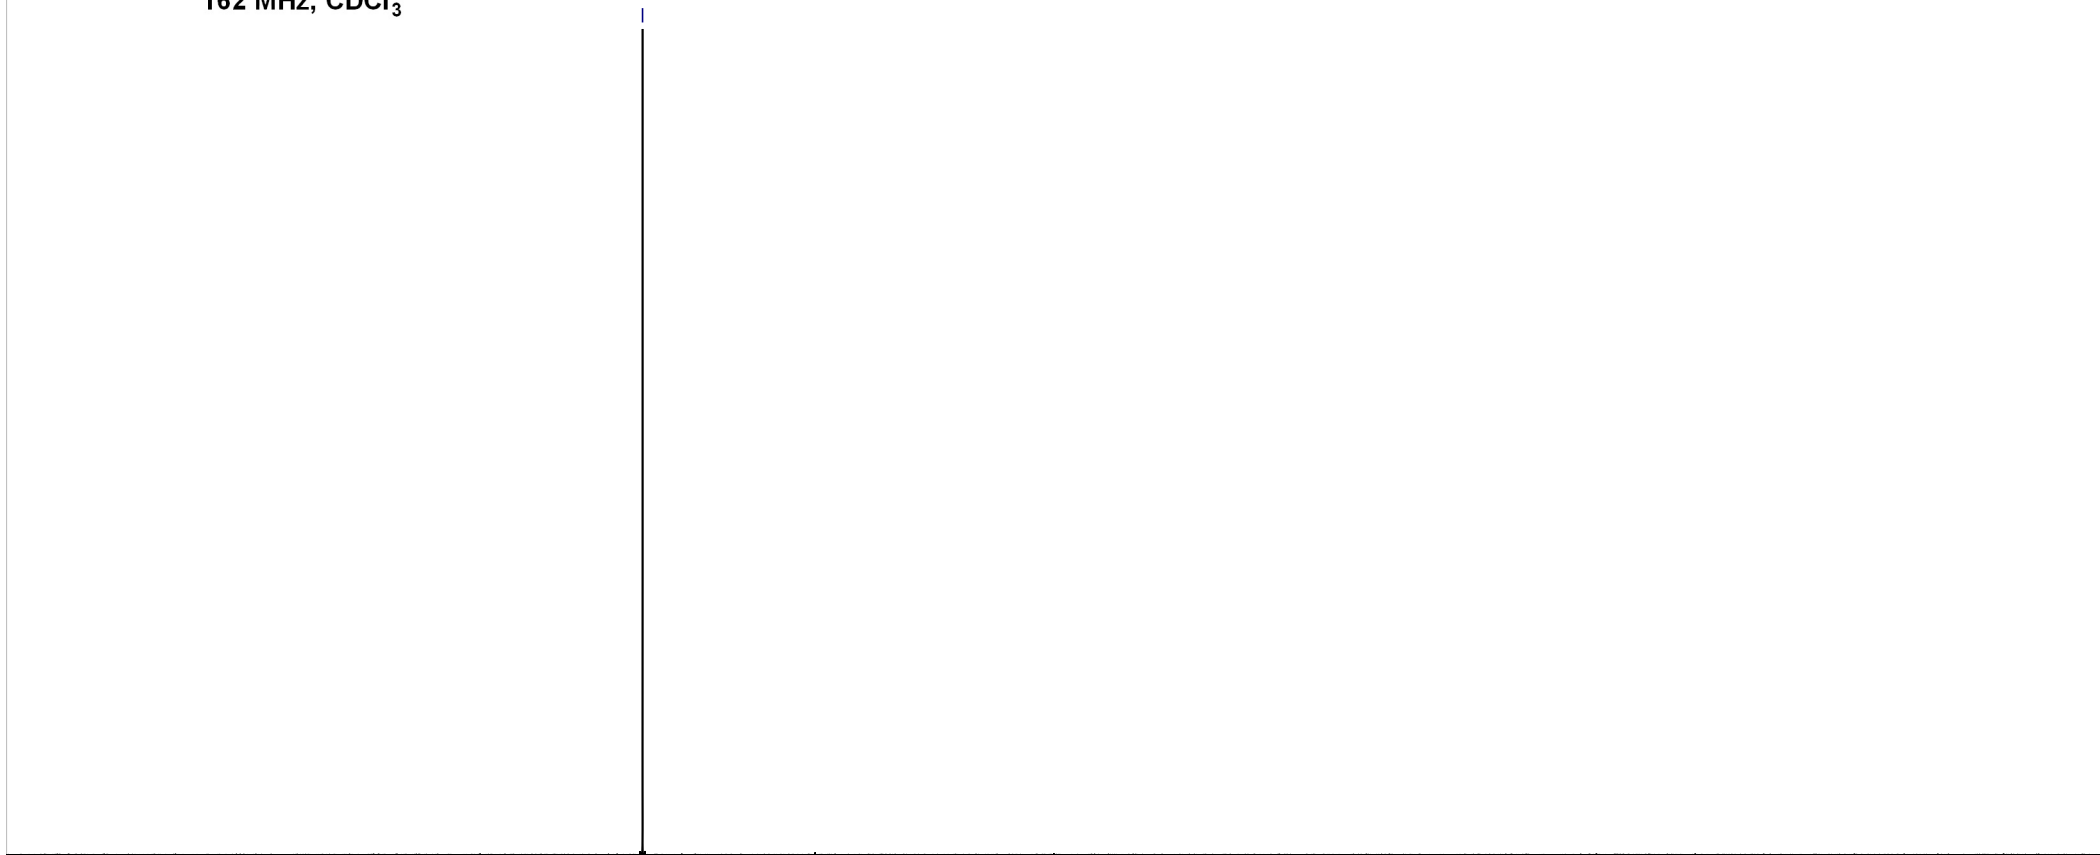

130 110 90 80 70 60 50 40 30 20 10 0 -10 -30 -50 -70 -90 -110 -130 -150 -170 -190 -210 -230

f1 (ppm)

S60



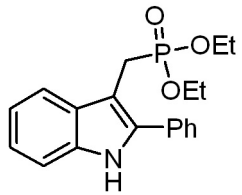

3ca

<sup>1</sup>H NMR

400 MHz, CDCl<sub>3</sub>

8.77  
8.70

7.78  
7.76  
7.45  
7.43  
7.42  
7.37  
7.35  
7.33  
7.26  
7.21  
7.19  
7.17  
7.16  
7.14  
7.12

4.06  
4.04  
4.02  
4.00  
3.98  
3.96  
3.94  
3.92  
3.91  
3.90  
3.88  
3.44  
3.39

1.20  
1.19  
1.17

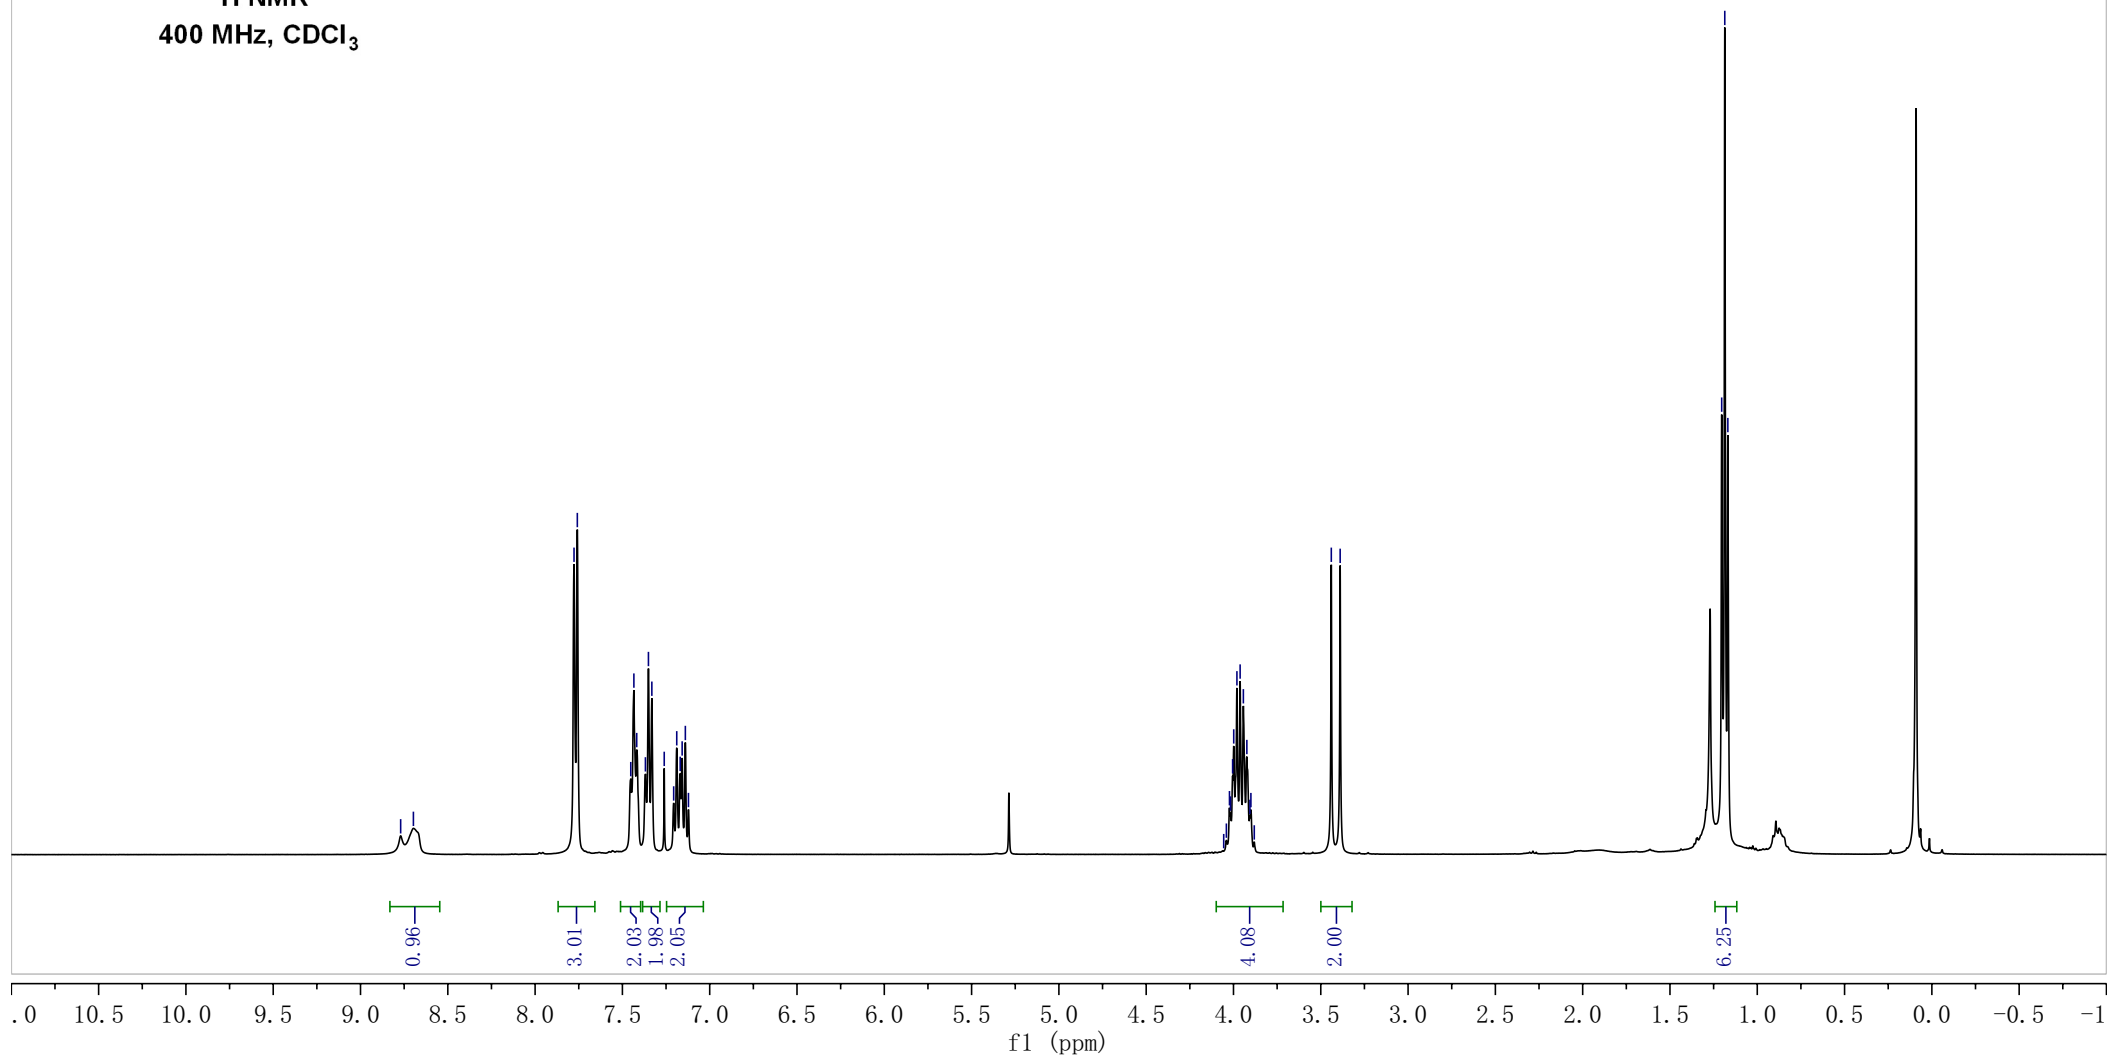

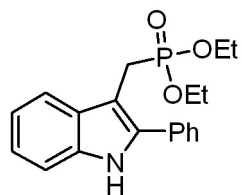

**3ca**

<sup>13</sup>C NMR  
101 MHz, CDCl<sub>3</sub>

136.26  
135.84  
132.53  
128.80  
128.32  
127.83

122.32  
120.00  
119.61

110.79

102.43  
99.92

77.32  
77.00  
76.68

62.00  
61.93

29.65

24.29  
22.85

16.35  
16.29

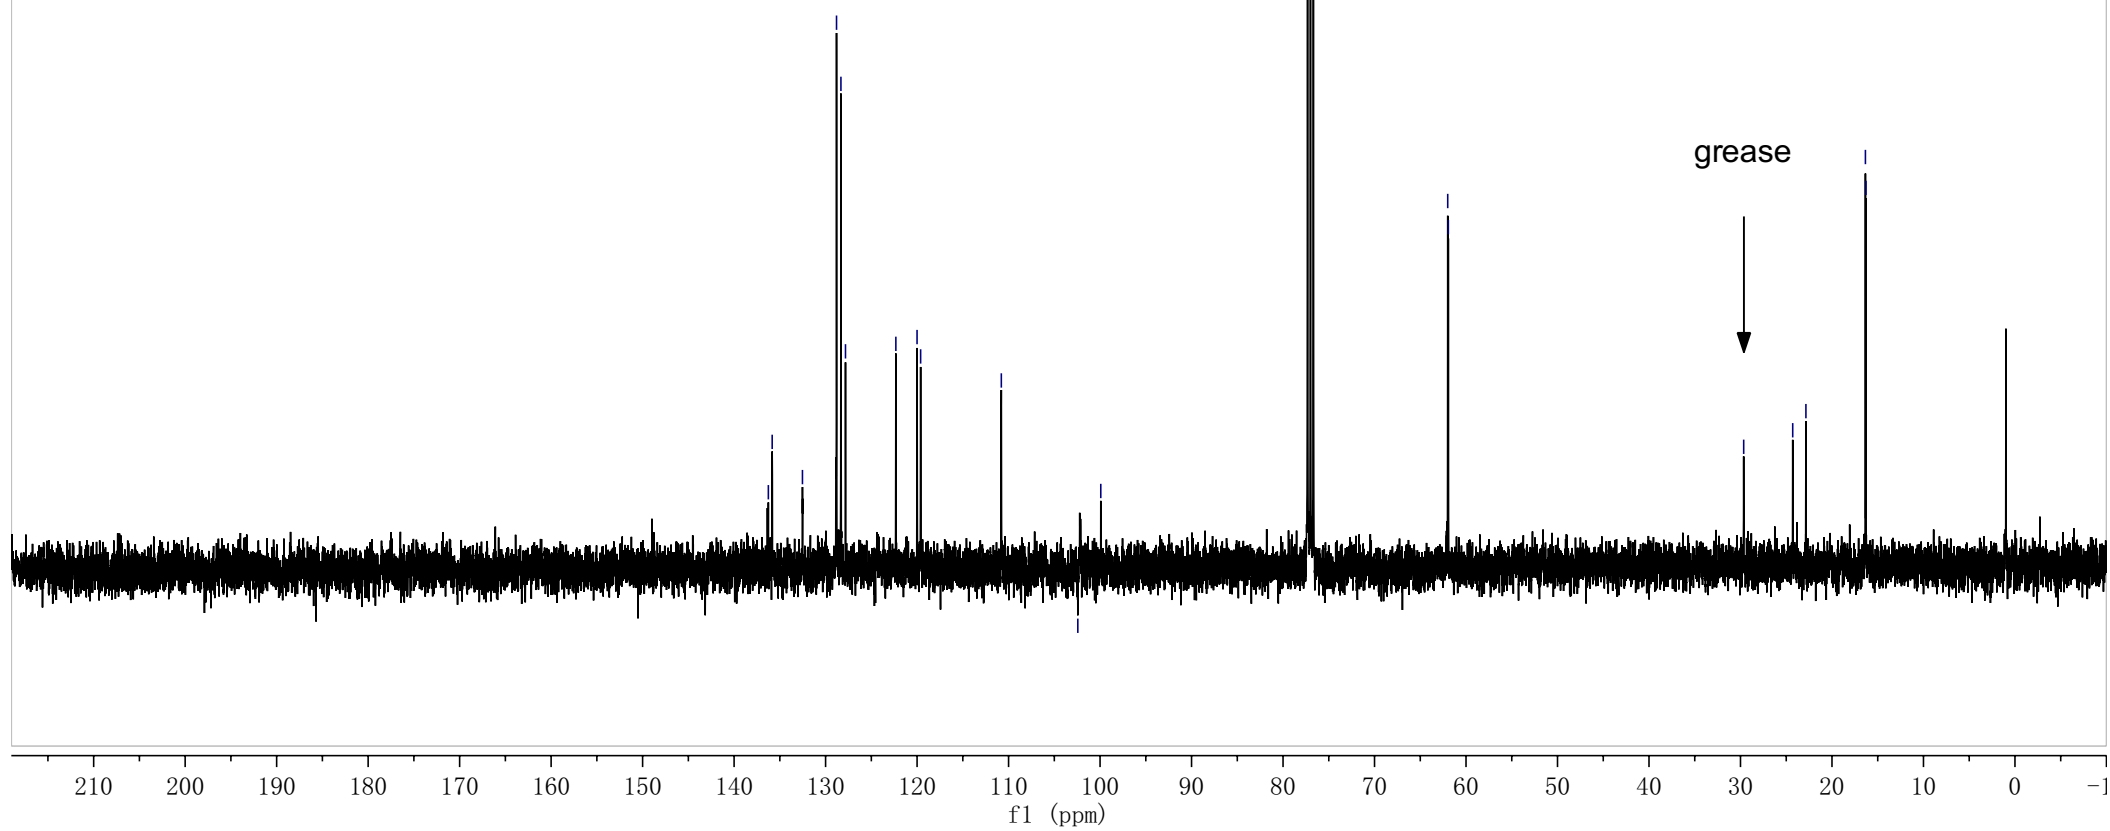

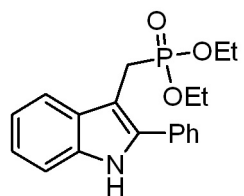

**3ca**

**<sup>31</sup>P NMR**

**162 MHz, CDCl<sub>3</sub>**

—27.48

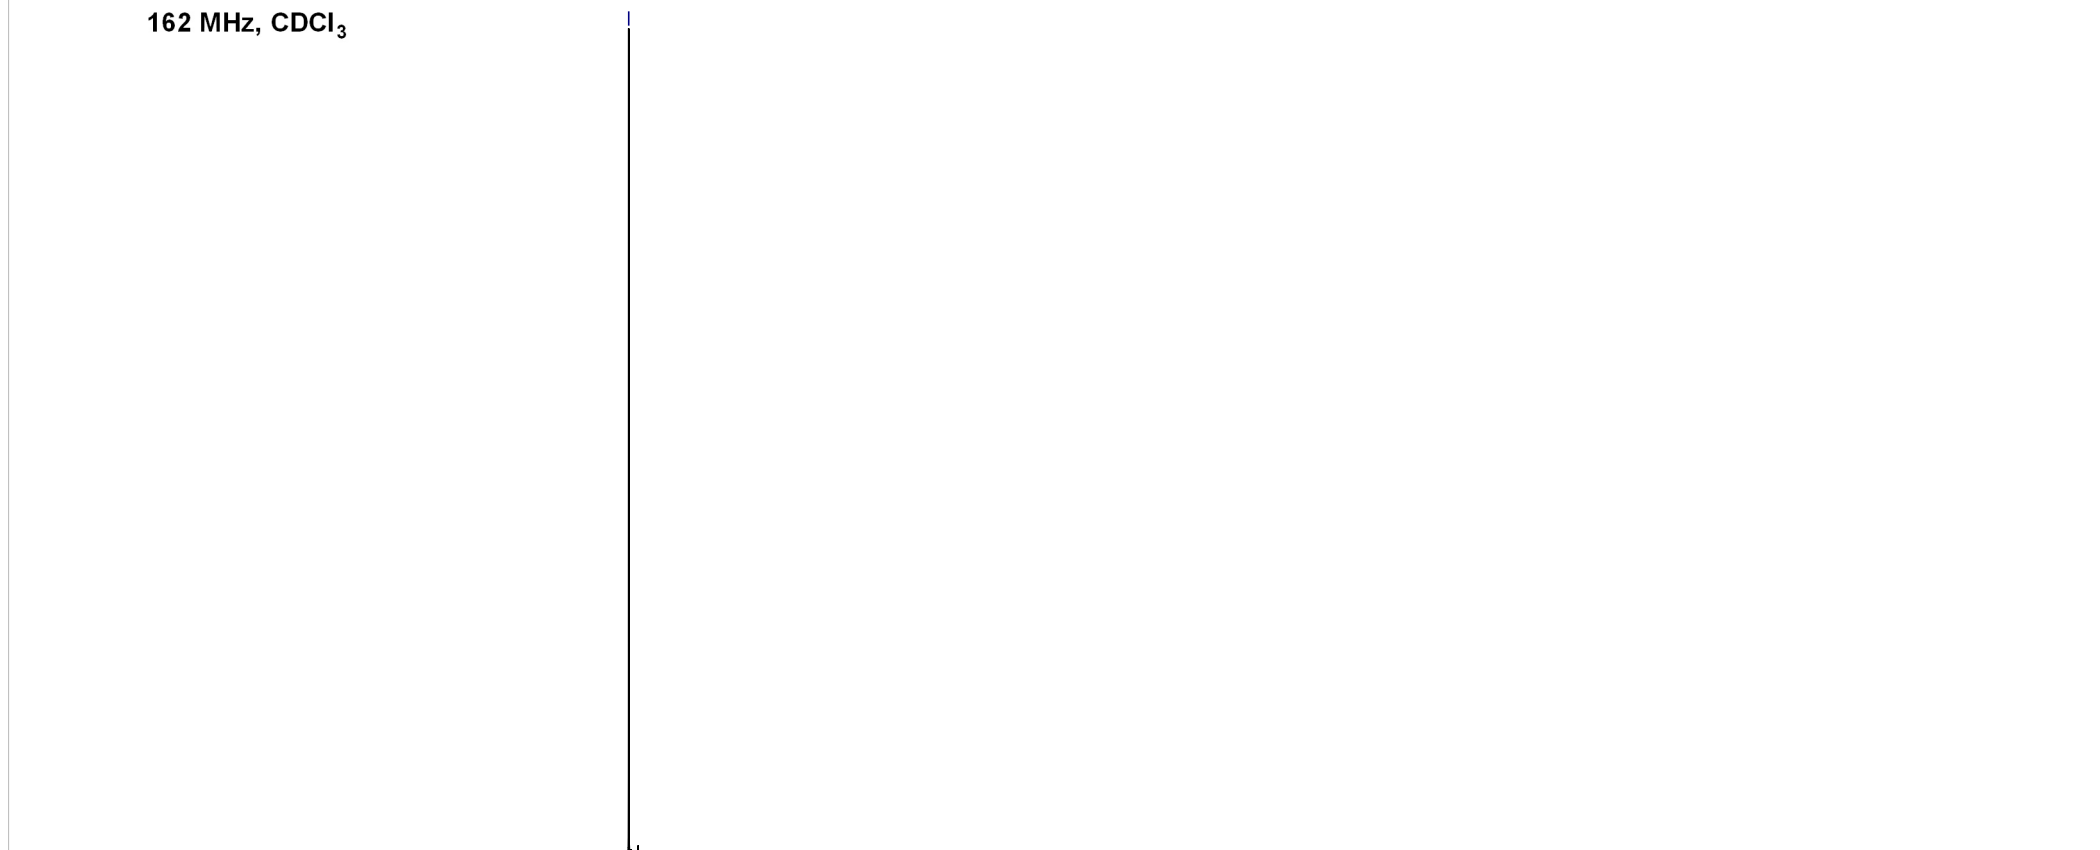

f1 (ppm)

S63

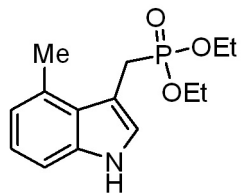

3da

<sup>1</sup>H NMR  
400 MHz, CDCl<sub>3</sub>

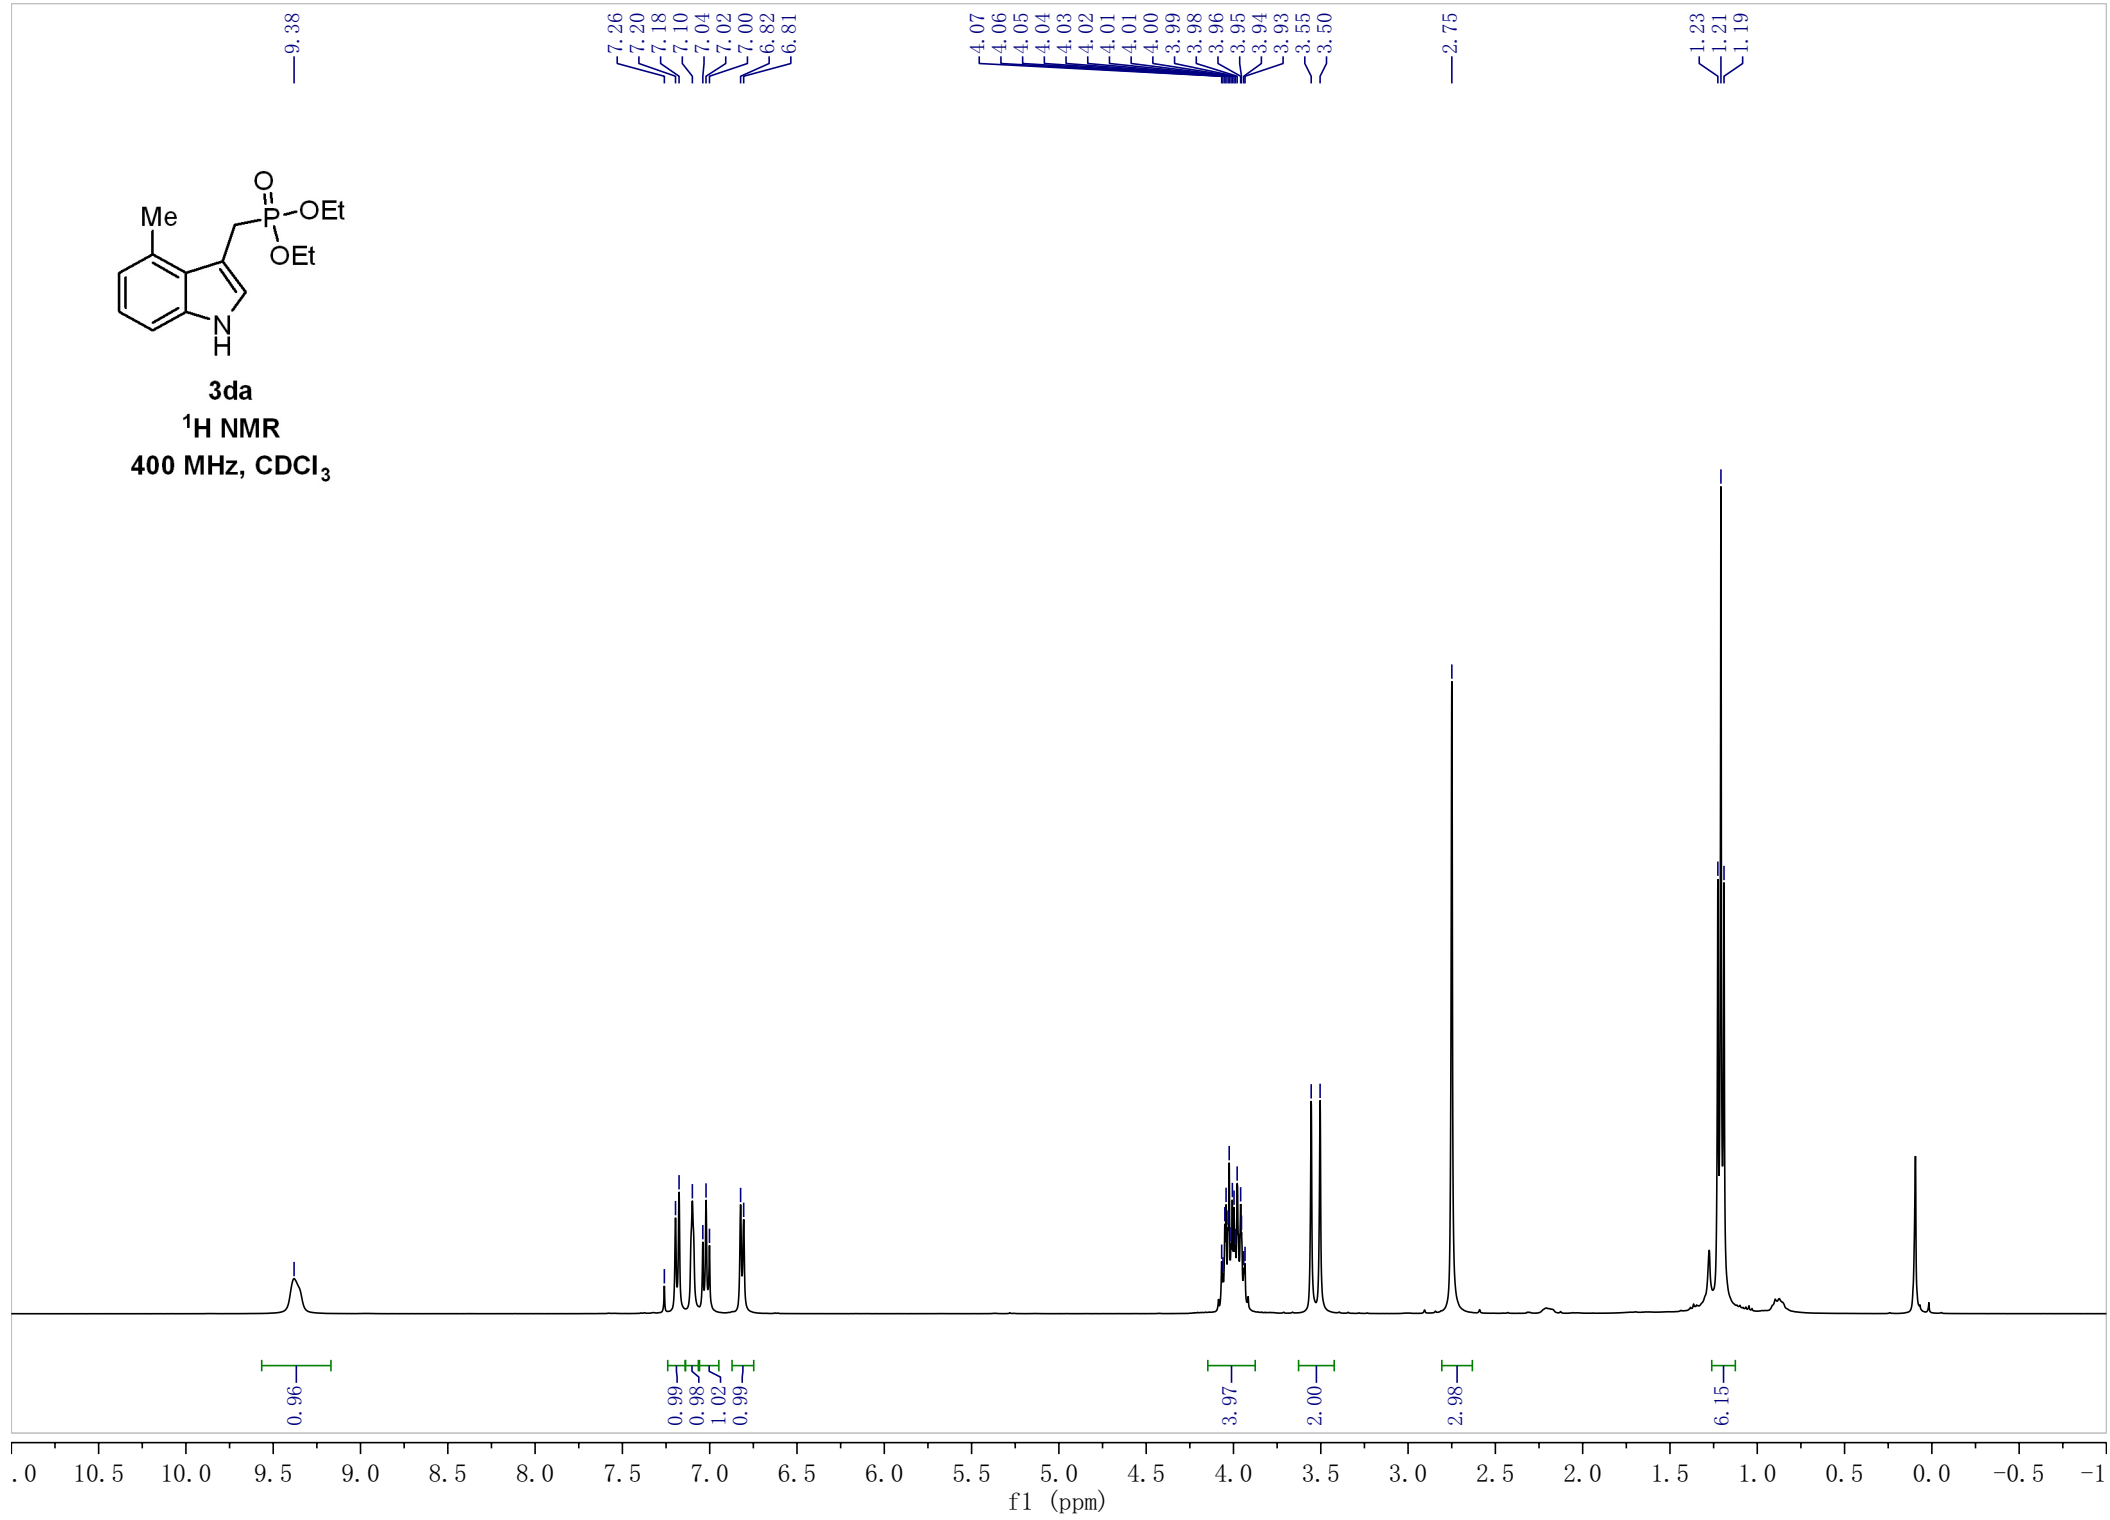

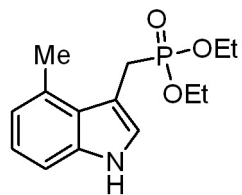

**3da**

<sup>13</sup>C NMR  
101 MHz, CDCl<sub>3</sub>

136.41  
130.21  
125.65  
124.51  
124.43  
121.67  
121.09  
109.57  
104.17  
77.32  
77.00  
76.68  
62.16  
62.09  
25.39  
23.98  
20.22  
16.30  
16.24

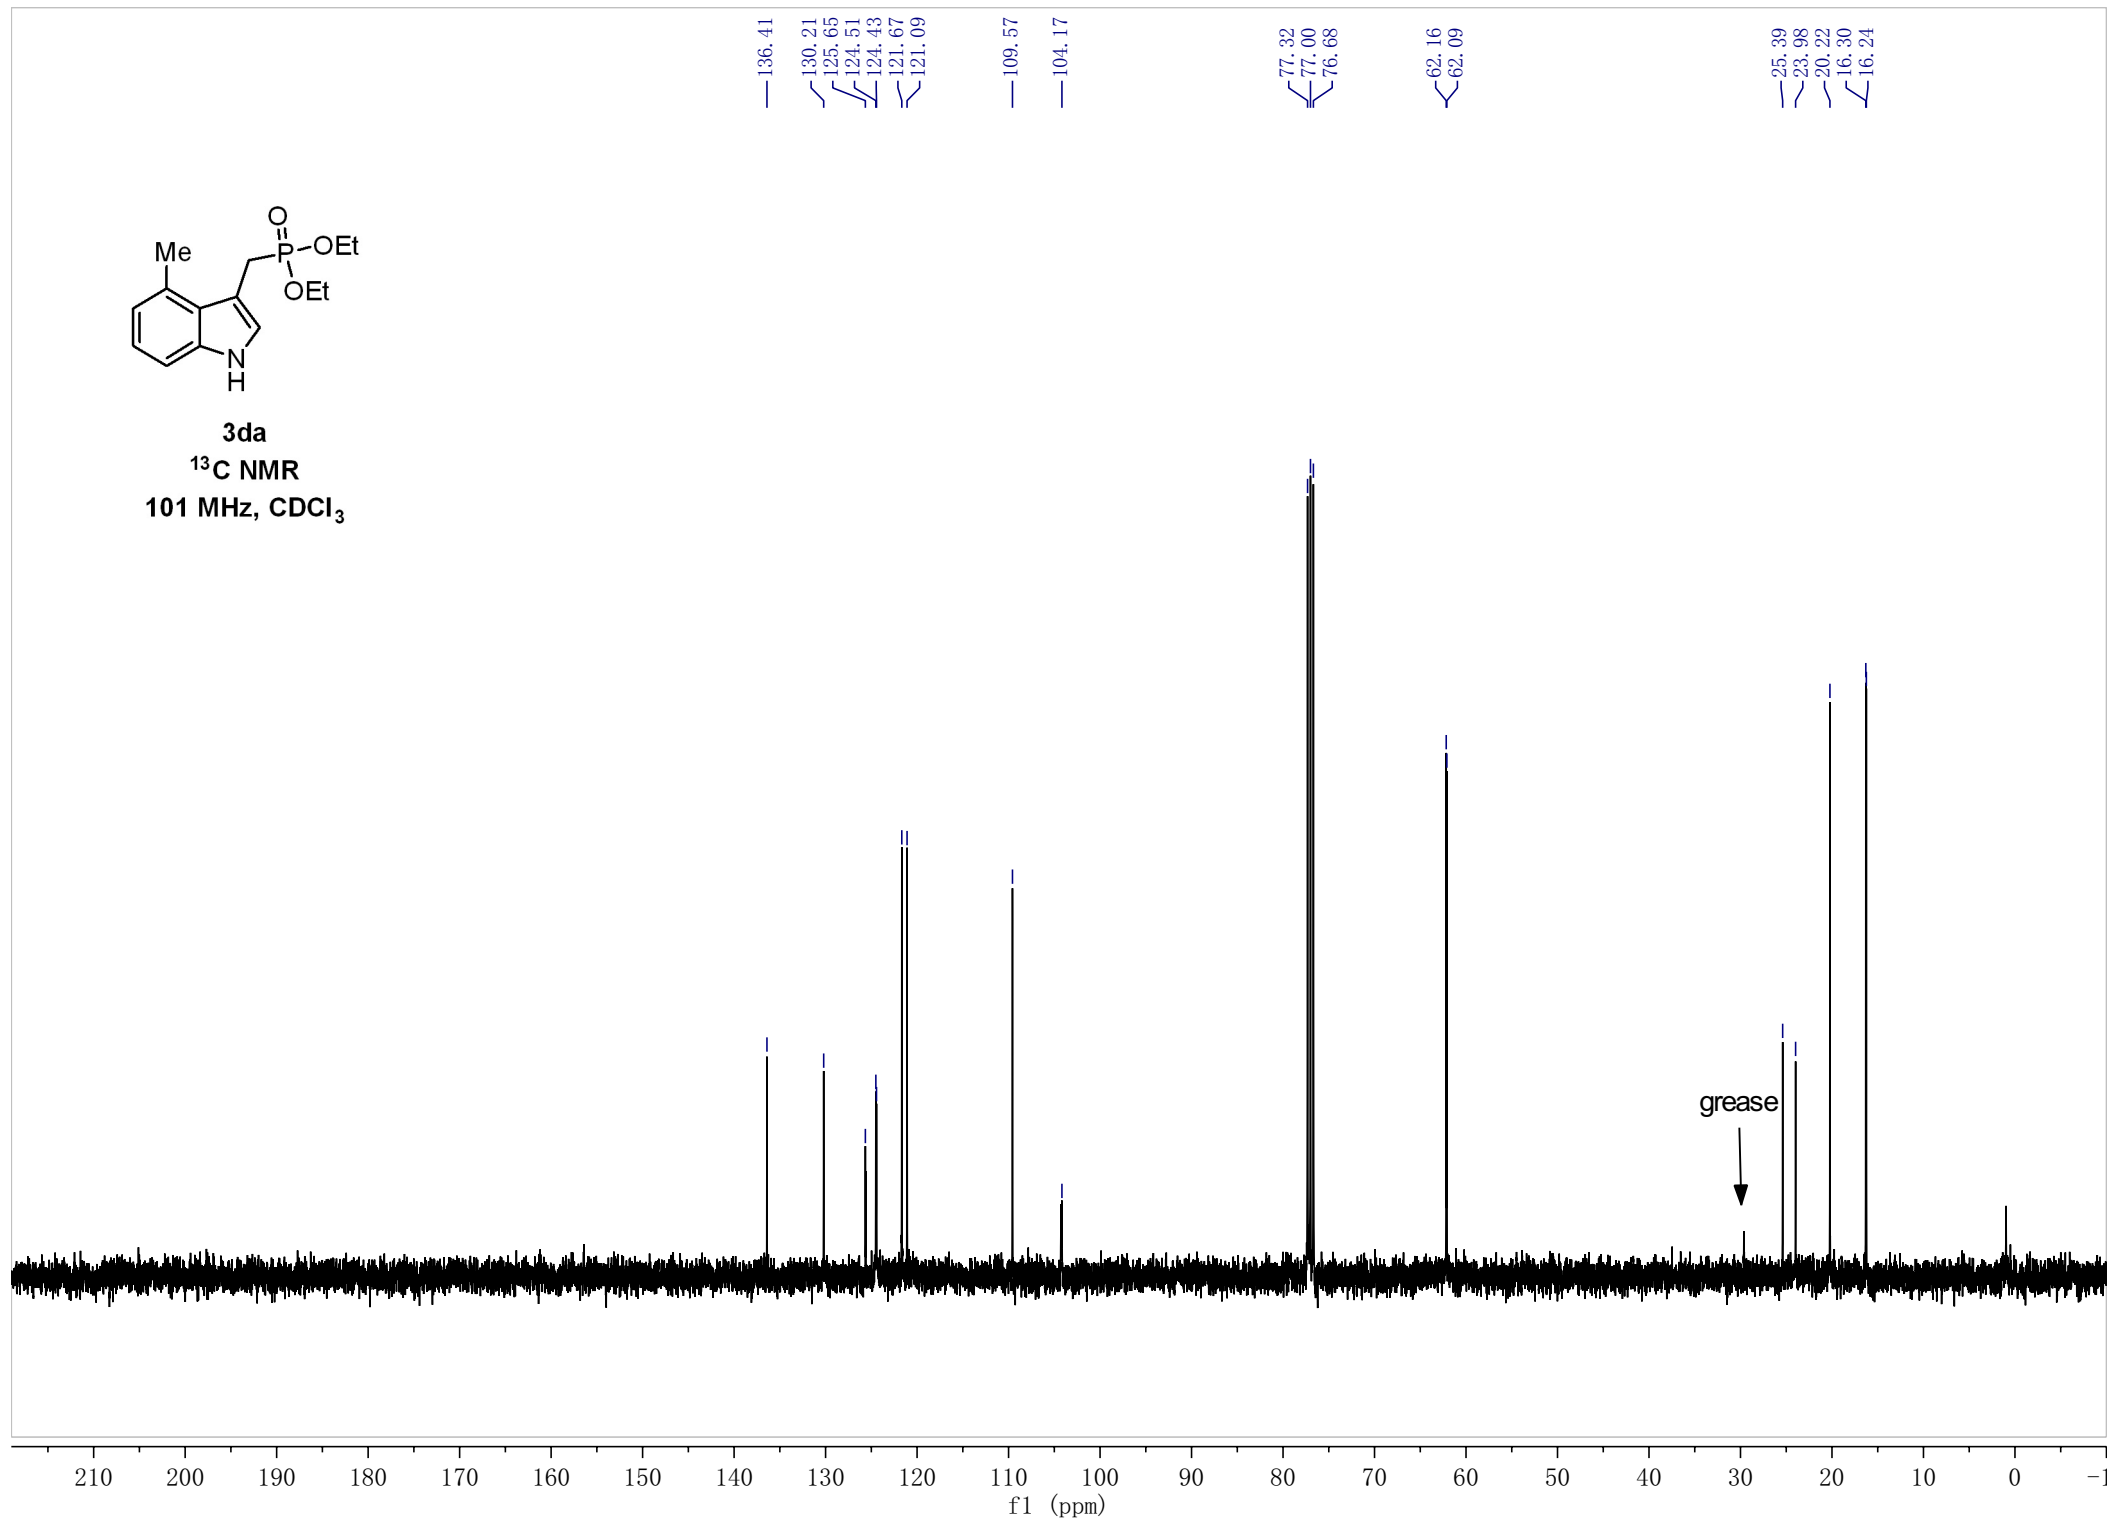

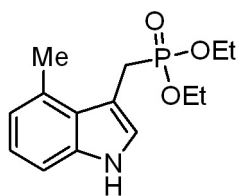

**3da**

**<sup>31</sup>P NMR**  
**162 MHz, CDCl<sub>3</sub>**

—27.88

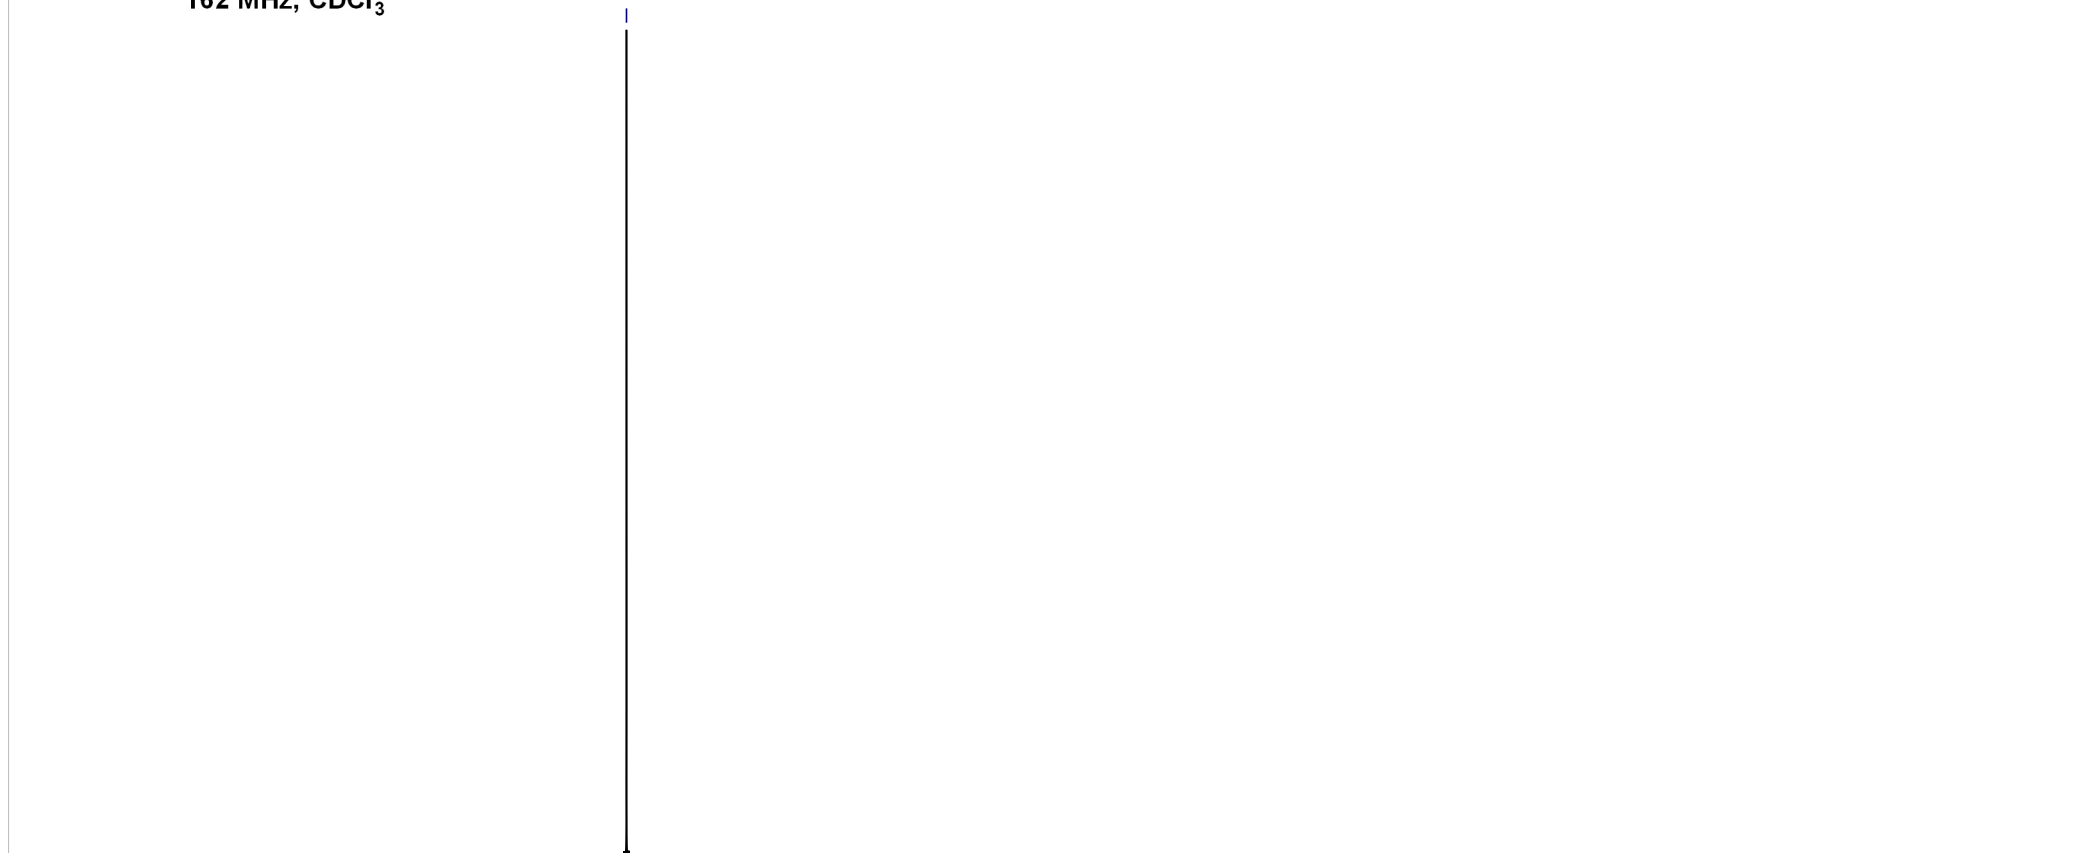

130 110 90 80 70 60 50 40 30 20 10 0 -10 -30 -50 -70 -90 -110 -130 -150 -170 -190 -210 -230

f1 (ppm)

S66

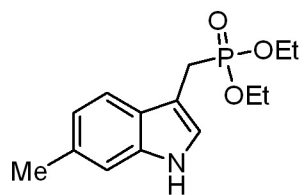

3fa

<sup>1</sup>H NMR  
400 MHz, CDCl<sub>3</sub>

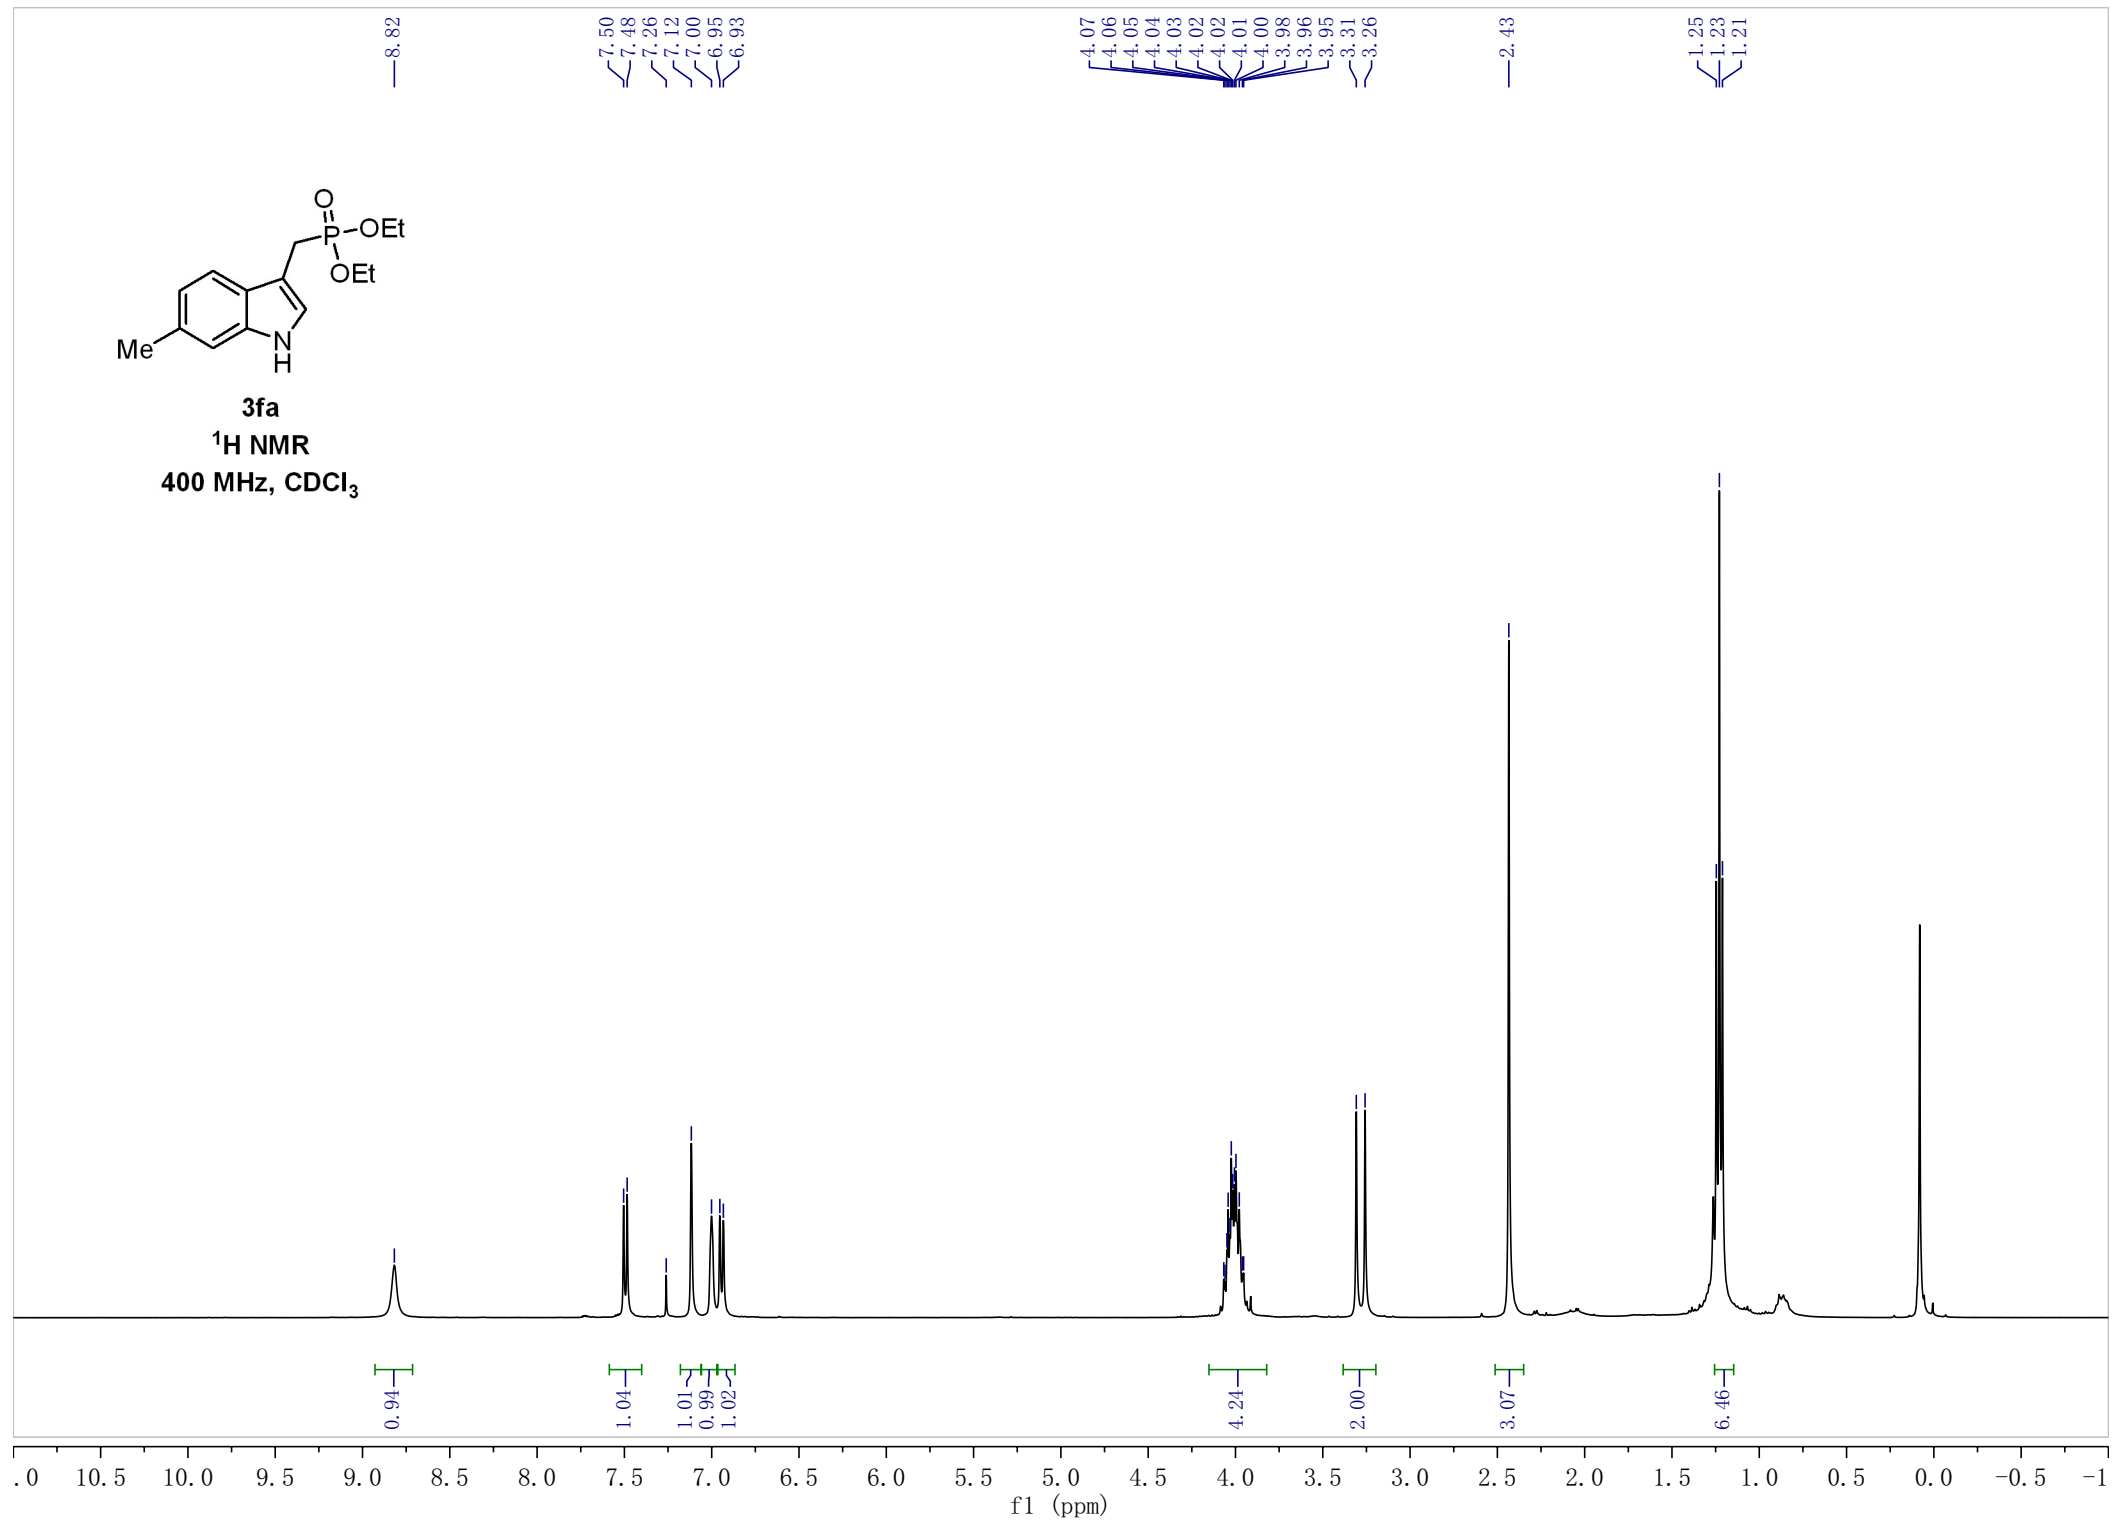

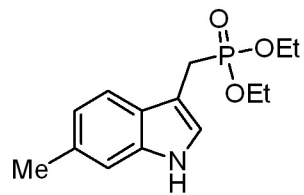

**3fa**

<sup>13</sup>C NMR  
101 MHz, CDCl<sub>3</sub>

136.50 131.53 125.31 123.27 123.19 121.07 118.33 111.23 104.07 77.32 77.00 76.68 62.07 62.01 23.77 22.35 21.61 16.39 16.33

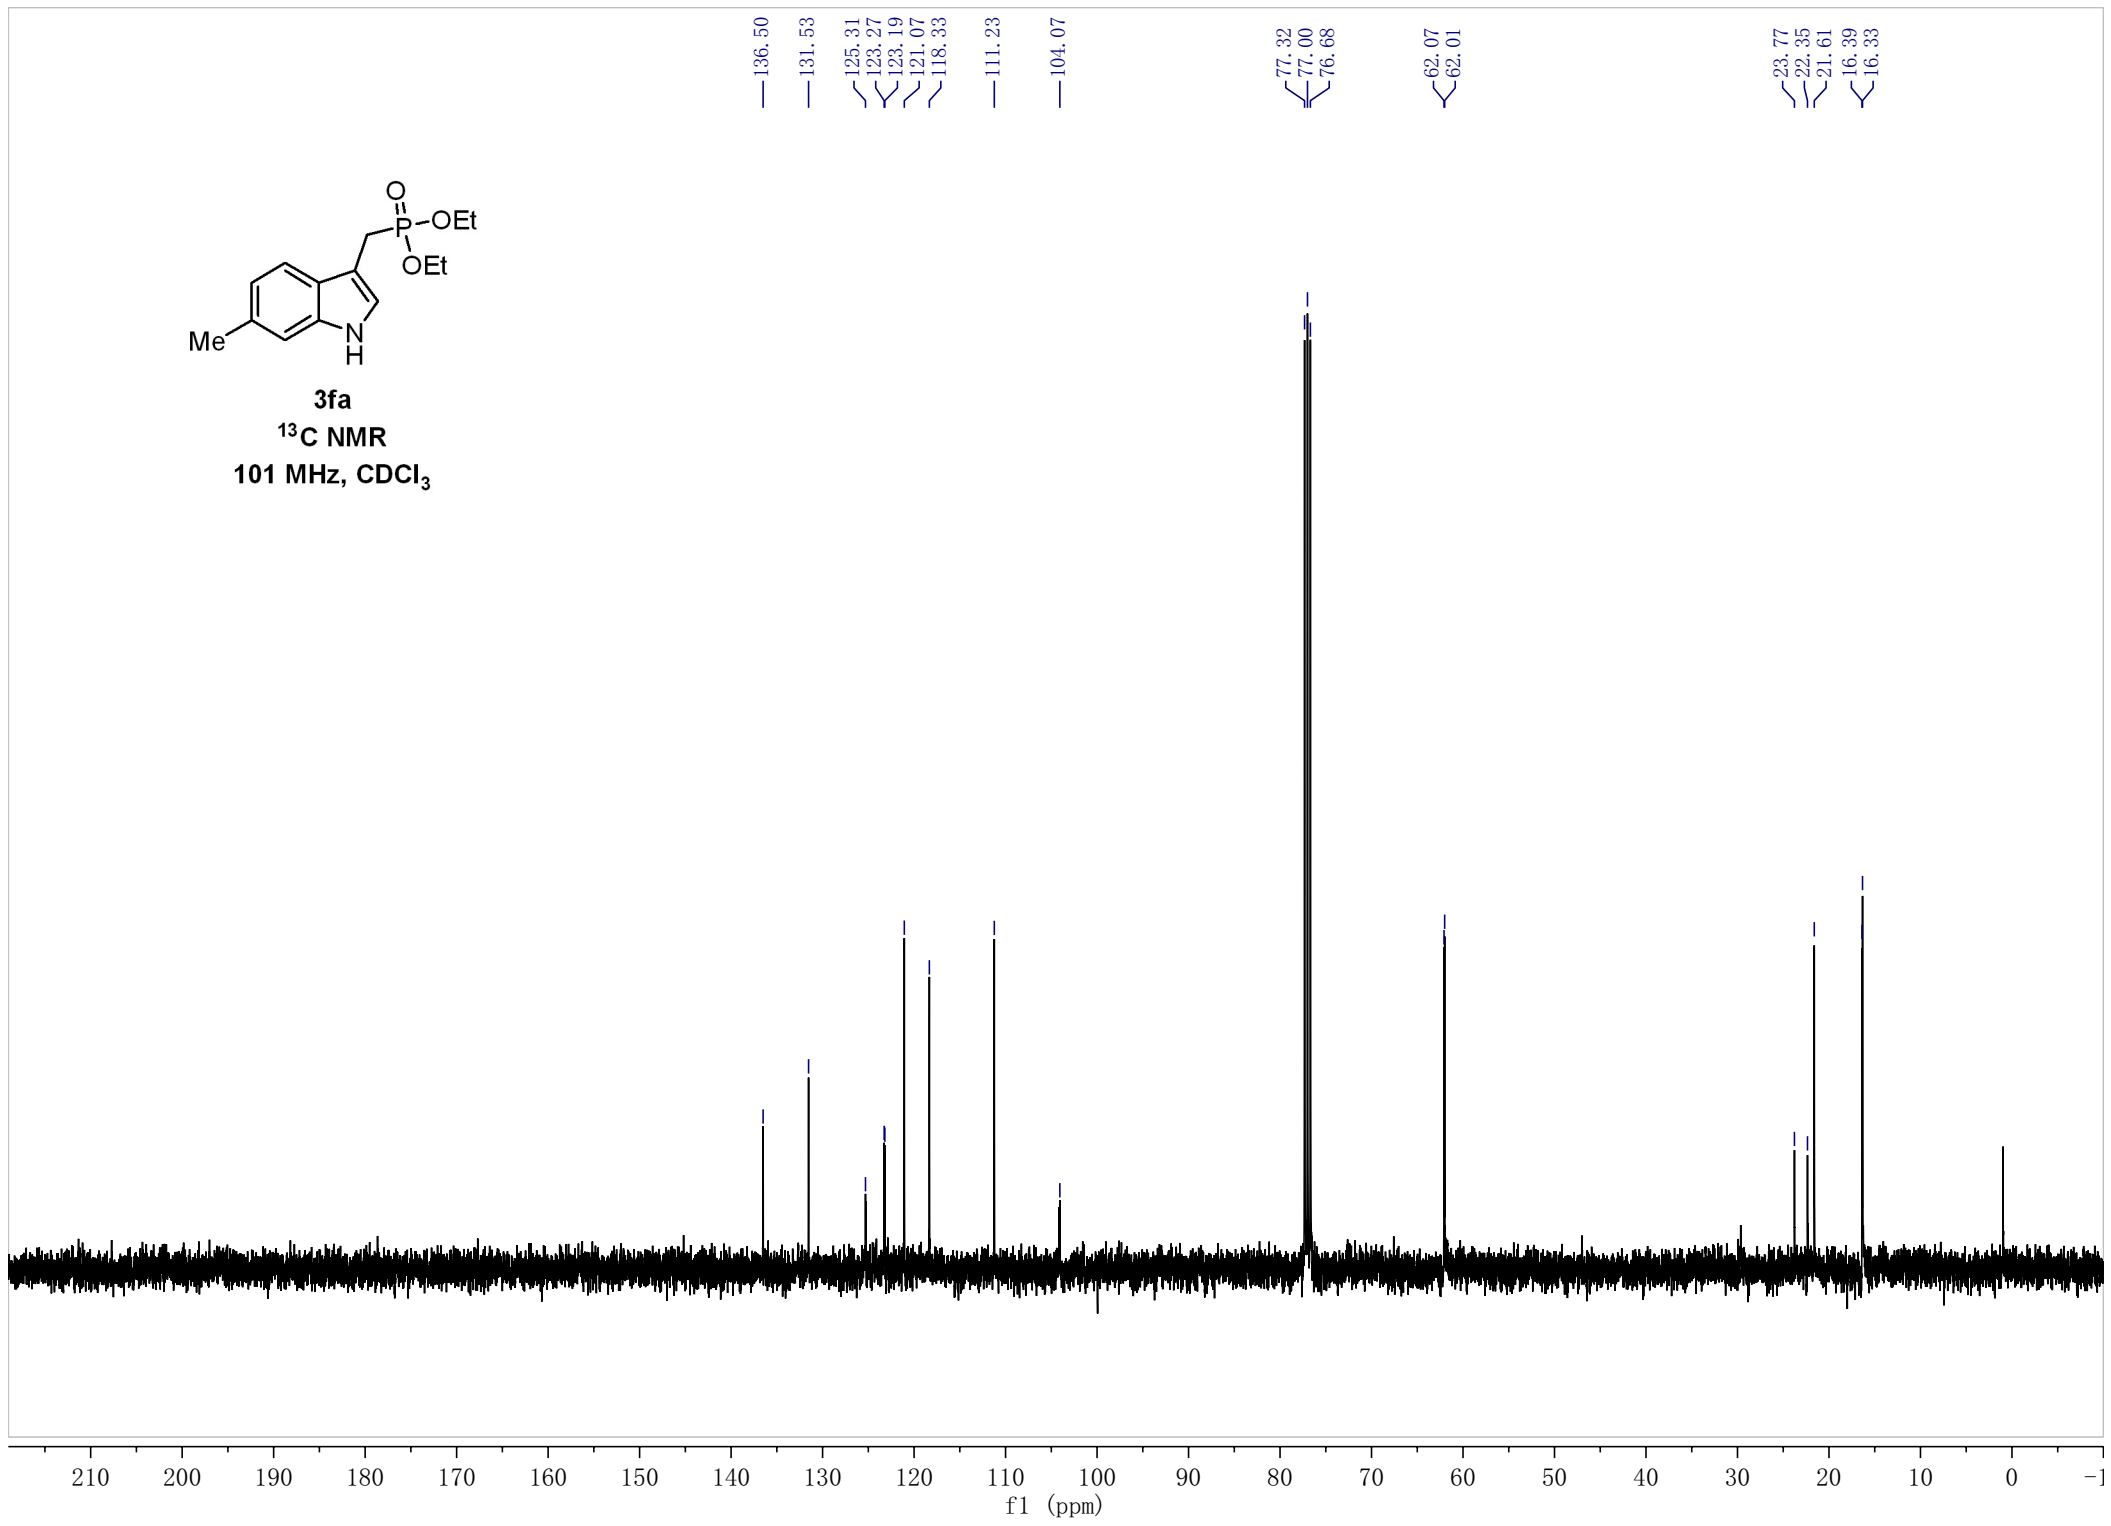



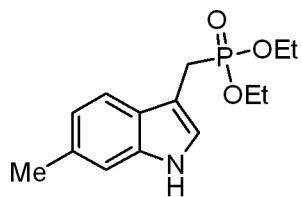

**3fa**

**<sup>31</sup>P NMR**

**162 MHz, CDCl<sub>3</sub>**

—27.93

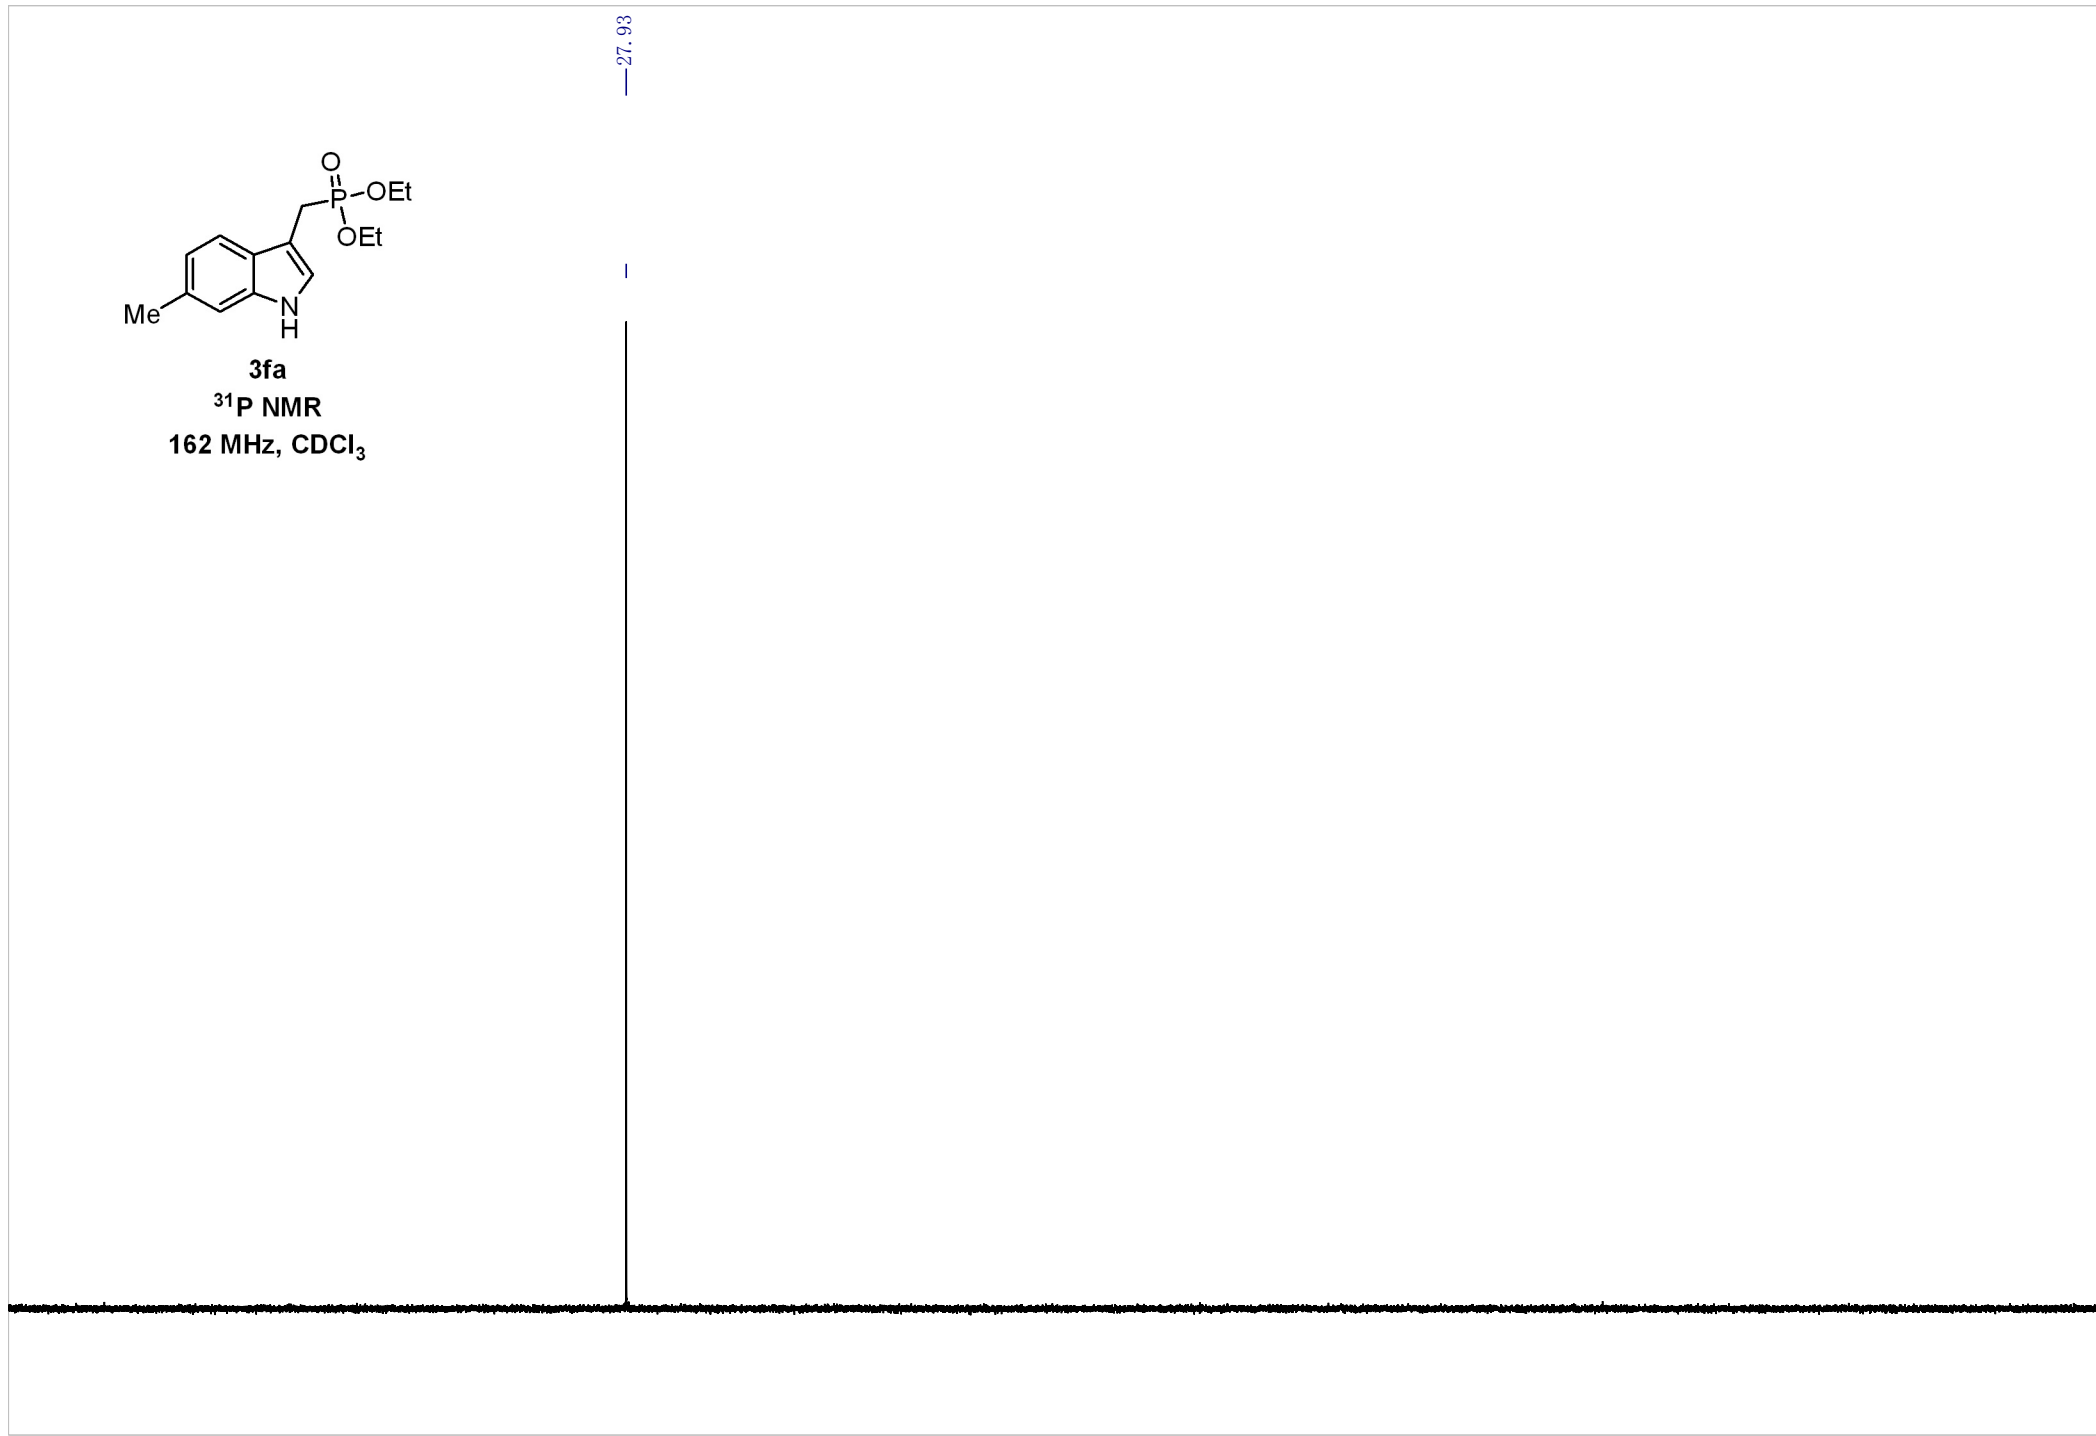

130 110 90 80 70 60 50 40 30 20 10 0 -10 -30 -50 -70 -90 -110 -130 -150 -170 -190 -210 -230

f1 (ppm)

S69

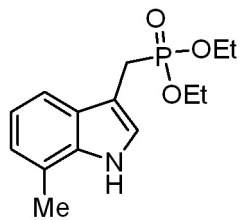

**3ga**

**<sup>1</sup>H NMR**  
**400 MHz, CDCl<sub>3</sub>**

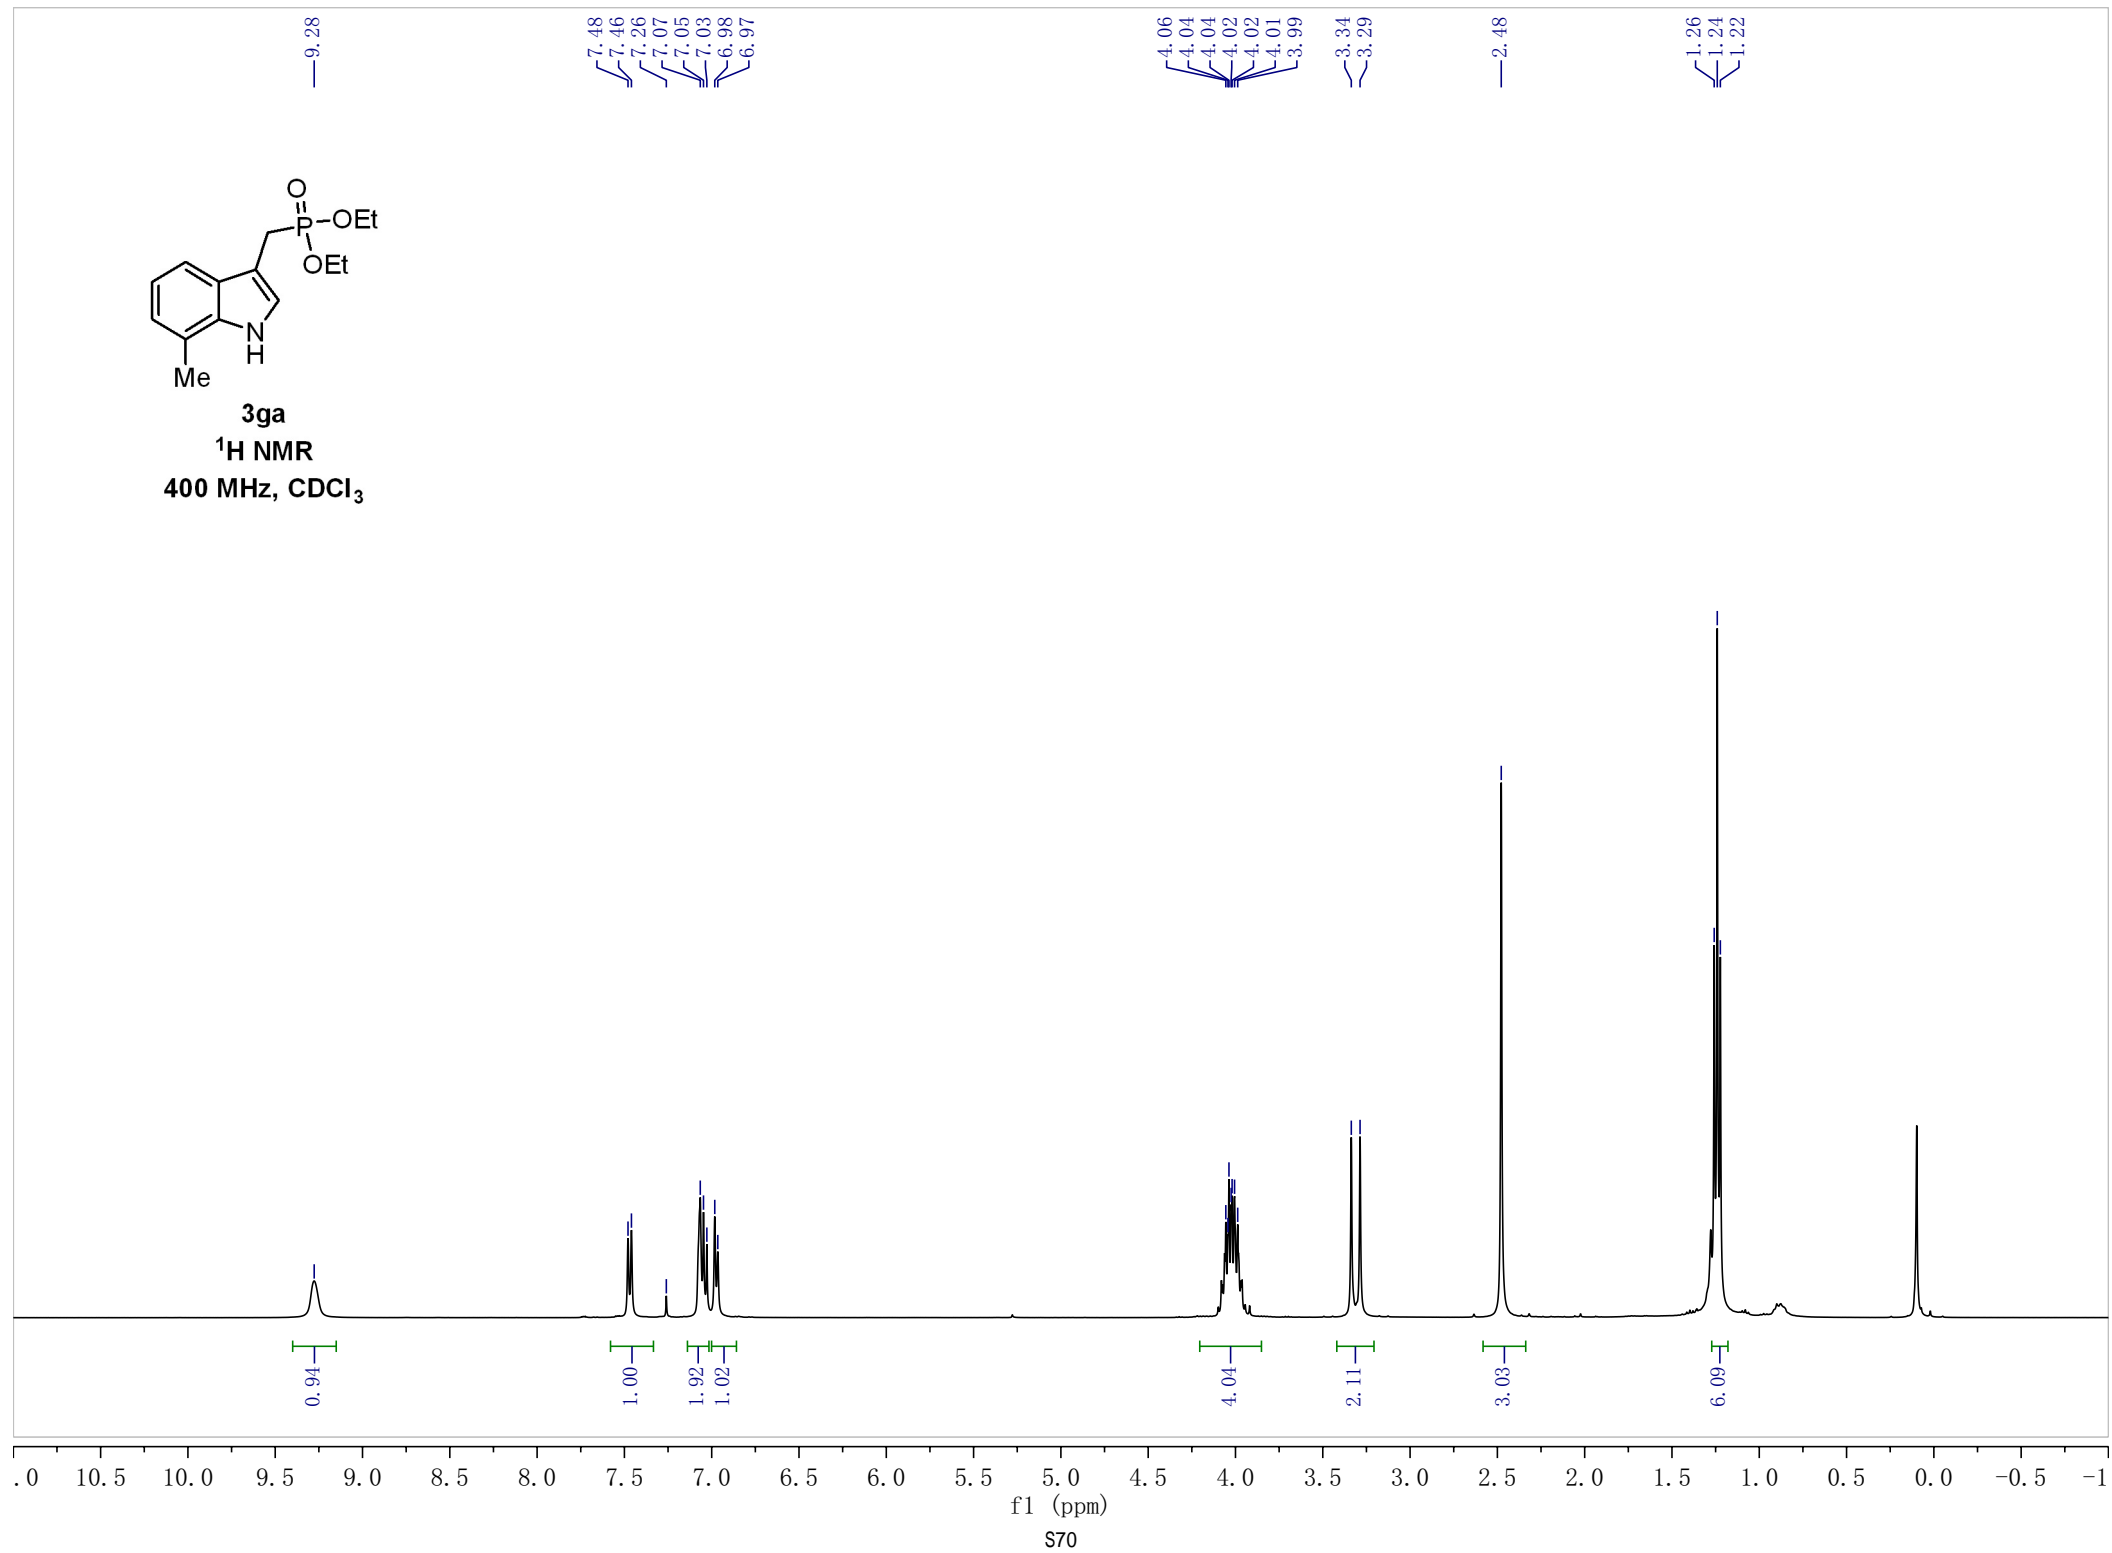

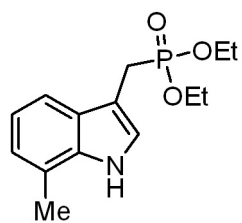

**3ga**

<sup>13</sup>C NMR

101 MHz, CDCl<sub>3</sub>

135.65  
126.97  
126.91  
123.95  
123.87  
122.20  
119.35  
116.21  
104.41  
104.32  
77.32  
77.00  
76.68  
62.05  
61.99  
23.75  
22.32  
16.50  
16.36  
16.30

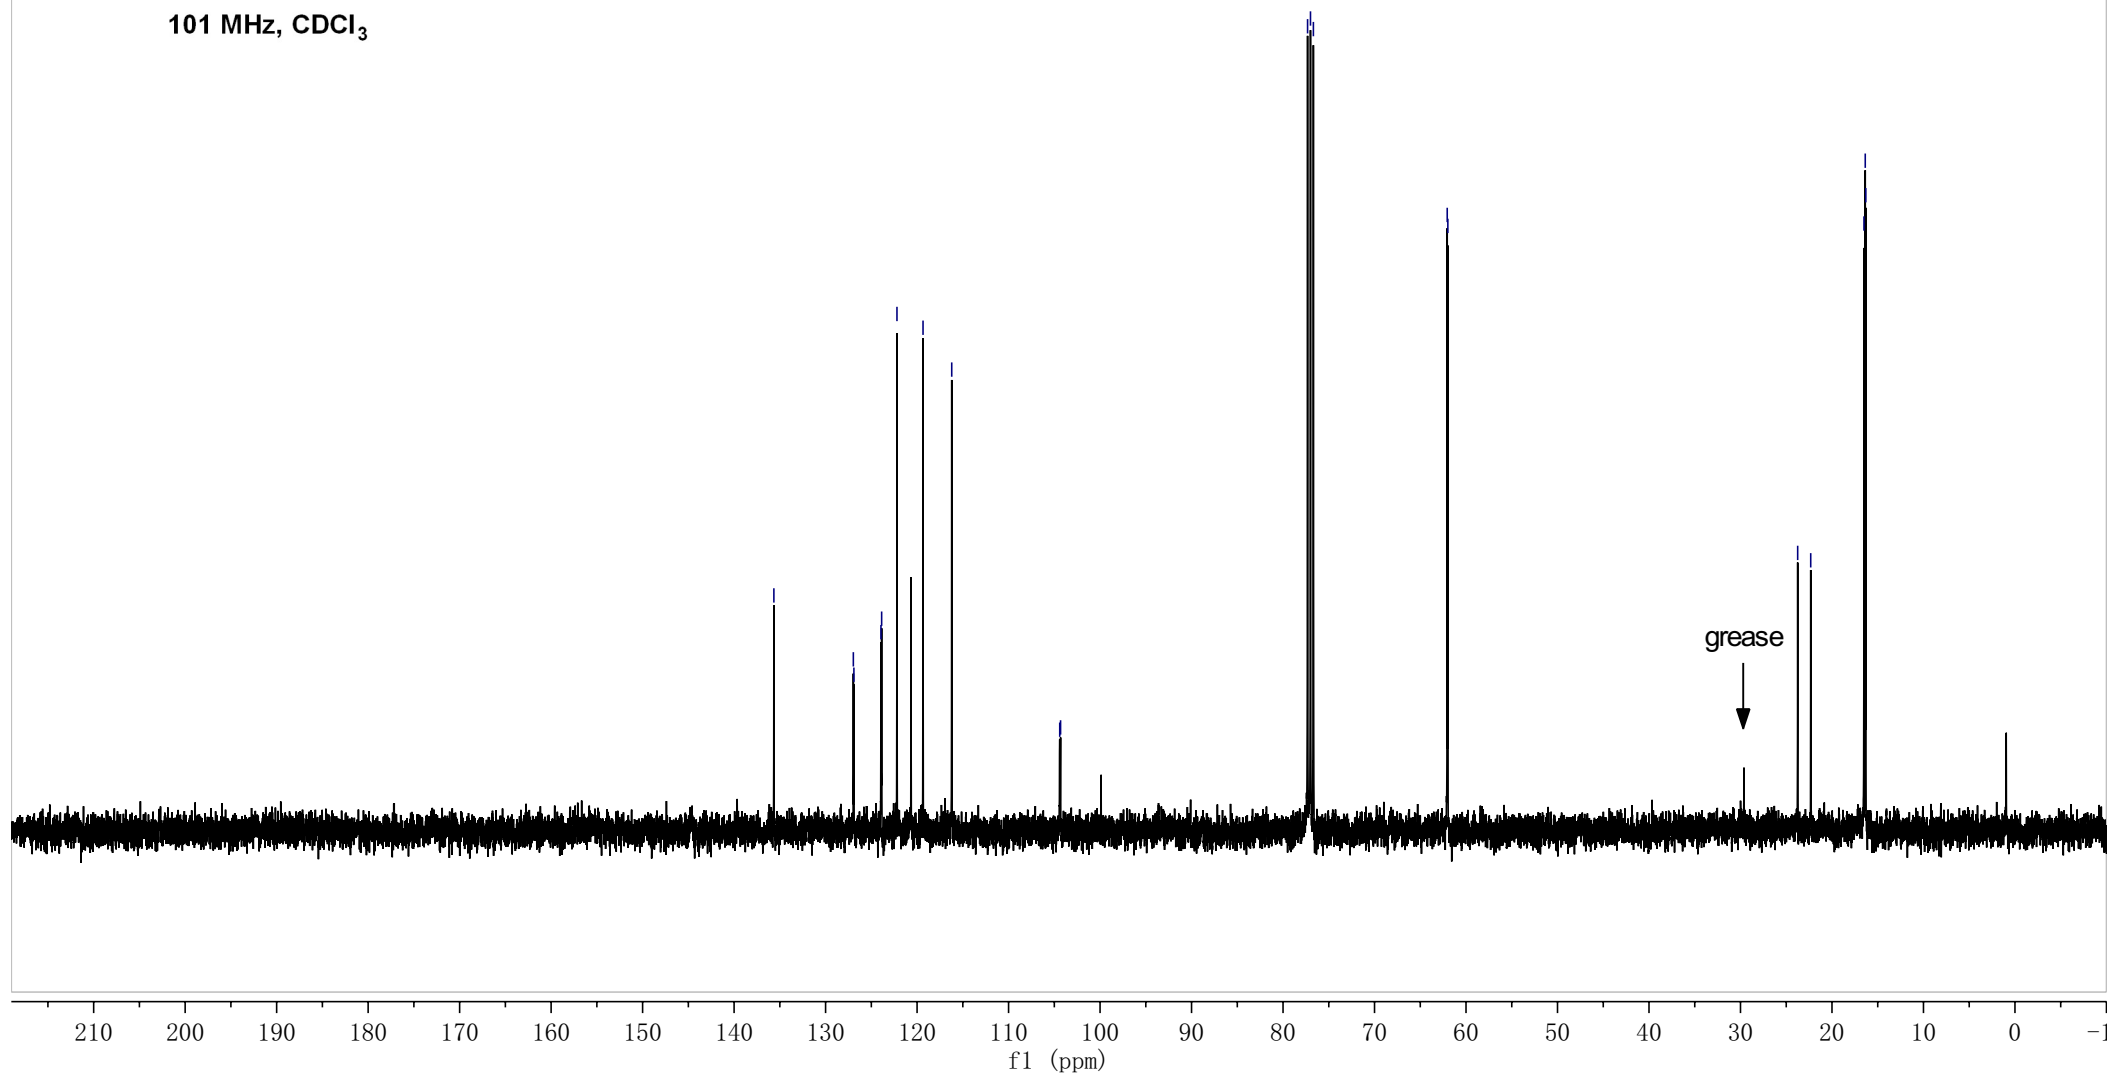

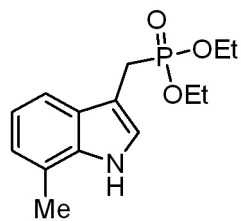

**3ga**

**<sup>31</sup>P NMR**

**162 MHz, CDCl<sub>3</sub>**

—28.01

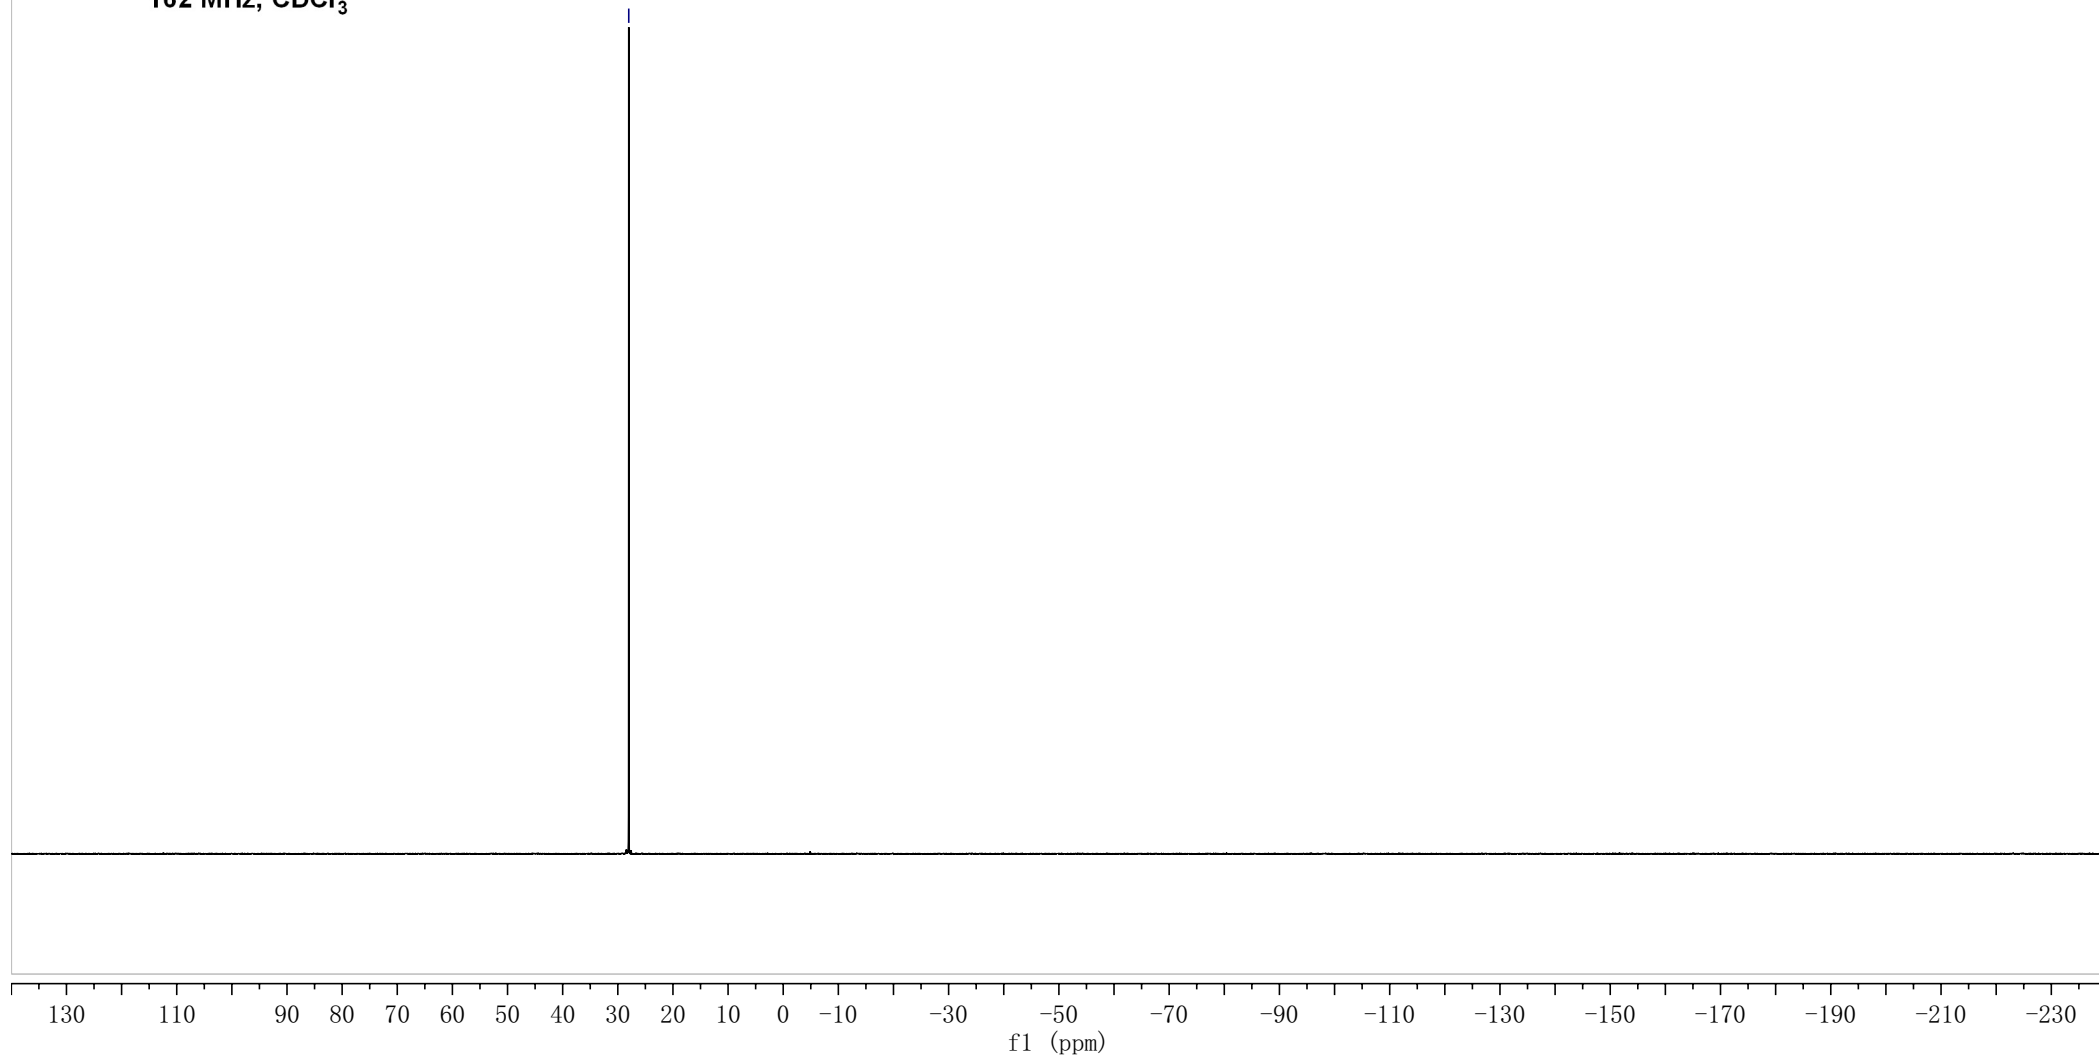

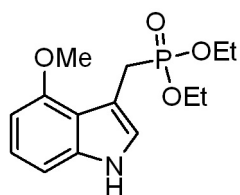

**3ha**

**<sup>1</sup>H NMR**  
**400 MHz, CDCl<sub>3</sub>**

8.96

7.26

7.07

7.06

7.04

7.02

6.96

6.94

6.47

6.45

4.08

4.07

4.06

4.06

4.04

4.02

4.00

4.00

3.98

3.98

3.90

3.68

3.63

1.23

1.21

1.19

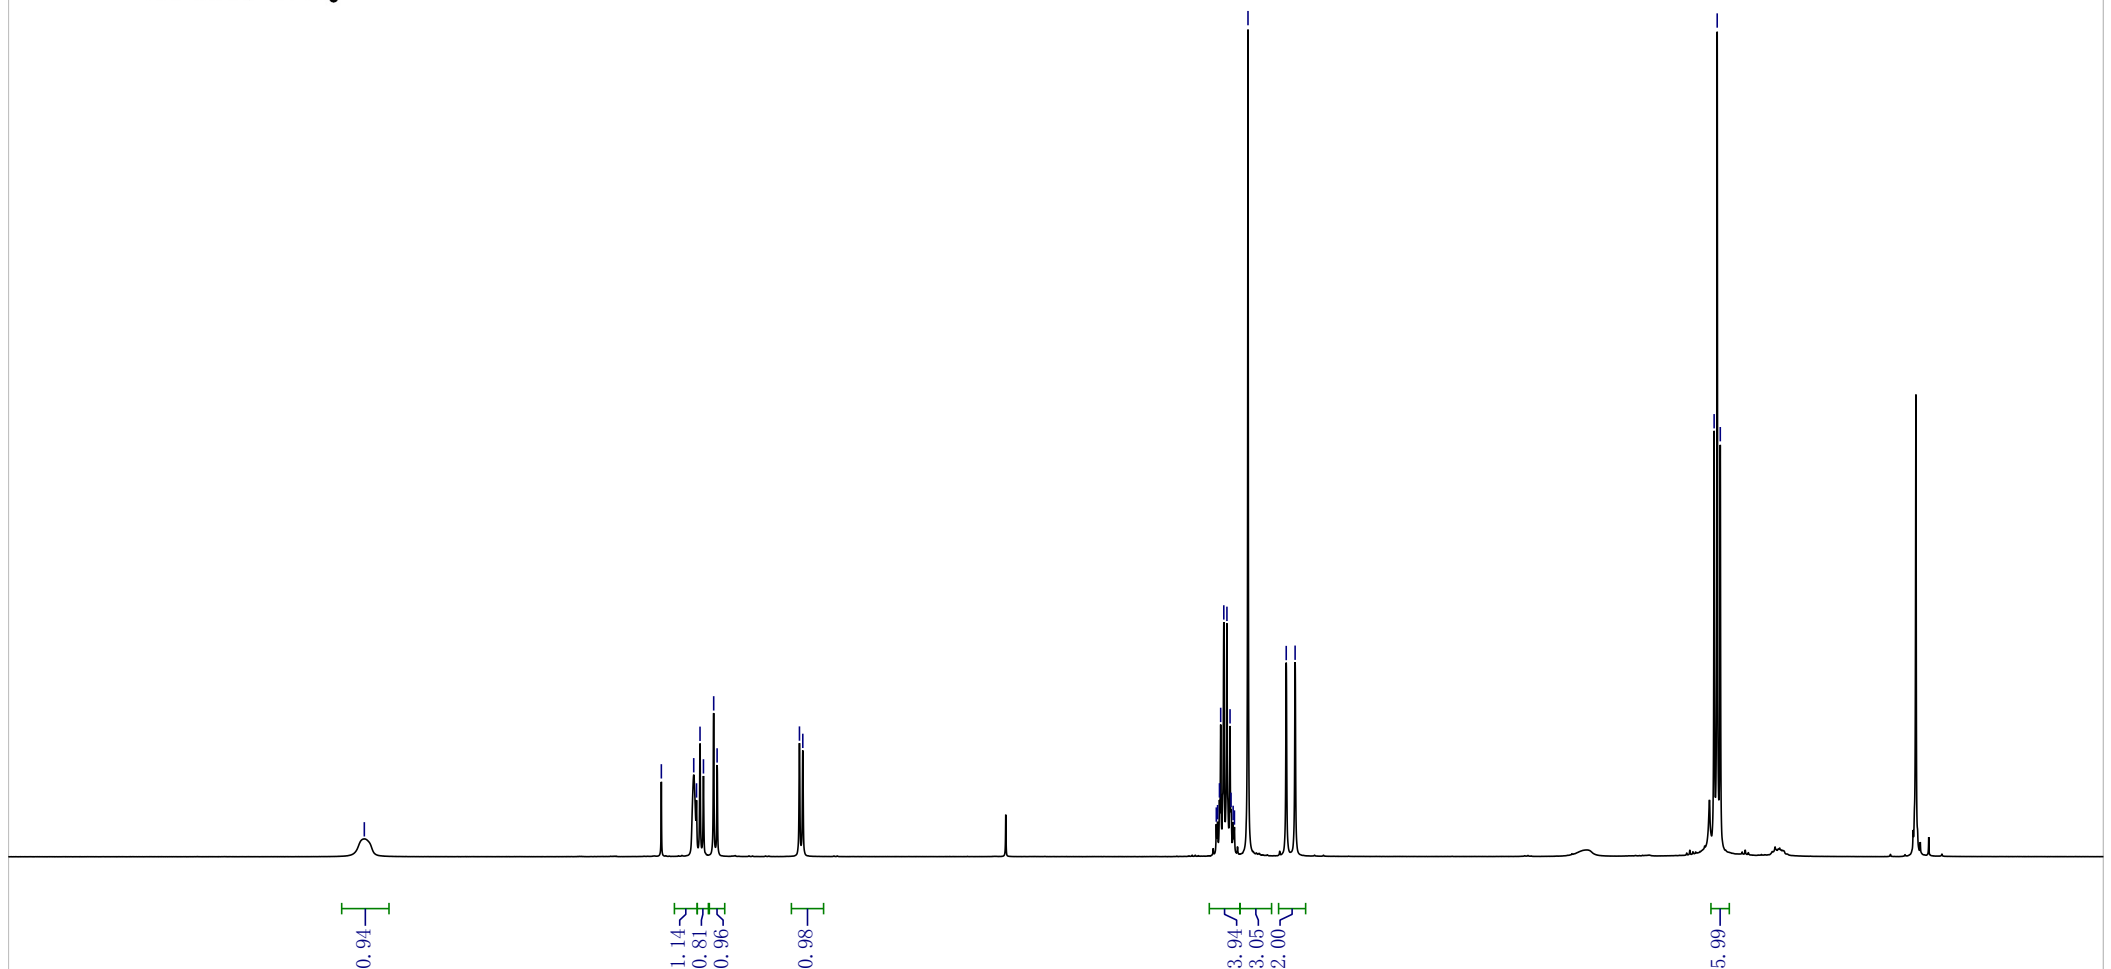

0.94

1.14

0.81

0.96

0.98

3.94

3.05

2.00

5.99

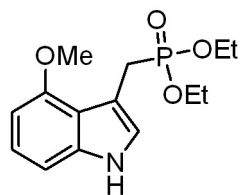

**3ha**

<sup>13</sup>C NMR  
101 MHz, CDCl<sub>3</sub>

154.58

137.52

122.78

122.71

122.37

117.26

117.19

104.89

104.19

99.26

77.32

77.00

76.68

61.89

61.82

54.95

24.24

22.85

16.32

16.26

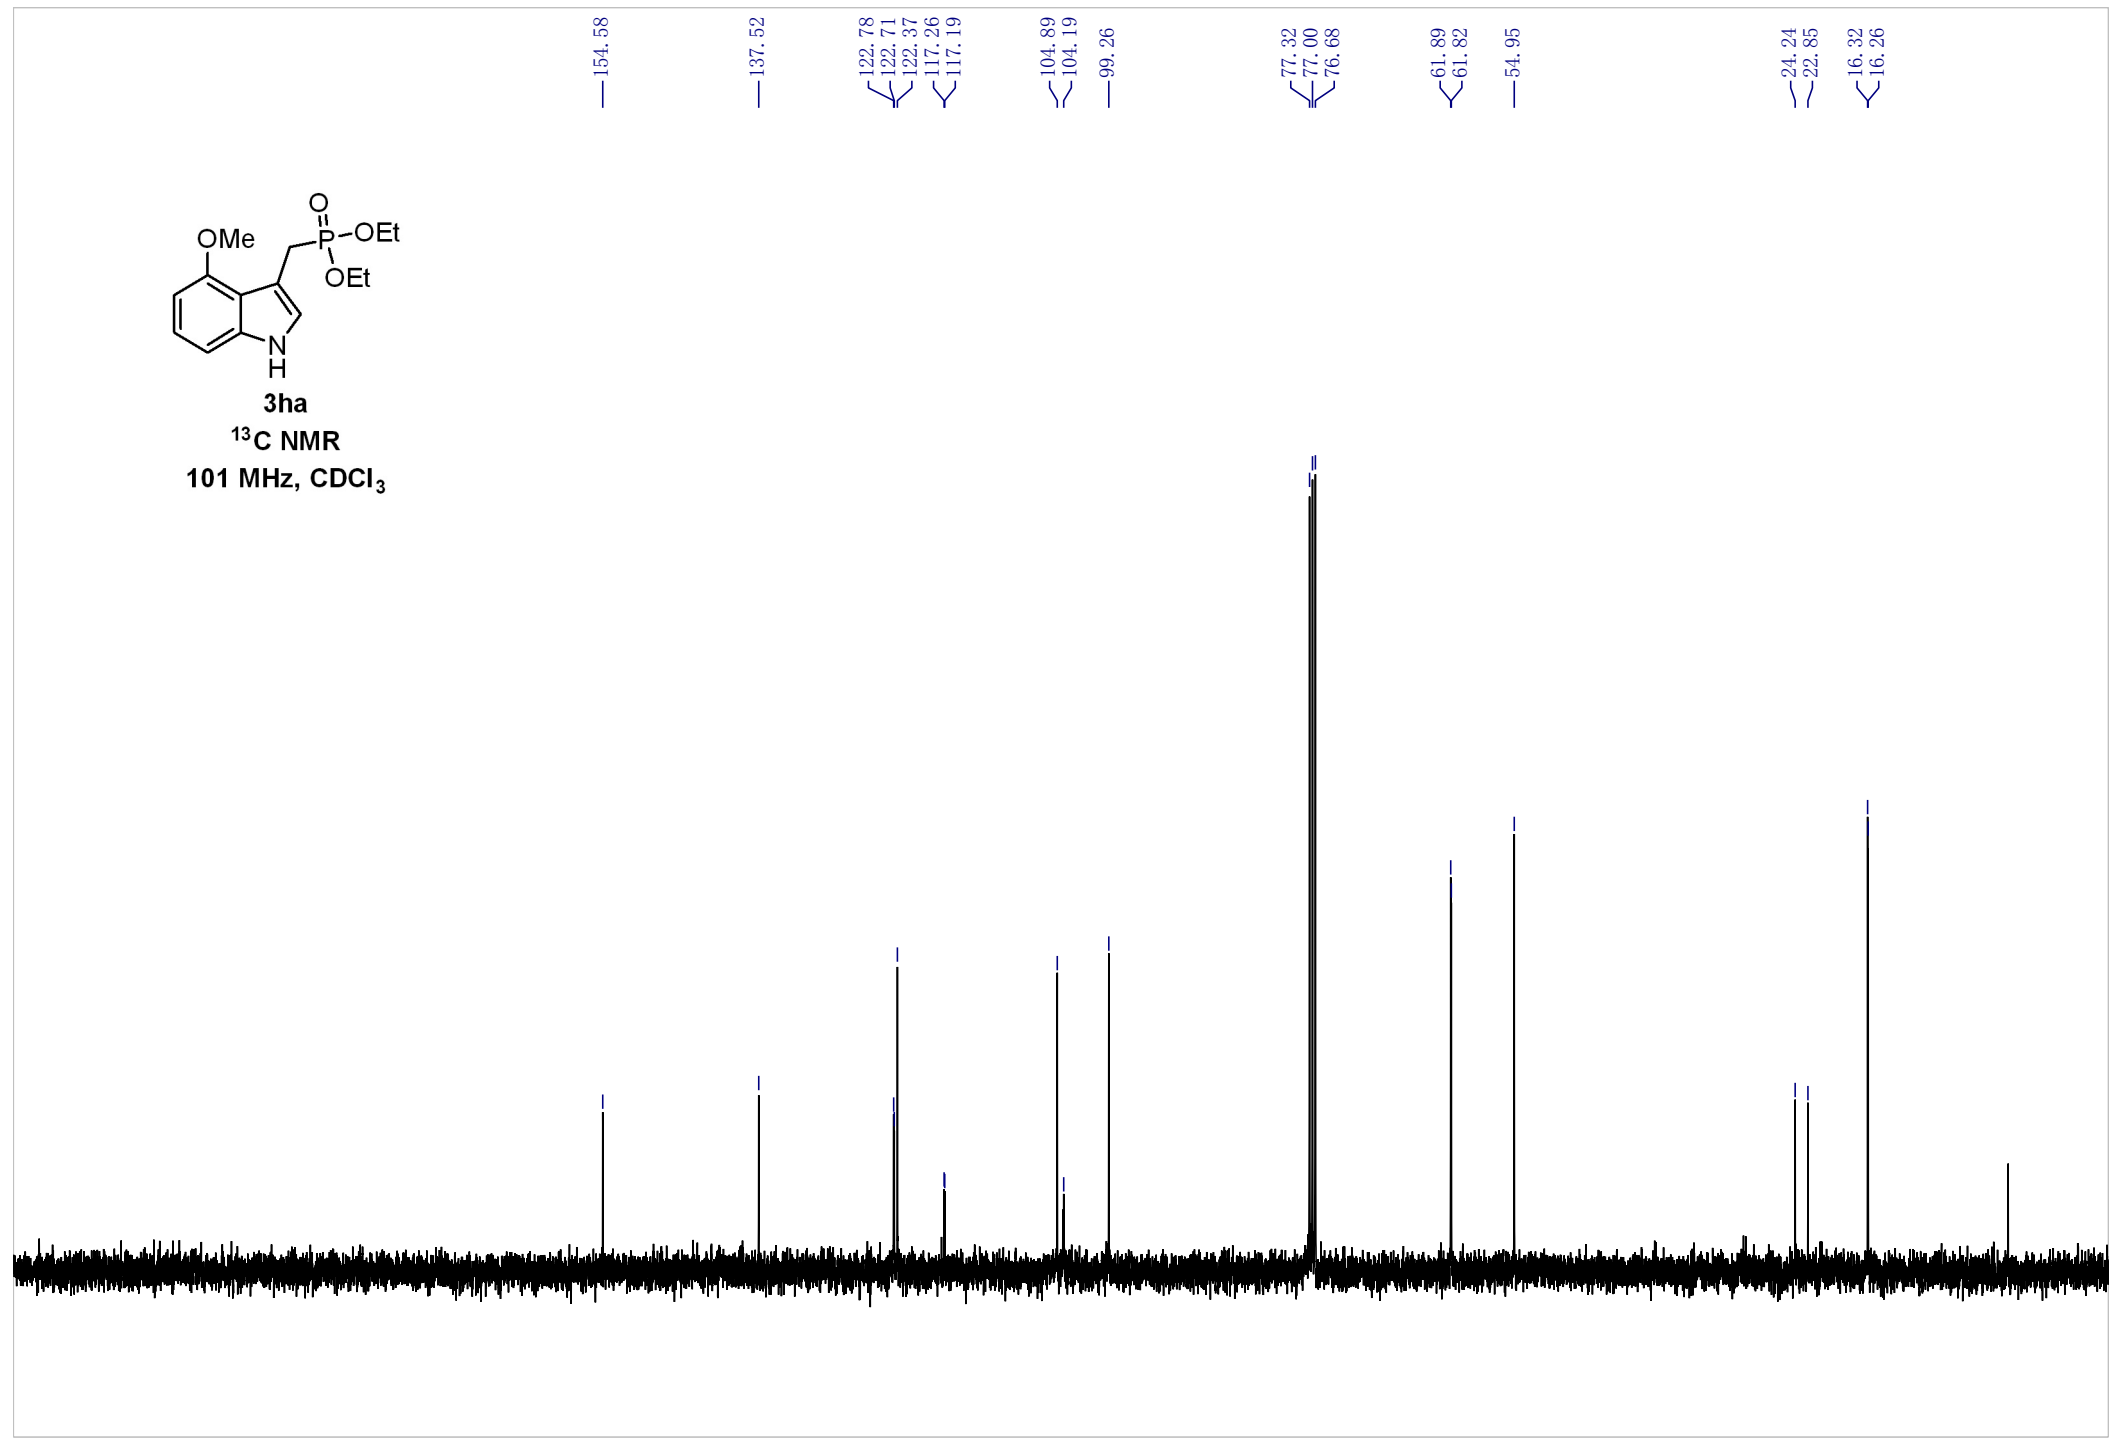

f1 (ppm)

S74

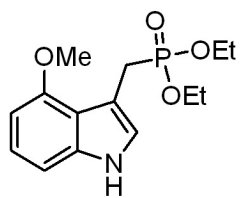

**3ha**

**<sup>31</sup>P NMR**  
**162 MHz, CDCl<sub>3</sub>**

28.99

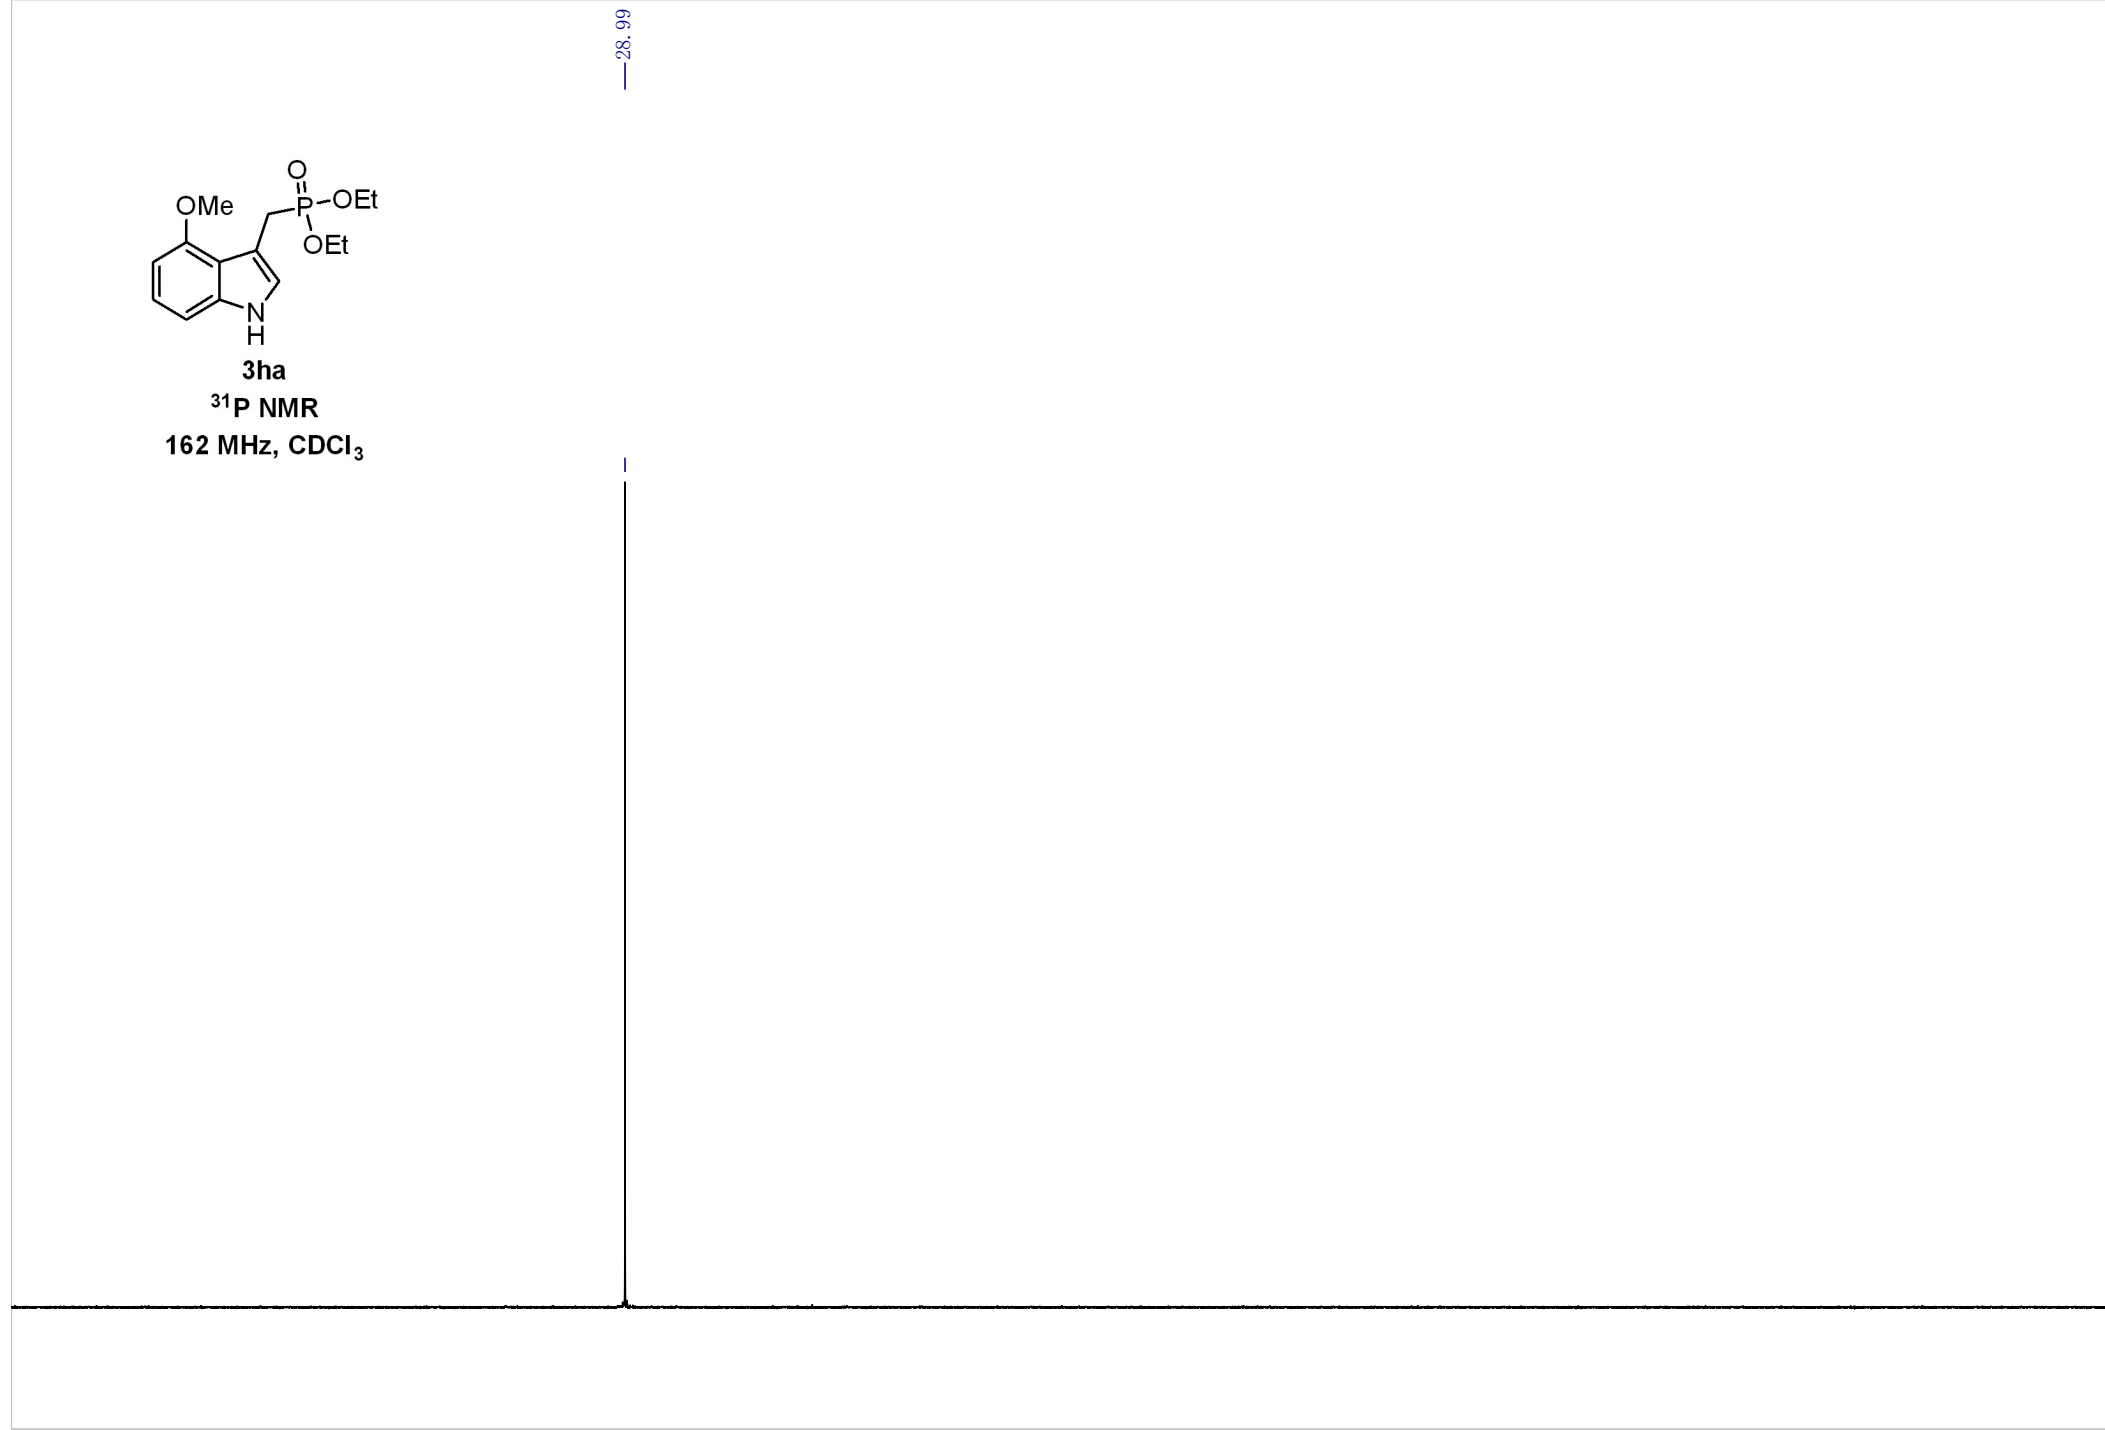

130 110 90 80 70 60 50 40 30 20 10 0 -20 -40 -60 -80 -100 -120 -140 -160 -180 -200 -220

f1 (ppm)

S75

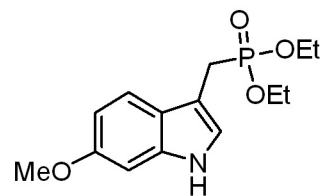

**3ia**

**<sup>1</sup>H NMR**  
**400 MHz, CDCl<sub>3</sub>**

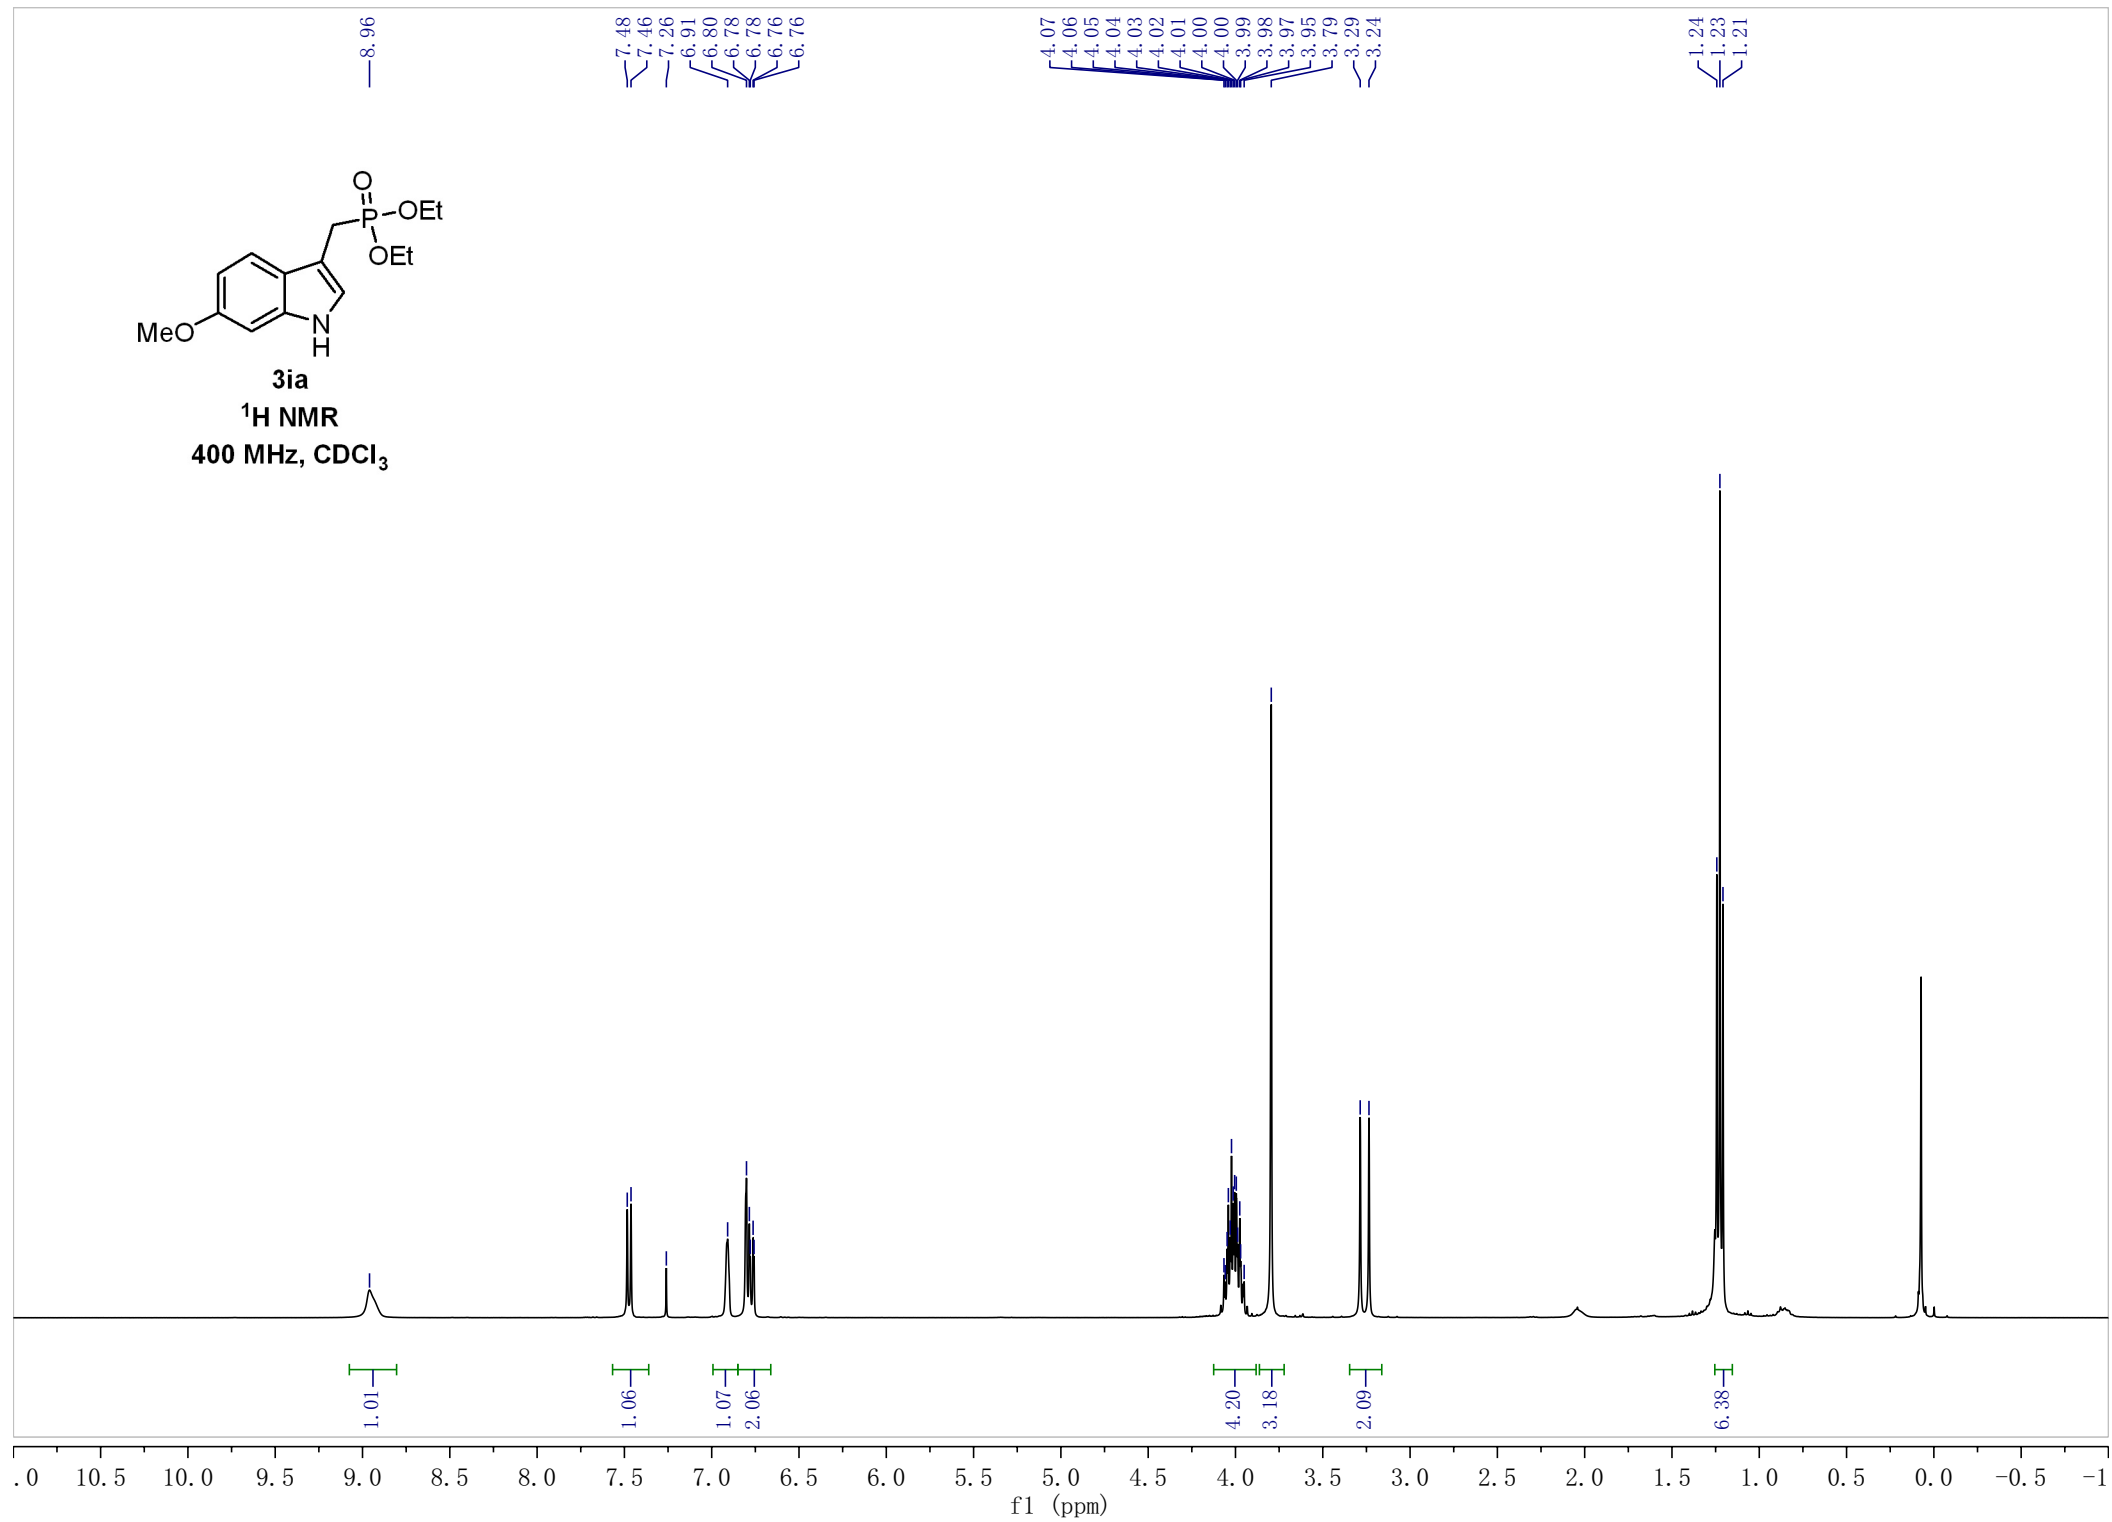



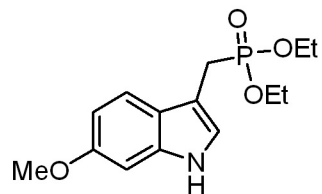

**3ia**

**<sup>13</sup>C NMR**  
**101 MHz, CDCl<sub>3</sub>**

156.29

136.81

122.76

122.68

121.82

121.77

119.32

109.44

104.04

94.56

77.32

77.00

76.68

62.10

62.03

55.50

23.83

22.40

16.38

16.32

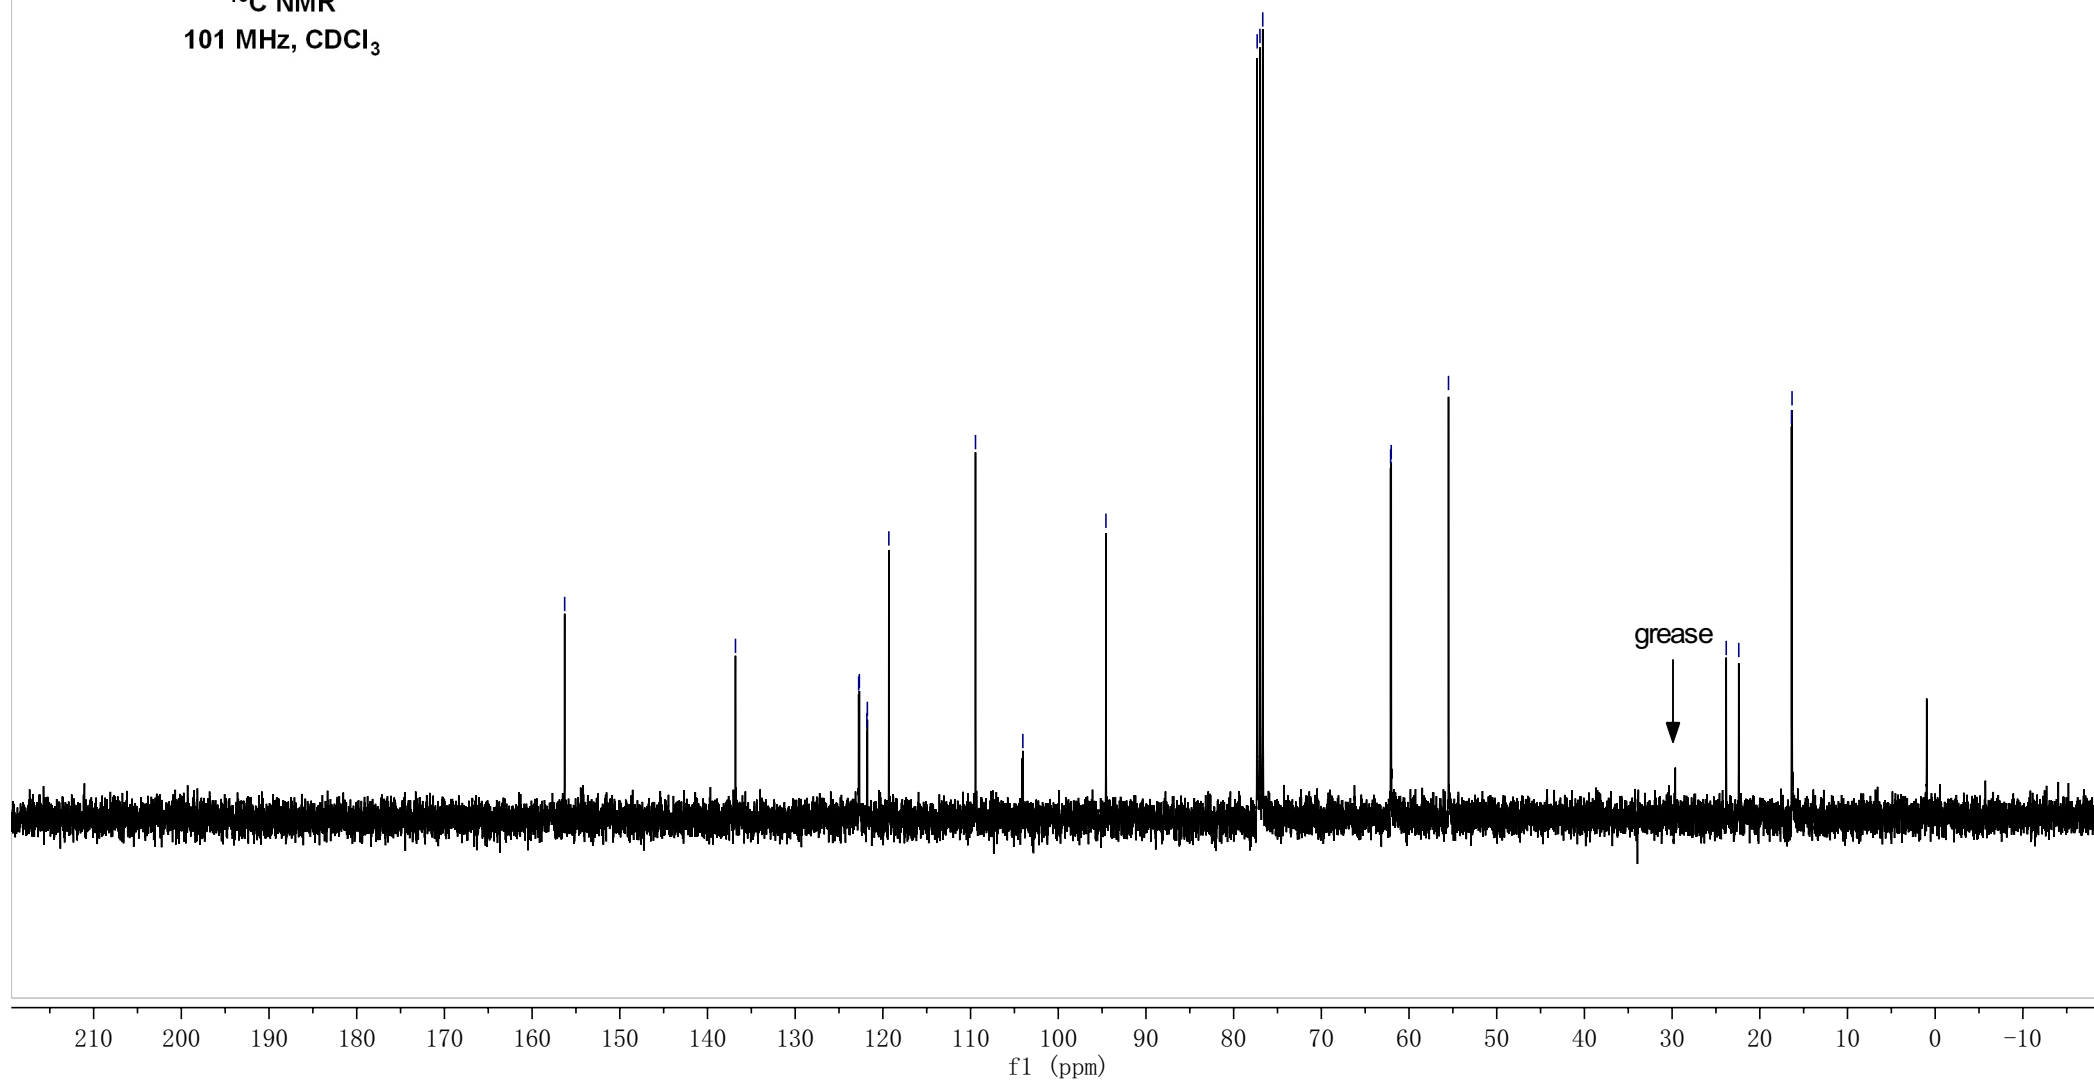

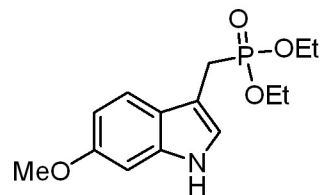

**3ia**

**<sup>31</sup>P NMR**

**162 MHz, CDCl<sub>3</sub>**

—28.14

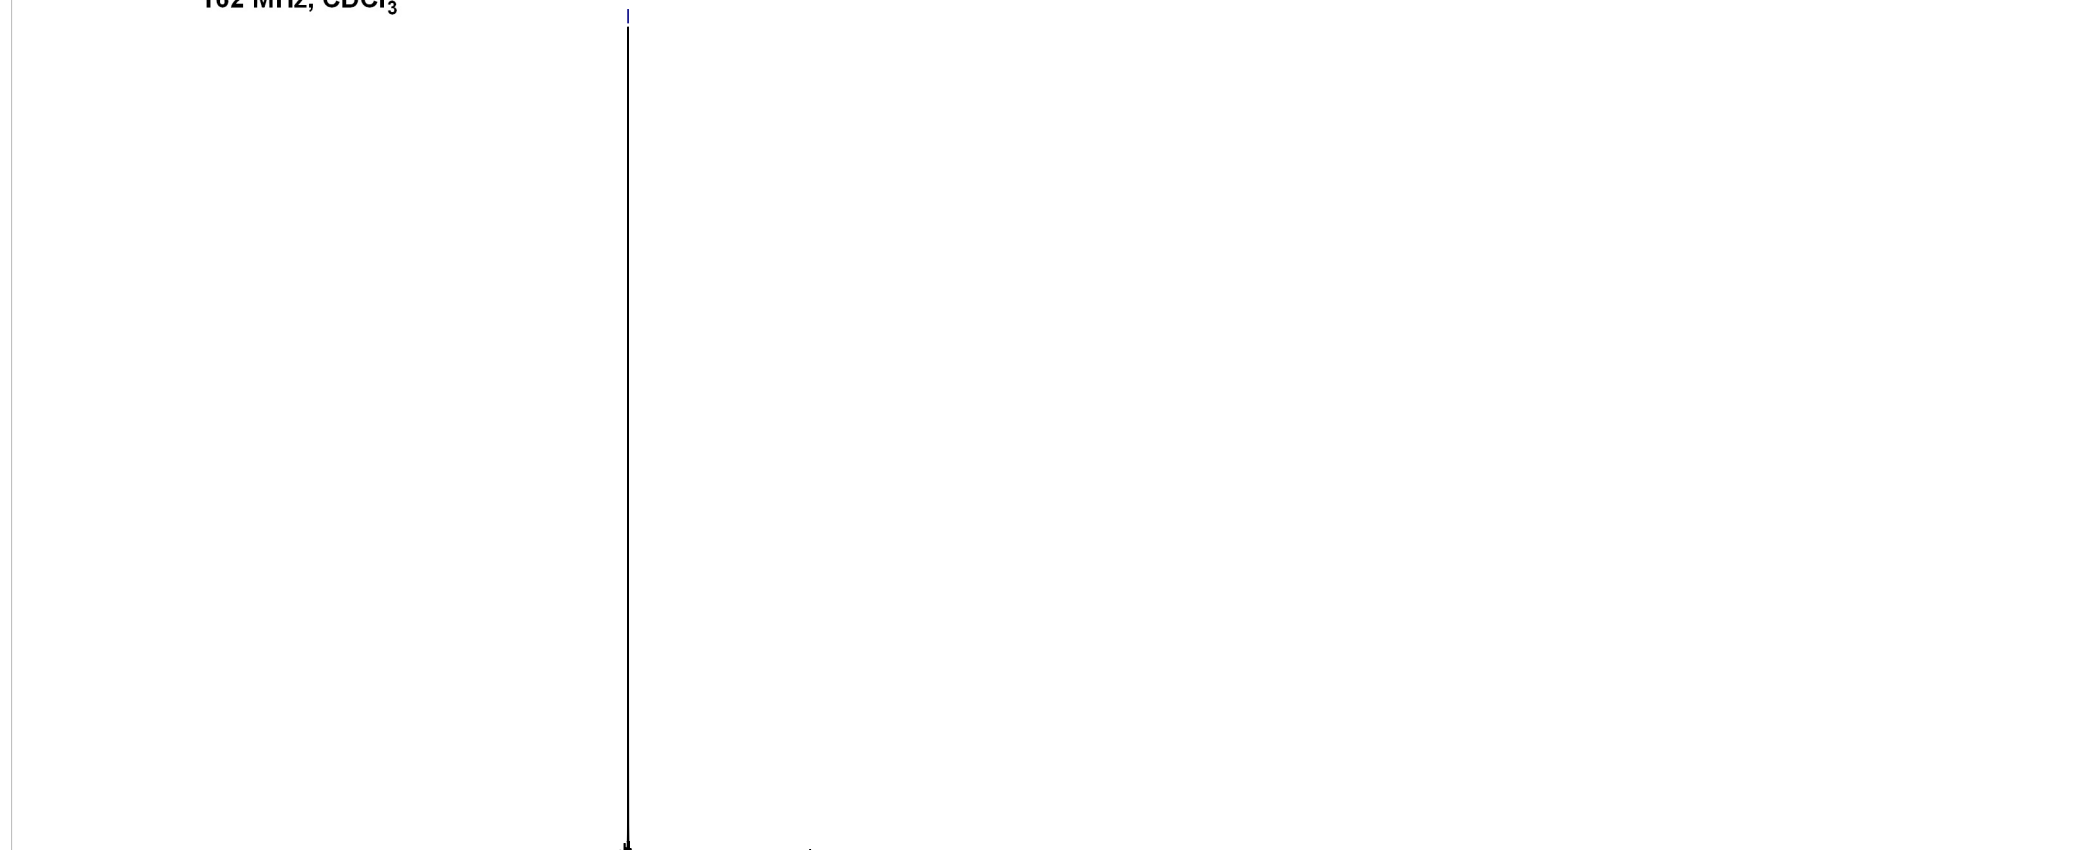

130 110 90 80 70 60 50 40 30 20 10 0 -10 -30 -50 -70 -90 -110 -130 -150 -170 -190 -210 -230

f1 (ppm)

S78

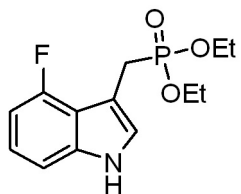

3ja

<sup>1</sup>H NMR

400 MHz, CDCl<sub>3</sub>

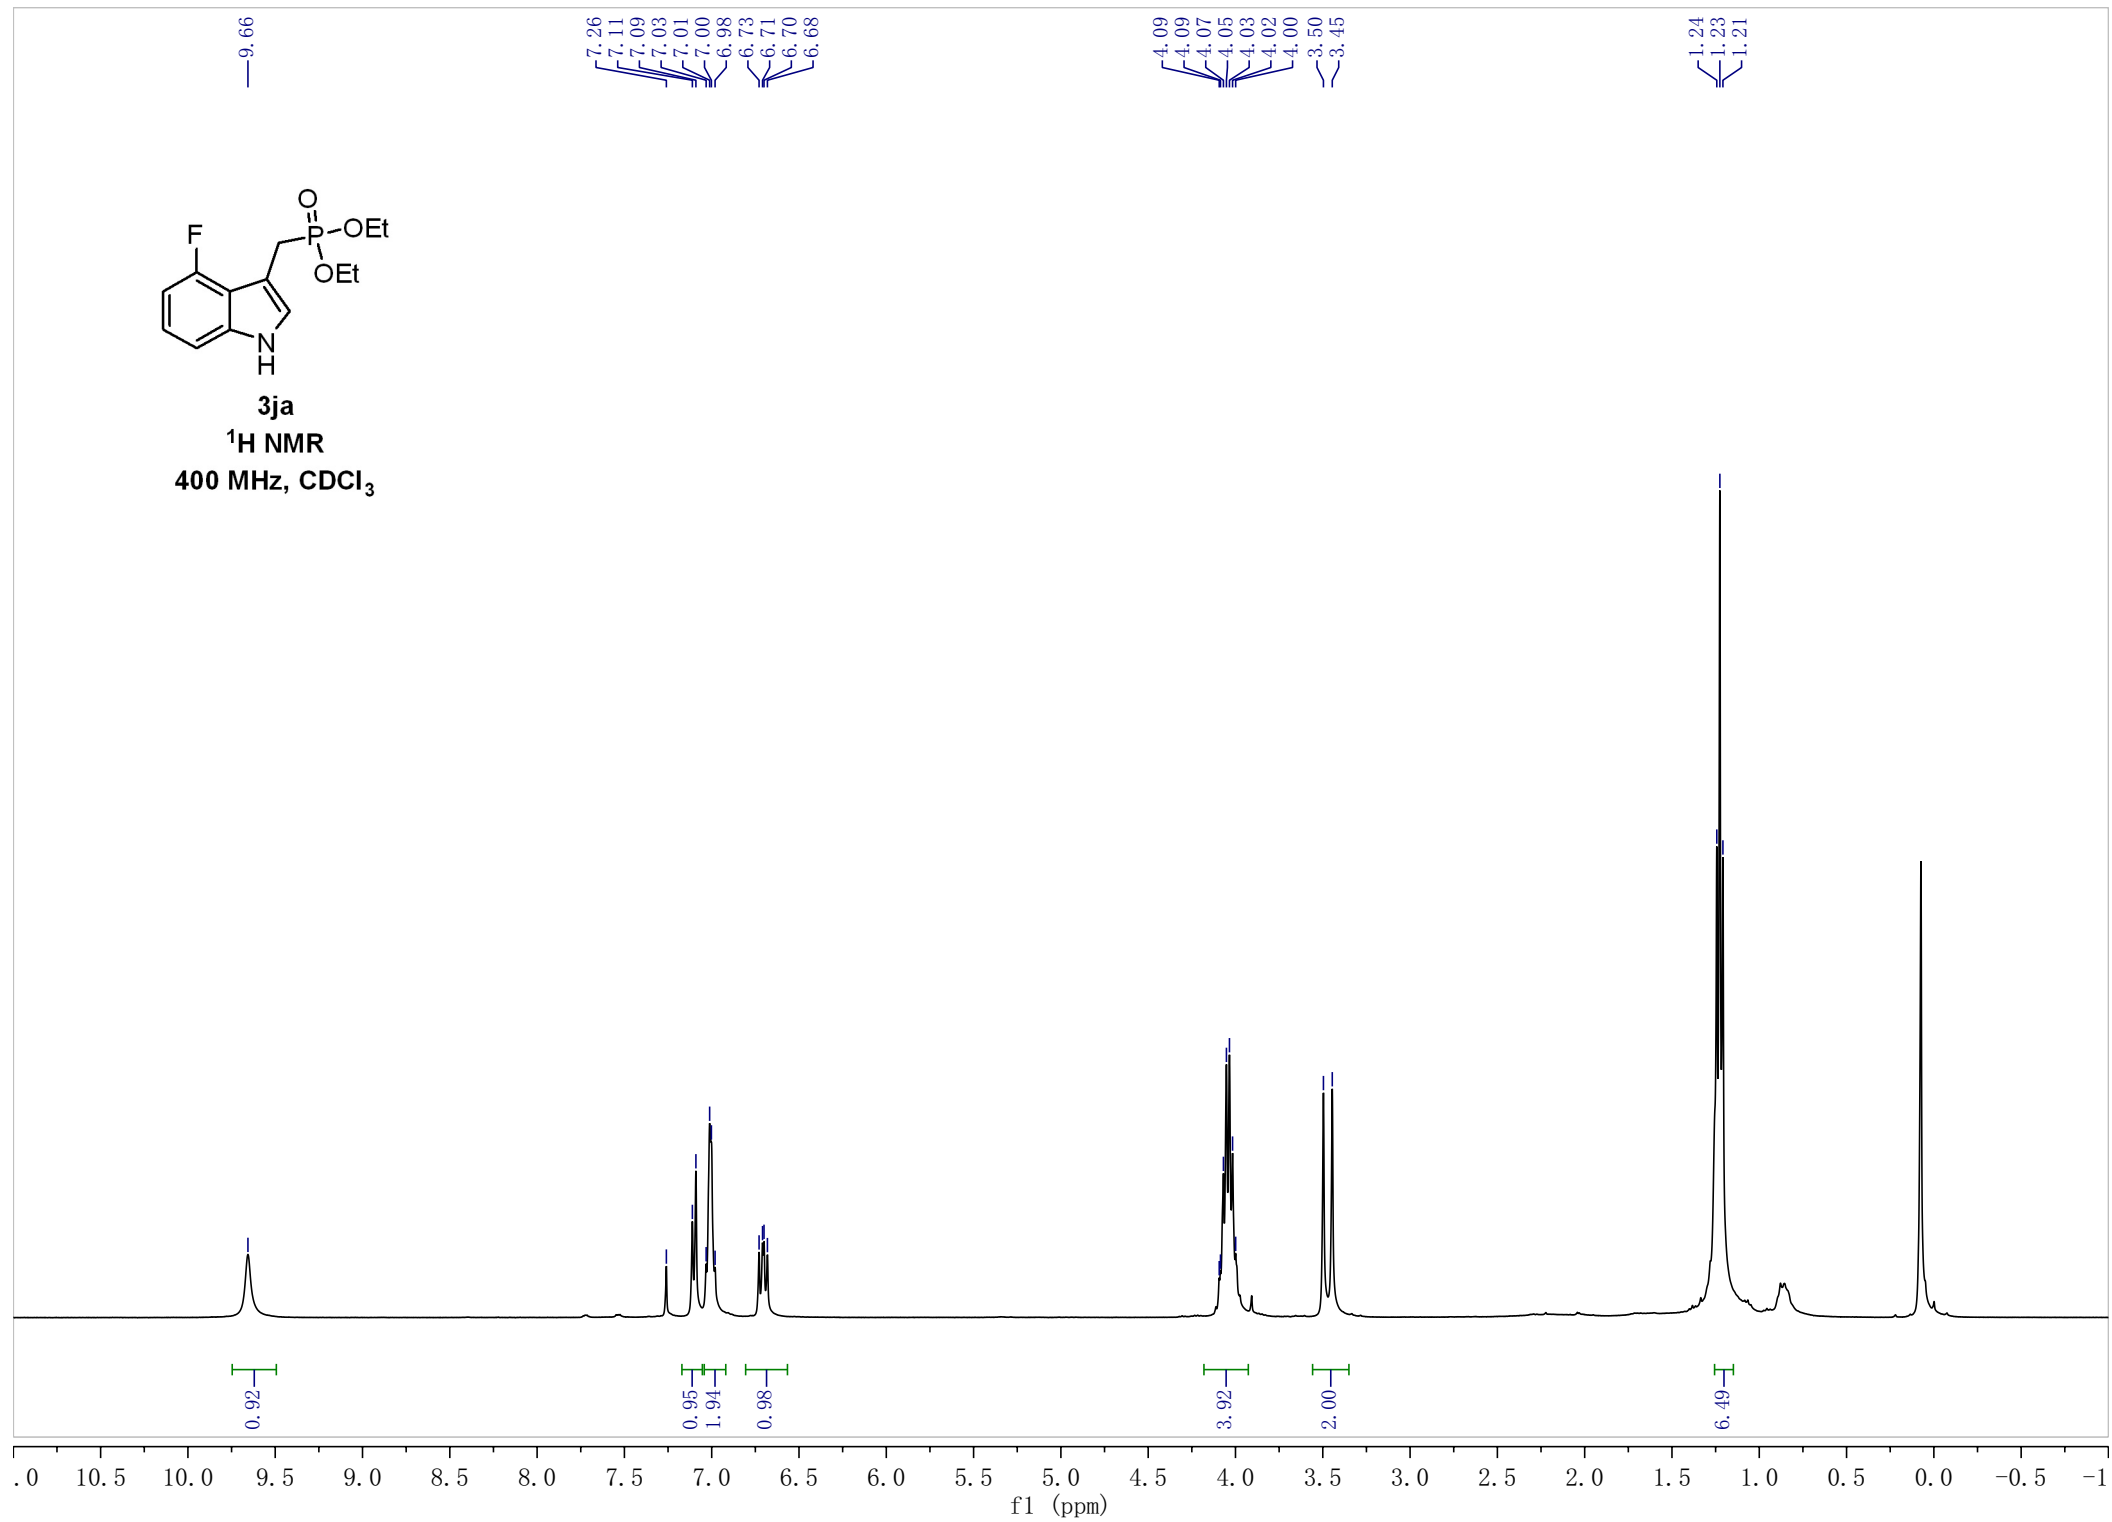

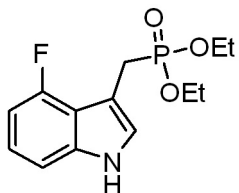

**3ja**

**<sup>13</sup>C NMR**  
**101 MHz, CDCl<sub>3</sub>**

158.22  
155.79

138.89  
138.78

124.44  
124.37  
121.99  
121.91

107.76  
107.73  
104.31  
104.12  
102.17  
102.08

77.32  
77.00  
76.68

62.17  
62.10

24.25  
22.86

16.28  
16.22

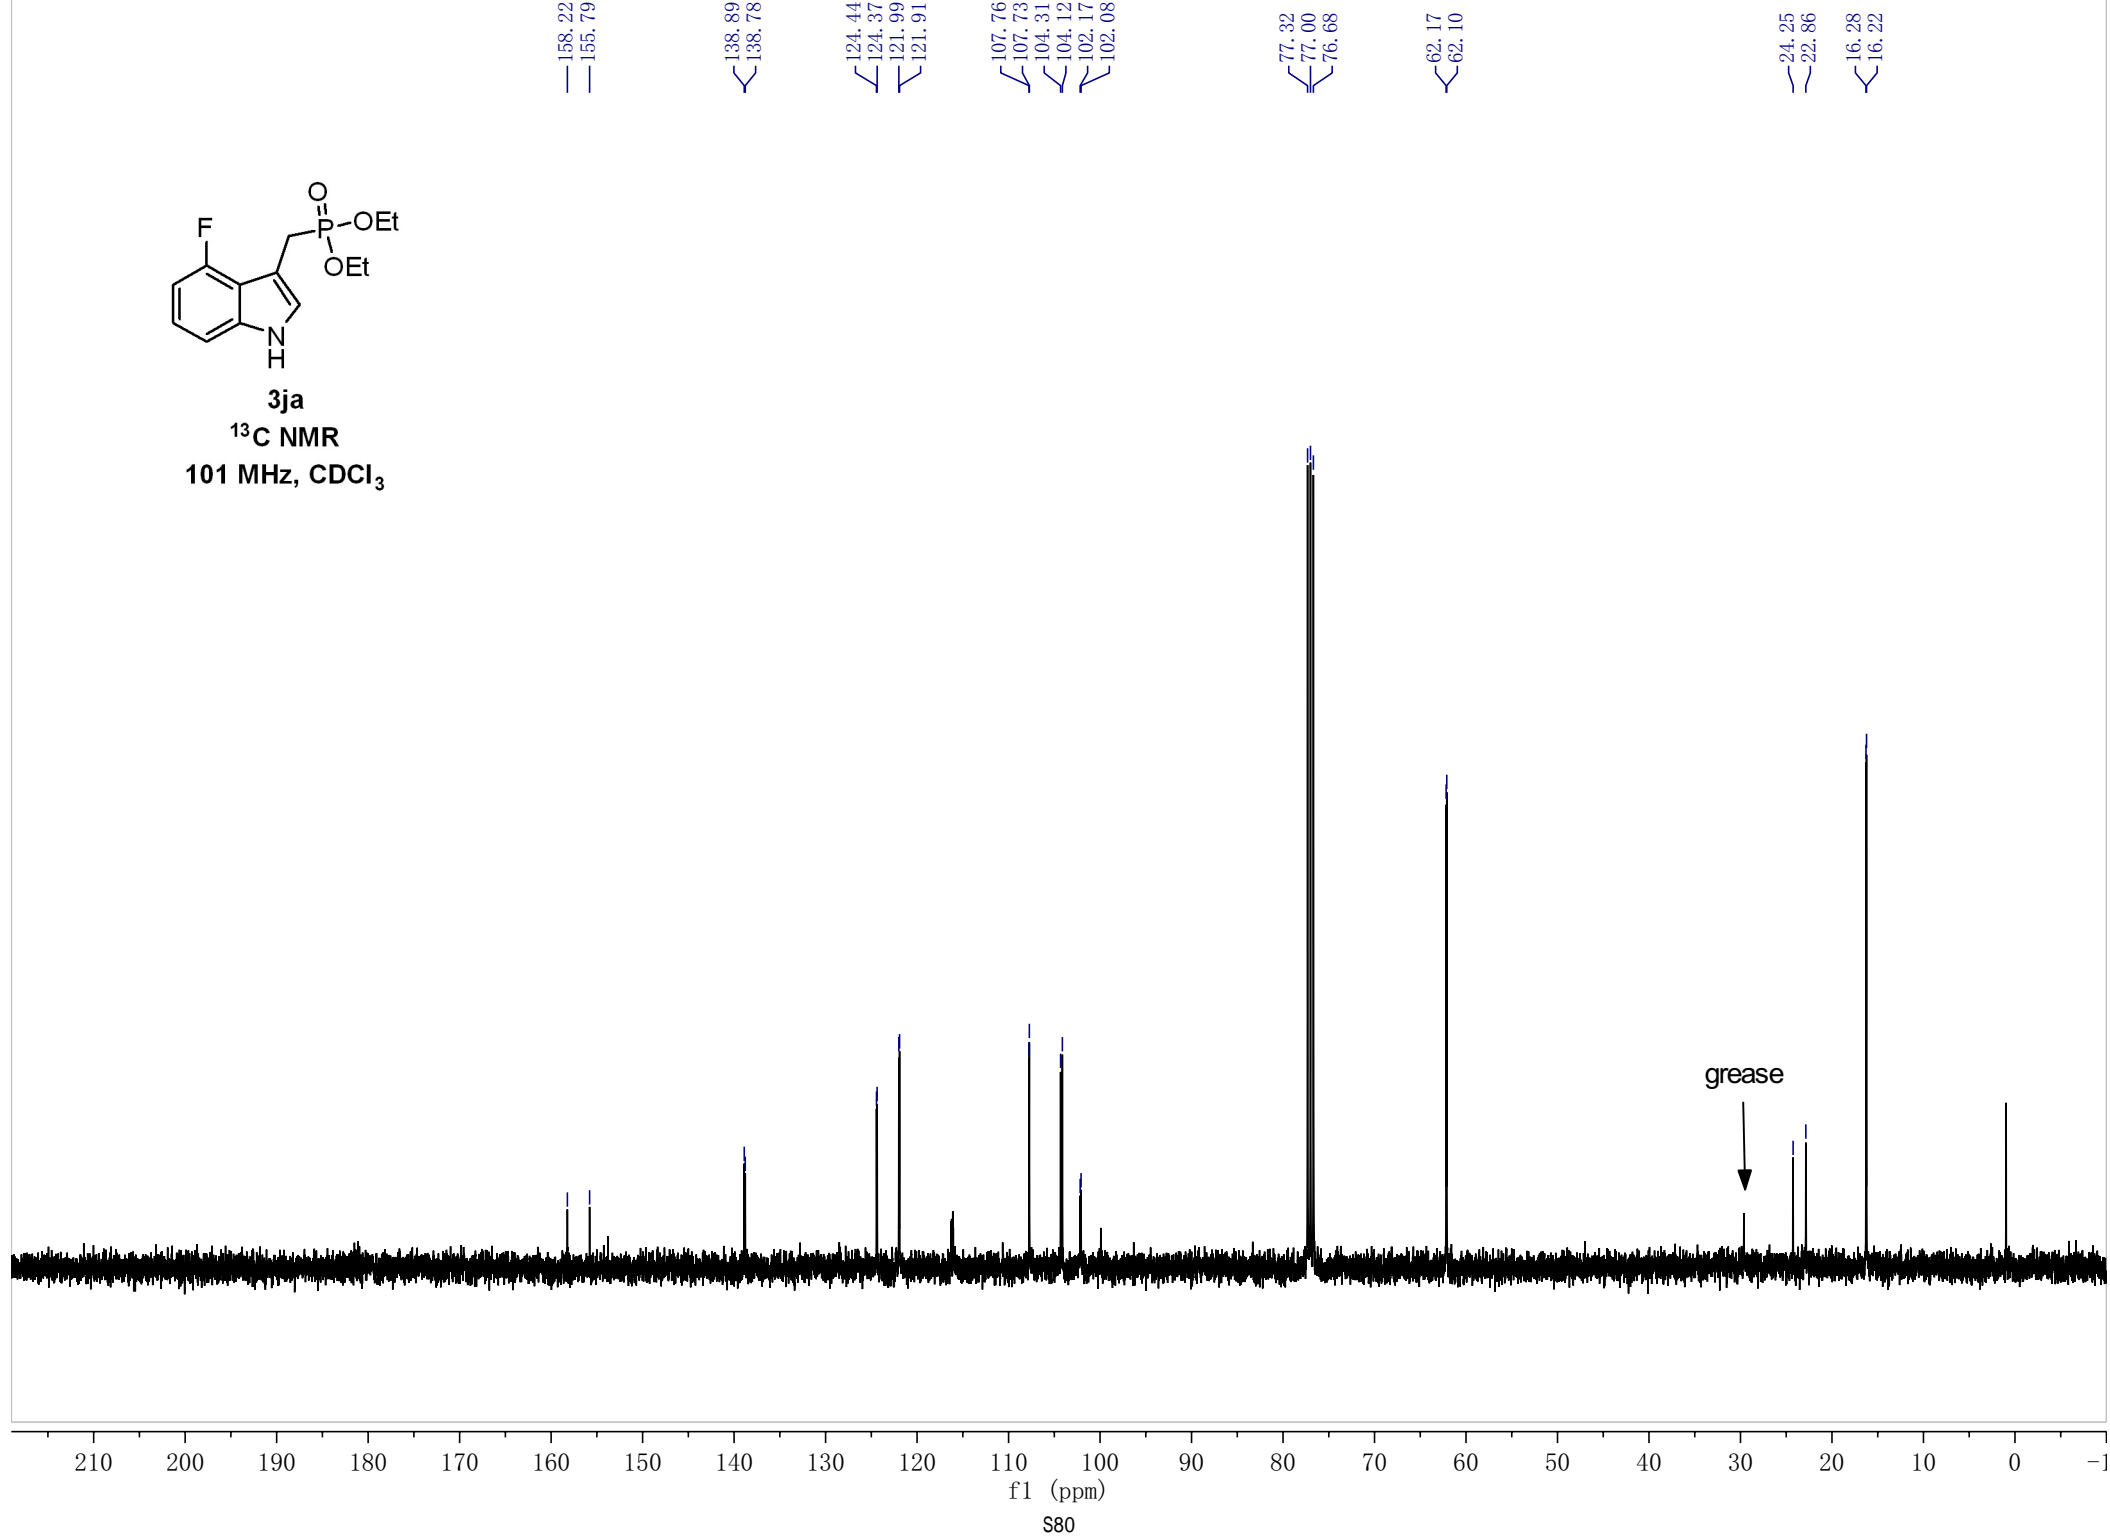

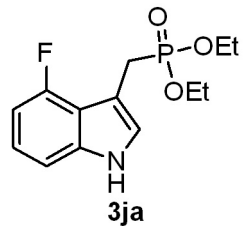

<sup>19</sup>F NMR  
376 MHz, CDCl<sub>3</sub>

-125.68

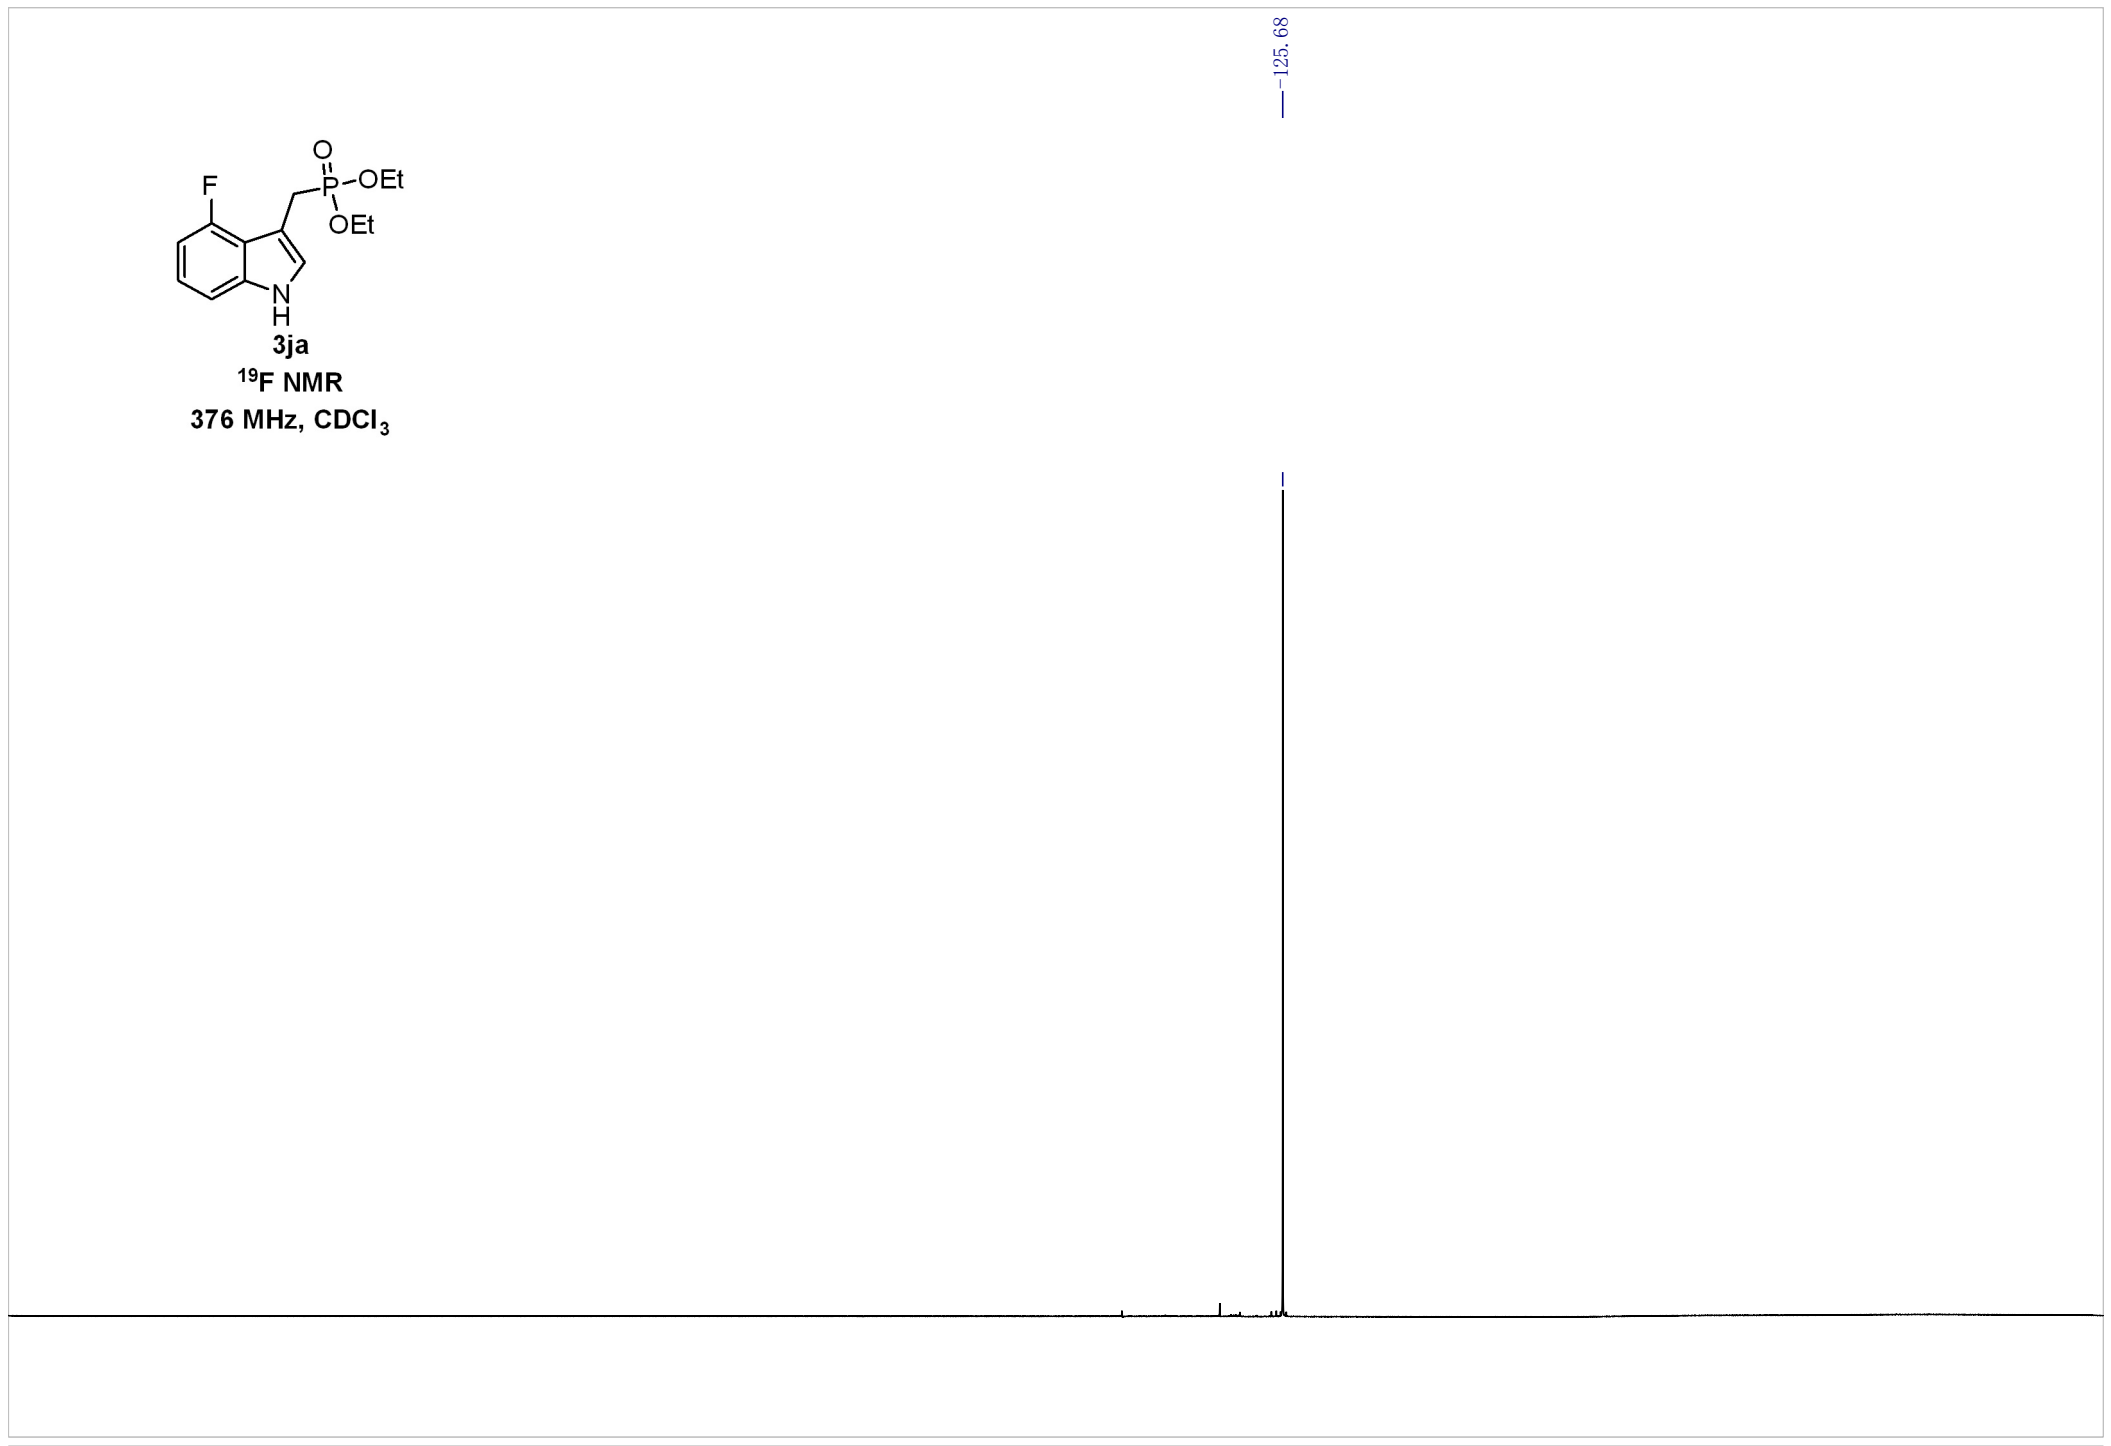

10 0 -10 -20 -30 -40 -50 -60 -70 -80 -90 -100 -110 -120 -130 -140 -150 -160 -170 -180 -190 -200 -210

f1 (ppm)

S81

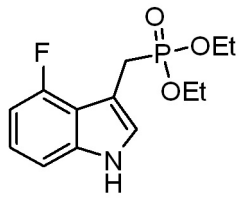

3ja

<sup>31</sup>P NMR  
162 MHz, CDCl<sub>3</sub>

—27.95

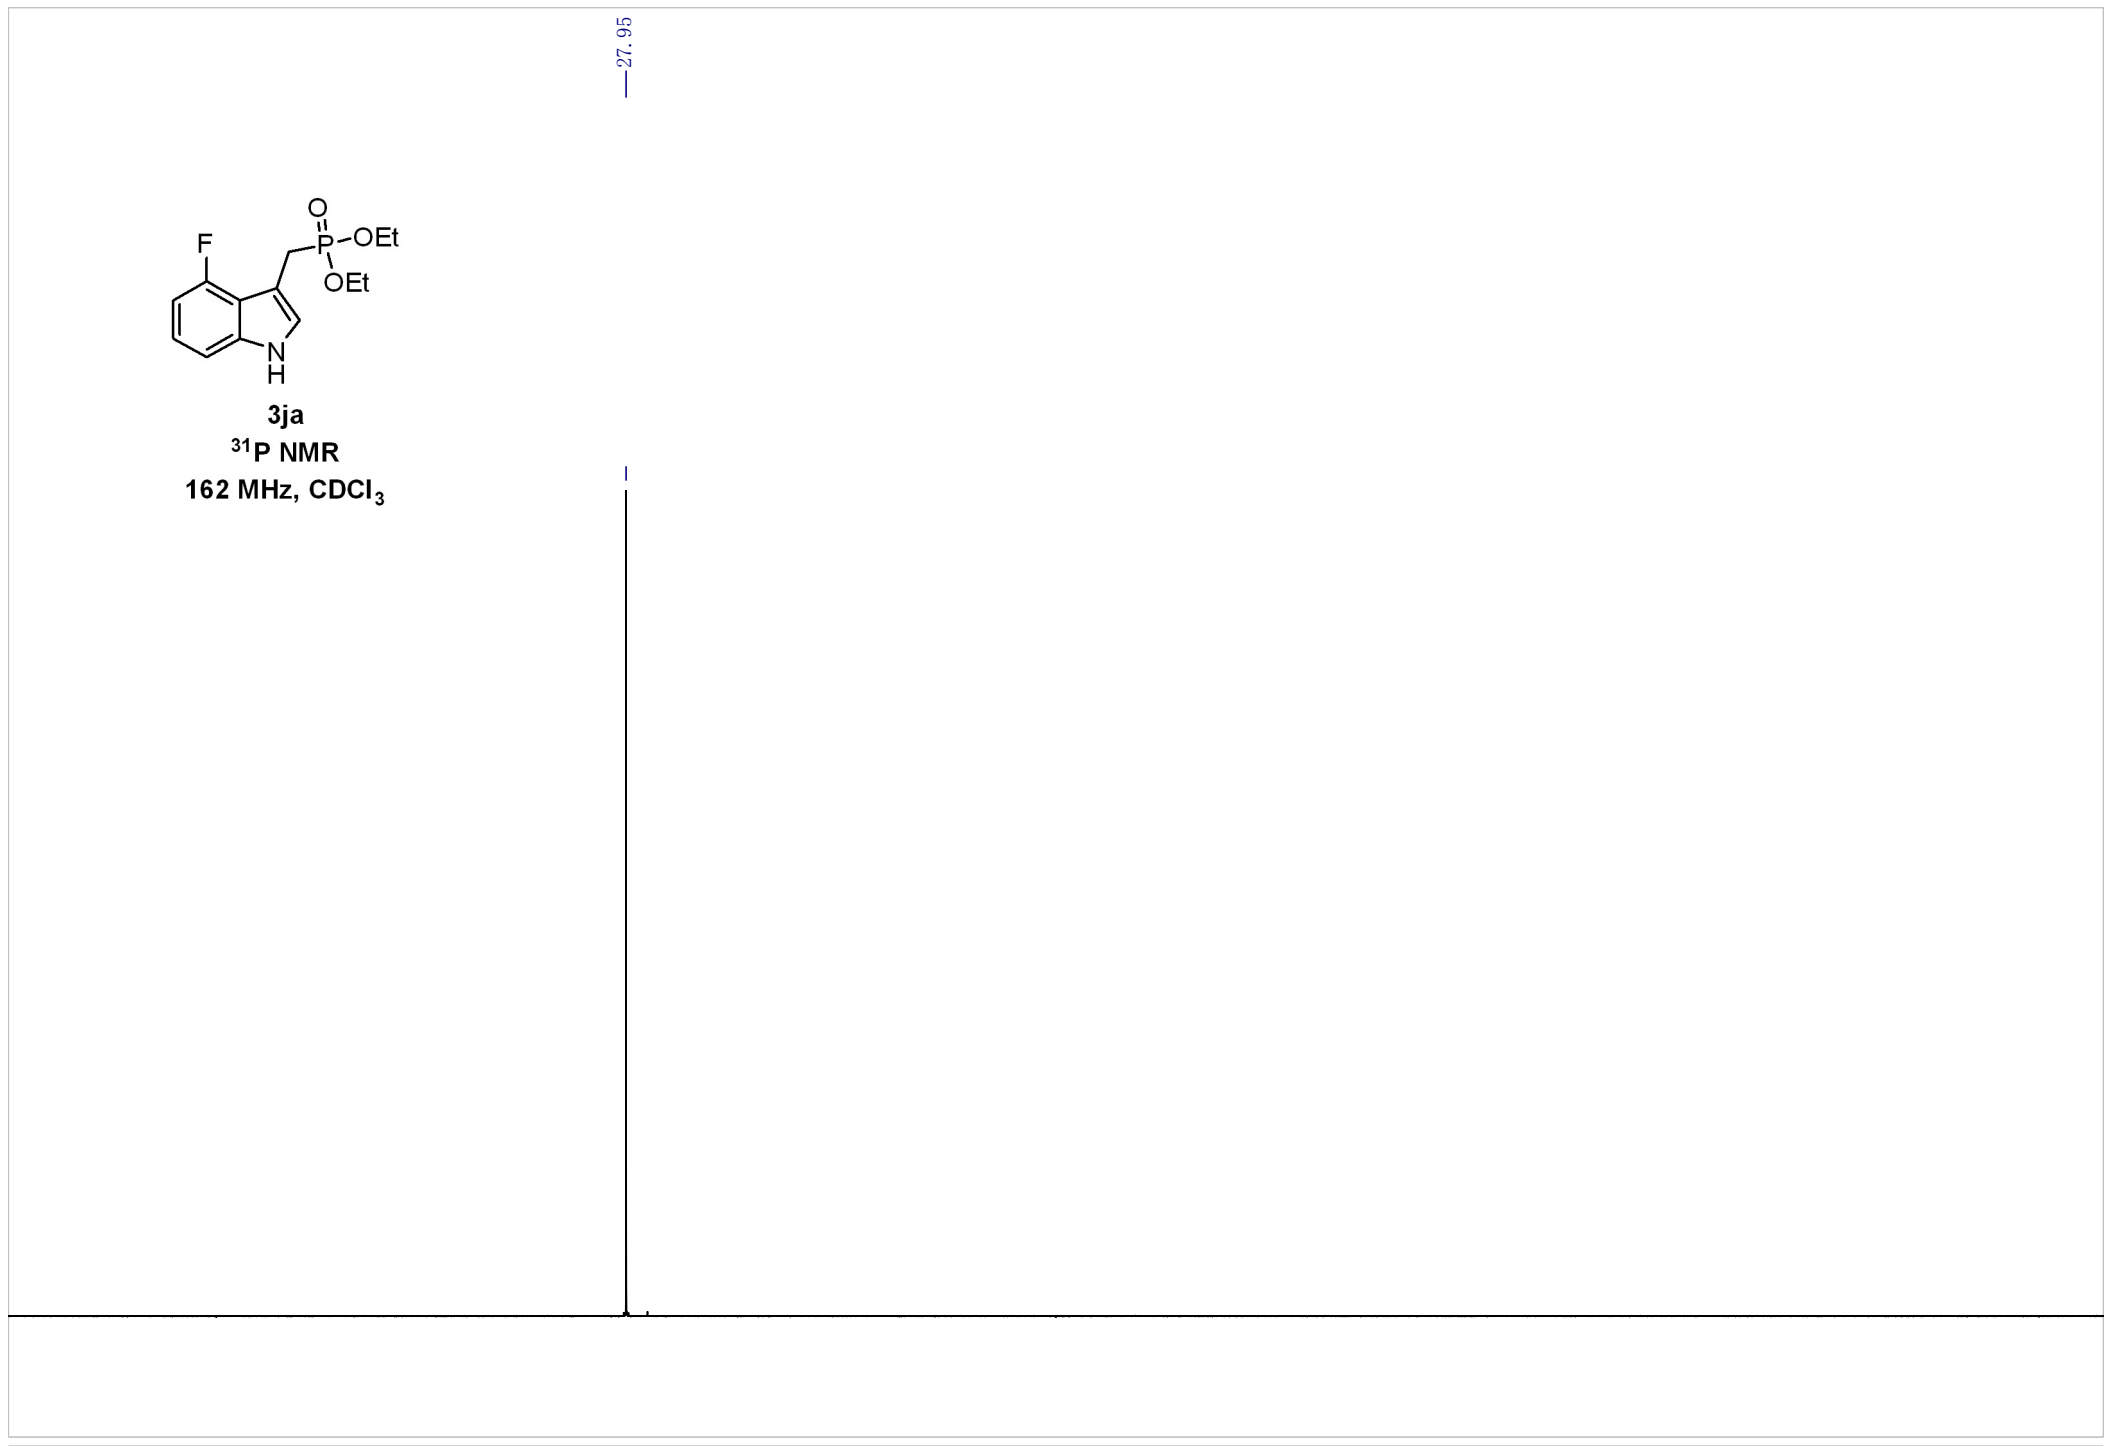

130 110 90 80 70 60 50 40 30 20 10 0 -10 -30 -50 -70 -90 -110 -130 -150 -170 -190 -210 -230

f1 (ppm)

S82

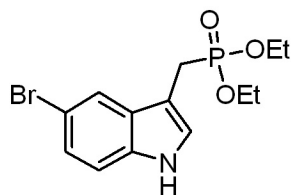

**3la**

**<sup>1</sup>H NMR**  
**400 MHz, CDCl<sub>3</sub>**

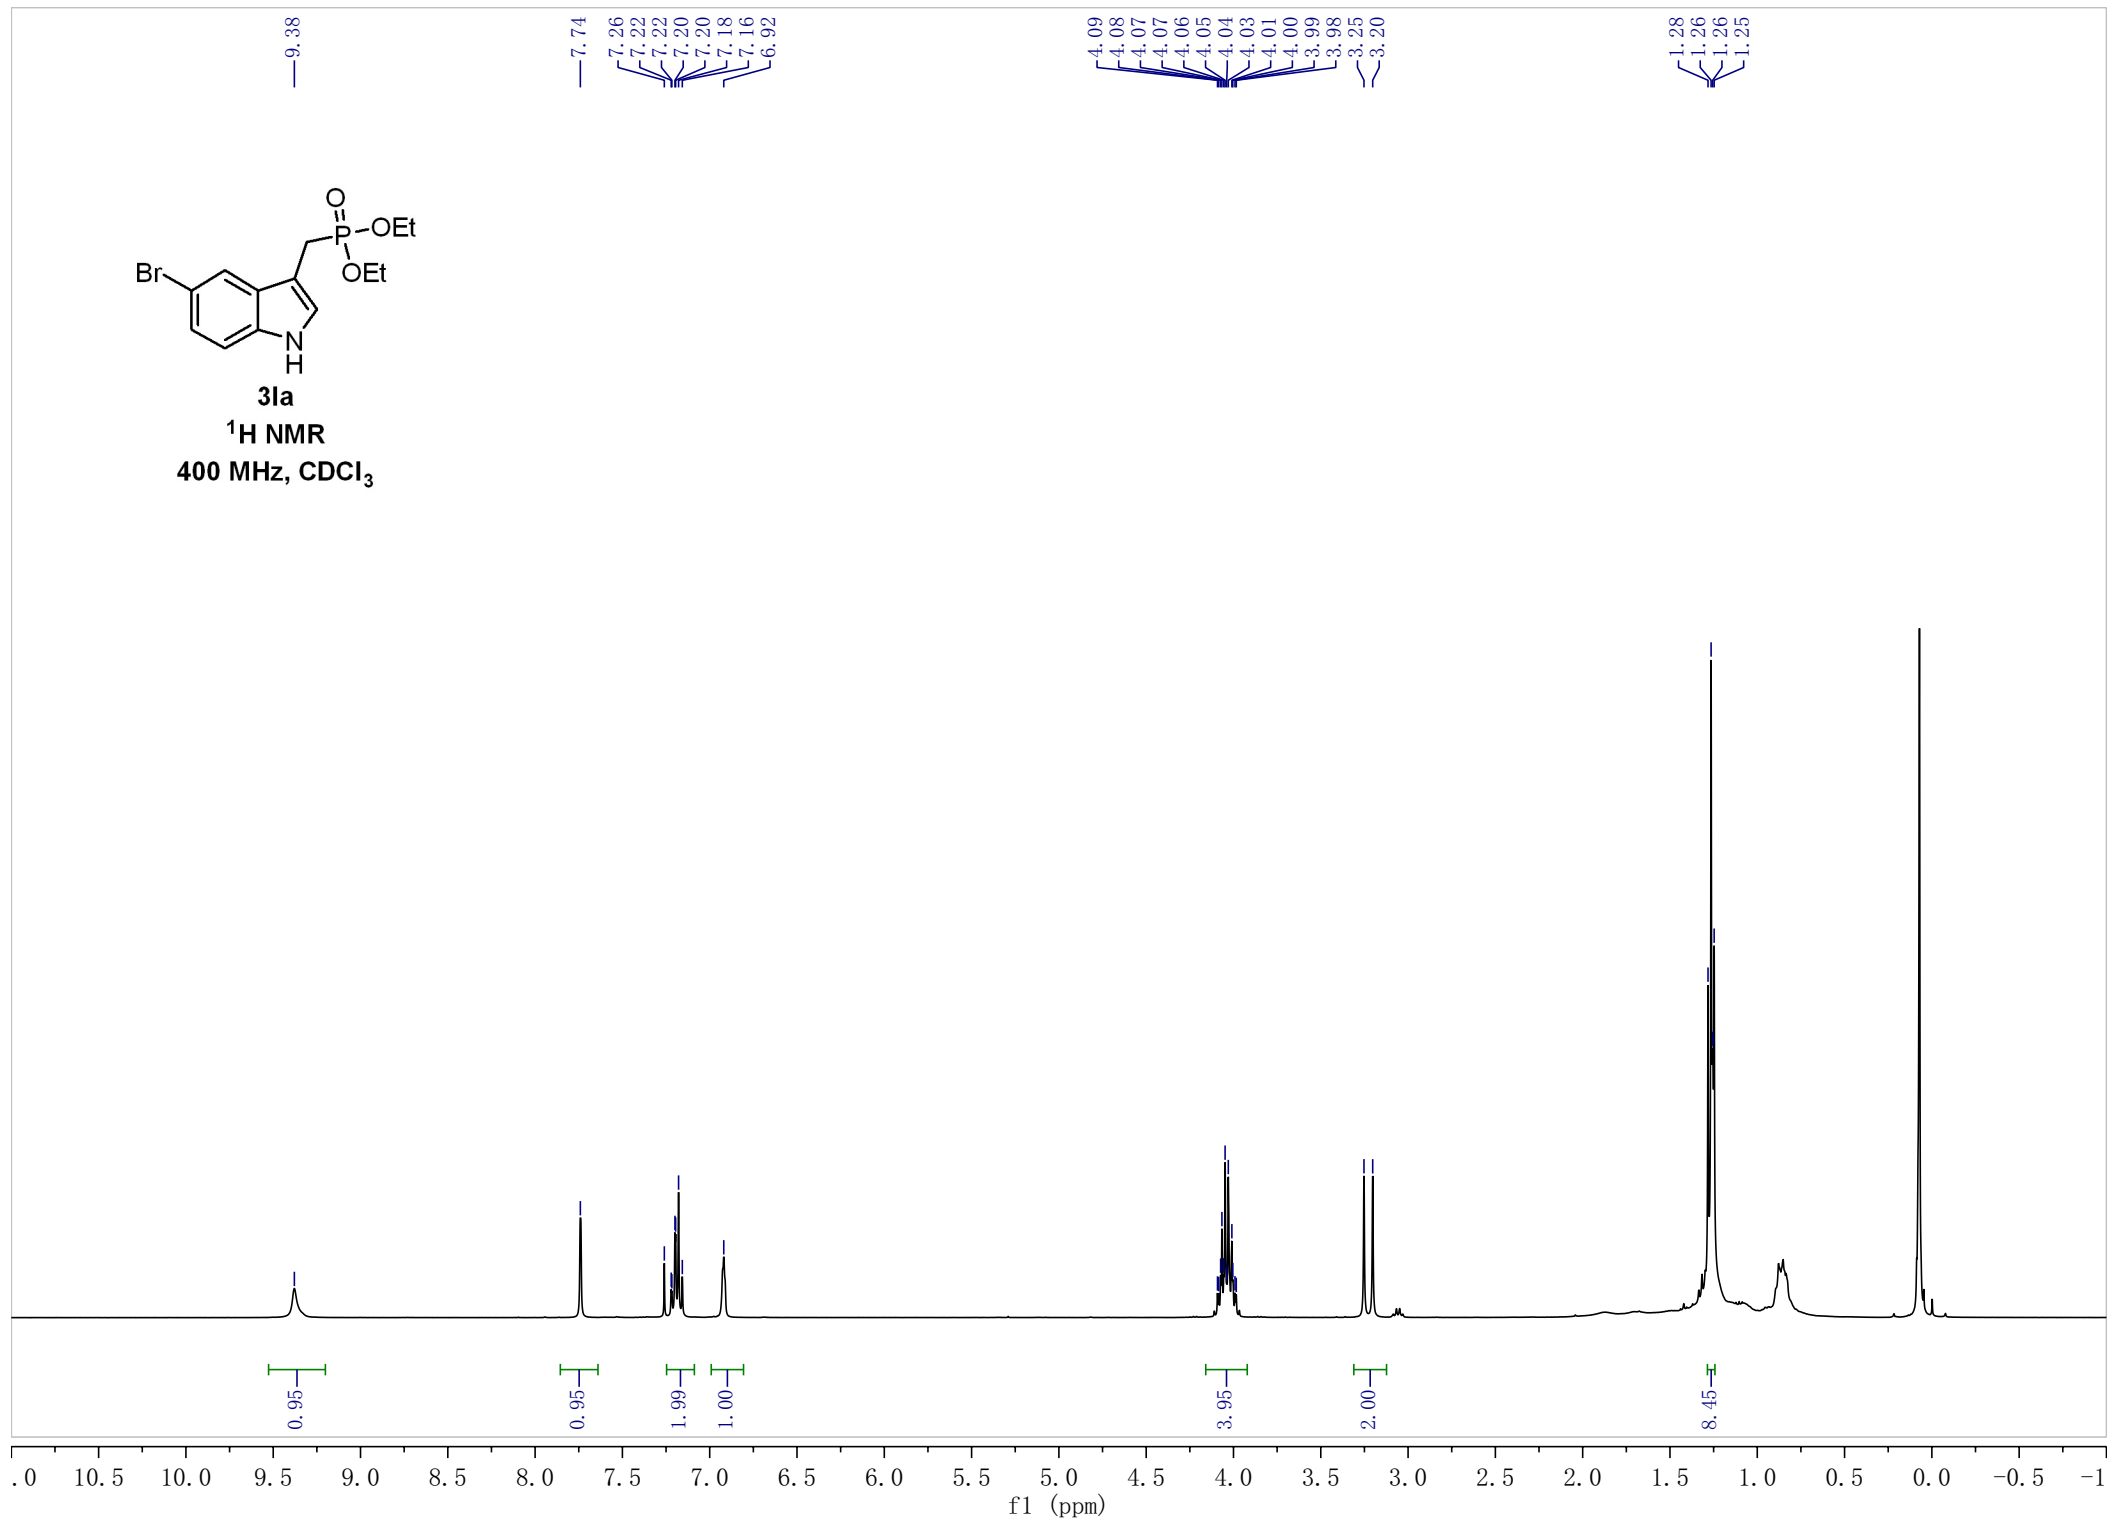

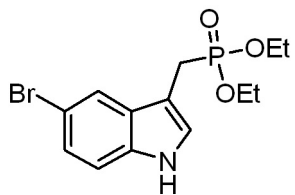

**3la**

**<sup>13</sup>C NMR**  
**101 MHz, CDCl<sub>3</sub>**

134.76  
128.96  
125.27  
124.59  
121.44  
112.88  
112.54  
103.91  
77.32  
77.00  
76.68  
62.24  
62.17  
29.67  
23.77  
22.33  
16.41  
16.35

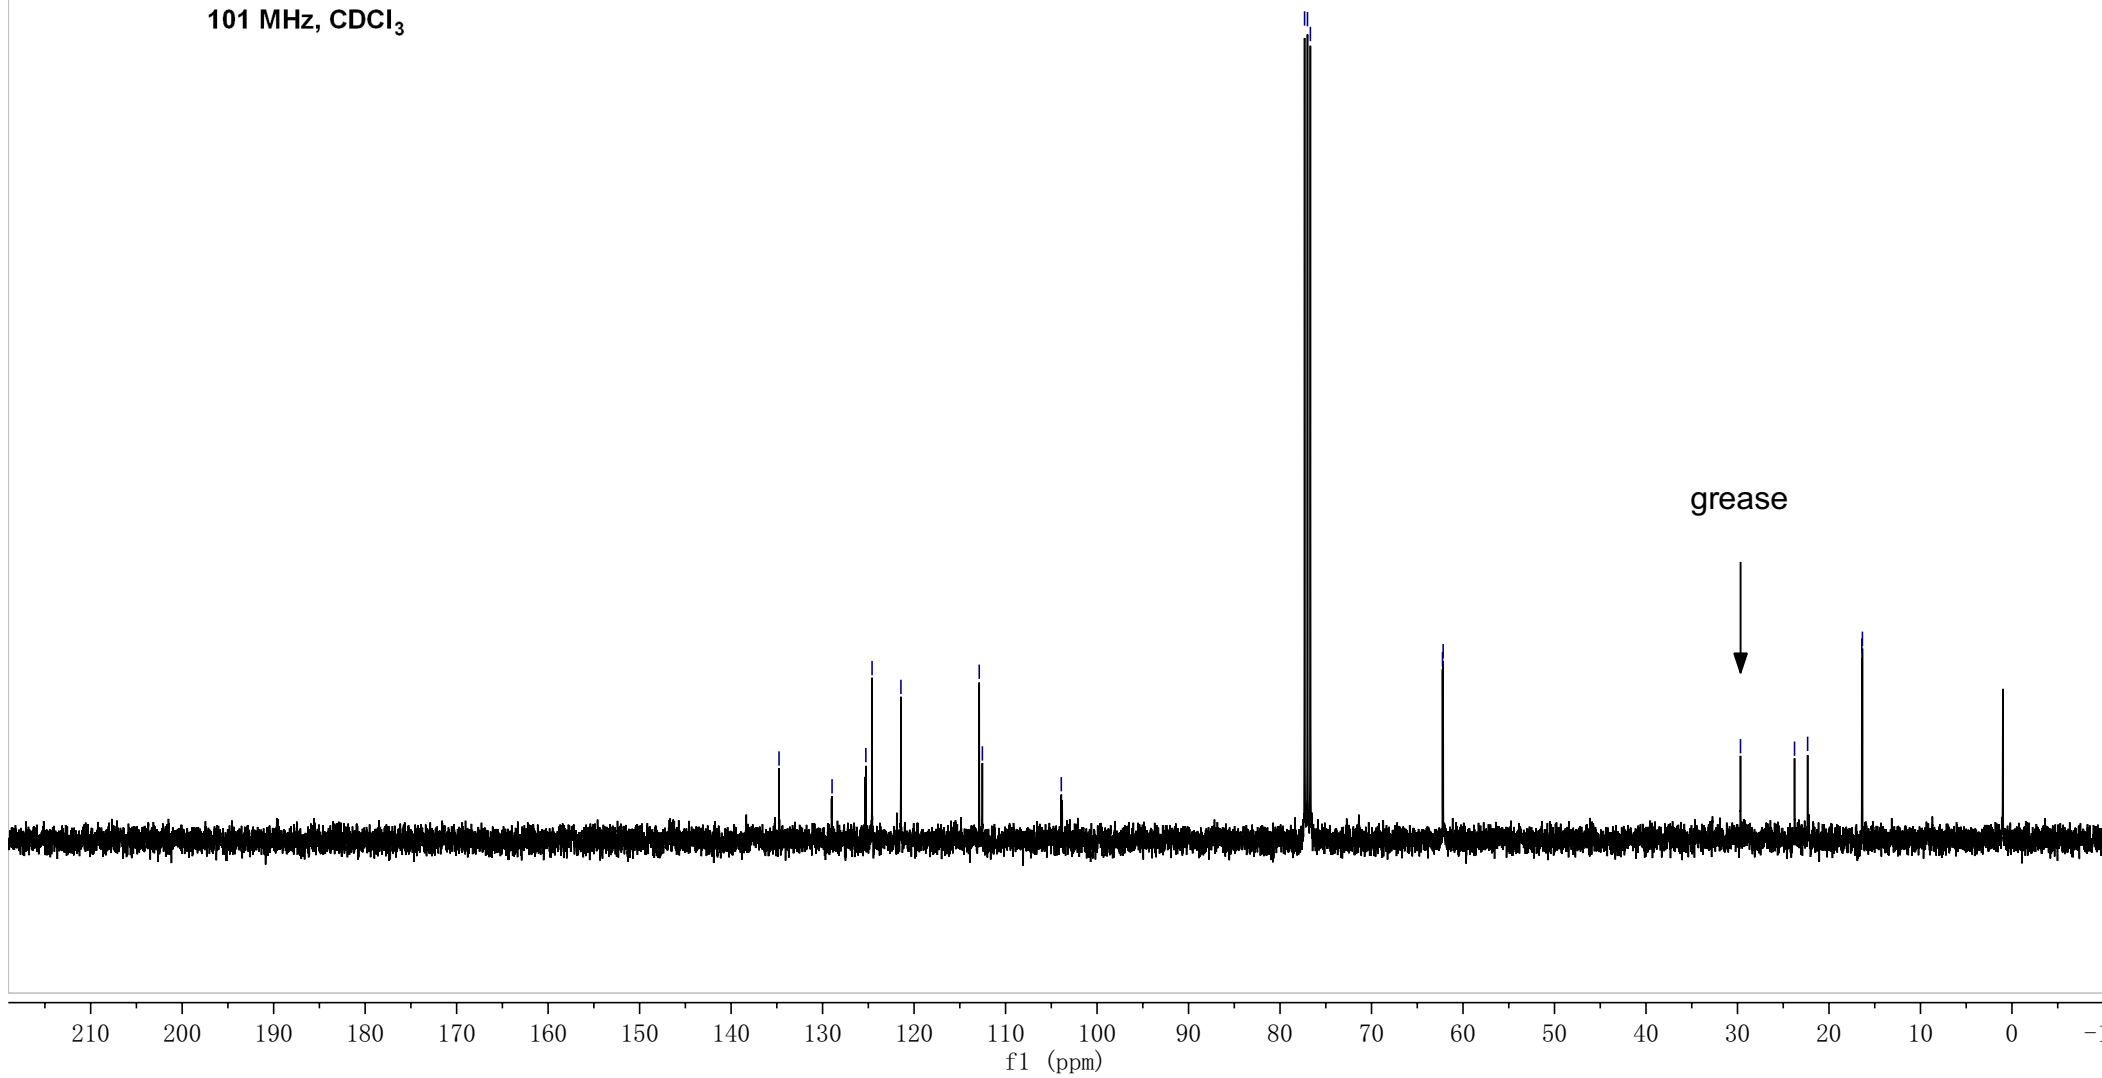



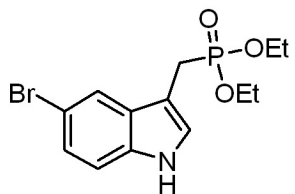

**3a**

**<sup>31</sup>P NMR**  
**162 MHz, CDCl<sub>3</sub>**

—27.63

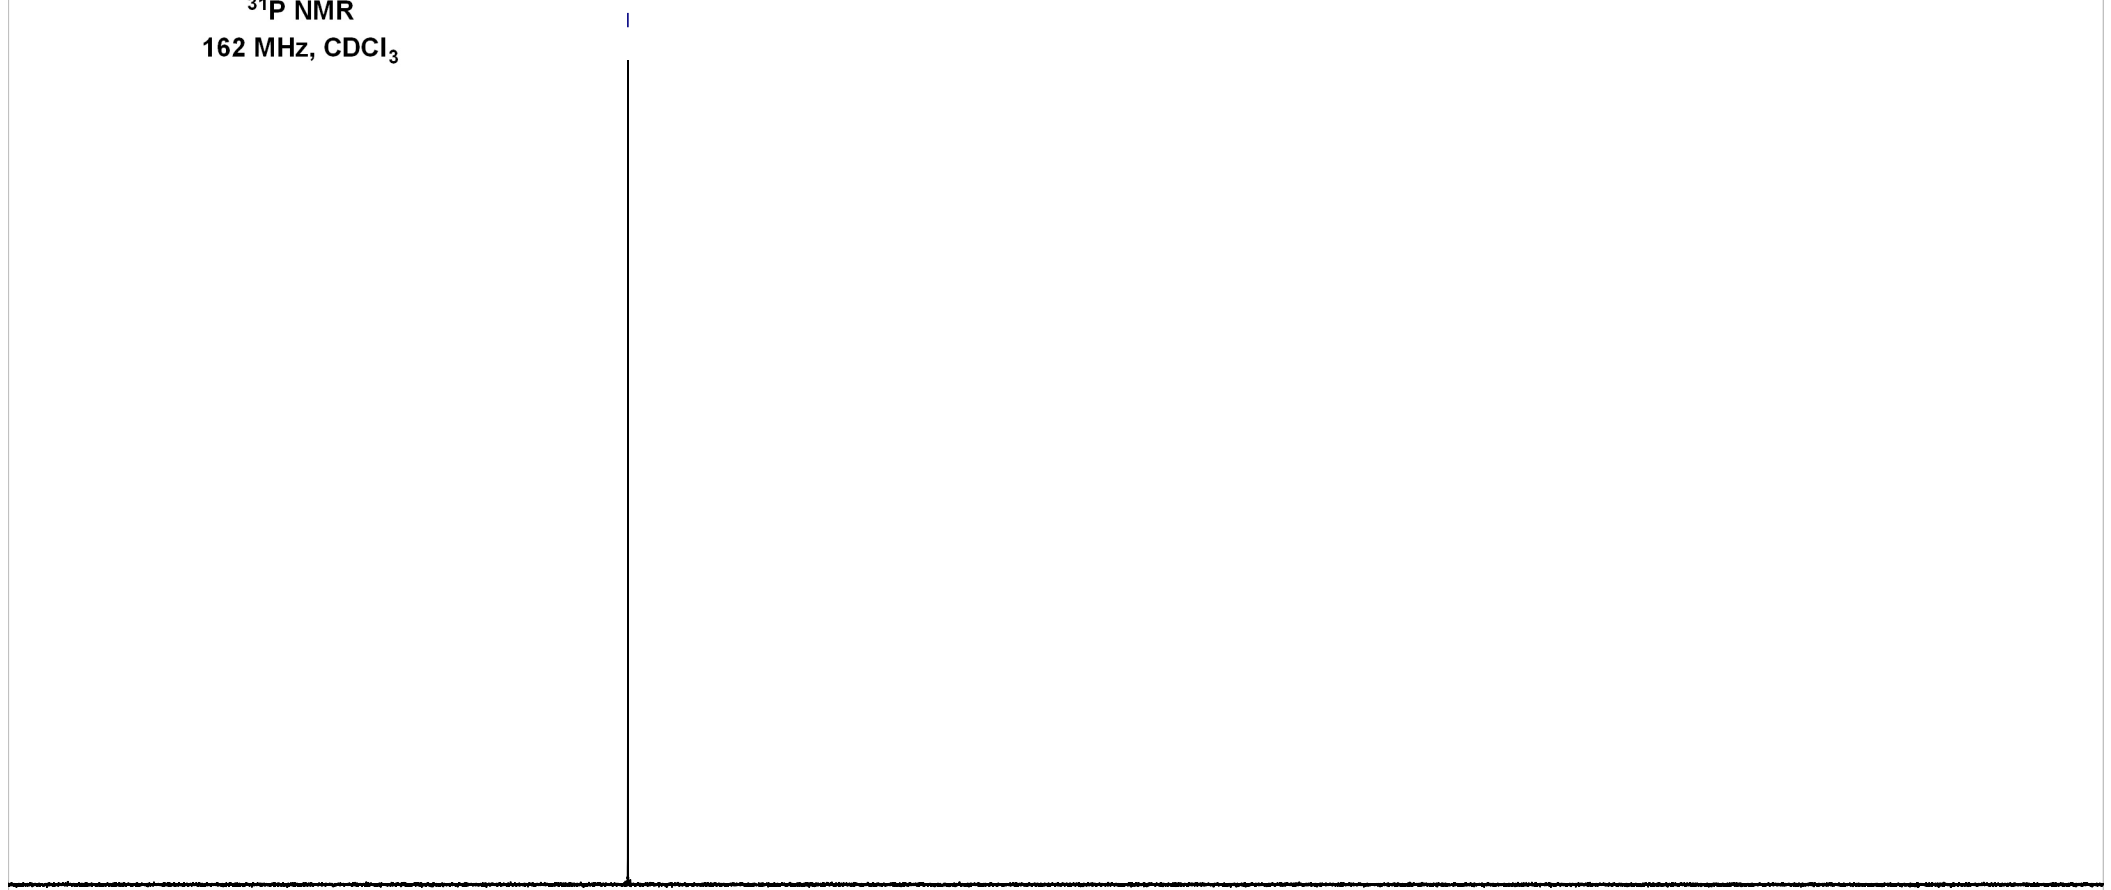

130 110 90 80 70 60 50 40 30 20 10 0 -10 -30 -50 -70 -90 -110 -130 -150 -170 -190 -210 -230

f1 (ppm)

S85

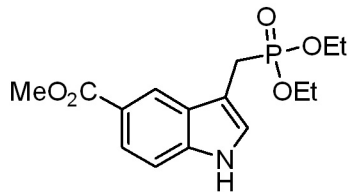

**3ma**

**<sup>1</sup>H NMR**  
**400 MHz, CDCl<sub>3</sub>**

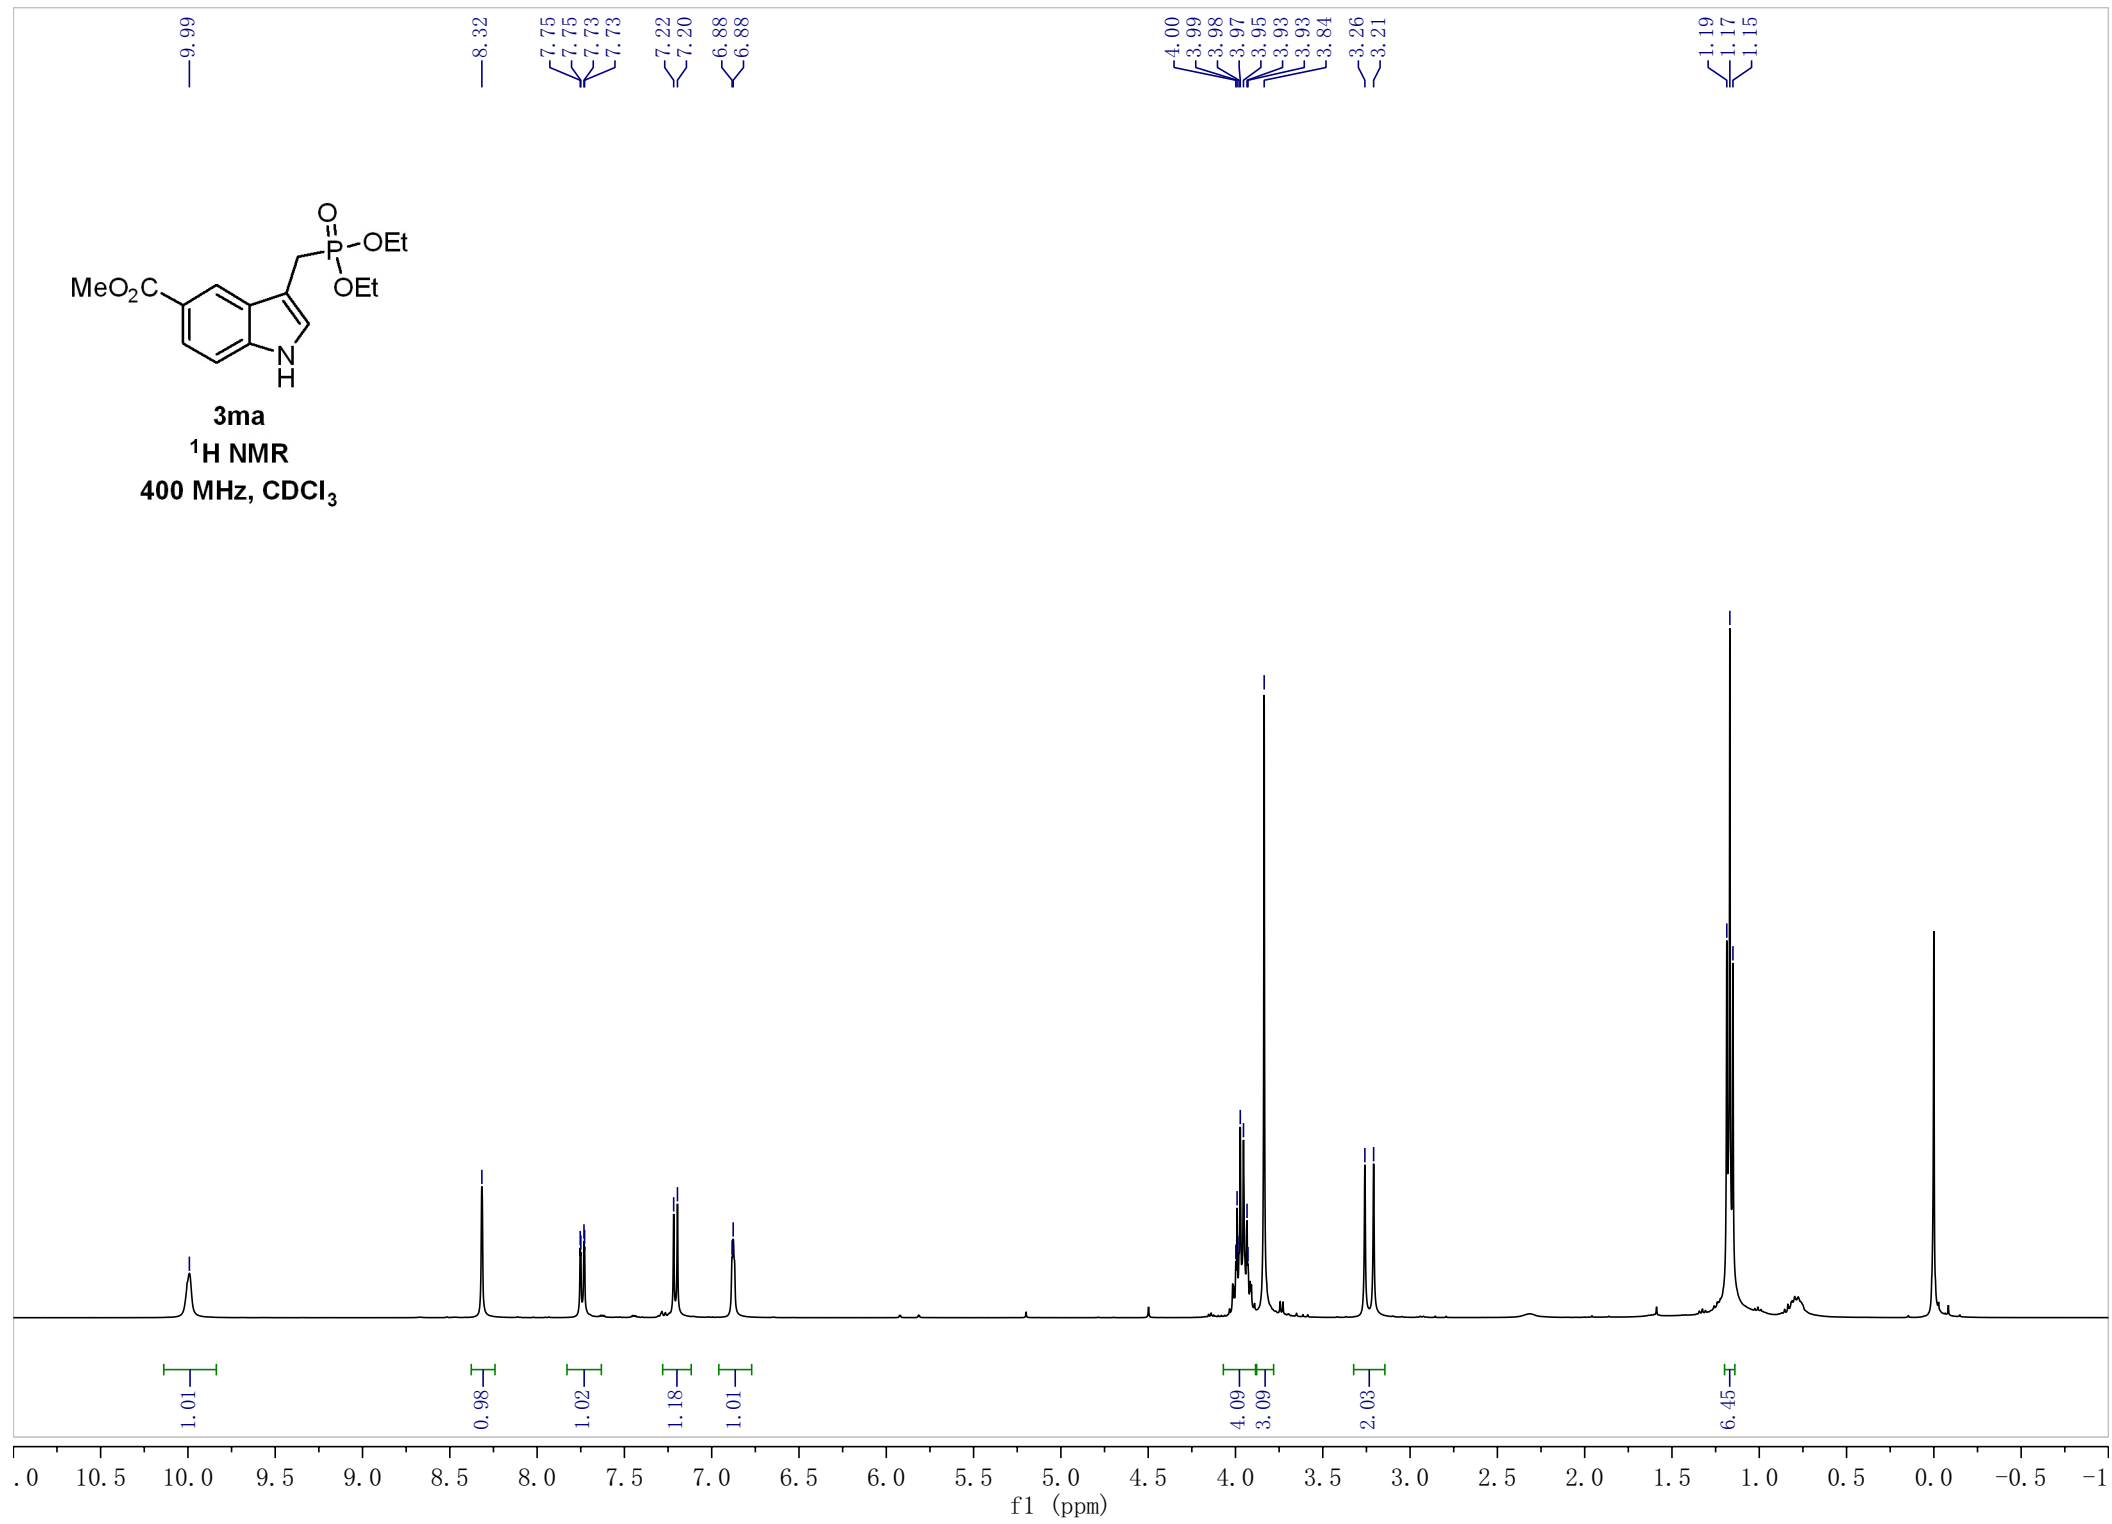

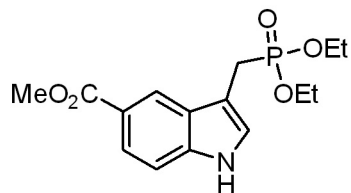

**3ma**  
**<sup>13</sup>C NMR**  
**101 MHz, CDCl<sub>3</sub>**

168.21

138.76

126.94

125.51

123.14

121.91

121.28

111.13

105.69

77.32

77.00

76.68

62.26

62.19

51.77

23.70

22.27

16.36

16.30

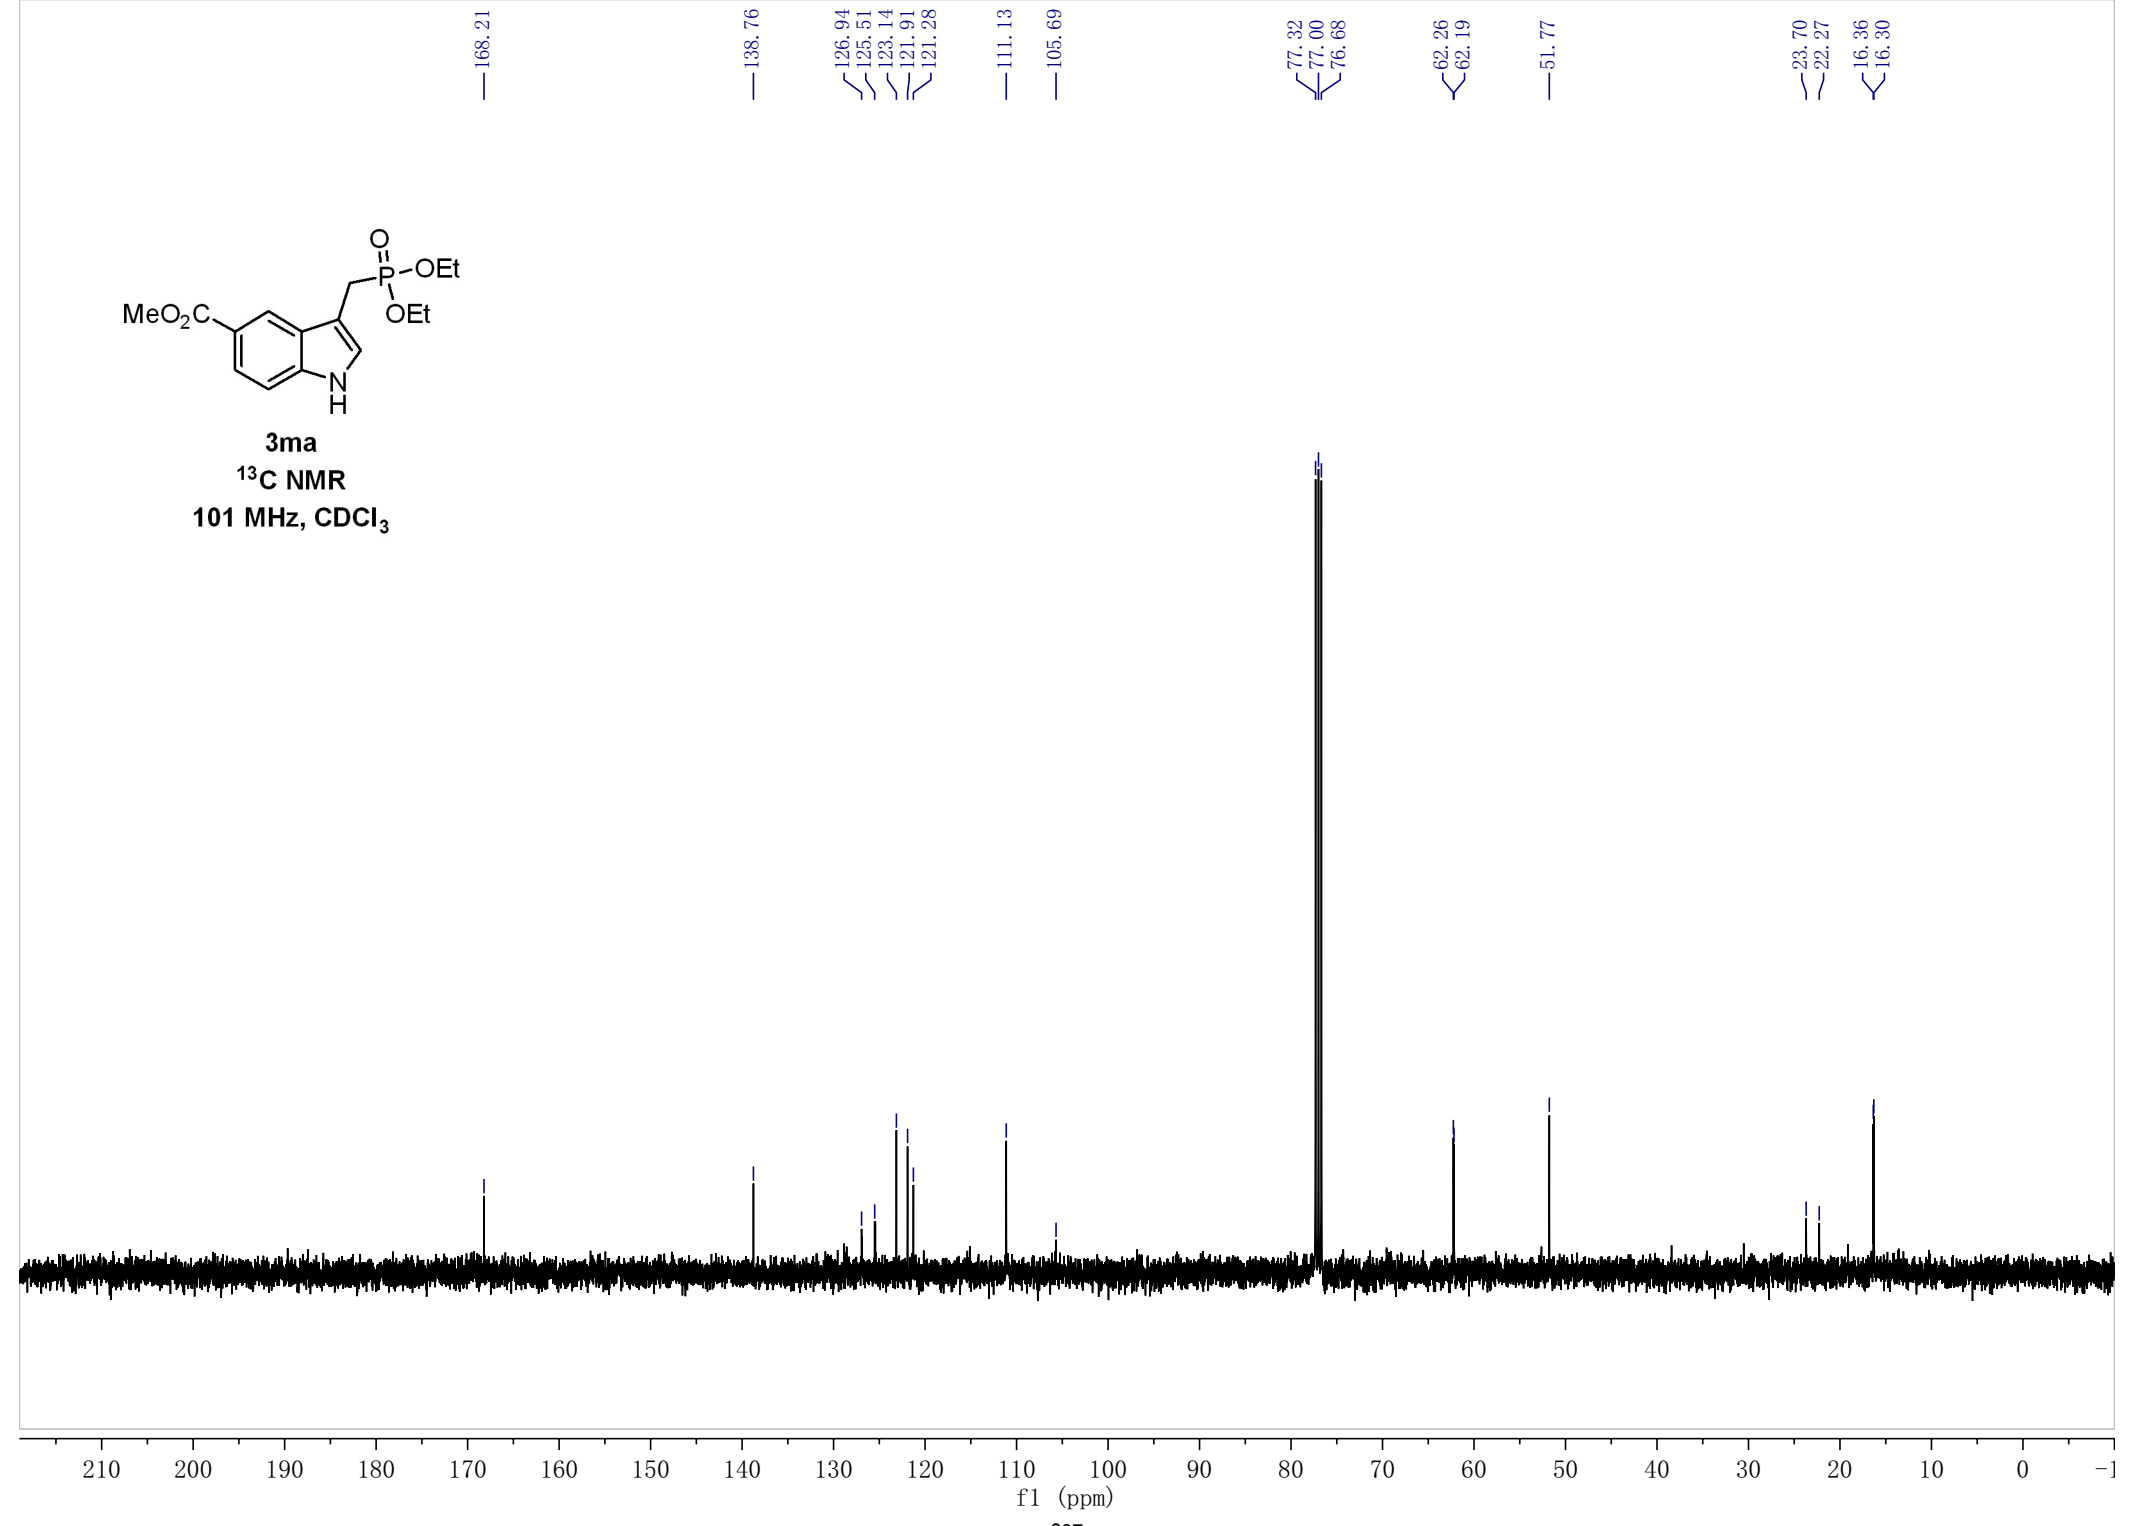

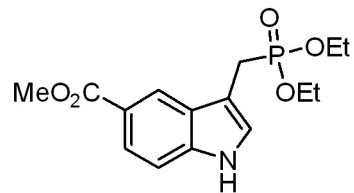

**3ma**  
**<sup>31</sup>P NMR**  
**162 MHz, CDCl<sub>3</sub>**

—27.69

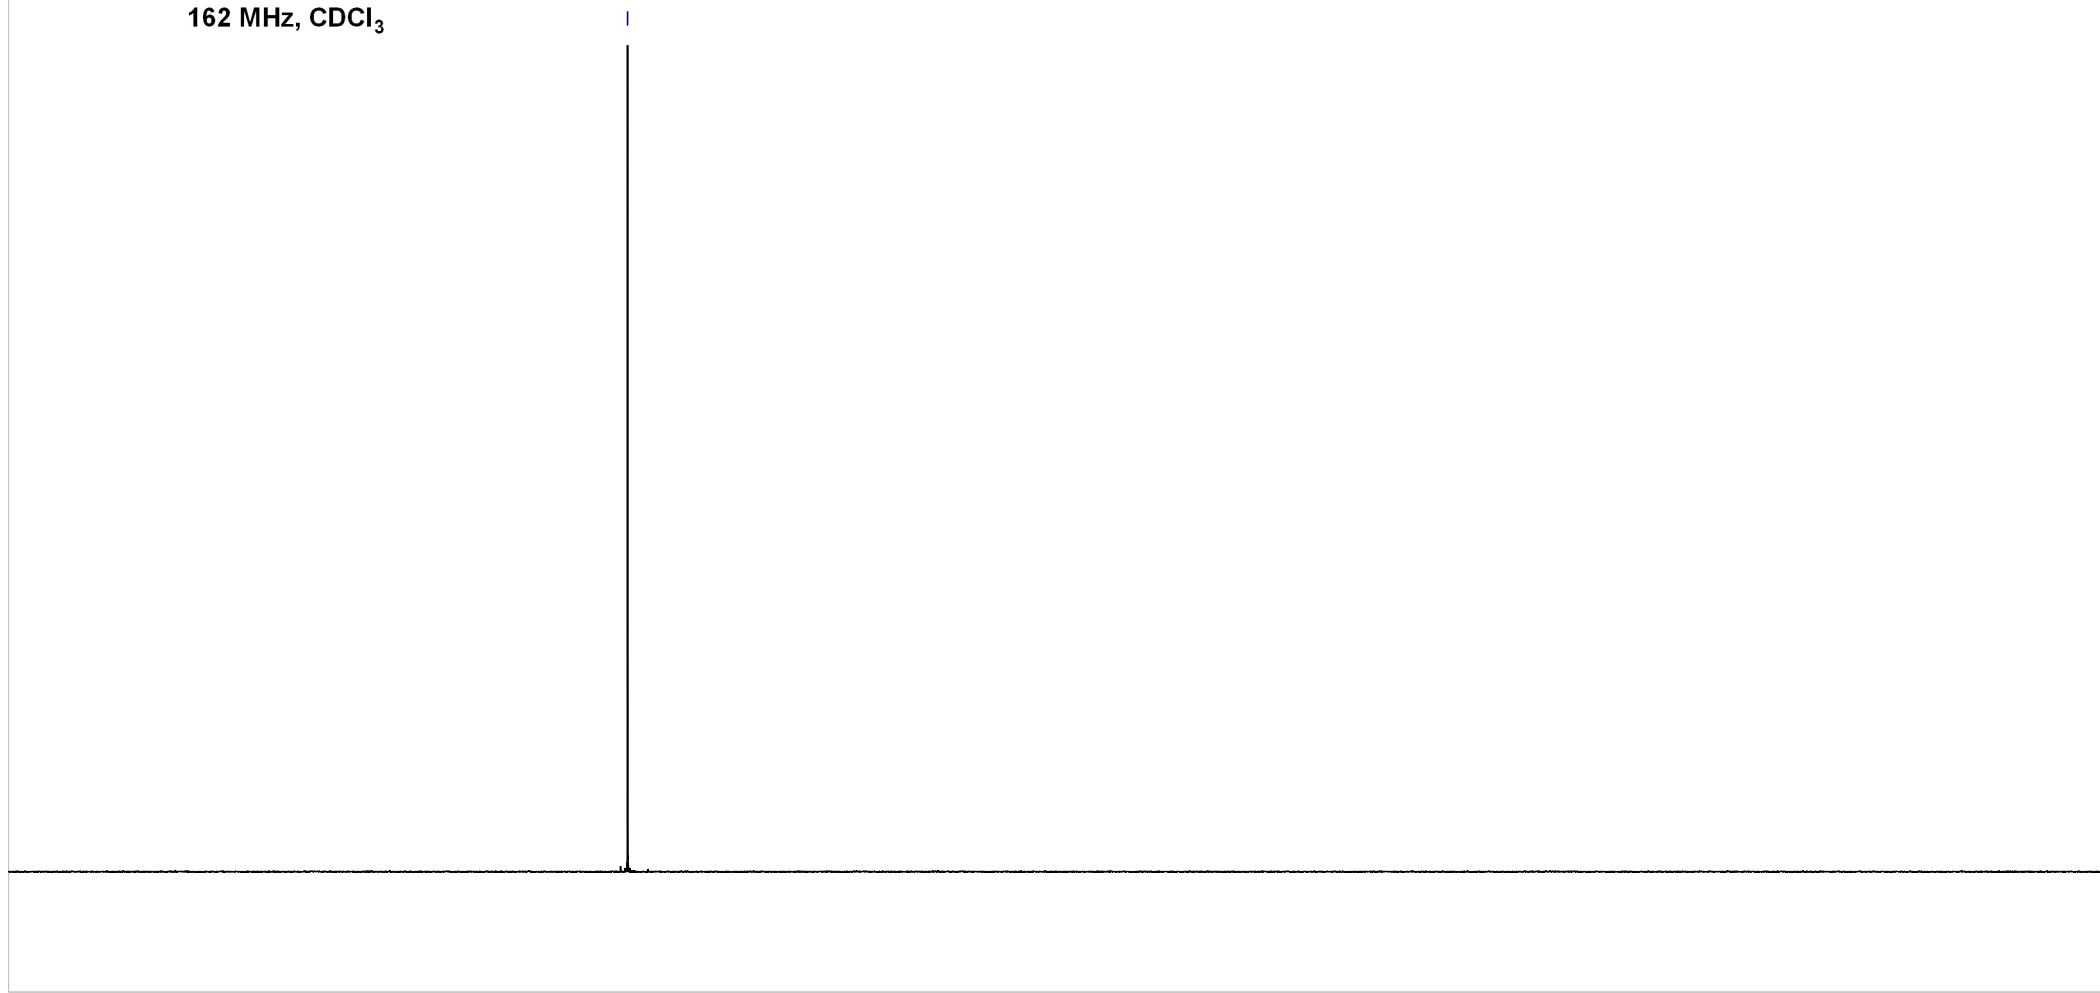

130 110 90 80 70 60 50 40 30 20 10 0 -10 -30 -50 -70 -90 -110 -130 -150 -170 -190 -210 -230

f1 (ppm)

S88

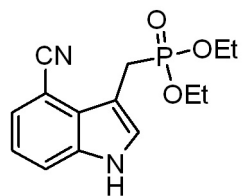

3na

<sup>1</sup>H NMR  
400 MHz, CDCl<sub>3</sub>

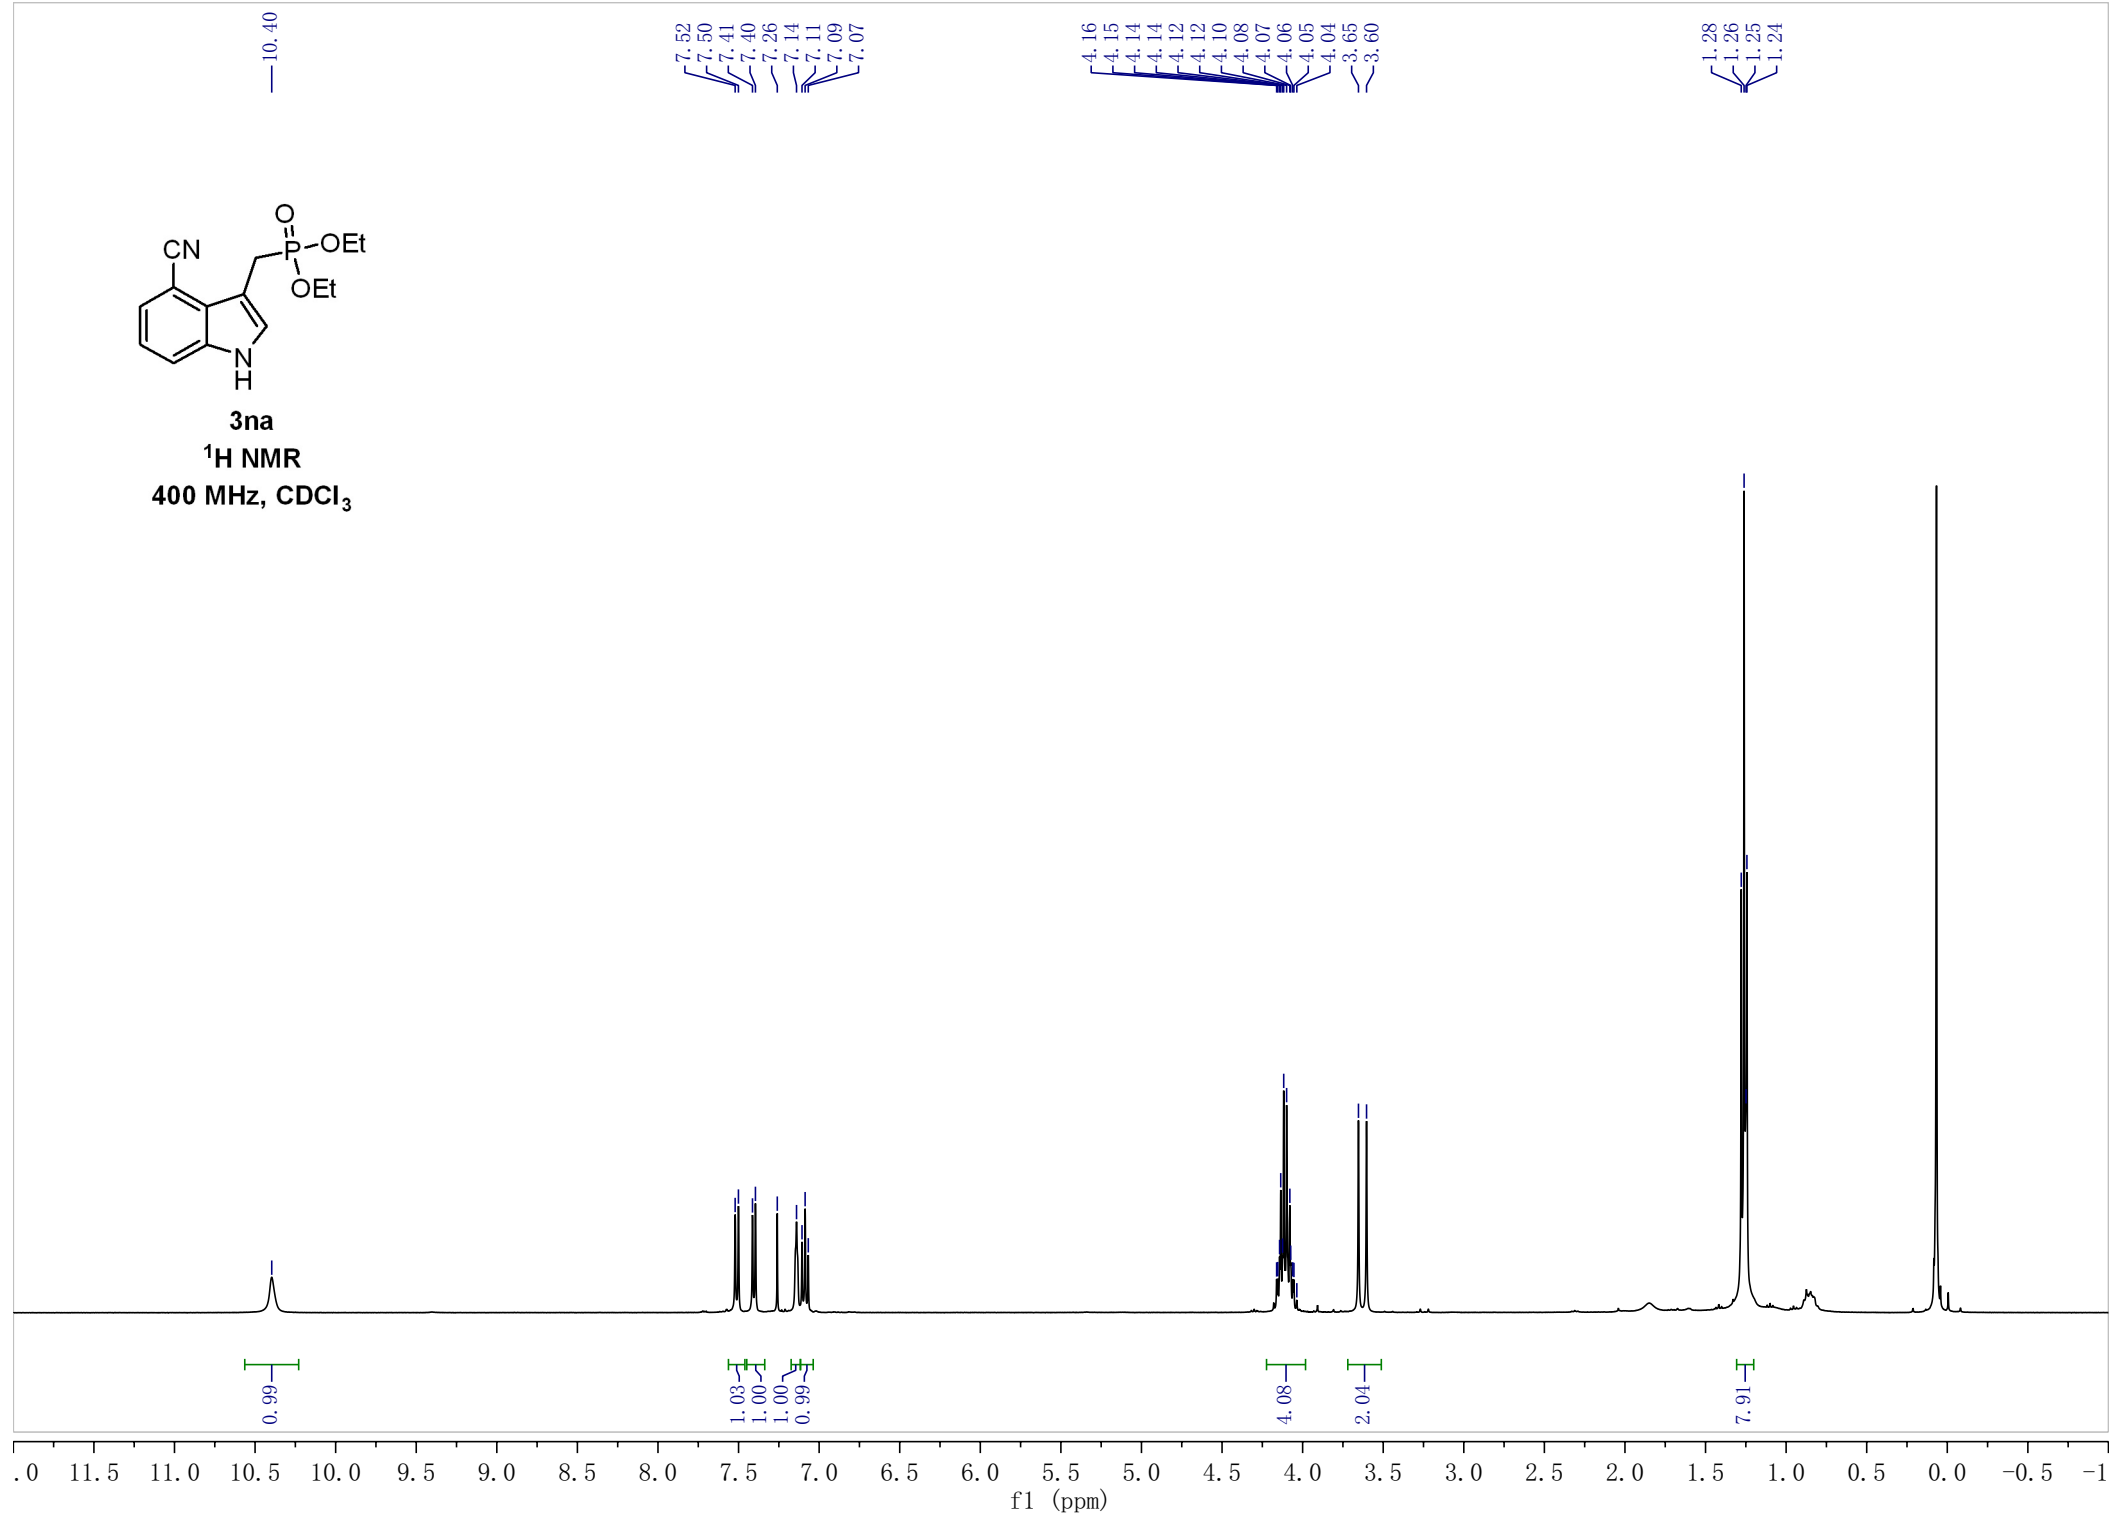

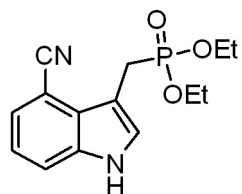

**3na**

<sup>13</sup>C NMR

101 MHz, CDCl<sub>3</sub>

136.30  
127.69  
127.63  
126.27  
126.21  
121.01  
119.41  
116.73  
103.84  
101.32  
77.32  
77.00  
76.68  
62.48  
62.41  
29.67  
22.63  
21.22  
16.35  
16.29

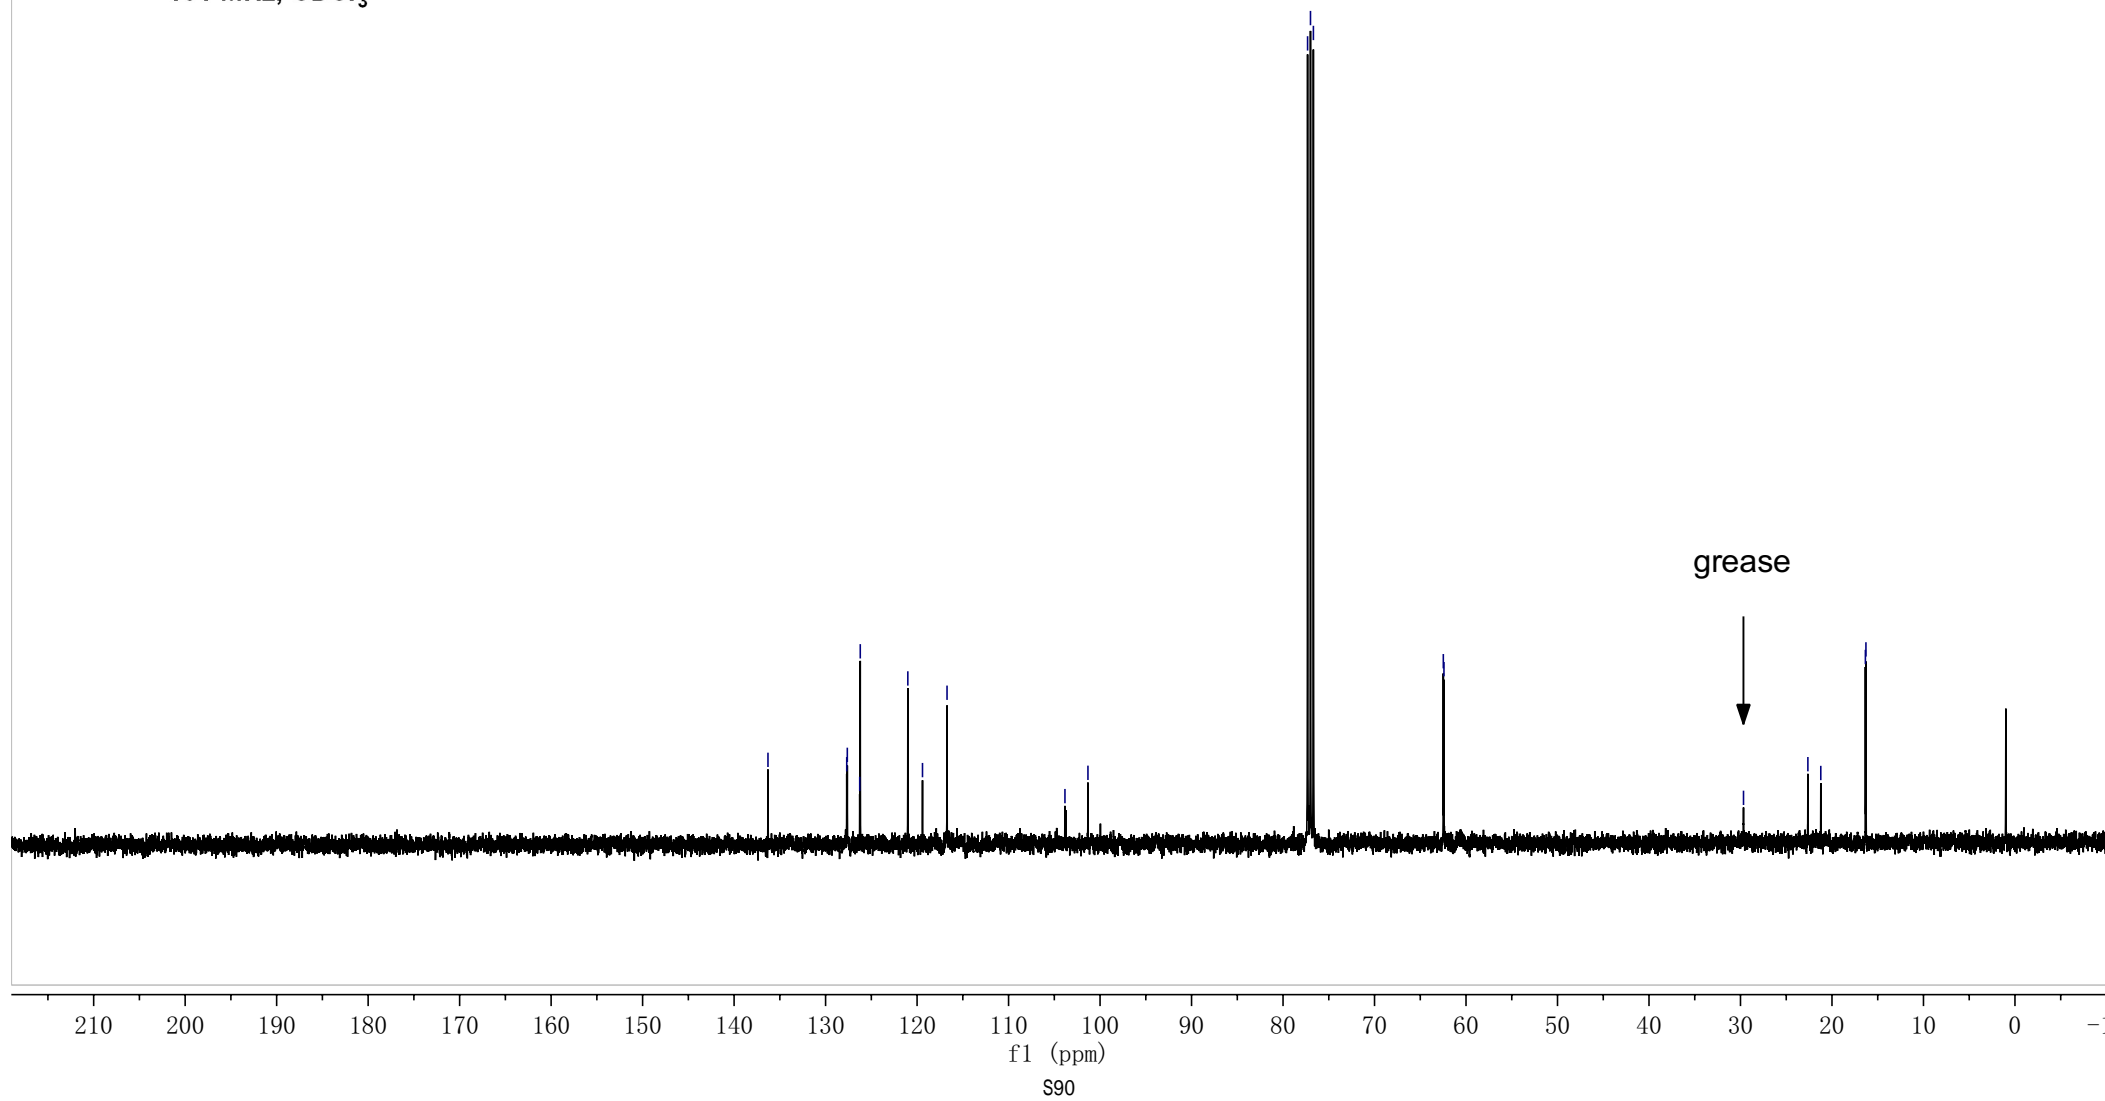

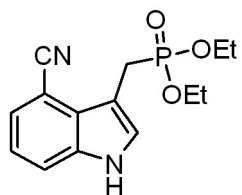

**3na**

**<sup>31</sup>P NMR**  
**162 MHz, CDCl<sub>3</sub>**

—27.53

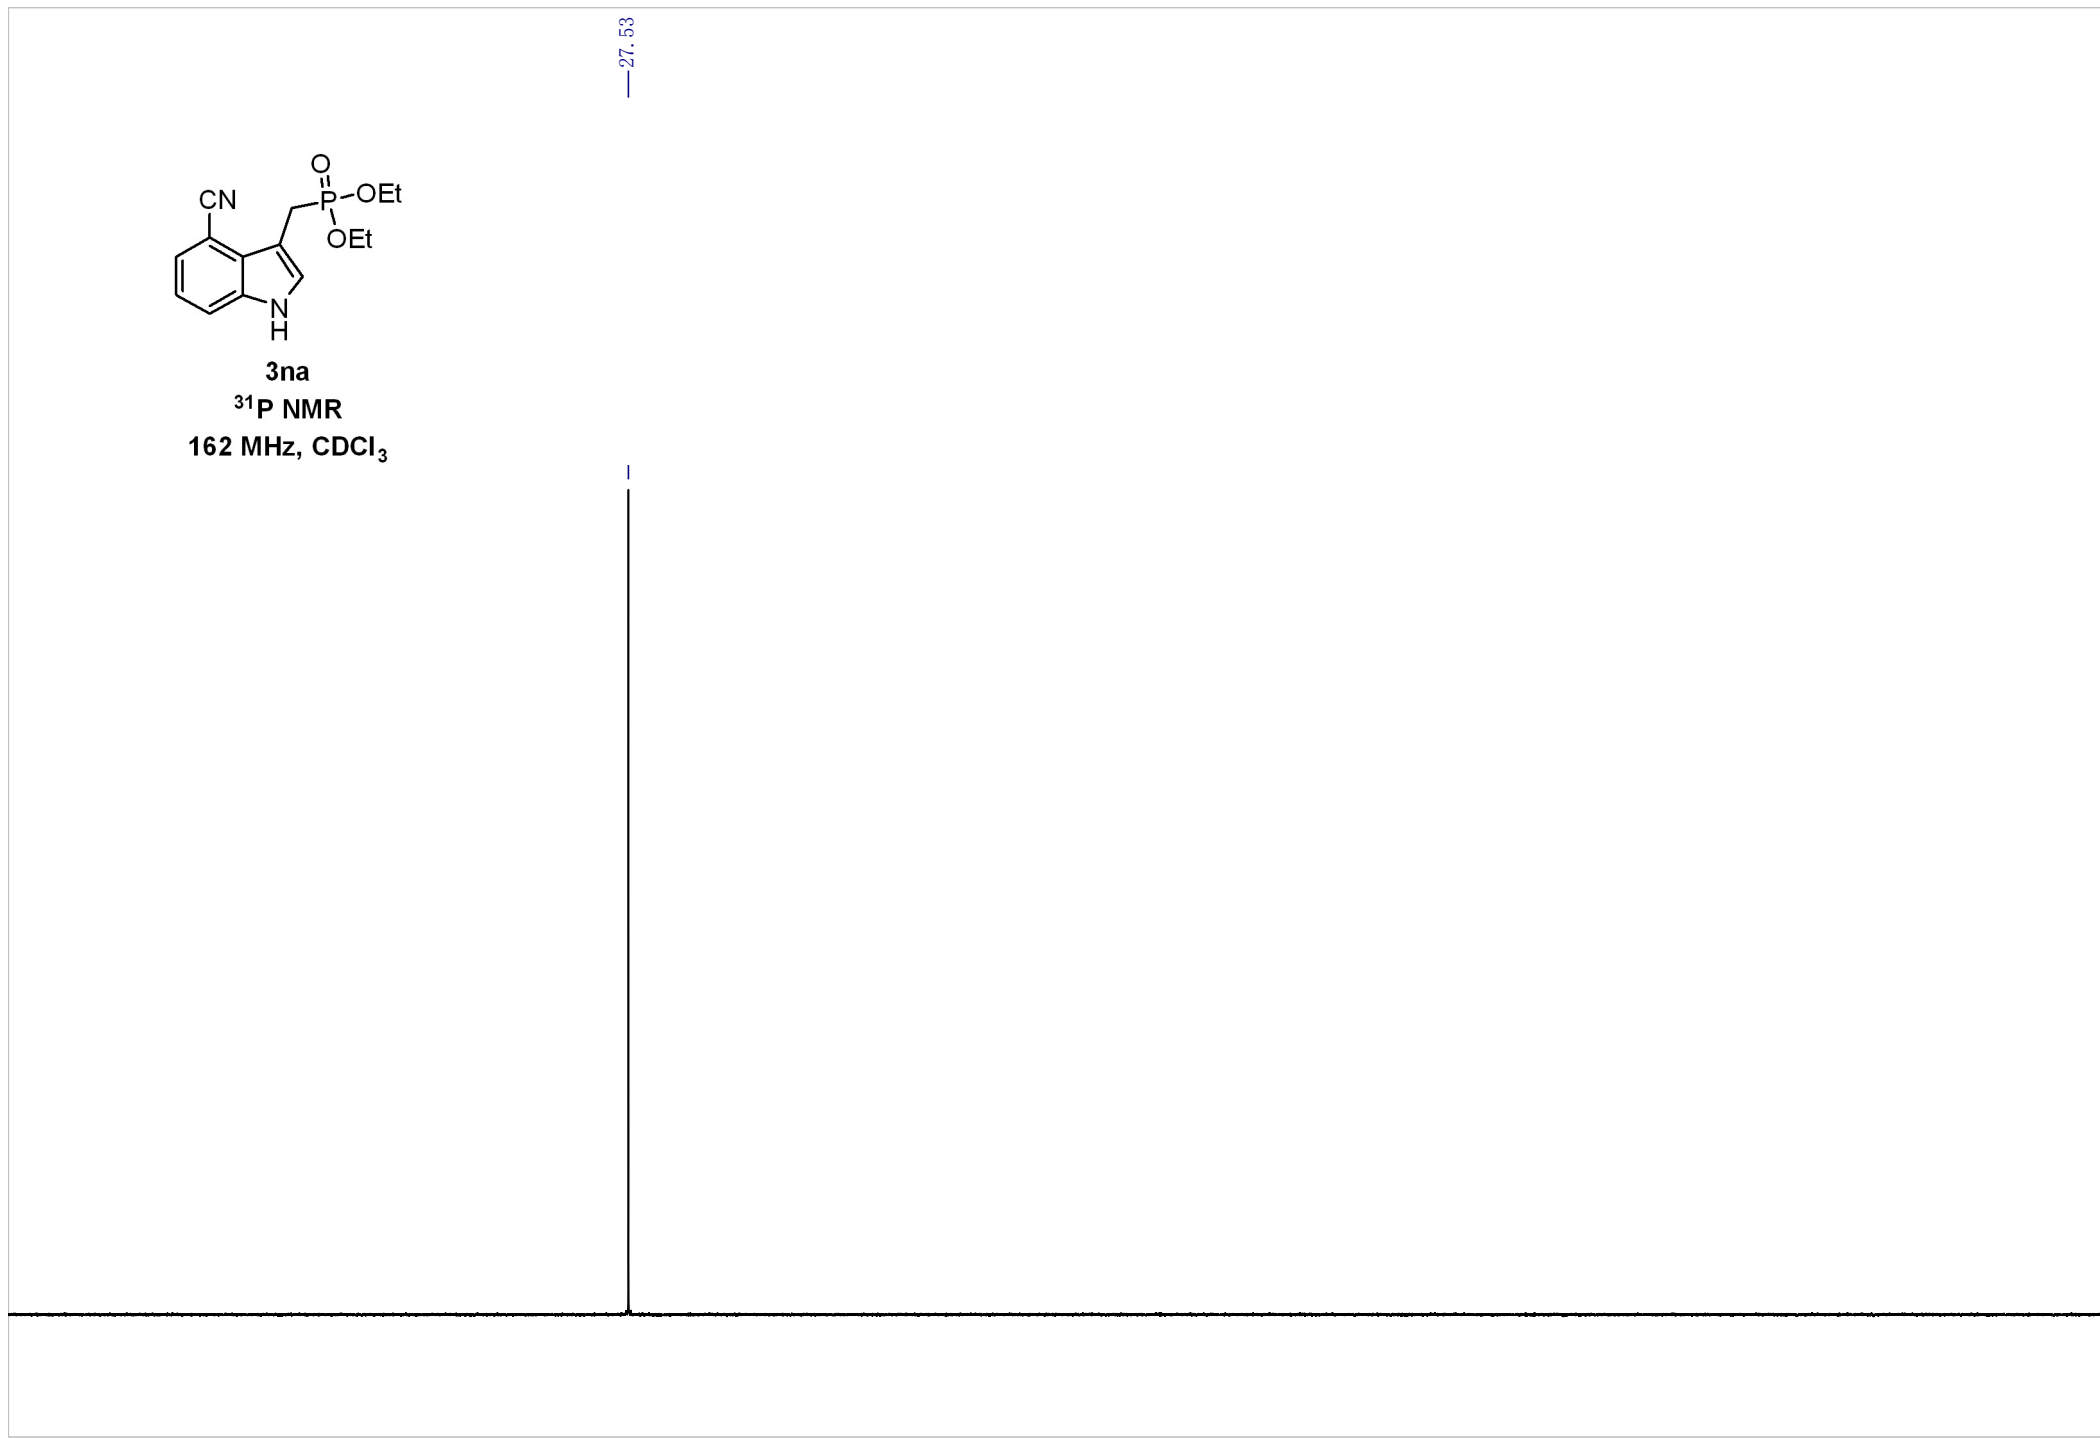

130 110 90 80 70 60 50 40 30 20 10 0 -10 -30 -50 -70 -90 -110 -130 -150 -170 -190 -210 -230

f1 (ppm)

S91

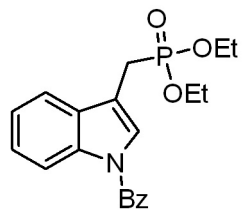

**3pa**

**<sup>1</sup>H NMR**

**400 MHz, CDCl<sub>3</sub>**

8.41  
8.39  
7.74  
7.72  
7.63  
7.62  
7.60  
7.58  
7.54  
7.52  
7.50  
7.42  
7.40  
7.38  
7.36  
7.34  
7.33  
7.31  
7.26

4.09  
4.07  
4.07  
4.06  
4.05  
4.04  
4.03  
4.02  
4.01  
4.00  
3.98  
3.98  
3.23  
3.18

1.24  
1.22  
1.20

1.00

2.14

2.20

2.17

3.33

4.19

2.17

6.42

.0 10.5 10.0 9.5 9.0 8.5 8.0 7.5 7.0 6.5 6.0 5.5 5.0 4.5 4.0 3.5 3.0 2.5 2.0 1.5 1.0 0.5 0.0 -0.5 -1

f1 (ppm)

S92



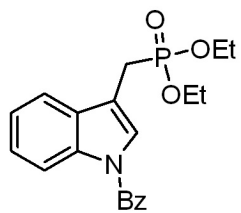

**3pa**

**$^{13}\text{C}$  NMR**  
**101 MHz,  $\text{CDCl}_3$**

168.41

136.04  
134.47  
131.89  
129.13  
128.56  
126.37  
126.28  
125.26  
123.81  
119.11  
116.43  
111.91  
111.81

77.32  
77.00  
76.68

62.20  
62.13

23.64  
22.21

16.37  
16.31

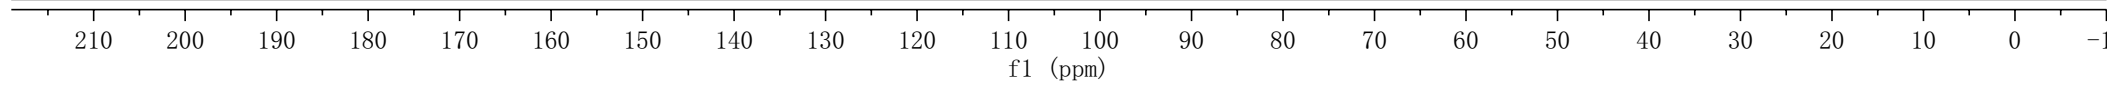

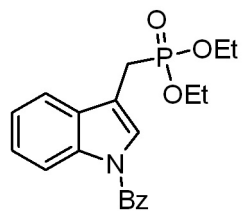

**3pa**

**<sup>31</sup>P NMR**

**162 MHz, CDCl<sub>3</sub>**

—26.03

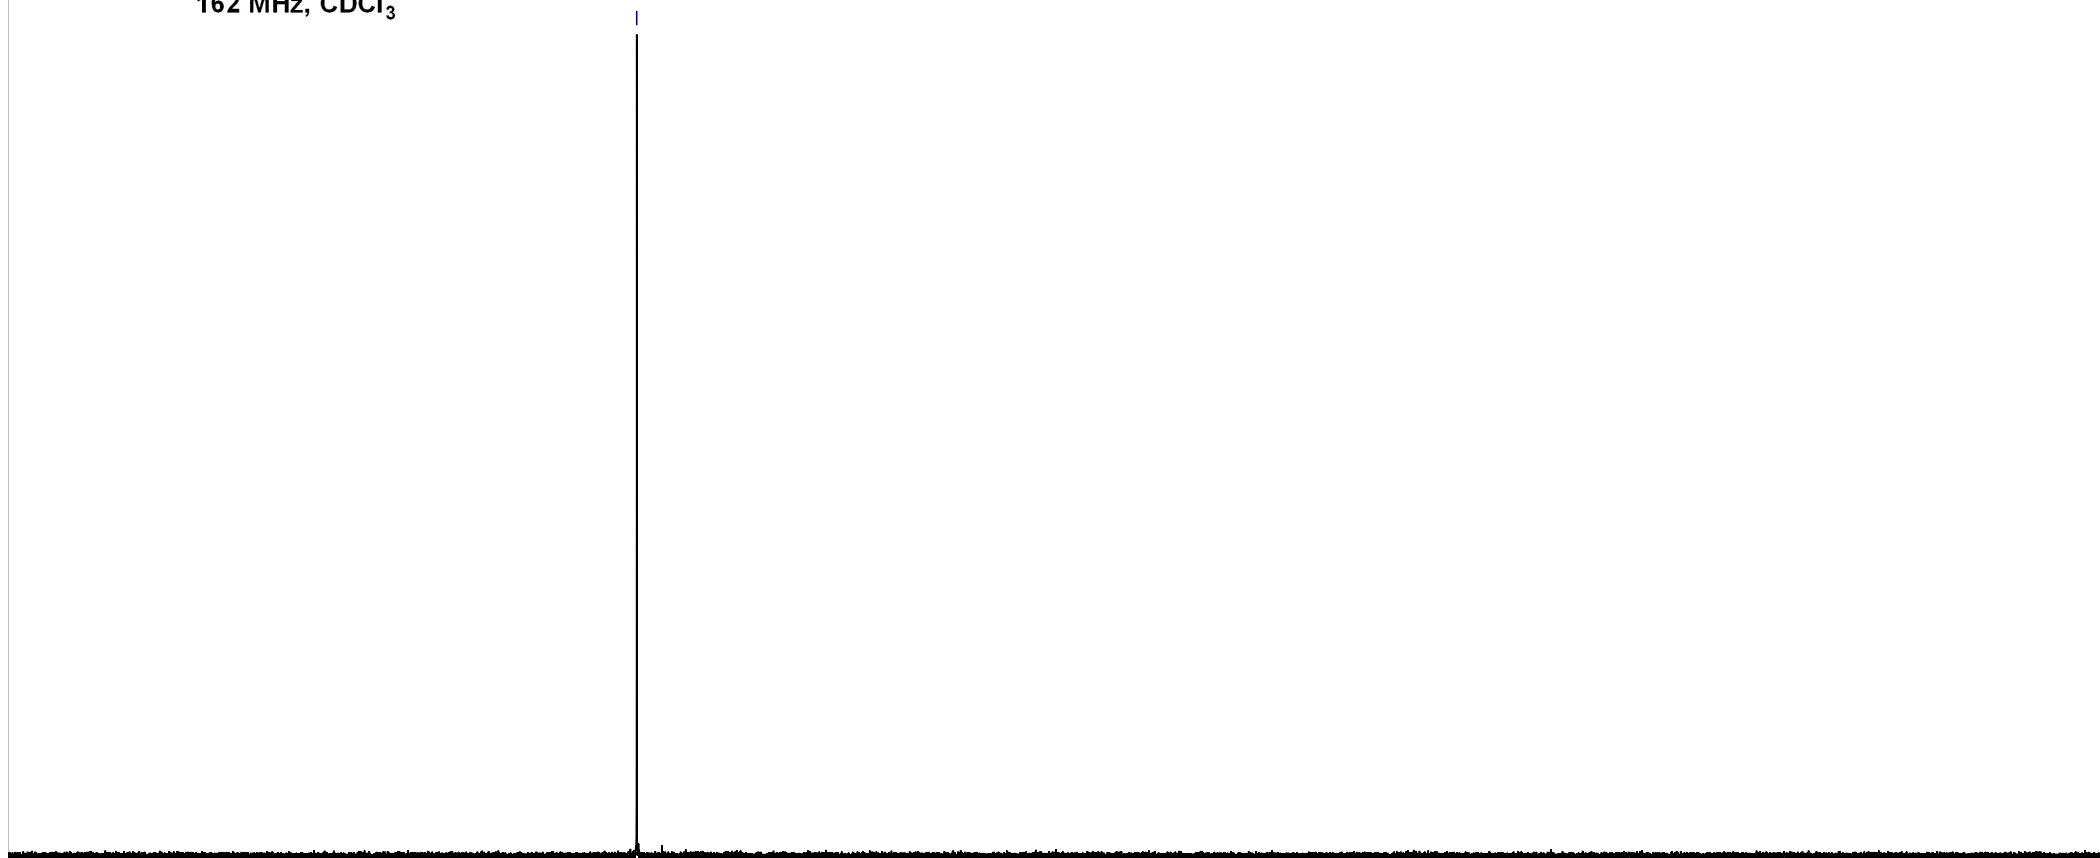

130 110 90 80 70 60 50 40 30 20 10 0 -10 -30 -50 -70 -90 -110 -130 -150 -170 -190 -210 -230

f1 (ppm)

S94

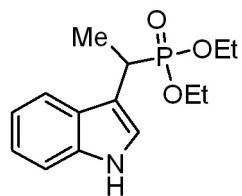

3ra

<sup>1</sup>H NMR  
400 MHz, CDCl<sub>3</sub>

9.21  
9.15  
9.12

7.67  
7.65  
7.36  
7.34  
7.26  
7.18  
7.16  
7.14  
7.12  
7.12  
7.10  
7.08  
7.05

4.16  
4.15  
4.13  
4.12  
4.10  
4.08  
4.07  
4.06  
4.06  
3.92  
3.91  
3.90  
3.89  
3.88  
3.87  
3.86  
3.86  
3.71  
3.69  
3.69  
3.68  
3.67  
3.66  
3.65  
3.64  
3.63  
3.57  
3.56  
3.54  
3.52  
3.50  
3.48  
3.46  
3.46  
1.64  
1.62  
1.60  
1.34  
1.32  
1.30  
1.06  
1.04  
1.03

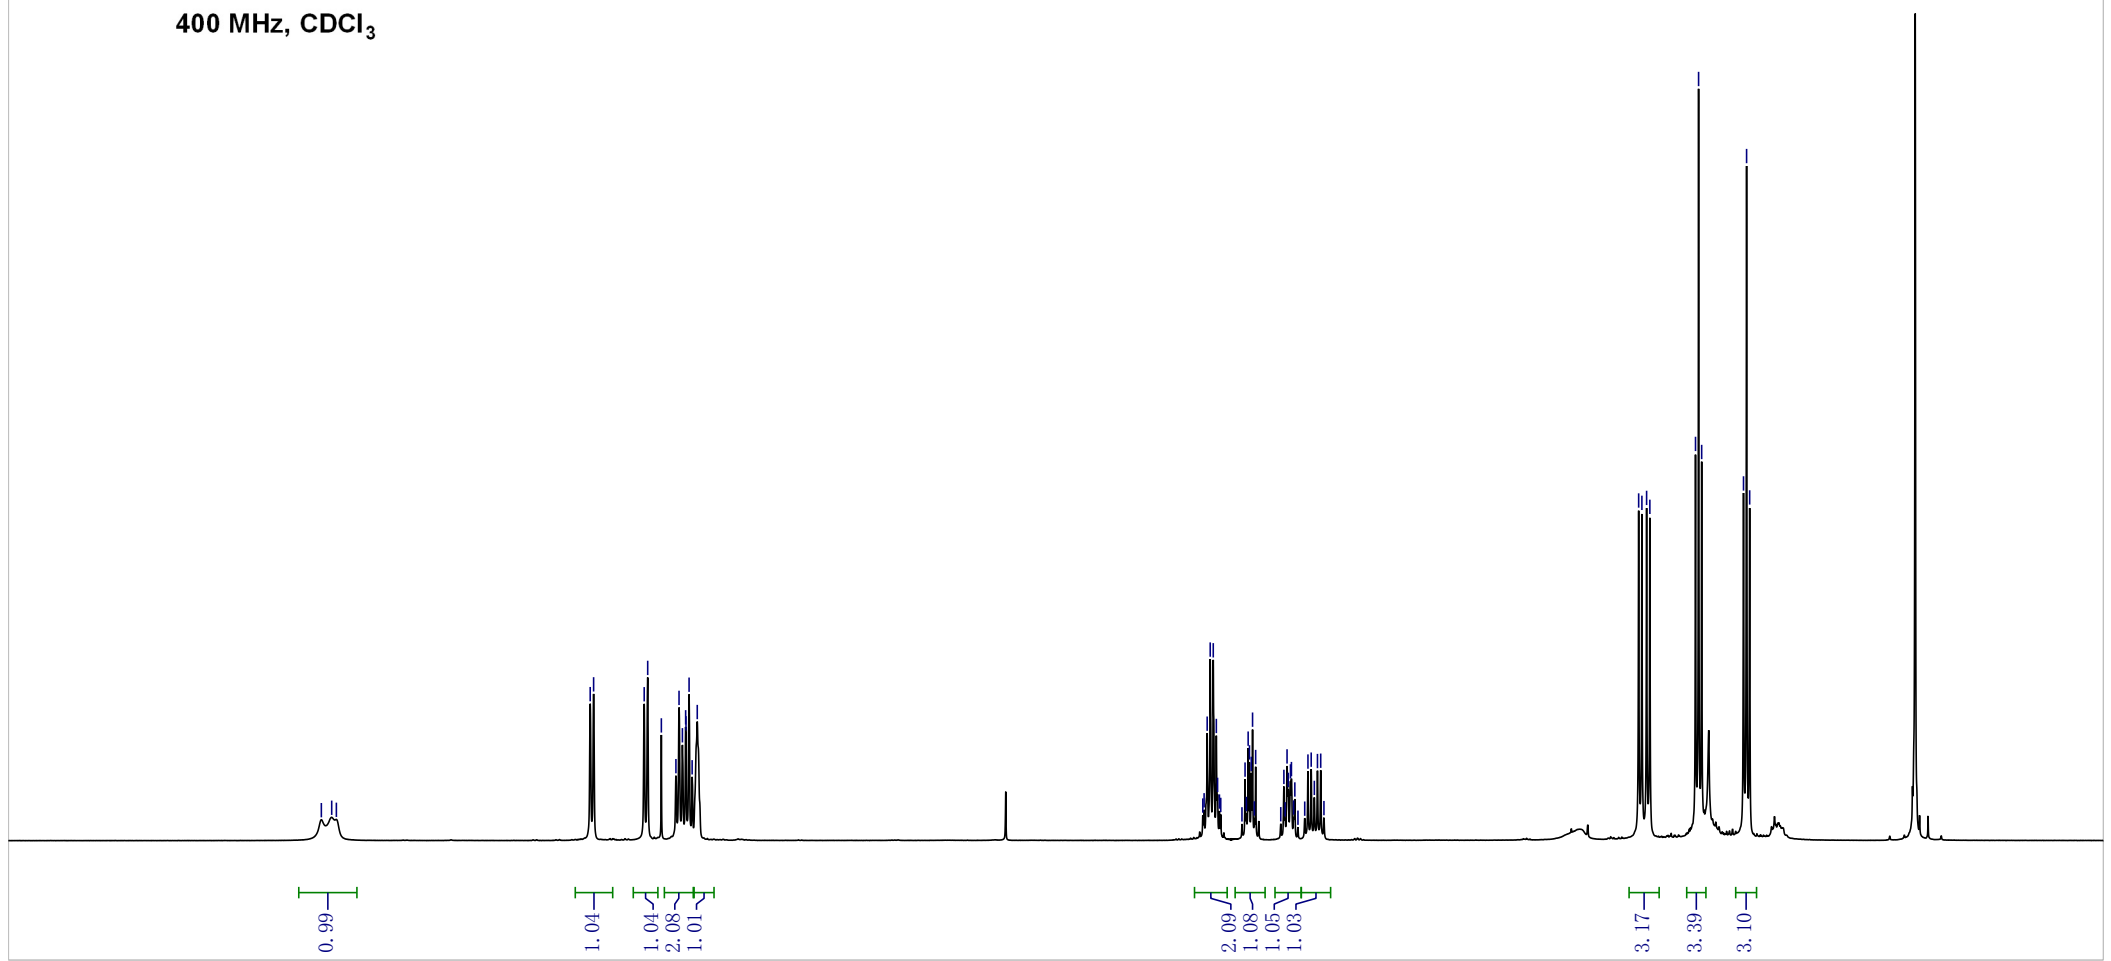

0.99

1.04

1.04

2.08

1.01

2.09

1.08

1.05

1.03

3.17

3.39

3.10

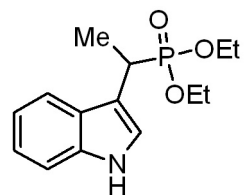

**3ra**

<sup>13</sup>C NMR

101 MHz, CDCl<sub>3</sub>

136.02  
126.87  
126.81  
123.21  
121.75  
119.13  
118.99  
111.37  
77.32  
77.00  
76.68  
62.49  
62.42  
61.80  
61.72  
29.76  
28.34  
16.48  
16.42  
16.27  
16.22  
15.79  
15.76

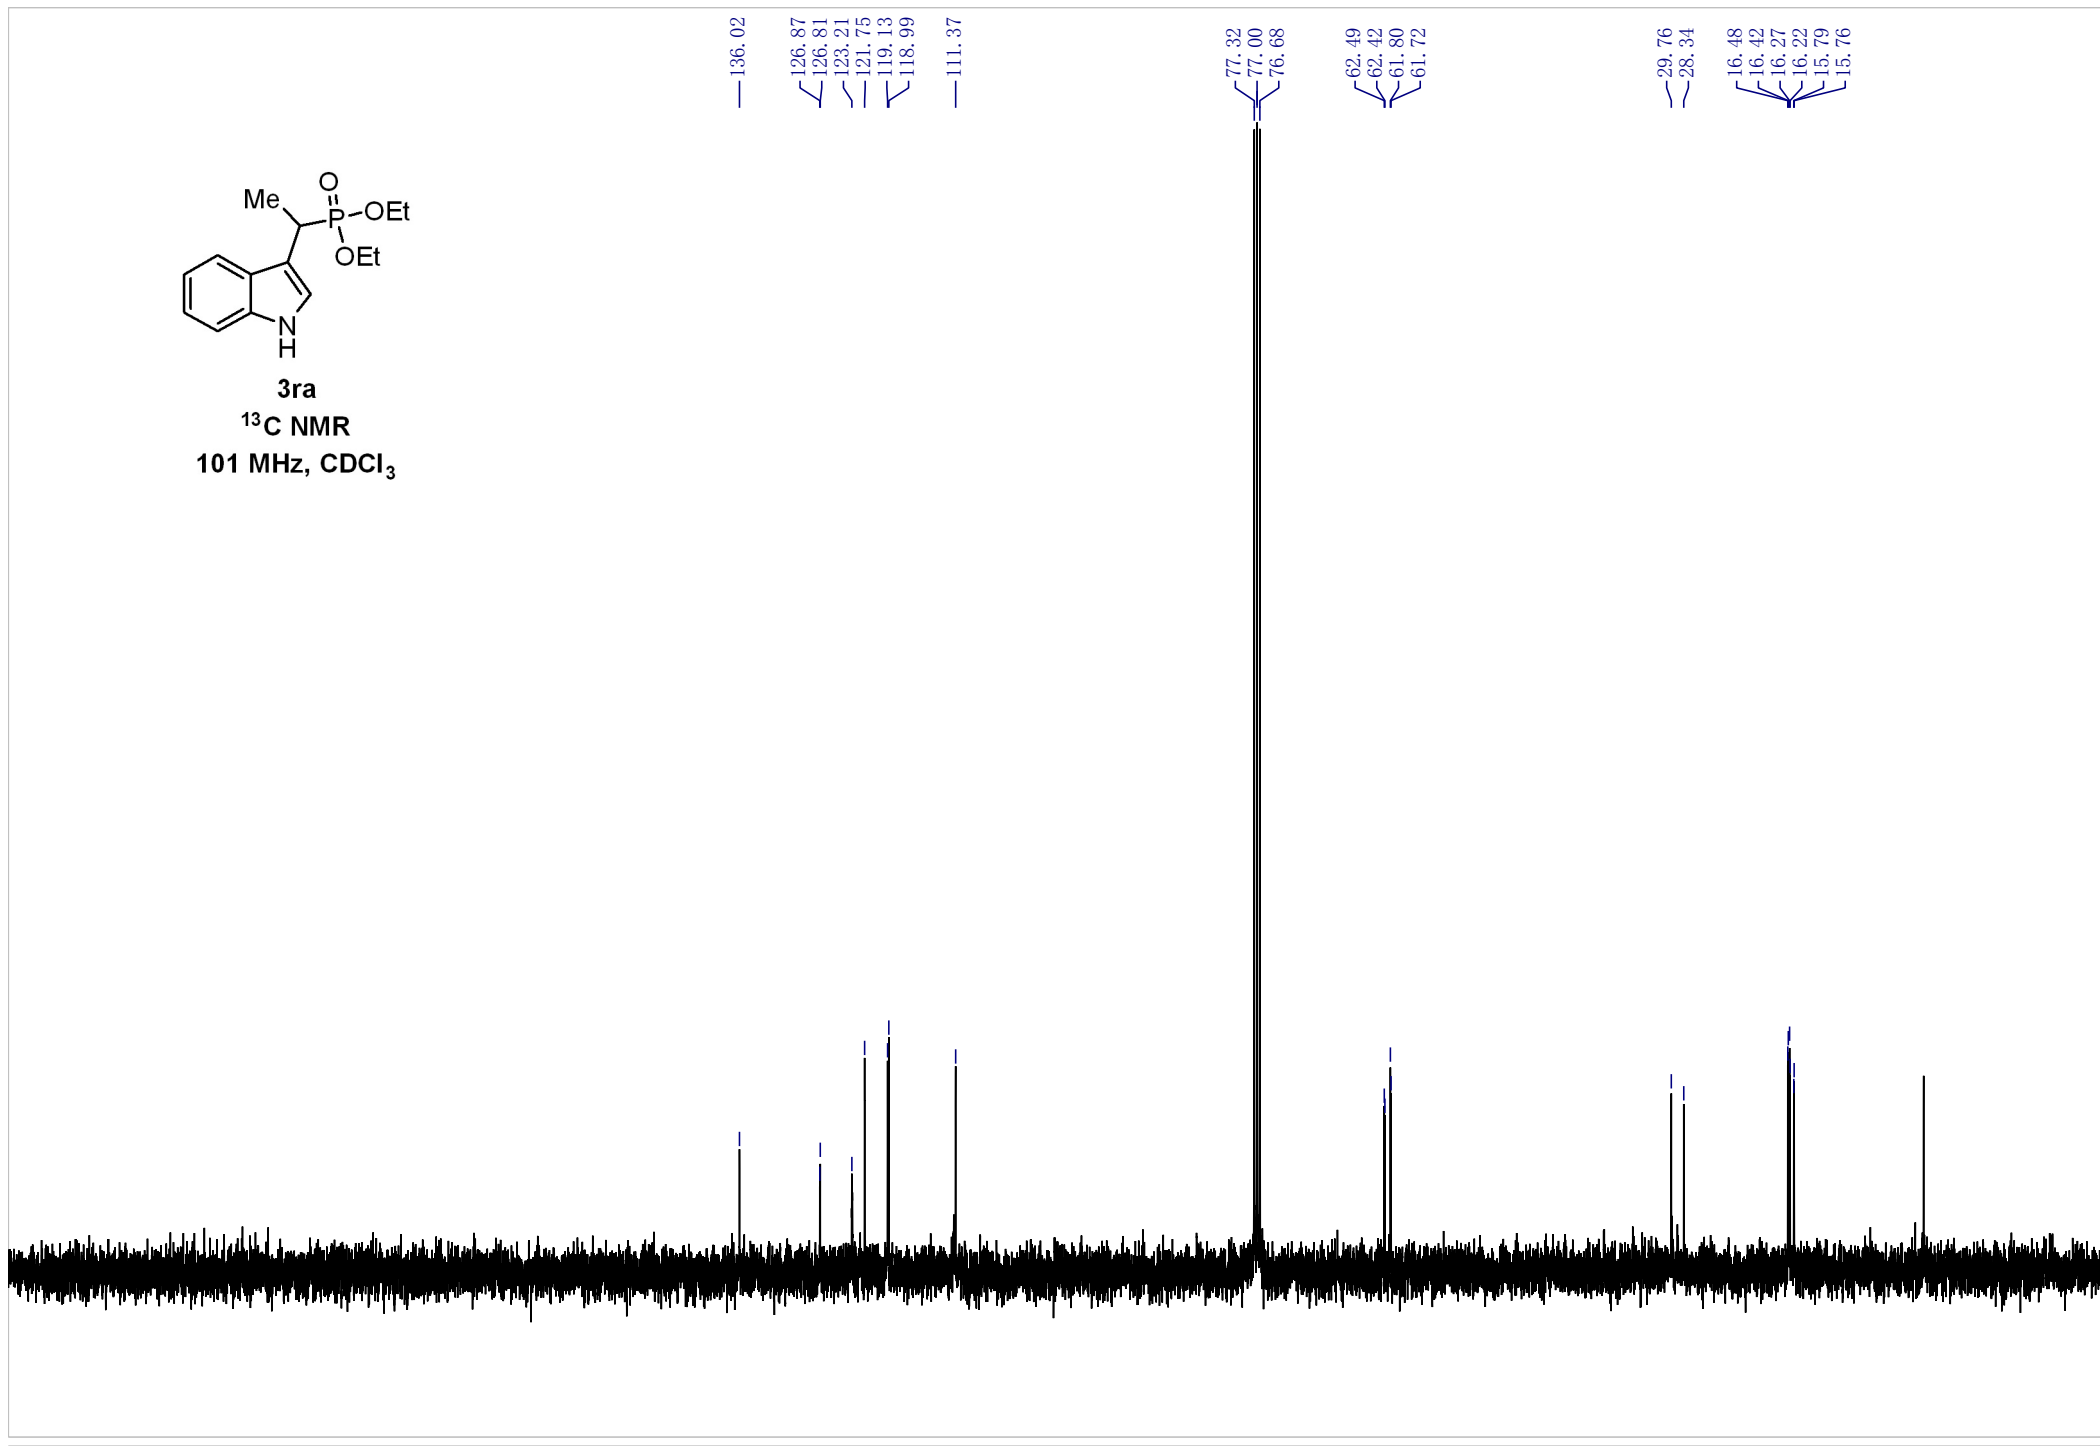

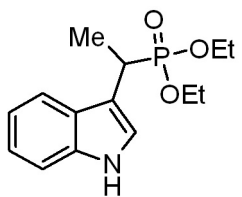

3ra

<sup>31</sup>P NMR  
162 MHz, CDCl<sub>3</sub>

—31.26

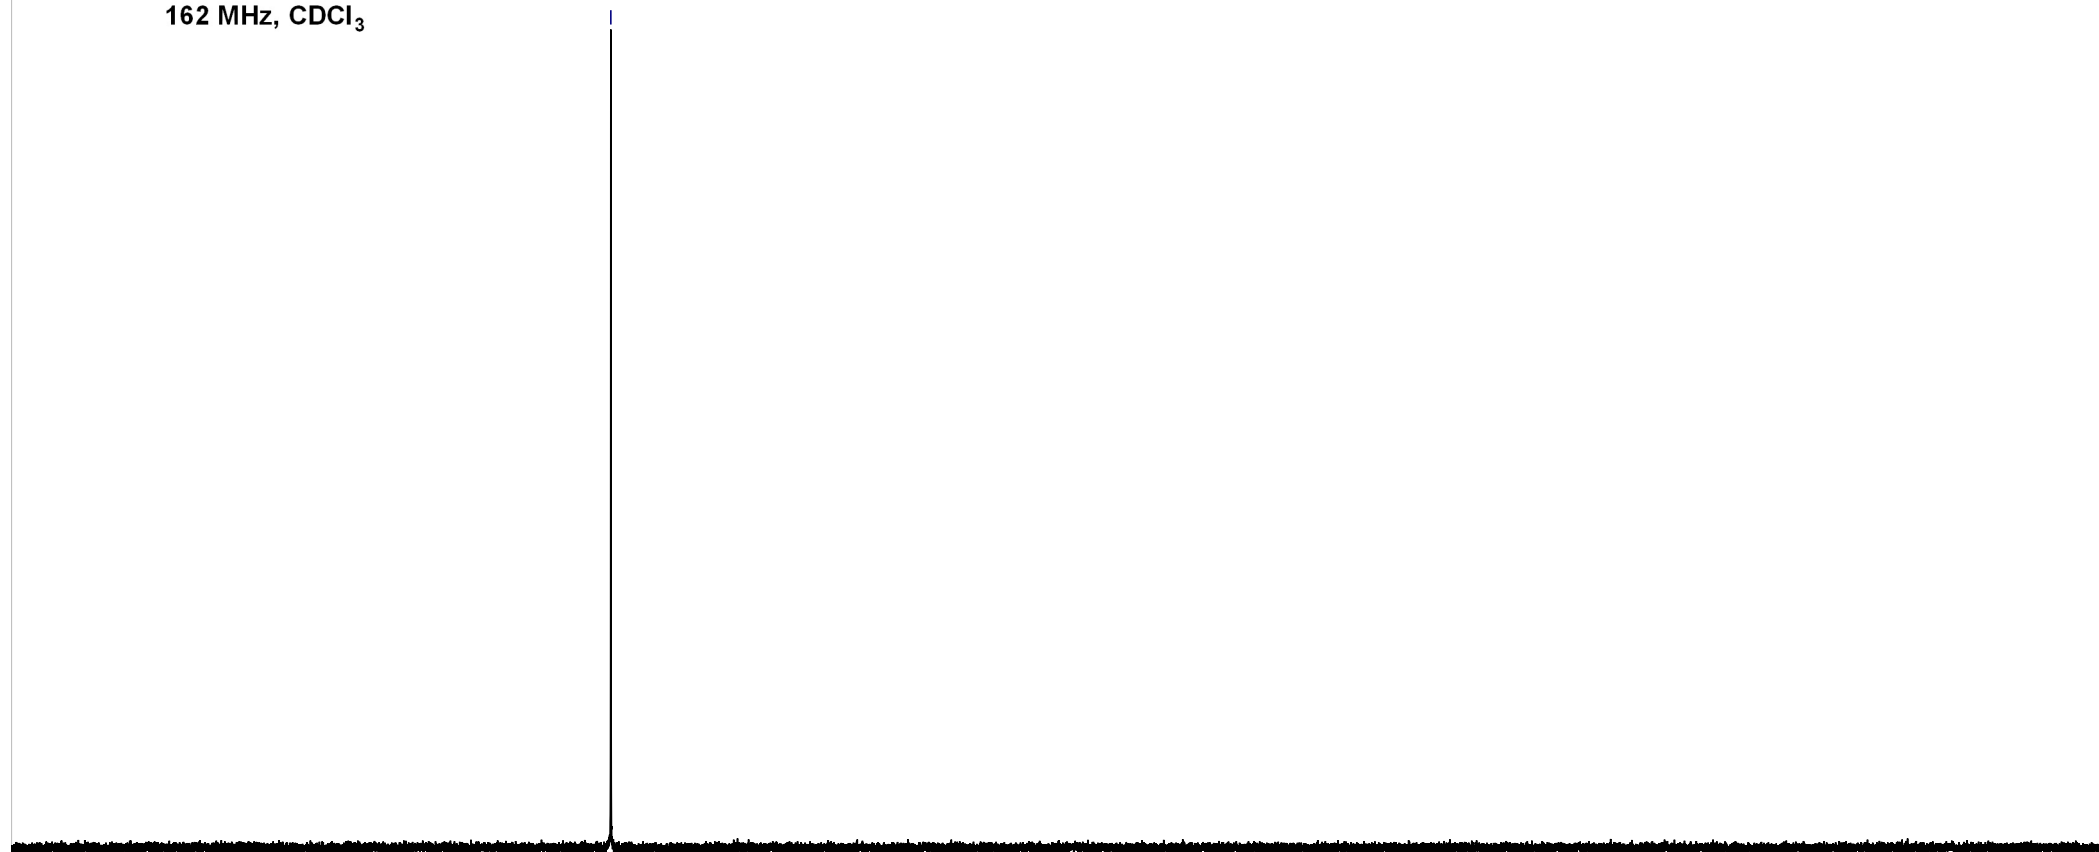

130 110 90 80 70 60 50 40 30 20 10 0 -10 -30 -50 -70 -90 -110 -130 -150 -170 -190 -210 -230

f1 (ppm)

S97

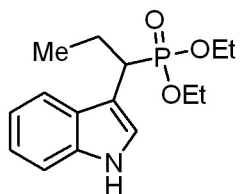

**3sa**

**<sup>1</sup>H NMR**  
**400 MHz, CDCl<sub>3</sub>**

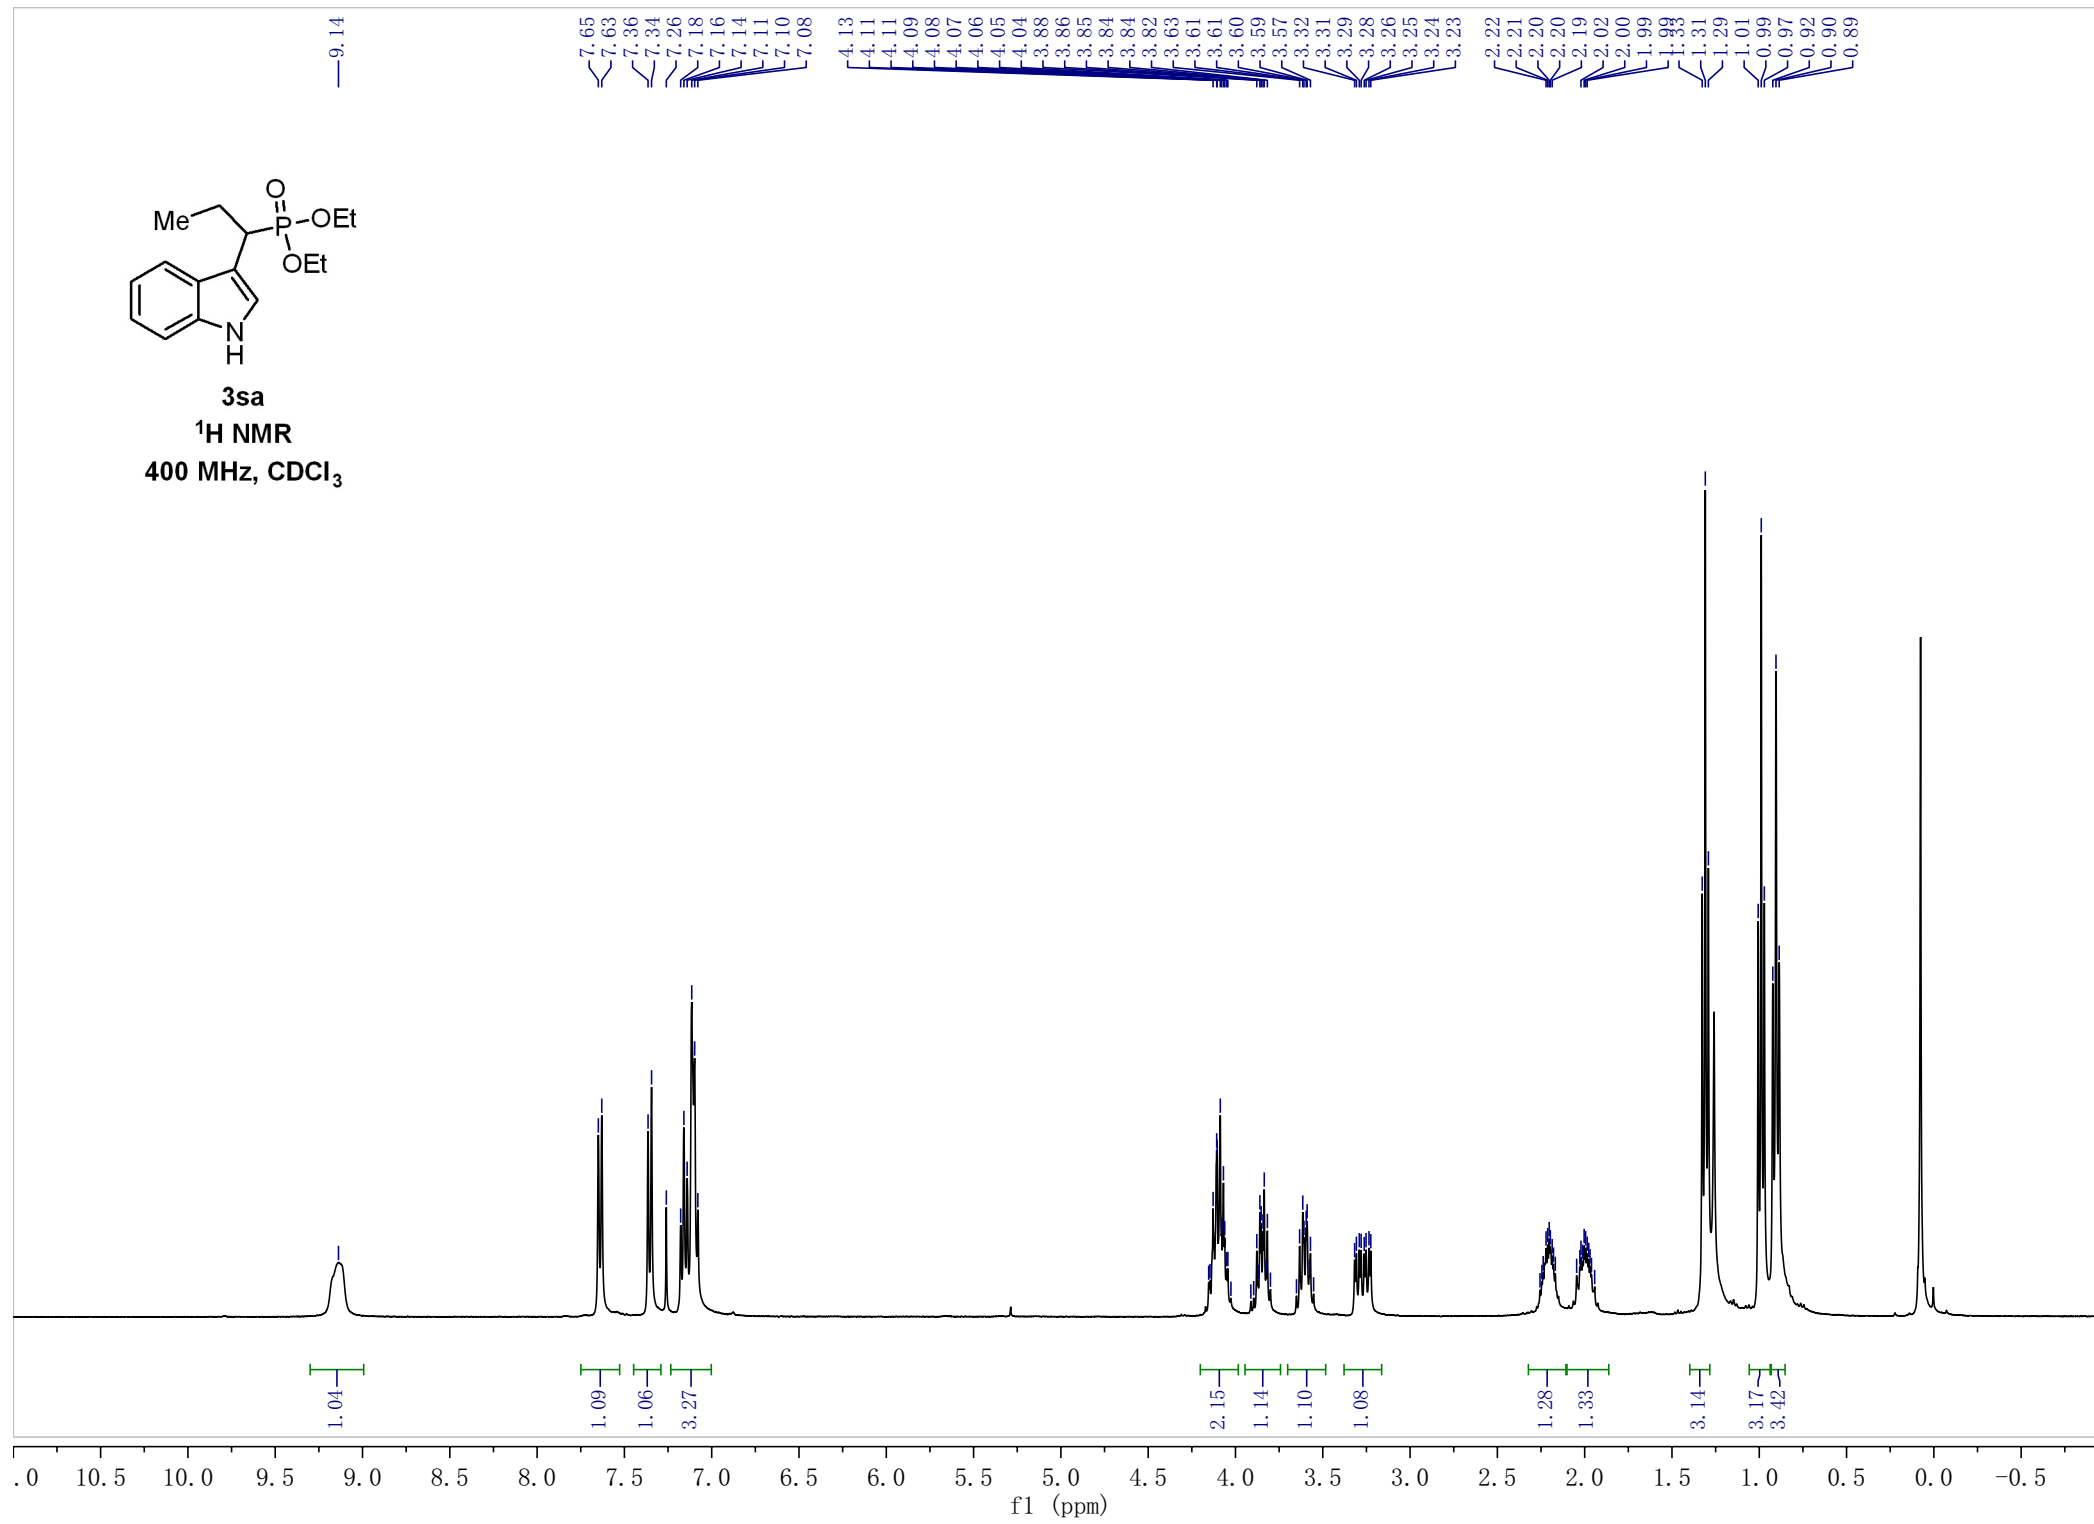

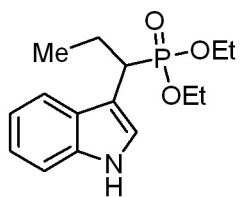

**3sa**

**<sup>13</sup>C NMR**  
**101 MHz, CDCl<sub>3</sub>**

136.10  
127.76  
127.70  
123.58  
123.51  
121.69  
119.13  
118.91  
111.34  
109.46  
77.32  
77.00  
76.68  
62.47  
62.40  
61.64  
61.57  
37.29  
35.89  
29.66  
23.53  
16.46  
16.40  
16.22  
16.17  
12.65  
12.50

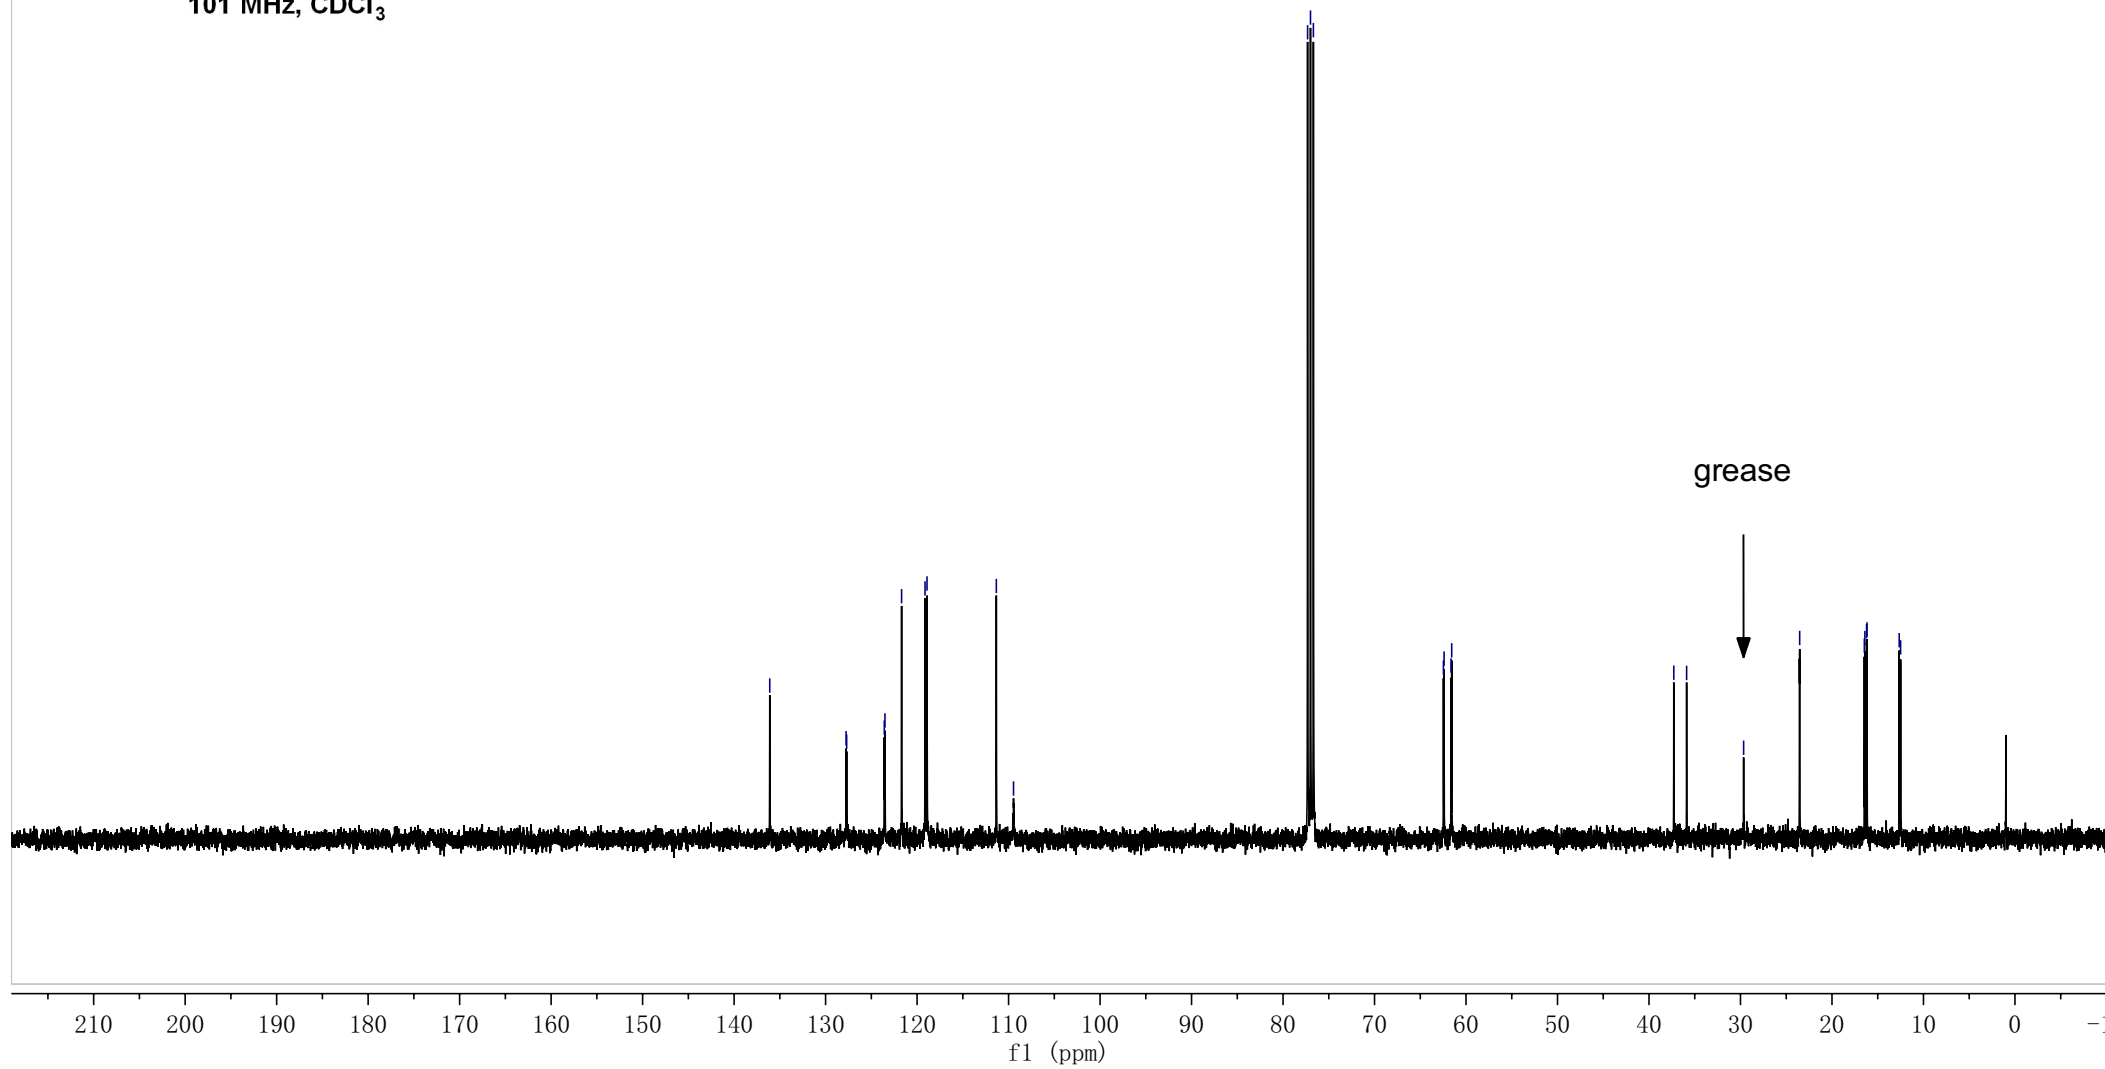

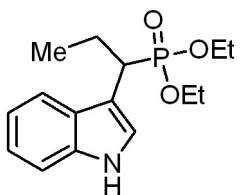

**3sa**

**<sup>31</sup>P NMR**

**162 MHz, CDCl<sub>3</sub>**

—30.28

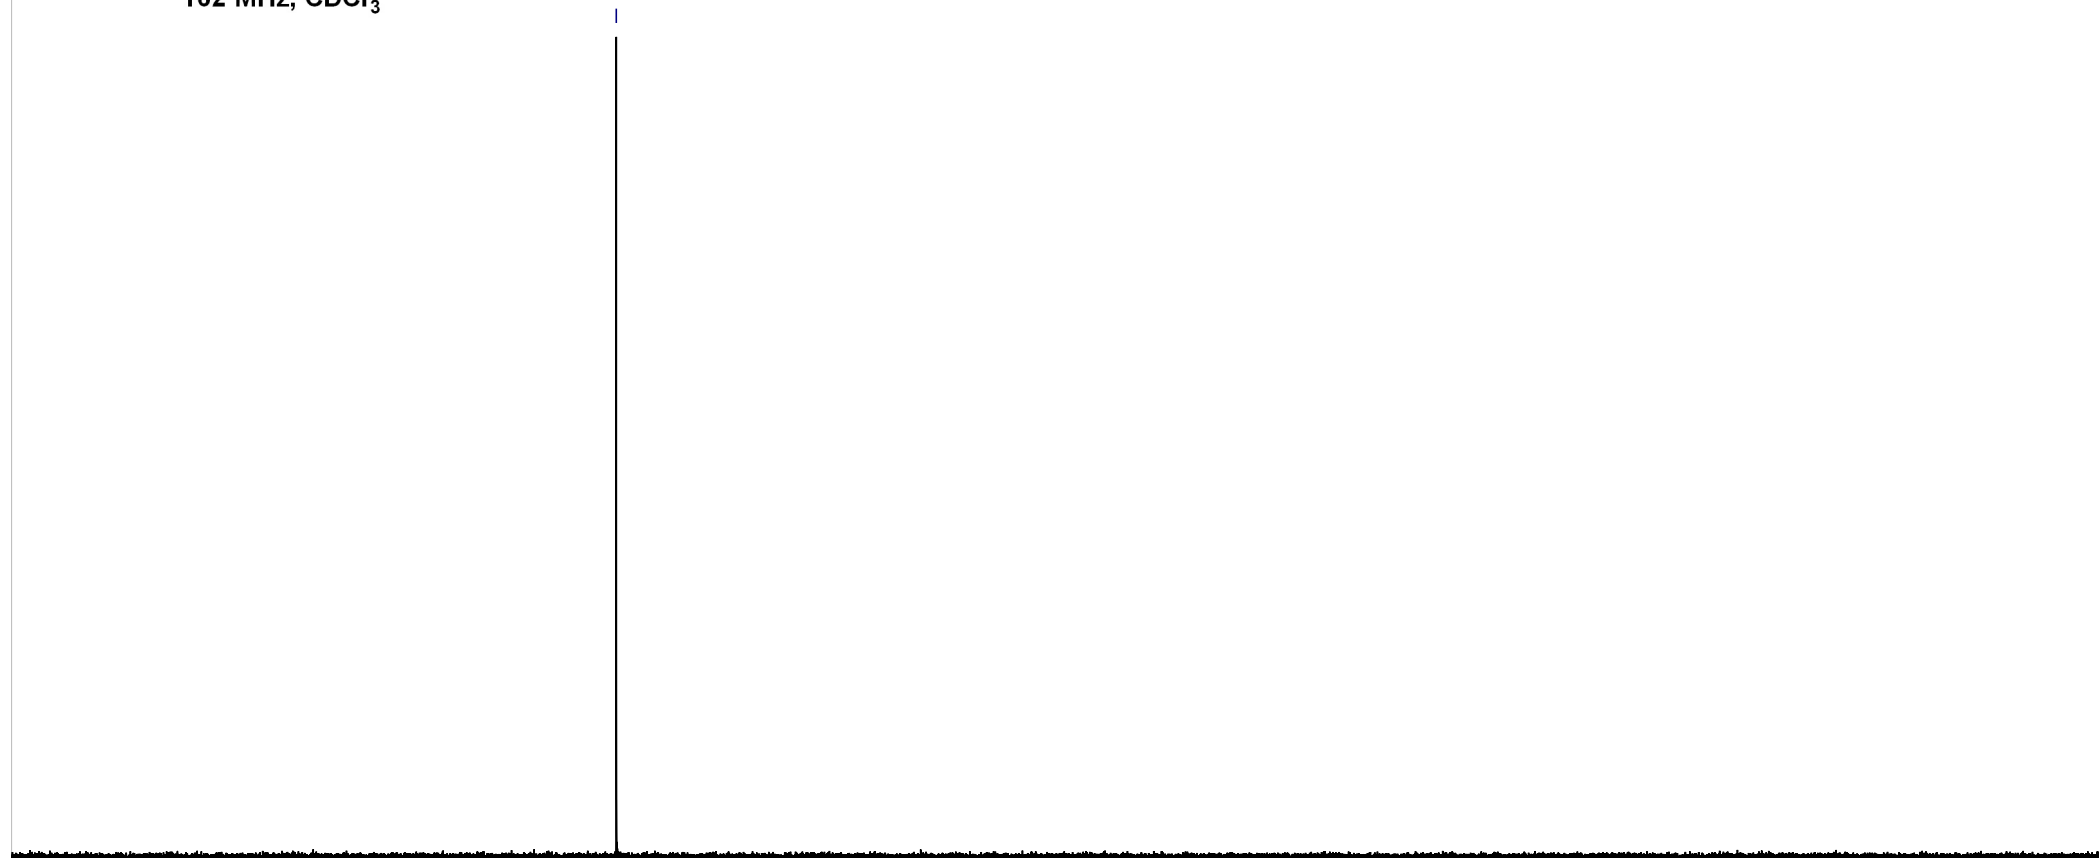

130 110 90 80 70 60 50 40 30 20 10 0 -10 -30 -50 -70 -90 -110 -130 -150 -170 -190 -210 -230

f1 (ppm)

S100



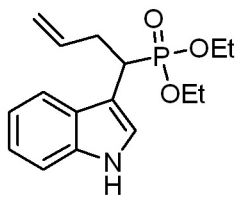

**3ta**

**<sup>1</sup>H NMR**  
**400 MHz, CDCl<sub>3</sub>**

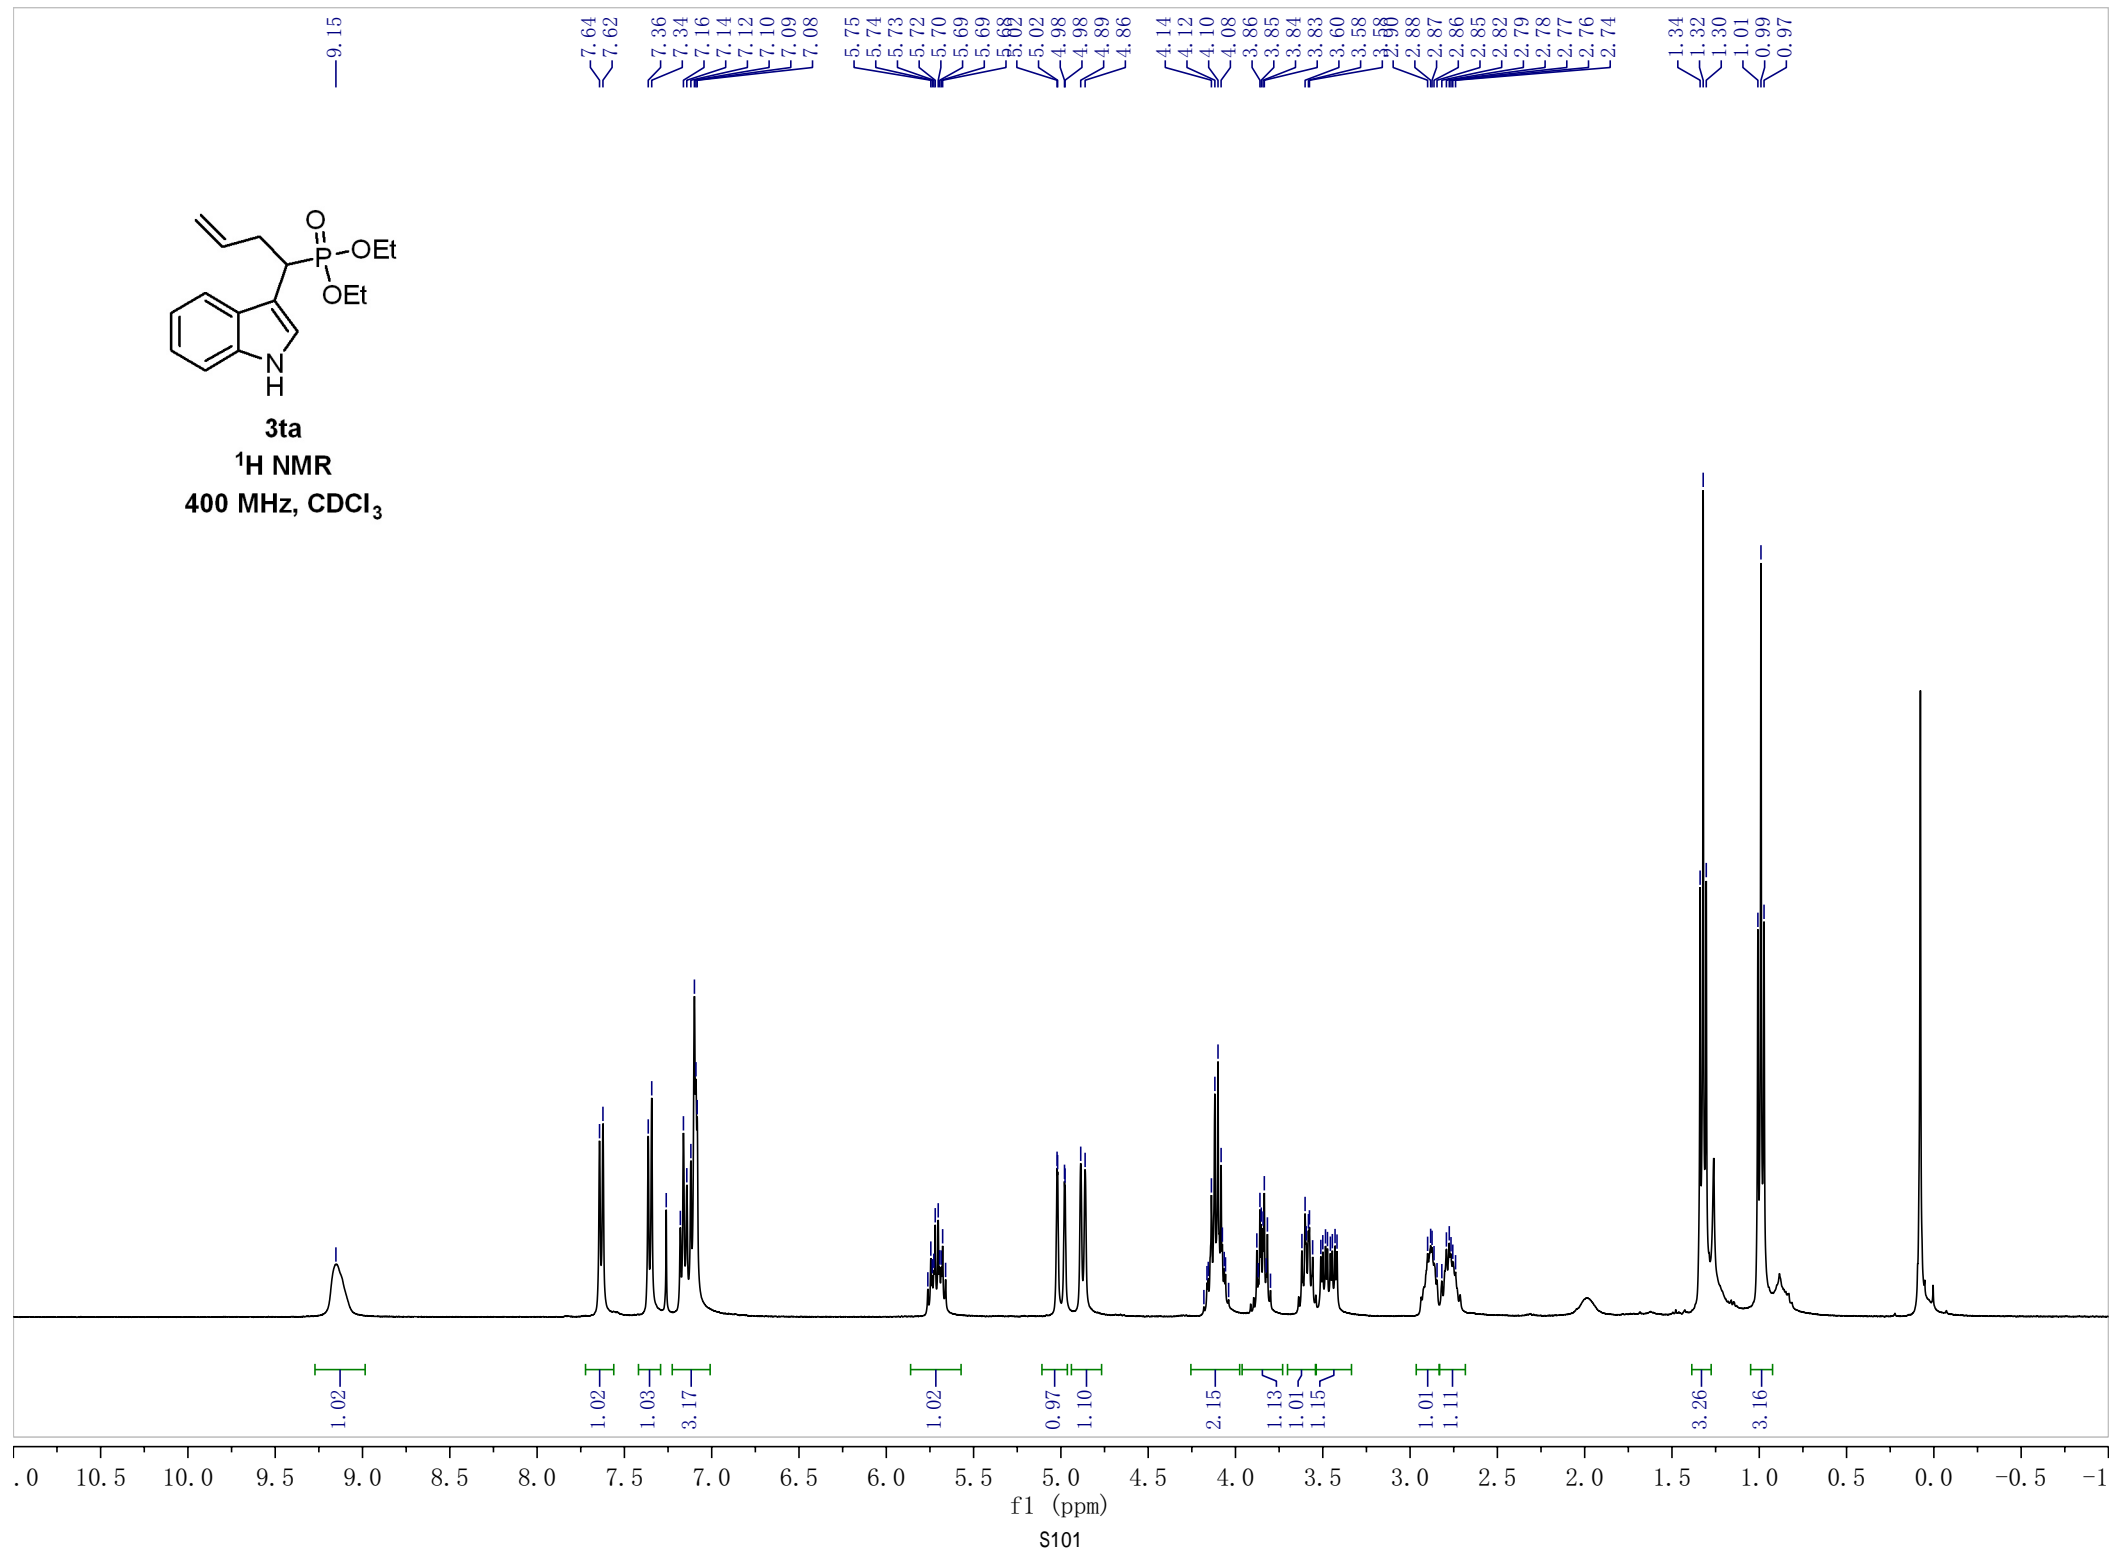

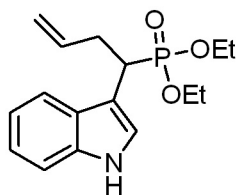

**3ta**

<sup>13</sup>C NMR  
101 MHz, CDCl<sub>3</sub>

136.03  
135.96  
135.80  
127.47  
127.41  
123.82  
123.75  
121.76  
119.21  
118.90  
116.38  
111.36  
109.16

77.32  
77.00  
76.68

62.63  
62.56  
61.79  
61.71

35.60  
34.41  
34.19

16.46  
16.40  
16.22  
16.16

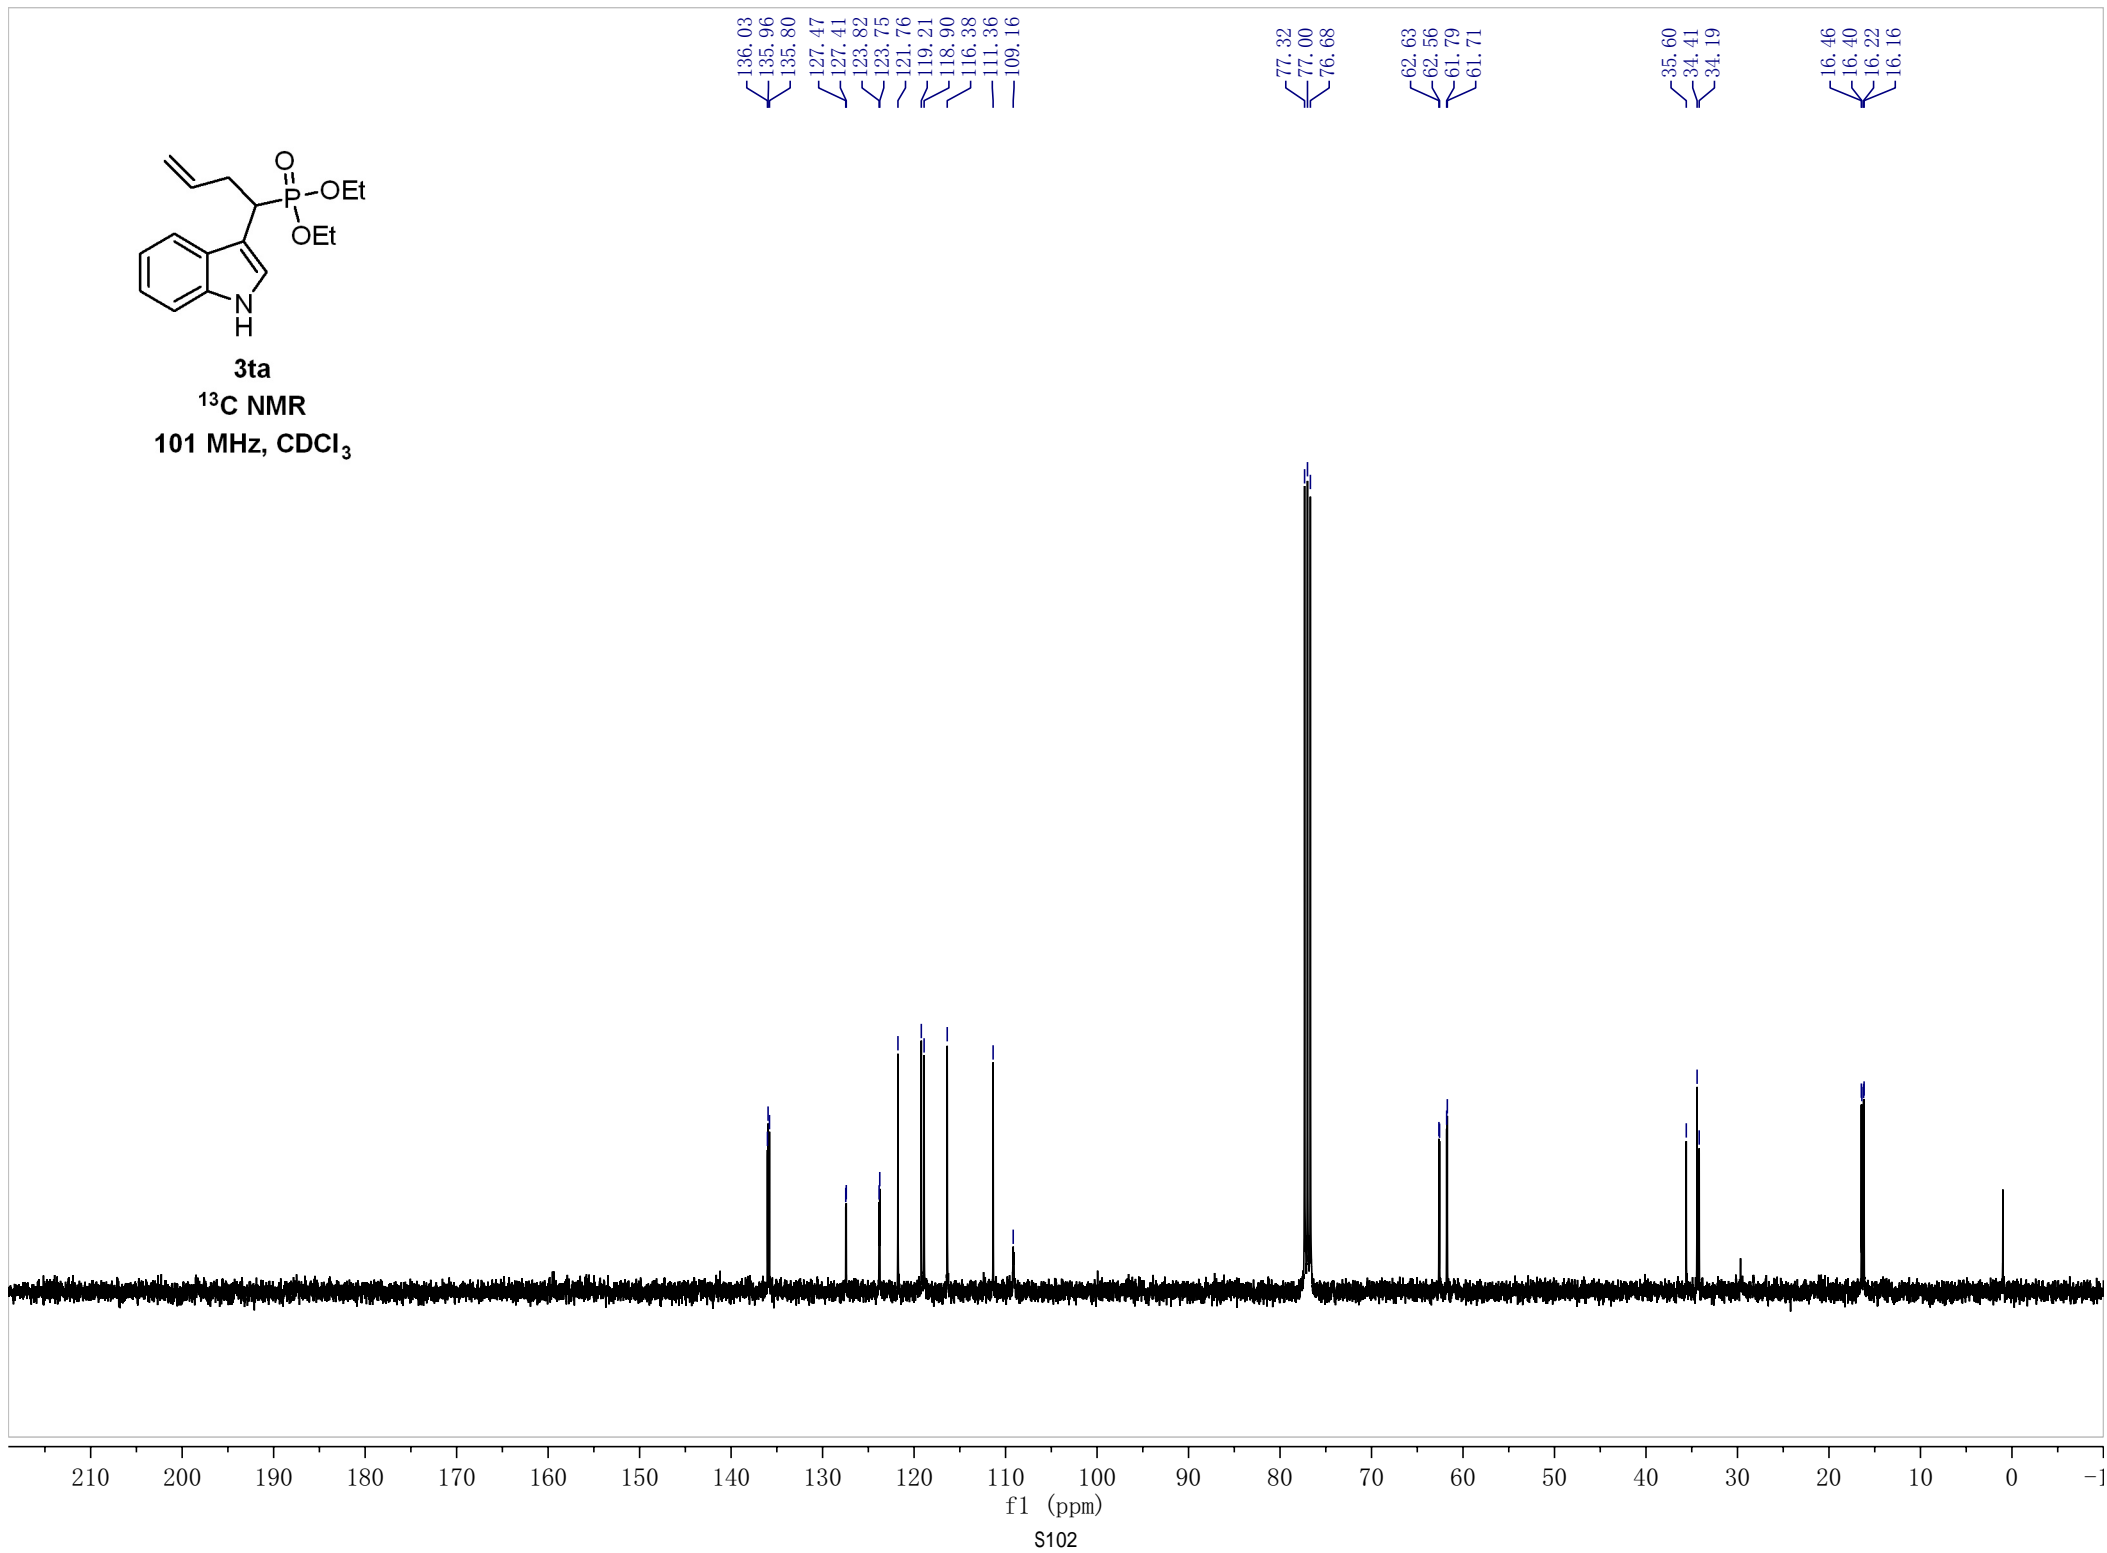

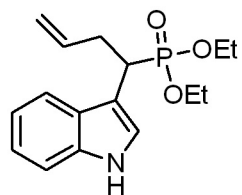

**3ta**

**<sup>31</sup>P NMR**

**162 MHz, CDCl<sub>3</sub>**

— 29.40

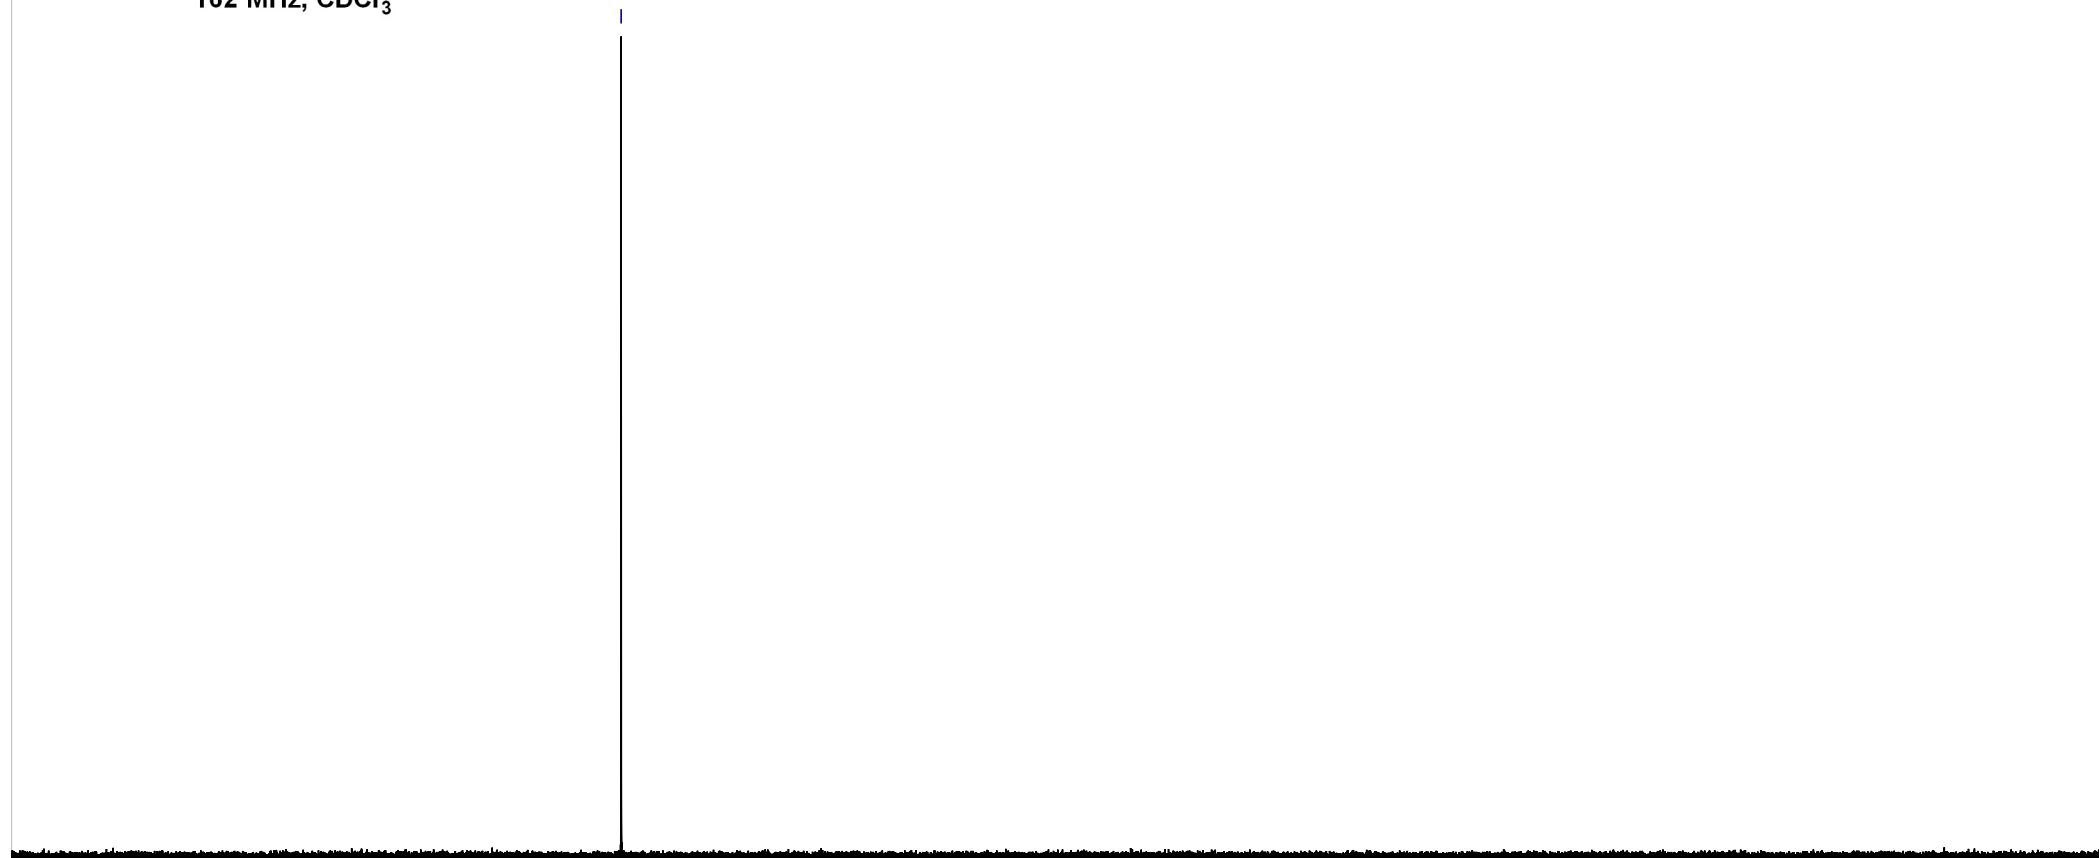

130 110 90 80 70 60 50 40 30 20 10 0 -10 -30 -50 -70 -90 -110 -130 -150 -170 -190 -210 -230

f1 (ppm)

S103

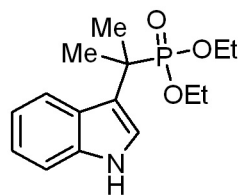

**3ua**

**<sup>1</sup>H NMR**  
**400 MHz, CDCl<sub>3</sub>**

9.44

8.00  
7.98

7.32

7.30

7.26

7.12

7.10

7.09

6.86

6.80

4.03

4.01

4.01

3.99

3.99

3.98

3.97

3.95

3.94

3.92

3.90

3.88

3.86

3.84

1.75

1.71

1.24

1.23

1.21

1.05

1.07

1.02

2.27

1.08

4.40

6.46

6.48

.0 10.5 10.0 9.5 9.0 8.5 8.0 7.5 7.0 6.5 6.0 5.5 5.0 4.5 4.0 3.5 3.0 2.5 2.0 1.5 1.0 0.5 0.0 -0.5

f1 (ppm)

S104



**3ua**

<sup>13</sup>C NMR  
101 MHz, CDCl<sub>3</sub>

136.92  
126.11  
123.59  
123.51  
122.18  
121.15  
118.71  
115.83  
111.45

77.32  
77.00  
76.68

62.24  
62.16

36.90  
35.49

24.19  
24.16

16.44  
16.39

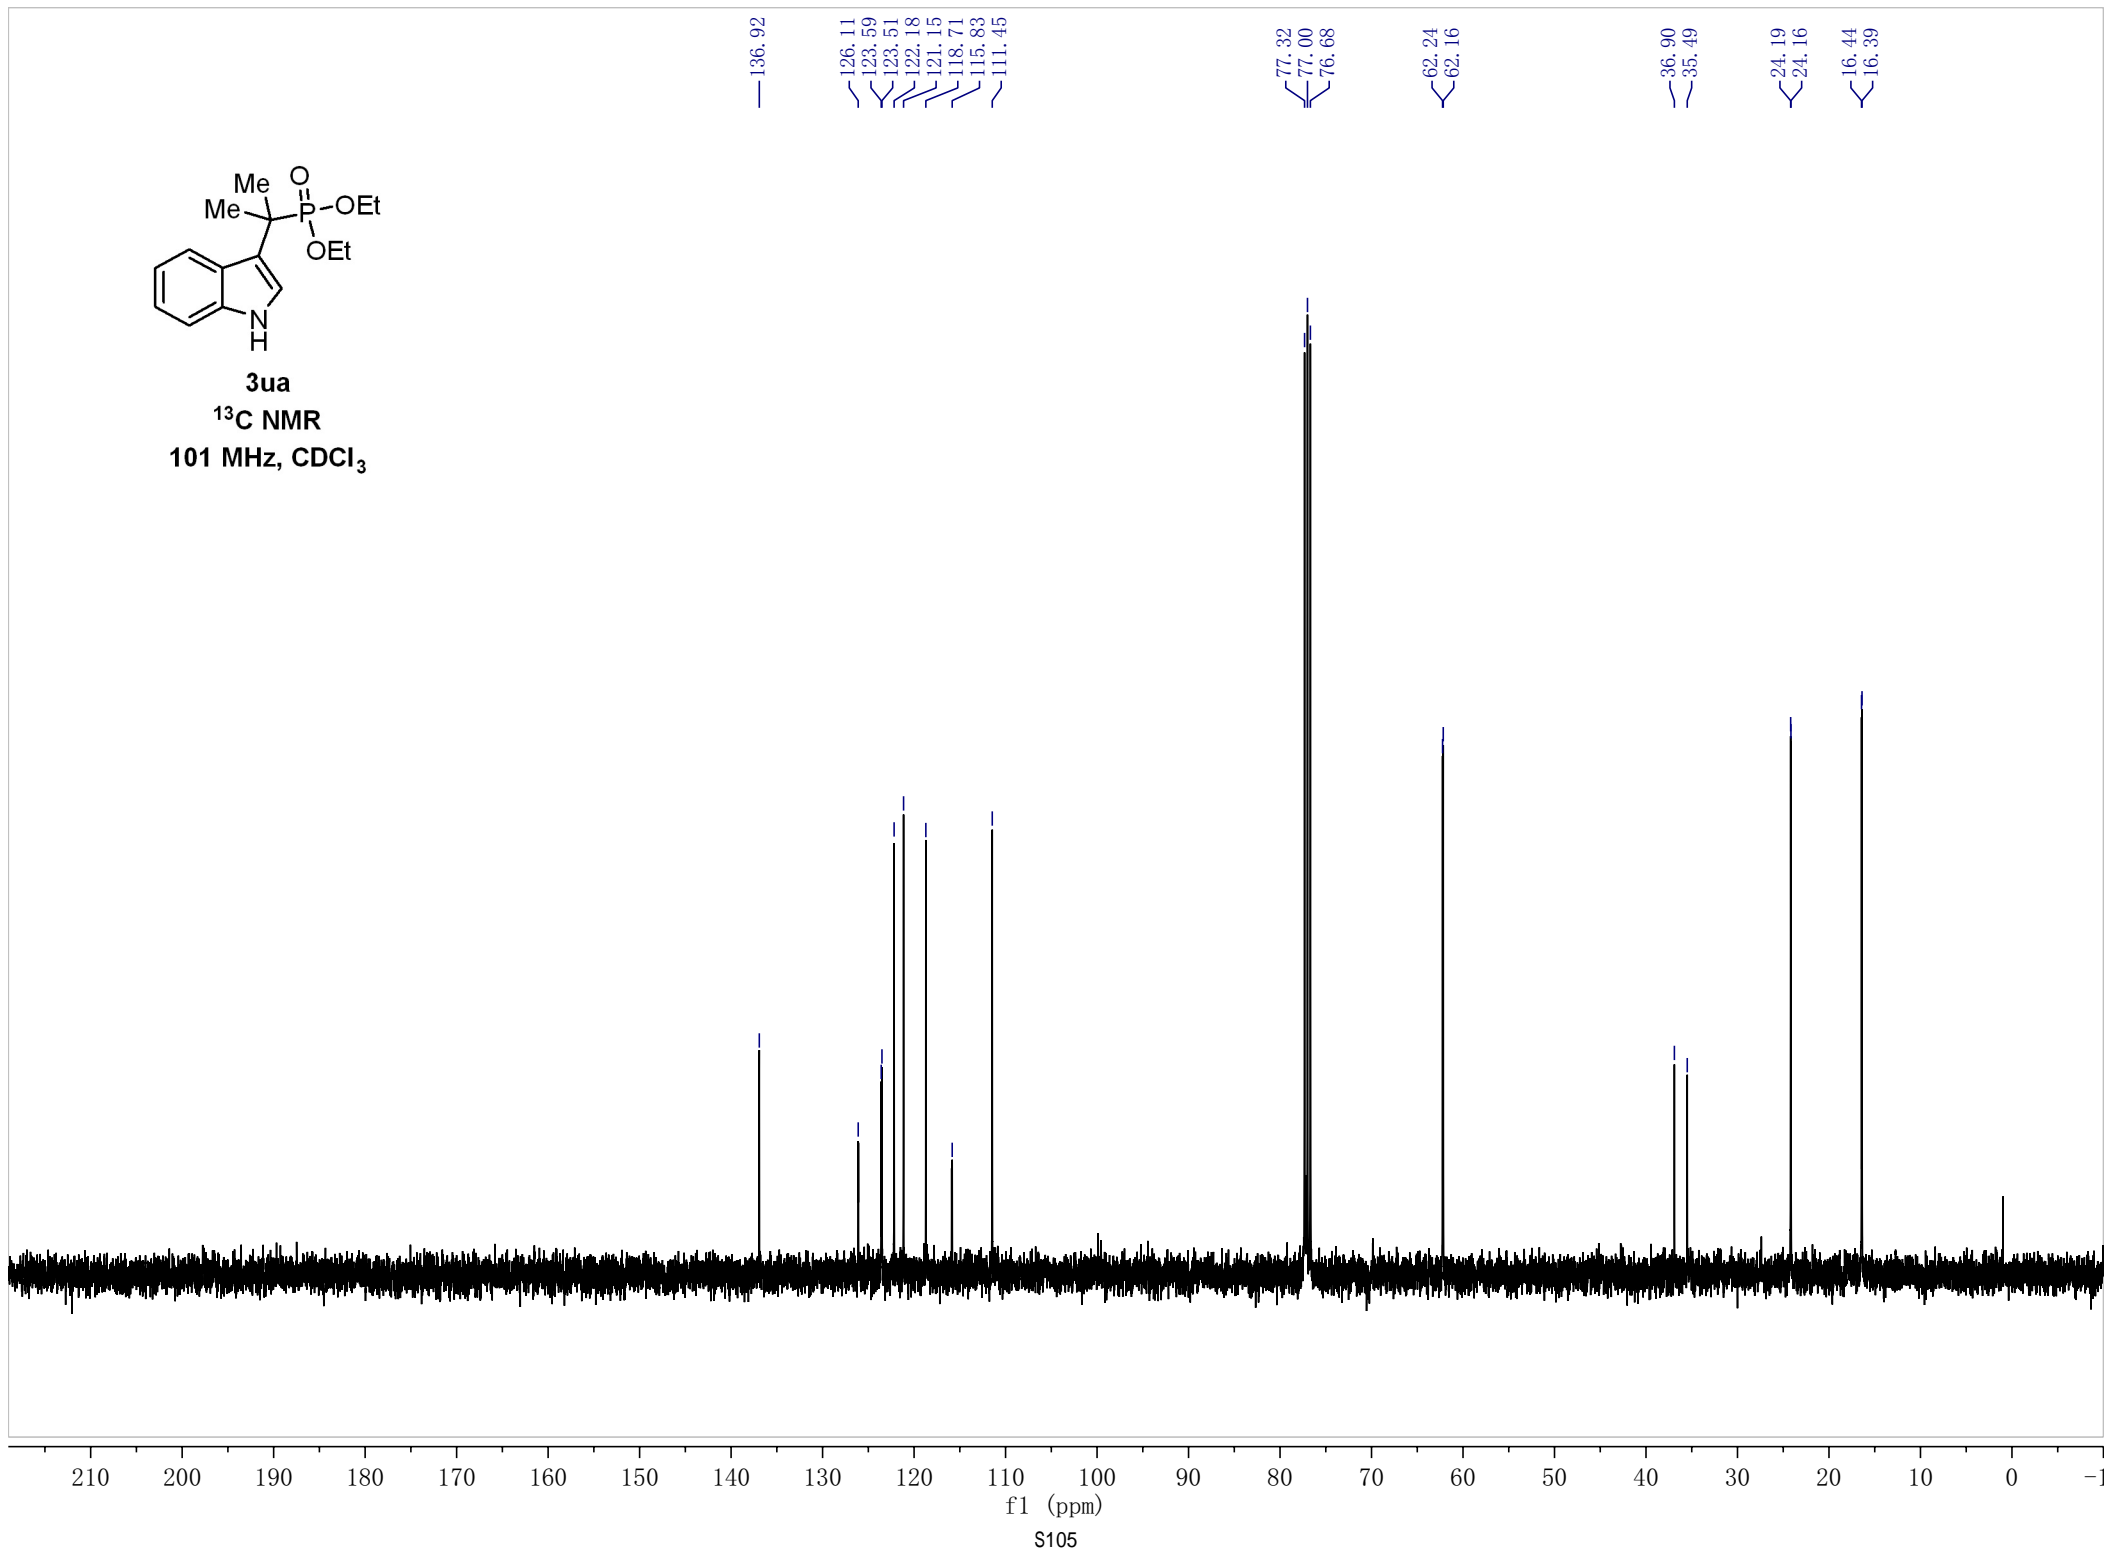

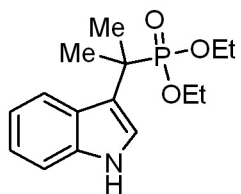

**3ua**  
**<sup>31</sup>P NMR**  
**162 MHz, CDCl<sub>3</sub>**

—33.44

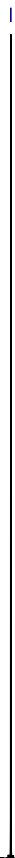

130 110 90 80 70 60 50 40 30 20 10 0 -10 -30 -50 -70 -90 -110 -130 -150 -170 -190 -210 -230

f1 (ppm)

S106

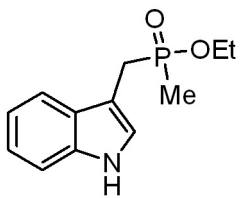

3ae

<sup>1</sup>H NMR  
400 MHz, CDCl<sub>3</sub>

8.95

7.58  
7.56  
7.37  
7.35  
7.26  
7.20  
7.18  
7.17  
7.16  
7.14  
7.14  
7.13  
7.11

4.11  
4.10  
4.09  
4.09  
4.08  
4.07  
4.06  
4.05  
4.04  
4.03  
4.02  
4.02  
3.31  
3.30  
3.27  
3.26

1.40  
1.37  
1.32  
1.30  
1.28

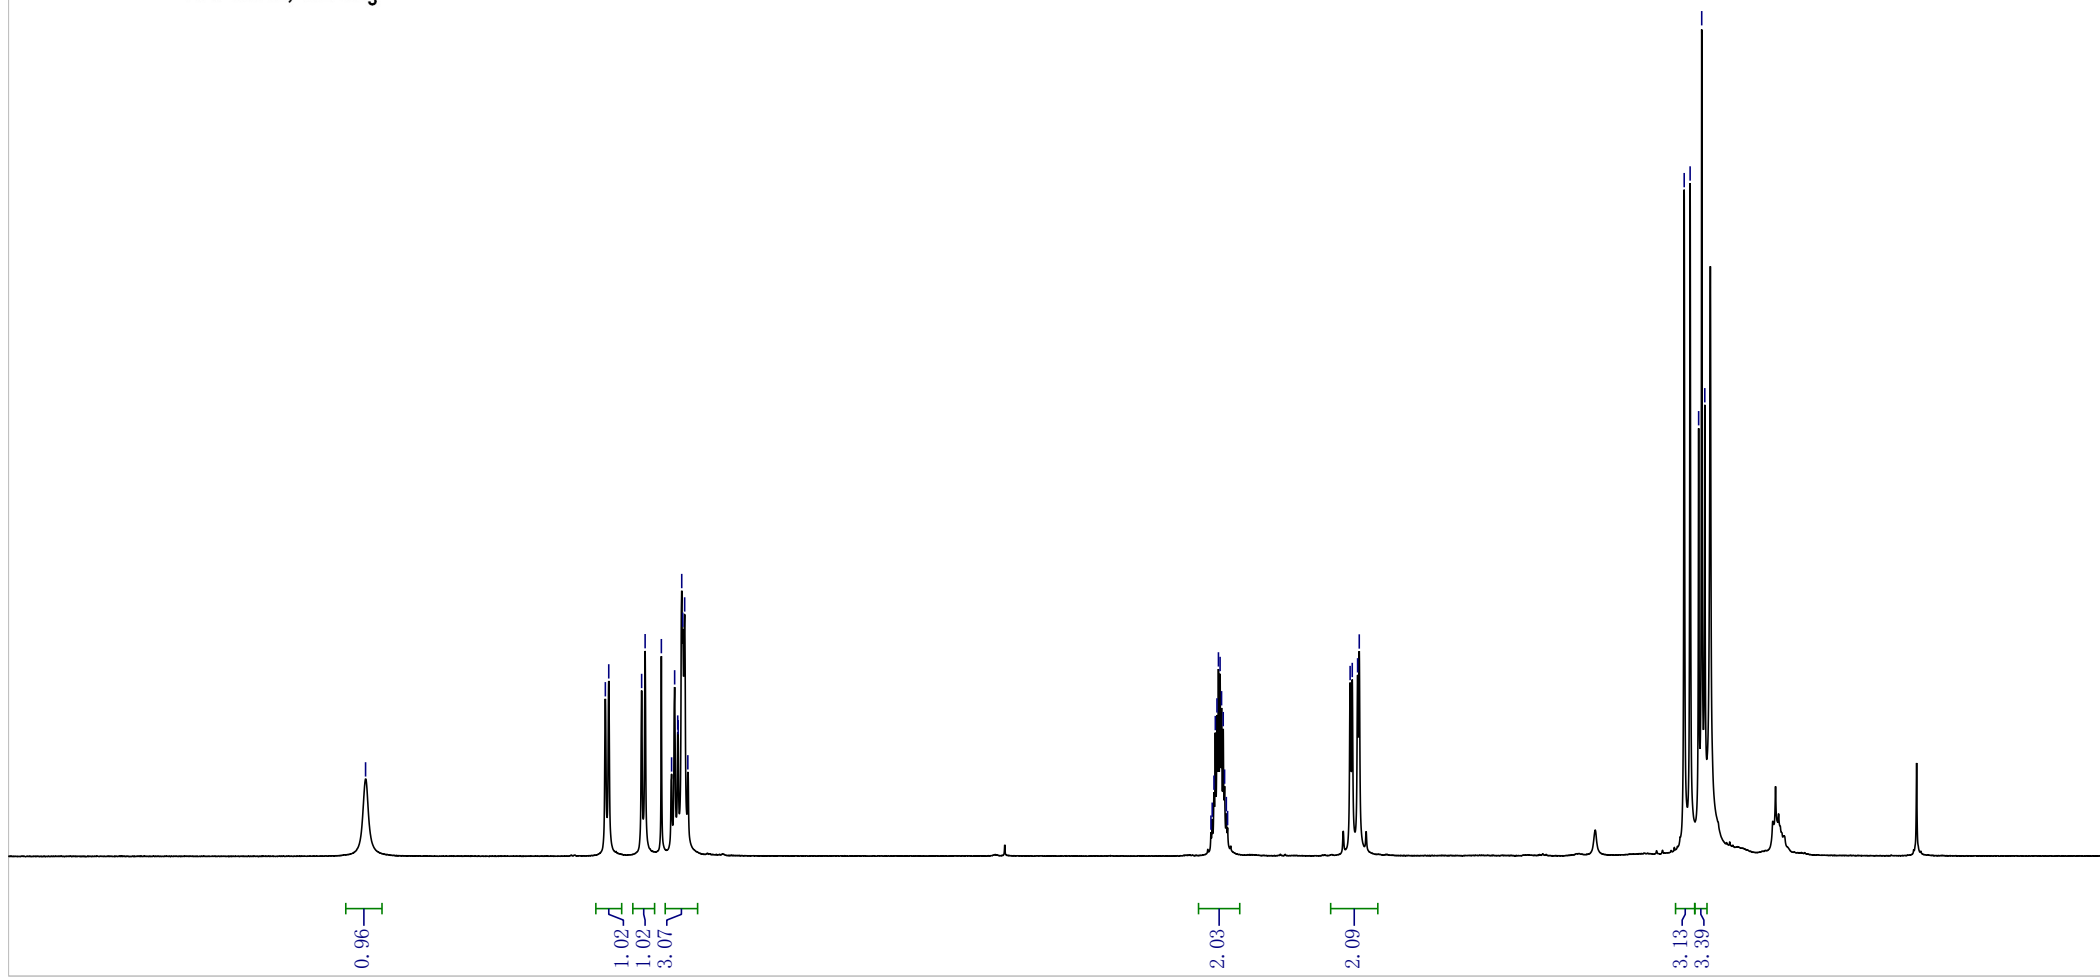

0.96

1.02  
1.02  
3.07

2.03

2.09

3.13  
3.39

.0 10.5 10.0 9.5 9.0 8.5 8.0 7.5 7.0 6.5 6.0 5.5 5.0 4.5 4.0 3.5 3.0 2.5 2.0 1.5 1.0 0.5 0.0 -0.5 -1

f1 (ppm)

S107

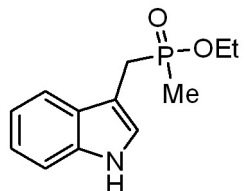

**3ae**

<sup>13</sup>C NMR  
101 MHz, CDCl<sub>3</sub>

- 136.06
- 127.24
- 123.80
- 123.73
- 121.98
- 119.48
- 118.39
- 111.41
- 104.85
- 77.32
- 77.00
- 76.68
- 60.45
- 60.39
- 27.40
- 26.47
- 16.68
- 16.62
- 13.77
- 12.84

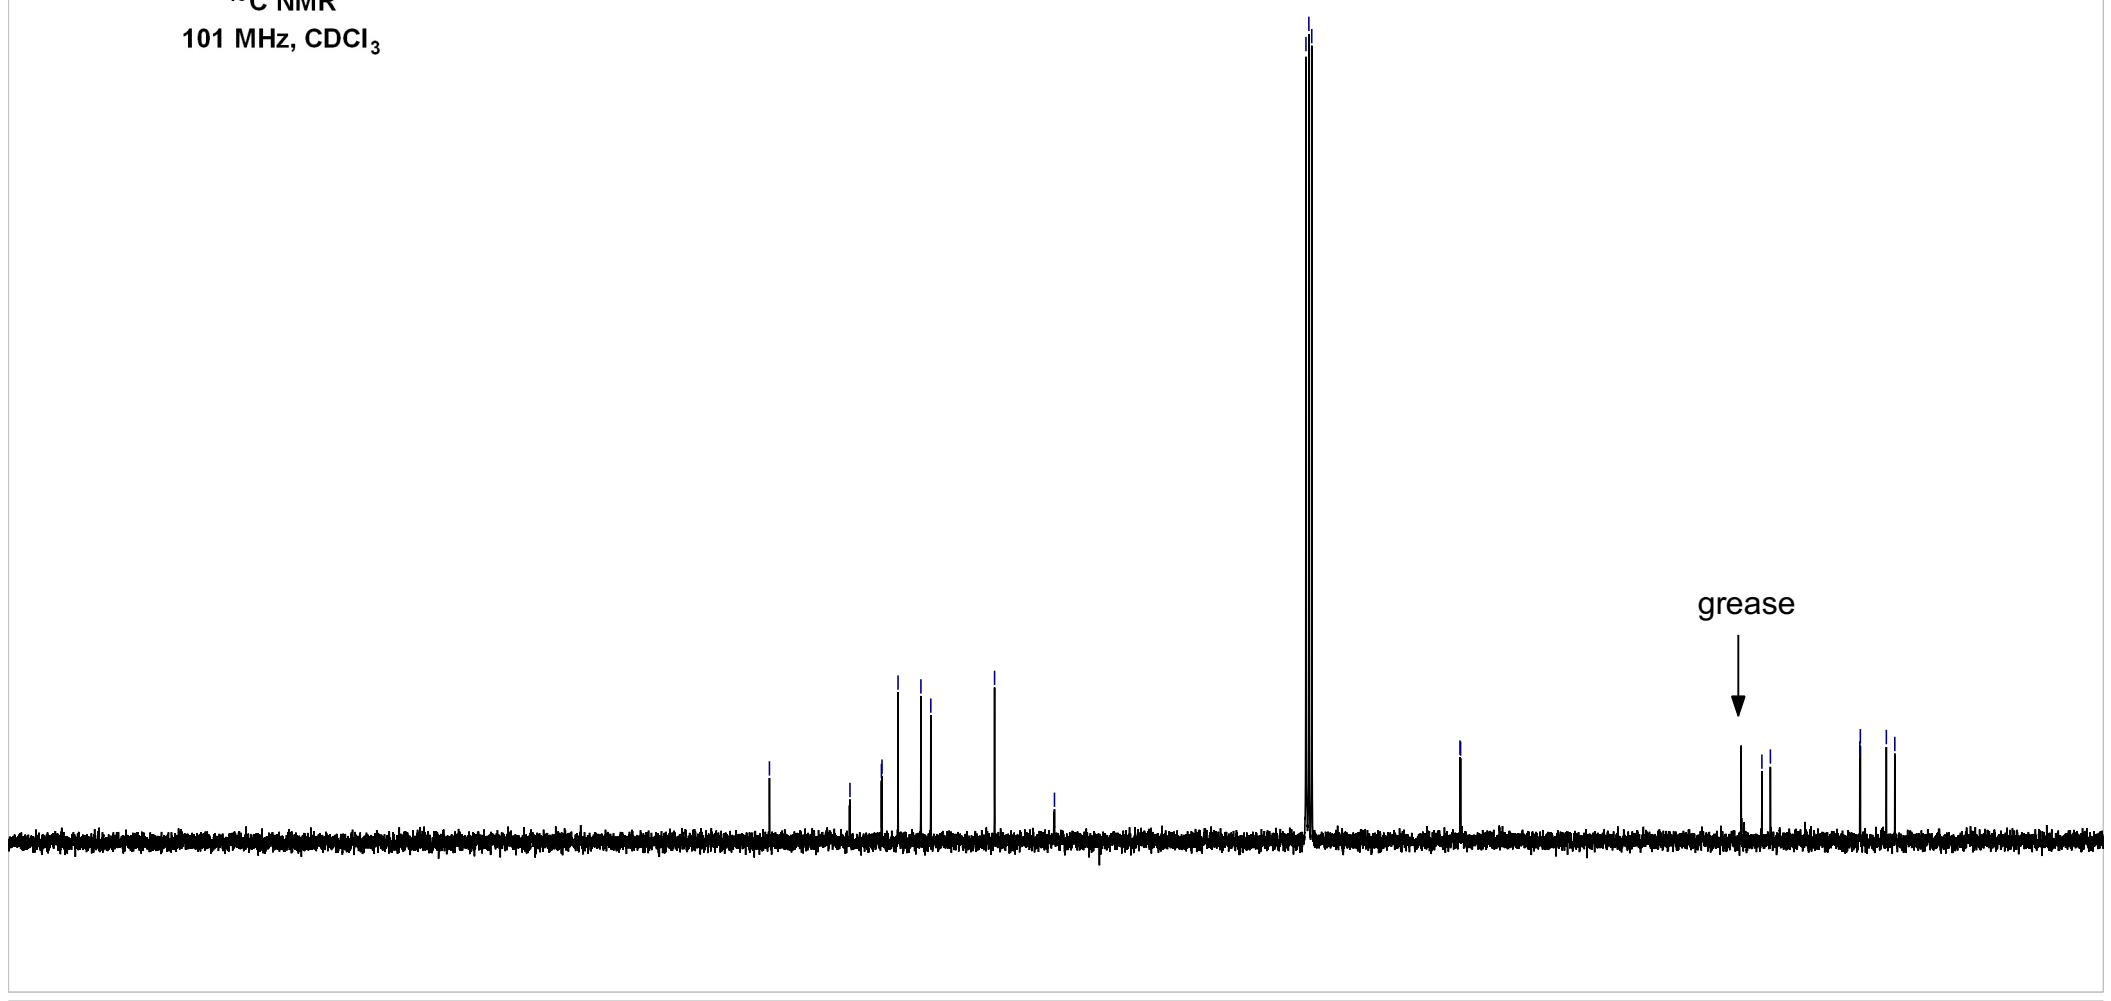



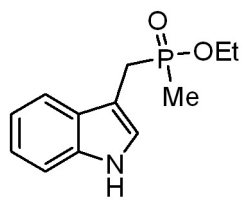

**3ae**

**<sup>31</sup>P NMR**  
**162 MHz, CDCl<sub>3</sub>**

—53.25

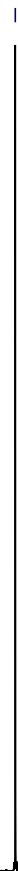

130 110 90 80 70 60 50 40 30 20 10 0 -10 -30 -50 -70 -90 -110 -130 -150 -170 -190 -210 -230

f1 (ppm)

S109

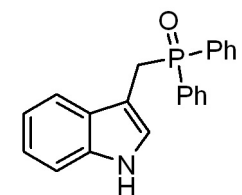

**3af**

**<sup>1</sup>H NMR**  
**400 MHz, DMSO-*d*<sub>6</sub>**

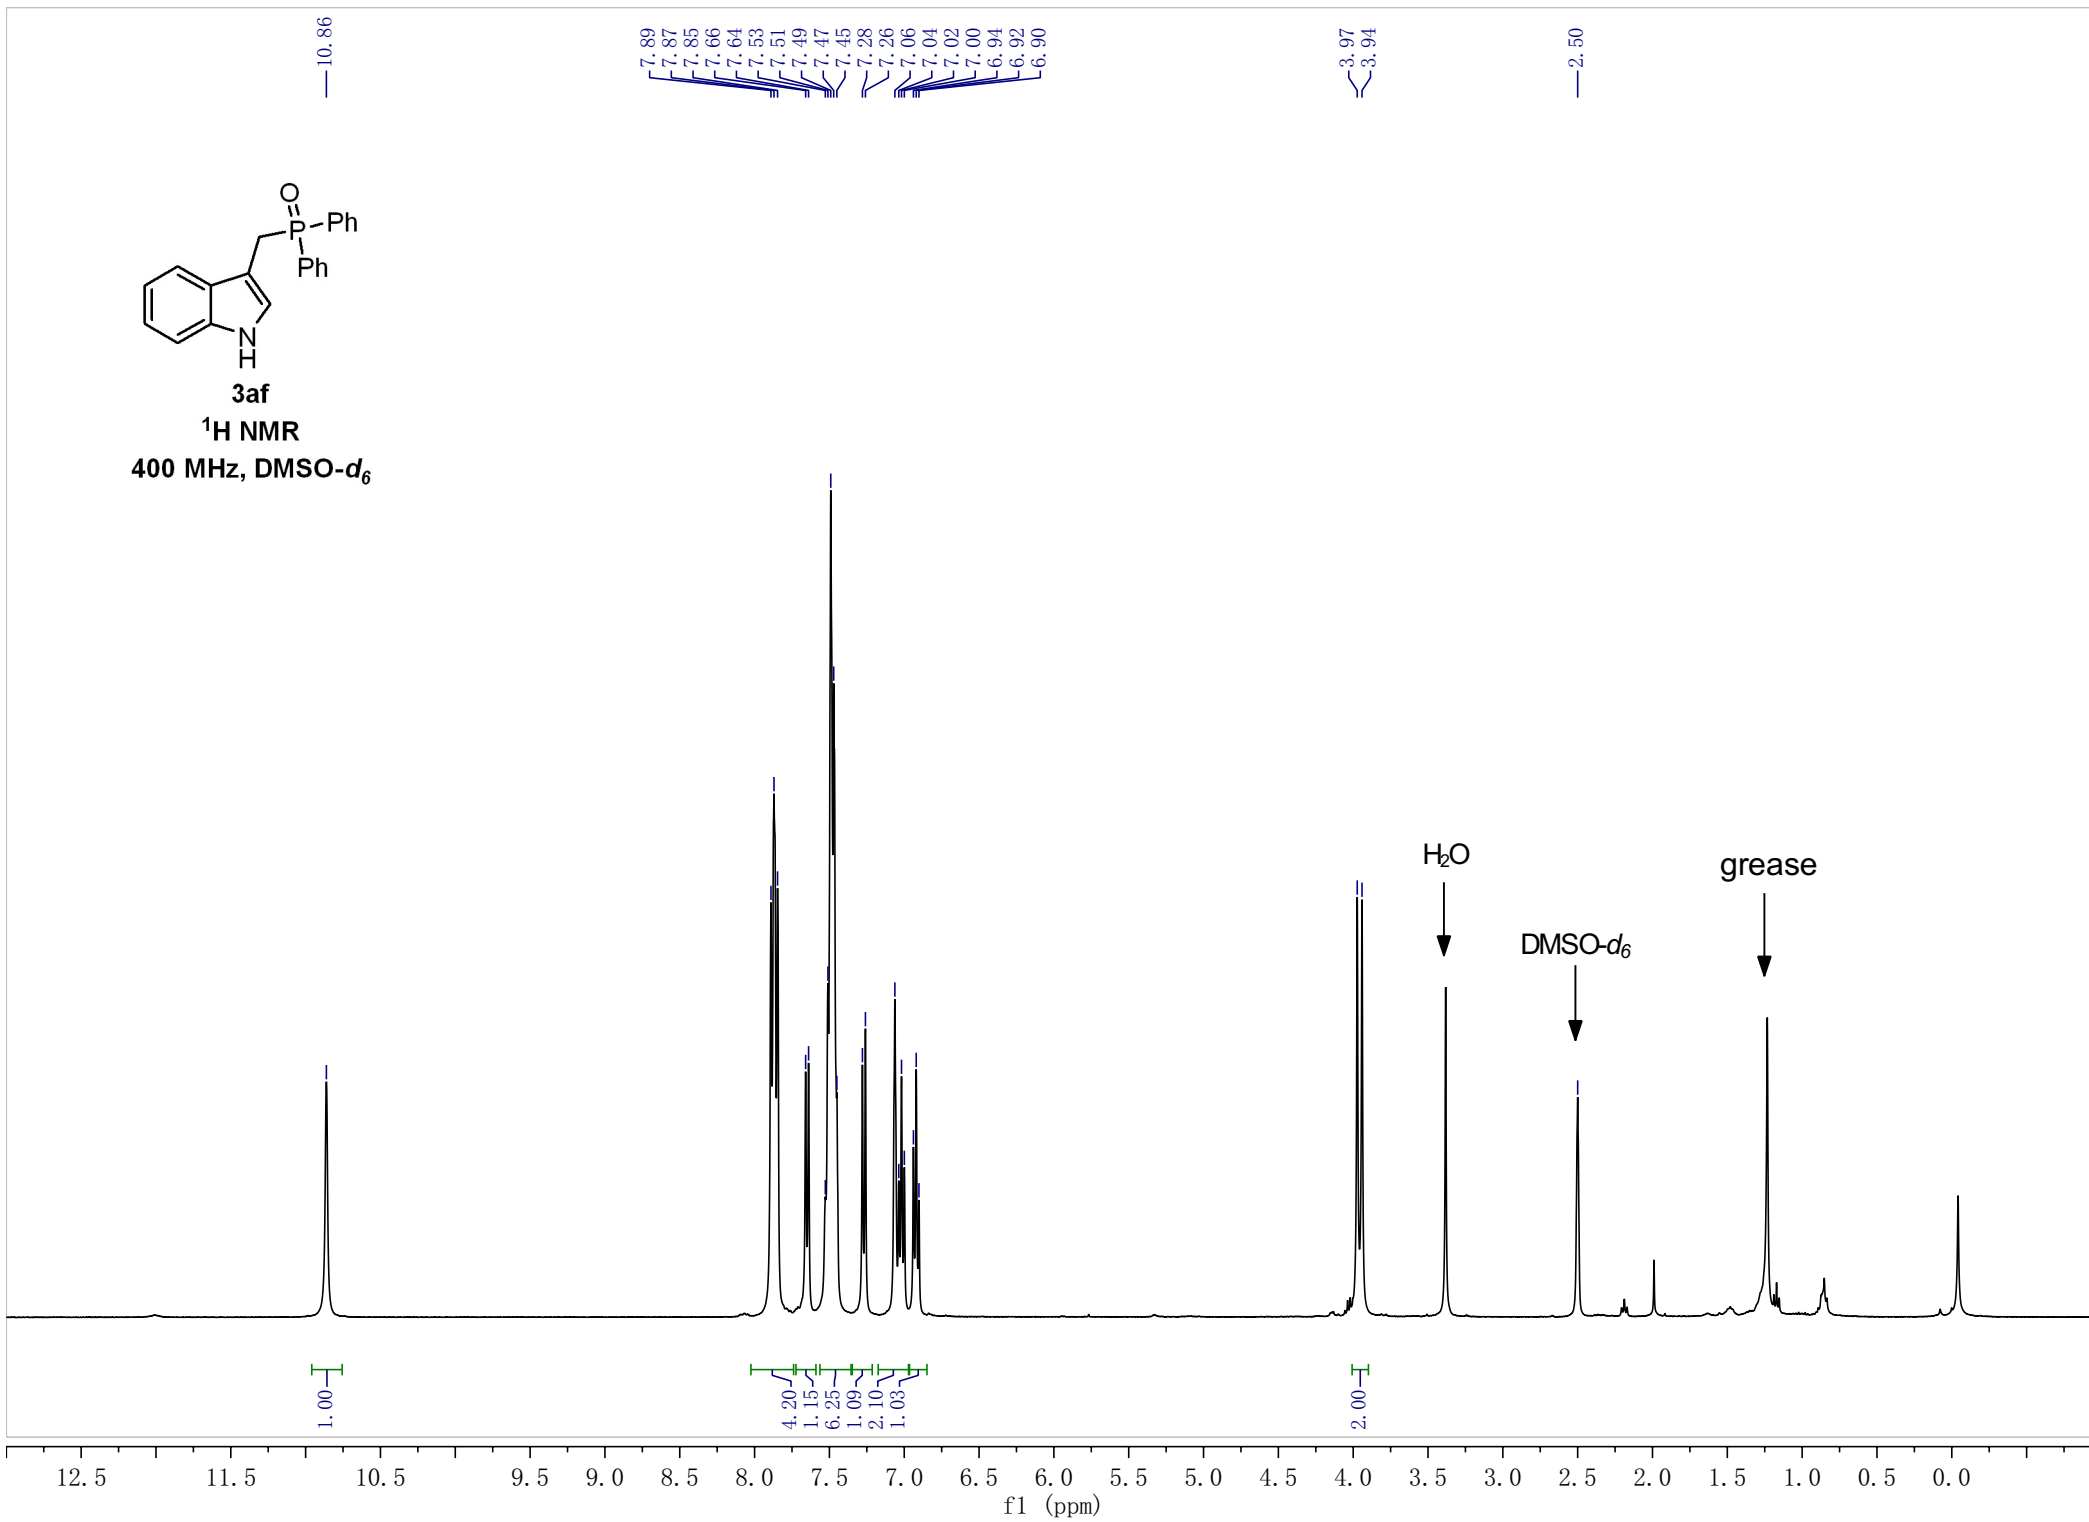

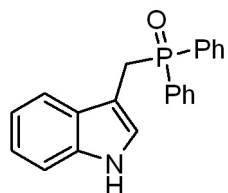

**3af**

**$^{13}\text{C}$  NMR**

**101 MHz, DMSO- $d_6$**

135.62  
134.68  
133.73  
131.41  
130.75  
130.66  
128.53  
128.42  
127.79  
124.42  
124.36  
120.93  
119.21  
118.28  
111.17  
104.09  
104.01

39.92  
39.71  
39.50  
39.29  
39.08  
26.45  
25.75

DMSO- $d_6$

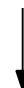

210 200 190 180 170 160 150 140 130 120 110 100 90 80 70 60 50 40 30 20 10 0 -1

f1 (ppm)

S111

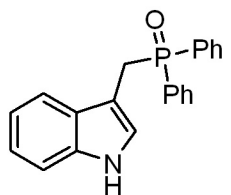

3af

<sup>31</sup>P NMR  
162 MHz, DMSO-d<sub>6</sub>

—27.50

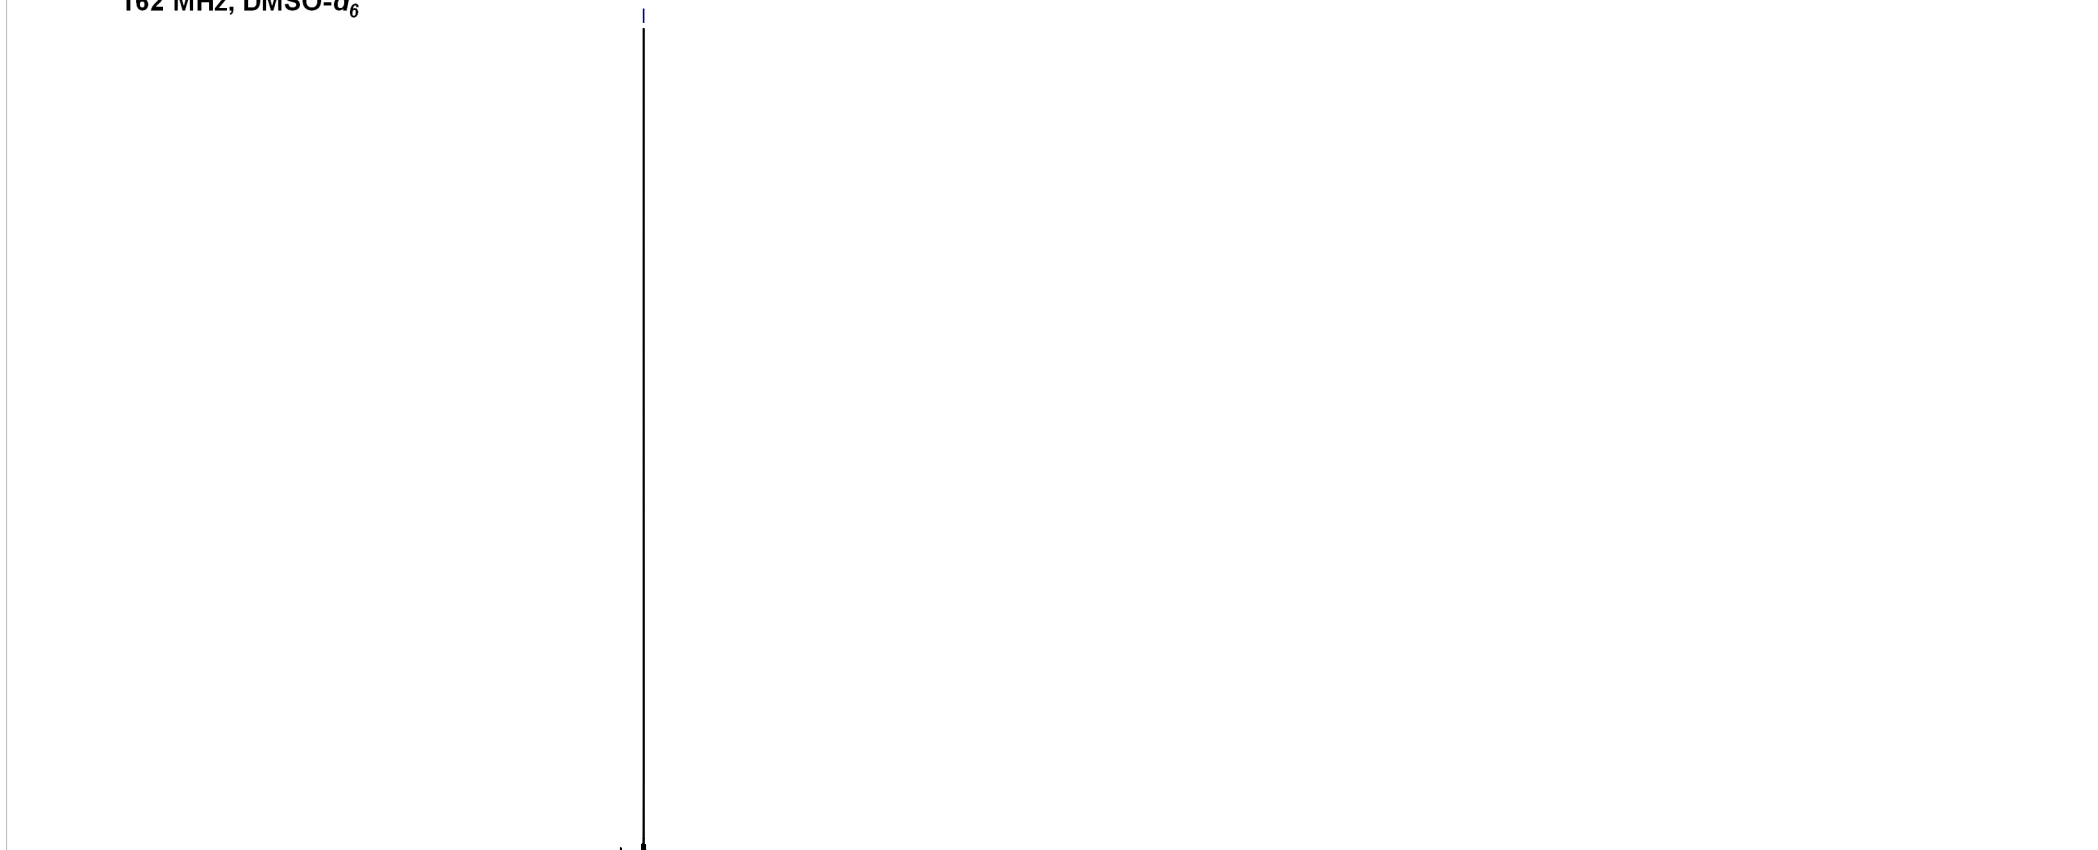

130 110 90 80 70 60 50 40 30 20 10 0 -10 -30 -50 -70 -90 -110 -130 -150 -170 -190 -210 -230

f1 (ppm)

S112
